# Supplementary material for: Rates of adverse events of antiretroviral therapy in women living with HIV/AIDS: a systematic review and meta-analysis
Source: PubMed Central journal article supplement — BMJ Open. 2024 Jul 31;14(7):e079292. doi: 10.1136/bmjopen-2023-079292 (PMC11293376; doi:10.1136/bmjopen-2023-079292), 2024-07-31
Supplement: bmjopen-14-7-s003.pdf [file bmjopen-14-7-s003.pdf]

## Antiretrovirals included in the review

Initially, we surveyed the ARV used by the Brazilian HIV/AIDS program (1,2). Additionally, we checked the drugs described in the WHO ATC, including those that were not used in Brazil (3). Afterward, we had a meeting with an infectologist who worked in the HIV/AIDS program of the Brazilian Ministry of Health to check which of the ARVs on the list were still being used in clinical practice.

In the title and abstract selection step, we collected the names of other ARV that had not been identified in the previous steps. As studies with ART no longer used in clinical practice or at doses other than those currently recommended were part of the exclusion criteria for our review, we checked the doses in different sources (1,2,4–7). We prepared a table with the description of the doses found. ARVs that did not have doses described in these sources were evaluated to determine whether they had been discontinued or were in development (8–10).

The ARV considered in this review, with the respective classes and doses used in adults and children, are described in Table S2.

**Table S2 – Antiretrovirals included in this review with the respective classes and doses (to be continued)**

| Antiretroviral | Pharmacological class                                      | Adult                       | Child                                                                                                                                                                                                                                                                                                                                                                                                                   |
|----------------|------------------------------------------------------------|-----------------------------|-------------------------------------------------------------------------------------------------------------------------------------------------------------------------------------------------------------------------------------------------------------------------------------------------------------------------------------------------------------------------------------------------------------------------|
| Abacavir       | Nucleoside and nucleotide reverse transcriptase inhibitors | 300 mg 12/12h<br>600 mg/day | Children $\geq$ 3 months<br>1) By weight (mg/kg)<br>8 mg/kg/dose 12/12h<br>16-20 mg/kg/dose/day<br>2) By weight range<br>14 - <20 kg 150 mg 12/12h; 300 mg/day<br>20 - <25 kg 150 mg/ morning and 300 mg/evening; 450 mg/day<br>$\geq$ 25 kg 300 mg 12/12h; 600 mg/day<br>or<br>14 - 20 kg 150 mg 12/12h; 300 mg/day<br>21 - 29 kg 150/morning and 300 mg/evening; 450 mg/day<br>$\geq$ 30 kg 300 mg 12/12h; 600 mg/day |

**Table S2 – Antiretrovirals included in this review with the respective classes and doses (continuation)**

| Antiretroviral | Pharmacological class        | Adult                                                                                                                                             | Child                                                                                                                                                                                                                                                                                                                                                                                                                                                                                                                                                                                                                                                                                                                                                                                                                           |
|----------------|------------------------------|---------------------------------------------------------------------------------------------------------------------------------------------------|---------------------------------------------------------------------------------------------------------------------------------------------------------------------------------------------------------------------------------------------------------------------------------------------------------------------------------------------------------------------------------------------------------------------------------------------------------------------------------------------------------------------------------------------------------------------------------------------------------------------------------------------------------------------------------------------------------------------------------------------------------------------------------------------------------------------------------|
| Atazanavir     | Protease inhibitors          | 300 mg/day with ritonavir or cobicistat<br>400 mg/day without ritonavir<br>400 mg/day with ritonavir if concomitant use of efavirenz or tenofovir | 1) Oral powder $\geq$ 3 months with ritonavir or cobicistat<br>5 - <15 kg 200 mg/day (if intolerance to this dose, 150 mg/day)<br>15 - <25 kg 250 mg/day<br>$\geq$ 25 kg 300 mg/day<br>2) Capsule $\geq$ 6 years and $\geq$ 15 kg with ritonavir or cobicistat<br>15 - <35 kg 200 mg/day<br>$\geq$ 35 kg 300 mg/day<br>or<br>15 kg - 20 kg 150 mg/day<br>20 kg - 40 kg 200 mg/day<br>$\geq$ 40 kg 200-300 mg/day<br>3) Without ritonavir or cobicistat<br>>6 - <13 years 520 mg m <sup>2</sup> /dose/day<br>13 - <18 years 620 mg m <sup>2</sup> /dose/day                                                                                                                                                                                                                                                                      |
| Bictegravir    | Integrase inhibitors         | 50 mg/day                                                                                                                                         | 14 - <25 kg 30 mg/day<br>$\geq$ 25 kg 50 mg/day                                                                                                                                                                                                                                                                                                                                                                                                                                                                                                                                                                                                                                                                                                                                                                                 |
| Cabotegravir   | Integrase inhibitors         | 1) Oral<br>30 mg/day<br>2) Injectable (IM) with rilpivirine starting dose 600 mg maintenance dose 400 mg/month                                    | $\geq$ 12 years and $\geq$ 35 kg<br>1) Oral<br>30 mg/day<br>2) Injectable (IM) with rilpivirine starting dose 600 mg maintenance dose 400 mg/month                                                                                                                                                                                                                                                                                                                                                                                                                                                                                                                                                                                                                                                                              |
| Cobicistat     | Cytochrome P450 3A inhibitor | 150 mg/day                                                                                                                                        | 1) With elvitegravir<br>$\geq$ 25 kg 150 mg/day<br>2) With atazanavir<br>$\geq$ 35 kg 150 mg/day<br>3) With darunavir<br>$\geq$ 40 kg 150 mg/day<br>Children $\geq$ 3 years<br>1) By weight (mg/kg)<br>10-15 kg: 20 mg/kg/twice/day<br>2) By weight range:<br>10-<11kg 200 mg twice/day; 350 mg/day<br>11-<12kg 220 mg twice/day; 385 mg/day<br>12-<13 kg 240 mg twice/day; 420 mg/day<br>13-<14 kg 260 mg twice/day; 455 mg/day<br>14-<15 kg 280 mg twice/day; 490 mg/day<br>15-<30 kg 375 mg twice/day; 600 mg/day<br>30-<40 kg 450 mg twice/day; 675 mg/day<br>$\geq$ 40 kg 600 mg twice/day; 800 mg/day<br>or<br>20-30 kg 375mg 12/12h<br>30-40 kg 450mg 12/12h<br>$\geq$ 40 kg 600mg 12/12h<br>or (for $\geq$ 12 years)<br>30 - <40 kg<br>400 mg twice/day<br>675 mg/day<br>$\geq$ 40 kg<br>800 mg/day<br>600 mg twice/day |
| Darunavir      | Protease inhibitors          | 800 mg/day<br>600 mg 12/12h                                                                                                                       | $\geq$ 40 kg 600 mg twice/day; 800 mg/day<br>or<br>20-30 kg 375mg 12/12h<br>30-40 kg 450mg 12/12h<br>$\geq$ 40 kg 600mg 12/12h<br>or (for $\geq$ 12 years)<br>30 - <40 kg<br>400 mg twice/day<br>675 mg/day<br>$\geq$ 40 kg<br>800 mg/day<br>600 mg twice/day                                                                                                                                                                                                                                                                                                                                                                                                                                                                                                                                                                   |

**Table S2 – Antiretrovirals included in this review with the respective classes and doses (continuation)**

| Antiretroviral | Pharmacological class                                      | Adult                                                                                                                          | Child                                                                                                                                                                                                                                                                                                                                                                                                                                                                                                                                                                                                                                                                        |
|----------------|------------------------------------------------------------|--------------------------------------------------------------------------------------------------------------------------------|------------------------------------------------------------------------------------------------------------------------------------------------------------------------------------------------------------------------------------------------------------------------------------------------------------------------------------------------------------------------------------------------------------------------------------------------------------------------------------------------------------------------------------------------------------------------------------------------------------------------------------------------------------------------------|
| Didanosine     | Nucleoside and nucleotide reverse transcriptase inhibitors | no longer used in adults                                                                                                       | 1) Powder for oral solution<br><60 kg 125 mg 12/12h; 250 mg/day<br>>= 60 kg 200 mg 12/12h; 400 mg/day<br>or<br>Children 1-7 months<br>50-100 mg/m <sup>2</sup> /dose 12/12h<br>Children 8 months-17 years<br>120-240 mg/m <sup>2</sup> /dose/day<br>2) Delayed release capsule<br>20 - <25 kg 200 mg/day<br>25 - <60 kg 250 mg/day<br>>= 60 kg 400 mg/day                                                                                                                                                                                                                                                                                                                    |
| Dolutegravir   | Integrase inhibitors                                       | 50 mg/day<br>50 mg 12/12h (if resistance or risk of interaction)                                                               | 1) Soluble tablets for oral solution<br>3 - <6 kg 5 mg/day<br>6 - <10 kg 15 mg/day<br>10 - <14 kg 20 mg/day<br>14 - < 20 kg 25 mg/day<br>>= 20 kg 30 mg/day<br>2) Tablets<br>14 - <20 kg 40 mg/day<br>>= 20 kg 50 mg/day; 50 mg 12/12h (if resistance or risk of interaction)                                                                                                                                                                                                                                                                                                                                                                                                |
| Doravirine     | Non-nucleoside reverse transcriptase inhibitors            | 100 mg/day                                                                                                                     | -                                                                                                                                                                                                                                                                                                                                                                                                                                                                                                                                                                                                                                                                            |
| Efavirenz      | Non-nucleoside reverse transcriptase inhibitors            | 600 mg/day<br>In some sources, if used in combination with tenofovir and lamivudine or tenofovir and emtricitabine: 400 mg/day | 1) Children aged 3 months to <3 years<br>Extensive metabolizers<br>3 - <5 kg 200 mg/day<br>5 - <7 kg 300 mg/day<br>7 - <14 kg 400 mg/day<br>14 - <17 kg 500 mg/day<br>>= 17 kg 600 mg/day<br>Slow metabolizers<br>3 - <7 kg 50 mg/day<br>7 - <14 kg 100 mg/day<br>>= 14 kg 150 mg/day<br>Another scheme<br>3,5 - < 5 kg 100 mg/day<br>5 - <7,5 kg 150 mg/day<br>7,5 - <15 kg 200 mg/day<br>15 - <20 kg 250 mg/day<br>2) Children >3 years and adolescents<br>10 - <15 kg 200 mg/day<br>15 - <20 kg 250 mg/day<br>20 - <25 kg 300 mg/day<br>25 - <32,5 kg 350 mg/day<br>32,5 - <40 kg 400 mg/day<br>>= 40 kg 600 mg/day<br>By body surface<br>367 mg/m <sup>2</sup> /dose/day |

**Table S2 – Antiretrovirals included in this review with the respective classes and doses (continuation)**

| Antiretroviral | Pharmacological class                                      | Adult                                                                                                                                            | Child                                                                                                                                                                                                                                                                                                                                                           |
|----------------|------------------------------------------------------------|--------------------------------------------------------------------------------------------------------------------------------------------------|-----------------------------------------------------------------------------------------------------------------------------------------------------------------------------------------------------------------------------------------------------------------------------------------------------------------------------------------------------------------|
| Elsulfavirine  | Non-nucleoside reverse transcriptase inhibitors            | Approved only in Russia                                                                                                                          | Approved only in Russia                                                                                                                                                                                                                                                                                                                                         |
| Elvitegravir   | Integrase inhibitors                                       | 85 mg/day with ritonavir plus atazanavir or lopinavir<br>150 mg/day with ritonavir plus darunavir or fosamprenavir<br>150 mg/day with cobicistat | Children 6-11 years<br>>= 25 kg 150 mg/day<br>Children 12-17 years<br>>=35 kg 150 mg/day                                                                                                                                                                                                                                                                        |
| Emtricitabine  | Nucleoside and nucleotide reverse transcriptase inhibitors | capsule 200 mg/day<br>solution 240 mg/day                                                                                                        | 1) Children 1 - <3 months<br>3 mg/kg/dose/day<br>2) Children >= 3 months<br>Oral solution<br><33 kg 6 mg/kg/dose/day<br>>= 33 kg 240 mg/day<br>capsule<br>>= 25 kg 200 mg/day                                                                                                                                                                                   |
| Enfuvirtide    | Fusion inhibitors                                          | 90 mg subcutaneous twice/day                                                                                                                     | Children 6-16 years (>= 11 kg)<br>1) By weight 2 mg/kg/dose twice/day<br>2) By weight range<br>11 - 15,5 kg 27 mg twice/day<br>15,6 - 20 kg 36 mg twice/day<br>21,1 - 24,5 kg 45 mg twice/day<br>24,6 - 29 kg 54 mg twice/day<br>29,1 - 33,5 kg 63 mg twice/day<br>33,6 - 38 kg 72 mg twice/day<br>38,1 - 42,5 kg 81 mg twice/day<br>>= 42,6 kg 90 mg twice/day |
| Etravirine     | Non-nucleoside reverse transcriptase inhibitors            | 200mg twice/day                                                                                                                                  | Children >=2 years (>= 10 kg)<br>10 - <20 kg 100 mg 12/12h<br>20 - < 25 kg 125 mg 12/2h<br>25 - <30 kg 150 mg 12/12h<br>>= 30 kg 200 mg 12/12h                                                                                                                                                                                                                  |
| Fosamprenavir  | Protease inhibitors                                        | With ritonavir:<br>700 mg 12/12h<br>1400 mg/day<br>Without ritonavir:<br>1400 mg 12/12h                                                          | With ritonavir:<br><11 kg 45 mg/kg/dose 12/12h<br>11 - <15 kg 30 mg/kg/dose 12/12h<br>15 - <20 kg 23 mg/kg/dose 12/12h<br>20 - <40 kg 18 mg/kg/dose 12/12h<br>>= 40 kg 700 mg 12/12h<br>Without ritonavir:<br>>= 2 years 30 mg/kg/dose 12/12h<br>>= 47 kg 1400 mg 12/12h                                                                                        |
| Fostemsavir    | Fusion inhibitors                                          | 600 mg 12/12h                                                                                                                                    | -                                                                                                                                                                                                                                                                                                                                                               |

**Table S2 – Antiretrovirals included in this review with the respective classes and doses (continuation)**

| Antiretroviral | Pharmacological class                                      | Adult                                                            | Child                                                                                                                                                                                                                                                                                                                                                                                                                                                                                                                                                                                                                 |
|----------------|------------------------------------------------------------|------------------------------------------------------------------|-----------------------------------------------------------------------------------------------------------------------------------------------------------------------------------------------------------------------------------------------------------------------------------------------------------------------------------------------------------------------------------------------------------------------------------------------------------------------------------------------------------------------------------------------------------------------------------------------------------------------|
| Ibalizumab     | Post-attachment inhibitors                                 | Starting dose 2 g IV<br>Maintenance dose 800 mg IV every 14 days | -                                                                                                                                                                                                                                                                                                                                                                                                                                                                                                                                                                                                                     |
| Indinavir      | Protease inhibitors                                        | 800 mg 8/8h<br>800 mg 12/12h with ritonavir                      | 350 a 500 mg/m <sup>2</sup> /dose 8/8h<br>400 mg/m <sup>2</sup> /dose 12/12h with ritonavir<br><br>1) By weight (mg/kg)<br><3 months 4 mg/kg/dose 12/12h<br>>=3 months 5 mg/kg/dose 12/12h<br>>= 3 years 8-10 mg/kg/dose/day<br>2) By weight range<br>3 - <6 kg 30 mg 12/12h<br>6 - <10 kg 40 mg 12/12h<br>10 - <14 kg 60 mg 12/12h<br>14 - <20 kg 75 mg 12/12h; 150 mg/day<br>20 - <25 kg 75 mg/morning and 150 mg/night; 225 mg/day<br>>=25 kg 150 mg 12/12h; 300 mg/day<br>or<br>14 - 21 kg 75 mg 12/12h; 150 mg/day<br>21 - 29 kg 75 mg/morning and 150 mg/night; 225 mg/day<br>>=30 kg 150 mg 12/12h; 300 mg/day |
| Lamivudine     | Nucleoside and nucleotide reverse transcriptase inhibitors | 150 mg 12/12h<br>300 mg/day                                      |                                                                                                                                                                                                                                                                                                                                                                                                                                                                                                                                                                                                                       |

**Table S2 – Antiretrovirals included in this review with the respective classes and doses (continuation)**

| Antiretroviral | Pharmacological class | Adult                                                                                                                                         | Child                                                                                                                                                                                                                                                                                                                                                                                                                                                                                                                                                                                                                                                                                                                                                                                                                                                                                                                                                                                                                                                                                                                                                                                                                                                                                                                                                                                                                                                                                                                                                                                                                                                                                                                                                                                                                                                                                         |
|----------------|-----------------------|-----------------------------------------------------------------------------------------------------------------------------------------------|-----------------------------------------------------------------------------------------------------------------------------------------------------------------------------------------------------------------------------------------------------------------------------------------------------------------------------------------------------------------------------------------------------------------------------------------------------------------------------------------------------------------------------------------------------------------------------------------------------------------------------------------------------------------------------------------------------------------------------------------------------------------------------------------------------------------------------------------------------------------------------------------------------------------------------------------------------------------------------------------------------------------------------------------------------------------------------------------------------------------------------------------------------------------------------------------------------------------------------------------------------------------------------------------------------------------------------------------------------------------------------------------------------------------------------------------------------------------------------------------------------------------------------------------------------------------------------------------------------------------------------------------------------------------------------------------------------------------------------------------------------------------------------------------------------------------------------------------------------------------------------------------------|
| Lopinavir      | Protease inhibitors   | 400 mg 12/12h<br>800 mg/day<br>If in combination with efavirenz, nelfinavir or nevirapine:<br>solution 520 mg 12/12h<br>tablets 500 mg 12/12h | <p>Children <math>\geq</math> 14 days</p> <p>1) By weight (mg/kg)<br/>16 mg/kg/dose 12/12h</p> <p>2) By weight range<br/>&lt;15 kg 12 mg/kg/dose 12/12h<br/>15-40 kg 10 mg/kg/dose 12/12h<br/>&gt;40 kg 400 mg 12/12h<br/>or tablet:<br/><math>\geq</math> 15 kg - 25 kg 200 mg 12/12h<br/>&gt;25 - 35 kg 300 mg 12/12h<br/>&gt;35 kg 400 mg 12/12h</p> <p>3) By body surface<br/>230 ou 300 mg/m<sup>2</sup>/dose 12/12h<br/><math>\geq</math>0,6 - &lt;0,9 m<sup>2</sup> 200 mg 12/12h<br/><math>\geq</math>0,9 - &lt;1,4 m<sup>2</sup> 300 mg 12/12h<br/><math>\geq</math>1,4 m<sup>2</sup> 400 mg 12/12h<br/>or<br/>Children 14 days-5 months<br/>3,75 mL/m<sup>2</sup> 12/12h<br/>Children 6 months-17 years<br/>2,9 mL/m<sup>2</sup> 12/12h<br/>Children 2-17 years<br/>0,5 - 0,7 m<sup>2</sup> 200 mg 12/12h<br/>0,8 - 1,1 m<sup>2</sup> 300 mg 12/12h<br/><math>\geq</math>1,2 m<sup>2</sup> 400 mg 12/12h</p> <p>4) Special situations<br/>* If experienced on ARV or with decreased sensitivity to lopinavir:<br/>&lt;15 kg 13 mg/kg/dose 12/12h<br/>15-45 kg 11 mg/kg/dose 12/12h<br/>&gt;45 kg 400 mg 12/12h<br/>or tablet:<br/><math>\geq</math> 15 kg - 20 kg 200 mg 12/21h<br/>&gt;20 - 30 kg 300 mg 12/12h<br/>&gt;30 kg 400 mg 12/12h<br/>* If in combination with efavirenz, nelfinavir or nevirapine:<br/>300 mg/m<sup>2</sup>/dose 12/12h<br/><math>\geq</math>0,6 - &lt;0,8 m<sup>2</sup> 200 mg 12/12h<br/><math>\geq</math>0,8 - &lt;1,2 m<sup>2</sup> 300 mg 12/12h<br/><math>\geq</math>1,2 - &lt;1,7 m<sup>2</sup> 400 mg 12/12h<br/><math>\geq</math>1,7 m<sup>2</sup> 500 mg 12/12h<br/>&lt;15 kg 13 mg/kg/dose 12/12h<br/>15-45 kg 11 mg/kg/dose 12/12h<br/>&gt; 45 kg solução 520 mg 12/12h<br/>or tablet:<br/><math>\geq</math> 15 kg - 20 kg 200 mg 12/21h<br/>&gt;20 - 30 kg 300 mg 12/12h<br/>&gt;30 - 45 kg 400 mg 12/12h<br/>&gt; 45 kg 500 mg 12/12h</p> |

**Table S2 – Antiretrovirals included in this review with the respective classes and doses (continuation)**

| Antiretroviral | Pharmacological class                           | Adult                                                                                                                      | Child                                                                                                                                                                                                                                                                                                                                                                                                                                                                                                                                               |
|----------------|-------------------------------------------------|----------------------------------------------------------------------------------------------------------------------------|-----------------------------------------------------------------------------------------------------------------------------------------------------------------------------------------------------------------------------------------------------------------------------------------------------------------------------------------------------------------------------------------------------------------------------------------------------------------------------------------------------------------------------------------------------|
| Maraviroc      | CCR5 antagonists                                | <p>1) With drugs without interaction:<br/>300 mg 12/12h</p> <p>2) With interaction:<br/>150 mg 12/12h or 600 mg 12/12h</p> | <p>1) With drugs without interaction:<br/>2 - &lt;4 kg 30 mg 12/12h<br/>4 - &lt;6 kg 40 mg 12/12h<br/>6 - &lt;10 kg 100 mg 12/12h<br/>10 - &lt;14 kg 150 mg 12/12h<br/>14 - &lt;30 kg 200 mg 12/12h<br/>≥30 kg 300 mg 12/12h</p> <p>2) With interaction:<br/>Tablets<br/>10 - &lt;20 kg 50 mg 12/12h<br/>20 - &lt;30 kg 75 mg 12/12h<br/>30 - &lt; 40 kg 100 mg 12/12h<br/>≥40 kg 150 mg 12/12h</p> <p>Oral solution<br/>10 - &lt;20 kg 50 mg 12/12h<br/>20 - &lt;30 kg 80 mg 12/12h<br/>30 - &lt; 40 kg 100 mg 12/12h<br/>≥40 kg 150 mg 12/12h</p> |
| Nelfinavir     | Protease inhibitors                             | <p>750 mg 8/8h<br/>1250 mg 12/12h</p>                                                                                      | <p>Children ≥= 2 years</p> <p>1) By weight (mg/kg)<br/>45 - 55 mg/kg/dose 12/12h<br/>25 - 35 mg/kg/dose 8/8h</p> <p>2) By weight range<br/>10 - &lt;13 kg 500 mg 12/12h or 250 mg 8/8h<br/>13 - &lt;19 kg 750 mg 12/12h or 500 mg 8/8h<br/>19 - &lt;21 kg 1000 mg 12/12h or 500 mg 8/8h<br/>≥21 kg 1000 - 1250 mg 12/12h or 750 mg 8/8h</p>                                                                                                                                                                                                         |
| Nevirapine     | Non-nucleoside reverse transcriptase inhibitors | <p>Starting:<br/>200 mg/day/14 days</p> <p>Maintenance:<br/>200 mg 12/12h<br/>400 mg/d (extended-release)</p>              | <p>1) Children &lt;8 years<br/>200 mg/m<sup>2</sup>/dose/day for 14 days, after 12/12h<br/>or<br/>200 mg/m<sup>2</sup>/dose 12/12h</p> <p>2) Children ≥= 8 years<br/>120 - 150 mg/m<sup>2</sup>/dose/day for 14 days, after 12/12h</p> <p>3) Children ≥=6 years capable of ingesting an extended-release tablet<br/>0,58 - 0,83 m<sup>2</sup>: 200 mg/day<br/>0,84 - 1,16 m<sup>2</sup>: 300 mg/day<br/>≥1,17 m<sup>2</sup>: 400 mg/day</p> <p>4) Adolescent = adult</p>                                                                            |

**Table S2 – Antiretrovirals included in this review with the respective classes and doses (continuation)**

| Antiretroviral | Pharmacological class                           | Adult                                                                                                                                                                                                                                                                                                           | Child                                                                                                                                                                                                                                                                                                                                                                                                                                                                                                                                                                                                           |
|----------------|-------------------------------------------------|-----------------------------------------------------------------------------------------------------------------------------------------------------------------------------------------------------------------------------------------------------------------------------------------------------------------|-----------------------------------------------------------------------------------------------------------------------------------------------------------------------------------------------------------------------------------------------------------------------------------------------------------------------------------------------------------------------------------------------------------------------------------------------------------------------------------------------------------------------------------------------------------------------------------------------------------------|
| Raltegravir    | Integrase inhibitors                            | 400 mg 12/12h<br>1200 mg/day                                                                                                                                                                                                                                                                                    | 1) Oral suspension<br>By weight 6 mg/kg/dose 12/12h<br>By weight range<br>3 - <4 kg 25 mg 12/12h<br>4 - <6 kg 30 mg 12/12h<br>6 - <8 kg 40 mg 12/12h<br>8 - <11 kg 60 mg 12/12h<br>11 - <14 kg 80 mg 12/12h<br>14 - <20 kg 100 mg 12/12h<br>2) Chewable tablets<br>By weight 6 mg/kg/dose 12/12h<br>3 - <6 kg 25 mg 12/12h<br>6 - <10 kg 50 mg 12/12h<br>10 - <14 kg 75 mg 12/12h<br>14 - <20 kg 100 mg 12/12h<br>20 - <28 kg 150 mg 12/12h<br>28 - <40 kg 200 mg 12/12h<br>≥40 kg 300 mg 12/12h<br>3) Coated tablets<br>≥ 25 kg 400 mg 12/12h<br>≥ 40 kg 400 mg 12/12h ou 1200 mg/day                          |
| Rilpivirine    | Non-nucleoside reverse transcriptase inhibitors | 1) Oral<br>25 mg/day<br>2) Injectable (IM) with cabotegravir starting dose 900 mg maintenance dose 600 mg/month                                                                                                                                                                                                 | ≥ 12 years and ≥ 35 kg<br>1) Oral<br>25 mg/day<br>2) Injectable (IM) with cabotegravir starting dose 900 mg maintenance dose 600 mg/month                                                                                                                                                                                                                                                                                                                                                                                                                                                                       |
| Ritonavir      | Protease inhibitors                             | Isolated:<br>300 mg 12/12h, increased by 100 mg 12/12h every 2-3 days up to 600 mg 12/12h<br>In combination with another protease inhibitor:<br>- With atazanavir 100 mg/day<br>- With darunavir 100-200 mg/day<br>- With lopinavir 200 mg/day<br>- With tipranavir 400 mg/day<br>100 - 400 mg/day in 1-2 doses | 1) Children >1 month<br>250 mg/m <sup>2</sup> /dose 12/12h, increased by 50 mg/m <sup>2</sup> /dose 12/12h every 2-3 days up to 350 mg/m <sup>2</sup> /dose 12/12h<br>2) With atazanavir<br>15-19 kg 80-100 mg/day<br>≥ 20 kg 100 mg/day<br>3) With darunavir<br>15-29 kg 50 mg 12/12h<br>30-39 kg 60 mg 12/12h<br>≥ 40 kg 100 mg 12/12h<br>12-17 years with single dose darunavir<br>≥40 kg 100 mg/day<br>3) With fosamprenavir<br>25-32 kg 3 mg/kg/dose 12/12h<br>≥ 33 kg 100 mg 12/12h<br>4) With tipranavir<br>Children 2-11 years 150 mg/m <sup>2</sup> /dose 12/12h<br>Children 12-17 years 200 mg 12/12h |
| Saquinavir     | Protease inhibitors                             | 500 mg 12/12h/7 days, then 1000 mg 12/12h                                                                                                                                                                                                                                                                       | Children ≥ 2 years<br>5 - <40 kg 50 mg/kg/dose 12/12h<br>≥ 40 kg 1000 mg 12/12h                                                                                                                                                                                                                                                                                                                                                                                                                                                                                                                                 |



**Table S2 – Antiretrovirals included in this review with the respective classes and doses (continuation)**

| Antiretroviral                | Pharmacological class                                      | Adult                                                                                                                                                                                   | Child                                                                                                                                                                                                                                                                                                                                                                                                                                                                                                                                                                        |
|-------------------------------|------------------------------------------------------------|-----------------------------------------------------------------------------------------------------------------------------------------------------------------------------------------|------------------------------------------------------------------------------------------------------------------------------------------------------------------------------------------------------------------------------------------------------------------------------------------------------------------------------------------------------------------------------------------------------------------------------------------------------------------------------------------------------------------------------------------------------------------------------|
| Stavudine                     | Nucleoside and nucleotide reverse transcriptase inhibitors | <60 kg 30 mg 12/12h<br>≥ 60 kg 40 mg 12/12h                                                                                                                                             | < 30 kg 1 mg/kg/dose 12/12h<br>30 - <60 kg 30 mg 12/12h<br>≥ 60 kg 40 mg 12/12h                                                                                                                                                                                                                                                                                                                                                                                                                                                                                              |
| Tenofovir alafenamide         | Nucleoside and nucleotide reverse transcriptase inhibitors | 25 mg/day with bictegravir and emtricitabine; or rilpivirine and emtricitabine<br>10 mg/day with elvitegravir, cobicistat and emtricitabine; or darunavir, cobicistat and emtricitabine | 1) Children 12-17 kg<br>≥ 35 kg 25 mg/day<br>2) With bictegravir and emtricitabine<br>≥ 25 kg 25 mg/day<br>3) With rilpivirine e emtricitabine<br>≥ 35 kg 25 mg/day<br>4) With elvitegravir, cobicistat and emtricitabine<br>≥ 25 kg 10 mg/day<br>5) With darunavir, cobicistat and emtricitabine<br>≥ 40 kg 10 mg/day                                                                                                                                                                                                                                                       |
| Tenofovir disoproxil fumarate | Nucleoside and nucleotide reverse transcriptase inhibitors | 245 mg/day or 300 mg/day                                                                                                                                                                | Children ≥ 2 years<br>1) By weight (mg/kg)<br>≥ 10kg 8 mg/kg/dose/day<br>or 6,5 mg/kg/day<br>2) Oral powder<br>10 - <12 kg 80 mg/day<br>12 - <14 kg 100 mg/day<br>14 - <17 kg 120 mg/day<br>17 - <19 kg 140 mg/day<br>19 - <22 kg 160 mg/day<br>22 - <24 kg 180 mg/day<br>24 - <27 kg 200 mg/day<br>27 - <29 kg 220 mg/day<br>29 - <32 kg 240 mg/day<br>32 - <34 kg 260 mg/day<br>34 - <35 kg 280 mg/day<br>≥35 kg 300 mg/day<br>3) Tablet<br>17 - <22 kg 123 or 150 mg/day<br>22 - <28 kg: 163 or 200 mg/day<br>28 - <35 kg: 204 or 250 mg/day<br>≥35 kg: 245 or 300 mg/day |
| Tipranavir                    | Protease inhibitors                                        | 500 mg 12/12h (used in combination with ritonavir 200 mg 12/12h)                                                                                                                        | Children ≥ 2 years<br>By weight 14 mg/kg/dose 12/12h<br>By body surface 375 mg/m <sup>2</sup> /dose 12/12h<br>With ritonavir: 6 mg/kg/dose 12/12h                                                                                                                                                                                                                                                                                                                                                                                                                            |

**Table S2 – Antiretrovirals included in this review with the respective classes and doses (conclusion)**

| Antiretroviral | Pharmacological class                                      | Adult             | Child                                                                                                                                                                                                                                                                                                                                                                                                                     |
|----------------|------------------------------------------------------------|-------------------|---------------------------------------------------------------------------------------------------------------------------------------------------------------------------------------------------------------------------------------------------------------------------------------------------------------------------------------------------------------------------------------------------------------------------|
| Zidovudine     | Nucleoside and nucleotide reverse transcriptase inhibitors | 250-300 mg 12/12h | 1) By weight (mg/kg)<br><9 kg 12 mg/kg/dose 12/12h; 8 mg/kg/dose 8/8h<br>9 - <30 kg 9 mg/kg/dose 12/12h; 6 mg/kg/dose 8/8h<br>≥30 kg 300 mg 12/12h; 200 mg 8/8h<br>2) By weight range<br>8-13 kg 100 mg 12/12h<br>14-20 kg 100 mg/morning and 200 mg/night<br>21-27 kg 200 mg 12/12h<br>28-29 kg 200-250 mg 12/12h<br>≥ 30 kg 250-300 mg 12/12h<br>3) By body surface<br>160 or 180 or 240 mg/m <sup>2</sup> /dose 12/12h |
