# Supplementary material for: Rates of adverse events of antiretroviral therapy in women living with HIV/AIDS: a systematic review and meta-analysis
Source: PubMed Central journal article supplement — BMJ Open. 2024 Jul 31;14(7):e079292. doi: 10.1136/bmjopen-2023-079292 (PMC11293376; doi:10.1136/bmjopen-2023-079292), 2024-07-31
Supplement: bmjopen-14-7-s004.pdf [file bmjopen-14-7-s004.pdf]

## Primary and secondary outcomes

**Table S3 – Primary and secondary outcomes evaluated in this review**

---

### Primary outcomes

---

The number of participants with any adverse event and participants with ART-related adverse events (as defined in the studies):

- Discontinuation or dropouts/withdrawals of treatment;
  - Clinical and/or laboratory adverse events;
  - Clinical adverse events;
  - Laboratory adverse events.
- 

### Secondary outcomes

---

The number of participants with any adverse event and participants with ART-related adverse events (as defined in the studies):

- Grade 3 and/or 4 clinical and/or laboratory adverse events;
- Grade 3 and/or 4 clinical adverse events;
- Grade 3 and/or 4 laboratory adverse events;
- Grade 3 clinical and/or laboratory adverse events;
- Grade 3 clinical adverse events;
- Grade 3 laboratory adverse events;
- Grade 4 clinical and/or laboratory adverse events;
- Grade 4 clinical adverse events;
- Grade 4 laboratory adverse events;
- Serious clinical and/or laboratory adverse events;
- Serious clinical adverse events;
- Serious laboratory adverse events;
- Delay in puberty;
- Amenorrhea;
- Menstrual irregularity;
- Early menopause;
- Total with hot flashes;
- Total with severe hot flushes;
- Total with moderate hot flashes;
- Total with light hot flashes;
- Total with severe/moderate hot flashes;
- Total with moderate/light hot flashes;
- Osteopenia;
- Osteoporosis;
- General fractures due to osteoporosis;
- Vertebral fractures due to osteoporosis;
- Non-vertebral fractures due to osteoporosis;
- Wrist fractures due to osteoporosis;
- Hip fractures due to osteoporosis;
- Hospitalization for adverse events.

Death from all causes;

ART-related death.

---
