# Supplementary material for: Rates of adverse events of antiretroviral therapy in women living with HIV/AIDS: a systematic review and meta-analysis
Source: PubMed Central journal article supplement — BMJ Open. 2024 Jul 31;14(7):e079292. doi: 10.1136/bmjopen-2023-079292 (PMC11293376; doi:10.1136/bmjopen-2023-079292), 2024-07-31
Supplement: bmjopen-14-7-s006.pdf [file bmjopen-14-7-s006.pdf]

## Excluded studies

**Table S4 – List of excluded studies by exclusion reason (to be continued)**

| Studies excluded because they were not randomized controlled clinical trials or performed a joint analysis of two or more clinical trials |                                |      |                                                                                                                                                  |
|-------------------------------------------------------------------------------------------------------------------------------------------|--------------------------------|------|--------------------------------------------------------------------------------------------------------------------------------------------------|
| Amount                                                                                                                                    | First author or research group | Year | Title                                                                                                                                            |
| 1                                                                                                                                         | Walker                         | 1988 | Anemia and erythropoiesis in patients with the acquired immunodeficiency syndrome (AIDS) and Kaposi sarcoma treated with zidovudine              |
| 2                                                                                                                                         | Richman                        | 1988 | Results of continued monitoring of participants in the placebo-controlled trial of zidovudine for serious human immunodeficiency virus infection |
| 3                                                                                                                                         | Gelmon                         | 1989 | Nature, time course and dose dependence of zidovudine-related side effects: results from the Multicenter Canadian Azidothymidine Trial           |
| 4                                                                                                                                         | Lindley                        | 1989 | AIDS: AZT for children in extended US trial                                                                                                      |
| 5                                                                                                                                         | Hooker                         | 1990 | Antiretroviral therapy and the use of zidovudine for HIV infection                                                                               |
| 6                                                                                                                                         | Levitt                         | 1990 | Psychogenic panic after zidovudine therapy: The therapeutic benefit of an N of 1 trial                                                           |
| 7                                                                                                                                         | Skowron                        | 1990 | Phase II trial of alternating and intermittent regimens of zidovudine (ZDV) and 2',3'-dideoxycytidine (ddC) in ARC and AIDS                      |
| 8                                                                                                                                         | NR                             | 1990 | Zidovudine for symptomless HIV infection                                                                                                         |
| 9                                                                                                                                         | McKinney                       | 1991 | A multicenter trial of oral zidovudine in children with advanced human immunodeficiency virus disease. The Protocol 043 Study Group              |
| 10                                                                                                                                        | Butler                         | 1991 | Drug trial benefited HIV children                                                                                                                |
| 11                                                                                                                                        | Darbyshire                     | 1992 | Didanosine for zidovudine-intolerant patients with HIV disease                                                                                   |
| 12                                                                                                                                        | Seidlin                        | 1992 | Pancreatitis and pancreatic dysfunction in patients taking dideoxyinosine                                                                        |
| 13                                                                                                                                        | Collier                        | 1993 | Combination therapy with zidovudine and didanosine compared with zidovudine alone in HIV-1 infection                                             |
| 14                                                                                                                                        | Williams                       | 1993 | Pharmacokinetics of 2-fluorodideoxycytidine (2FddC) in patients infected with human immunodeficiency virus                                       |
| 15                                                                                                                                        | Dayan                          | 1993 | A comparison of the toxicity and efficacy of two doses of dideoxycytidine (ddC) in patients with AIDS or AIDS related complex (ARC)              |
| 16                                                                                                                                        | NR                             | 1993 | ddI trial results reported                                                                                                                       |
| 17                                                                                                                                        | Lüthy                          | 1994 | [Antiretroviral therapy. Current status and perspectives]                                                                                        |
| 18                                                                                                                                        | NR                             | 1994 | L-697,661 trial results                                                                                                                          |
| 19                                                                                                                                        | Choo                           | 1995 | Combination superior to zidovudine in Delta trial                                                                                                |
| 20                                                                                                                                        | Montaner                       | 1995 | The safety profile of stavudine (d4T) in advanced HIV infection-experience from the Canadian expanded access program (EAP)                       |
| 21                                                                                                                                        | Pollard                        | 1995 | Safety of Didanosine plus Stavudine Combination Therapy in HIV-infected Subjects in a Pilot Randomized Double-blinded Trial                      |
| 22                                                                                                                                        | Soo                            | 1995 | Inter-Company Collaboration Combination Trials. Clinical Trial Subcommittee of the Inter-Company Collaboration for AIDS Drug Development         |
| 23                                                                                                                                        | Mulder                         | 1995 | [Clinical effectiveness of zidovudine]                                                                                                           |
| 24                                                                                                                                        | NR                             | 1995 | Anti-HIV therapy lowers risk of AIDS, death in patients with intermediate-stage HIV disease                                                      |
| 25                                                                                                                                        | Blum                           | 1996 | Low-dose zalcitabine-related toxic neuropathy: frequency, natural history, and risk factors                                                      |
| 26                                                                                                                                        | Wachsmann                      | 1996 | Pharmacokinetics, safety and bioavailability of HPMPC (cidofovir) in human immunodeficiency virus-infected subjects                              |
| 27                                                                                                                                        | James                          | 1996 | Ritonavir (Abbott protease inhibitor) proves survival benefit in late-stage AIDS                                                                 |

**Table S4 – List of excluded studies by exclusion reason (continuation)**

| Studies excluded because they were not randomized controlled clinical trials or performed a joint analysis of two or more clinical trials |                                |      |                                                                                                                                                                                                                                                                 |
|-------------------------------------------------------------------------------------------------------------------------------------------|--------------------------------|------|-----------------------------------------------------------------------------------------------------------------------------------------------------------------------------------------------------------------------------------------------------------------|
| Amount                                                                                                                                    | First author or research group | Year | Title                                                                                                                                                                                                                                                           |
| 28                                                                                                                                        | Jablonowski                    | 1996 | [Antiretroviral therapy in HIV infection]                                                                                                                                                                                                                       |
| 29                                                                                                                                        | Randall                        | 1996 | CPCRA 007: preliminary results of combination antiretroviral study                                                                                                                                                                                              |
| 30                                                                                                                                        | NR                             | 1996 | Mortality reduced by ritonavir                                                                                                                                                                                                                                  |
| 31                                                                                                                                        | NR                             | 1996 | Ritonavir increases lymphocyte subsets                                                                                                                                                                                                                          |
| 32                                                                                                                                        | NR                             | 1996 | Saquinavir for treatment of patients with HIV                                                                                                                                                                                                                   |
| 33                                                                                                                                        | d'Arminio Monforte             | 1997 | Italian multicentre study of didanosine compassionate use in advanced HIV infection. Italian BMS-906 Study Group                                                                                                                                                |
| 34                                                                                                                                        | Villalba                       | 1997 | Safety and efficacy of two different triple drug combinations in which either lamivudine or didanosine were administered with stavudine plus indinavir                                                                                                          |
| 35                                                                                                                                        | NR                             | 1997 | Final CESARE trial results show continued clinical and survival benefit                                                                                                                                                                                         |
| 36                                                                                                                                        | NR                             | 1997 | d4T and ddI shown to be safe and effective                                                                                                                                                                                                                      |
| 37                                                                                                                                        | NR                             | 1997 | Anti-HIV effects of nelfinavir reported after ten months of combination therapy                                                                                                                                                                                 |
| 38                                                                                                                                        | NR                             | 1997 | Clinical trial results of GEM91 show activity against advance HIV                                                                                                                                                                                               |
| 39                                                                                                                                        | Breckenridge                   | 1997 | Antiretroviral drug trials                                                                                                                                                                                                                                      |
| 40                                                                                                                                        | NR                             | 1997 | More new drugs for HIV and associated infections                                                                                                                                                                                                                |
| 41                                                                                                                                        | Cato                           | 1998 | Pharmacokinetic interaction between ritonavir and didanosine when administered concurrently to HIV-infected patients                                                                                                                                            |
| 42                                                                                                                                        | Bradbeer                       | 1998 | Ritonavir reduced AIDS complications and risk for death in HIV-1 infection                                                                                                                                                                                      |
| 43                                                                                                                                        | Mayers                         | 1998 | A double-blind, placebo-controlled study to assess the safety, tolerability and antiretroviral activity of efavirenz (EFV, Sustiva, DMP 266) in combination with open-label zidovudine and lamivudine in HIV-1 infected patients. Presented at: XIII Internatio |
| 44                                                                                                                                        | Ruxrungtham                    | 1998 | HIV-NAT 002: a randomized, open-label study to explore the antiretroviral efficacy and tolerability of immediate vs deferred switching from ddI/d4t to AZT in a Thai HIV-1 infected population pretreated with ddI/d4t                                          |
| 45                                                                                                                                        | Gürtler                        | 1998 | [AIDS triple therapy. The gap between viral load and side effects]                                                                                                                                                                                              |
| 46                                                                                                                                        | Reijers                        | 1998 | [Amsterdam duration of antiretroviral medication (ADAM)--study: induction-suppression treatment in HIV-I infection, preliminary results]                                                                                                                        |
| 47                                                                                                                                        | Hudson                         | 1999 | HIVNET nevirapine trials                                                                                                                                                                                                                                        |
| 48                                                                                                                                        | Kline                          | 1999 | Combination therapy with stavudine (d4T) plus didanosine (ddI) in children with human immunodeficiency virus infection. The Pediatric AIDS Clinical Trials Group 327 Team                                                                                       |
| 49                                                                                                                                        | NR                             | 1999 | T-20: 5-drug combination trial for heavily treated NNRTI-naive patients now recruiting                                                                                                                                                                          |
| 50                                                                                                                                        | NR                             | 1999 | Amprenavir: a new HIV protease inhibitor                                                                                                                                                                                                                        |
| 51                                                                                                                                        | NR                             | 1999 | Zidovudine + lamivudine                                                                                                                                                                                                                                         |
| 52                                                                                                                                        | Gazzard                        | 2000 | Relative potencies of protease inhibitors                                                                                                                                                                                                                       |
| 53                                                                                                                                        | Cherry                         | 2000 | Deaths bring South African HIV drug trials to a premature halt                                                                                                                                                                                                  |
| 54                                                                                                                                        | Cotton                         | 2000 | Antiretroviral therapy in children - Increased benefit from increased complexity                                                                                                                                                                                |
| 55                                                                                                                                        | Gulick                         | 2000 | 3-year suppression of HIV viremia with indinavir, zidovudine, and lamivudine                                                                                                                                                                                    |
| 56                                                                                                                                        | NR                             | 2000 | Lopinavir/ritonavir. (Kaletra)                                                                                                                                                                                                                                  |
| 57                                                                                                                                        | NR                             | 2000 | Anti-HIV agents. Efavirenz versus indinavir: who really wins?                                                                                                                                                                                                   |
| 58                                                                                                                                        | van der Valk                   | 2001 | Increased risk of lipodystrophy when nucleoside analogue reverse transcriptase inhibitors are included with protease inhibitors in the treatment of HIV-1 infection                                                                                             |

**Table S4 – List of excluded studies by exclusion reason (continuation)**

| Studies excluded because they were not randomized controlled clinical trials or performed a joint analysis of two or more clinical trials |                                |      |                                                                                                                                                                                                       |
|-------------------------------------------------------------------------------------------------------------------------------------------|--------------------------------|------|-------------------------------------------------------------------------------------------------------------------------------------------------------------------------------------------------------|
| Amount                                                                                                                                    | First author or research group | Year | Title                                                                                                                                                                                                 |
| 59                                                                                                                                        | Katzenstein                    | 2001 | Virologic and CD4 cell response to zidovudine or zidovudine and lamivudine following didanosine treatment of human immunodeficiency virus infection                                                   |
| 60                                                                                                                                        | Foudraine                      | 2001 | Durable HIV-1 suppression with indinavir after failing lamivudine-containing double nucleoside therapy: a randomized controlled trial                                                                 |
| 61                                                                                                                                        | Kunches                        | 2001 | Tolerability of enteric-coated didanosine capsules compared with didanosine tablets in adults with HIV infection                                                                                      |
| 62                                                                                                                                        | Moreno                         | 2001 | Long-term outcomes of protease inhibitor-based therapy in antiretroviral treatment-naïve HIV-infected injection drug users on methadone maintenance programmes                                        |
| 63                                                                                                                                        | Wensing                        | 2001 | Replacing ritonavir by nelfinavir or nelfinavir/saquinavir as part of highly active antiretroviral therapy leads to an improvement of triglyceride levels                                             |
| 64                                                                                                                                        | Huff                           | 2001 | Tenacious tenofovir struts its stuff in a virtual ICAAC                                                                                                                                               |
| 65                                                                                                                                        | Dat                            | 2001 | Outcomes of a trial of HIV-1 immunogen in patients with HIV infection [1] mutiple letters                                                                                                             |
| 66                                                                                                                                        | NR                             | 2001 | [HIV management requires strategic planning. Optimal sequencing of protease inhibitors]                                                                                                               |
| 67                                                                                                                                        | NR                             | 2001 | [On the path to "e-HAART"? Glimpse at salvage therapy]                                                                                                                                                |
| 68                                                                                                                                        | NR                             | 2001 | [Progress in HIV therapy. Effective and simple therapy with efavirenz]                                                                                                                                |
| 69                                                                                                                                        | NR                             | 2001 | [Positive change from protease inhibitor to non-nucleoside reverse transcriptase inhibitor efavirenz. Improved virus control thanks to protease inhibitor switch]                                     |
| 70                                                                                                                                        | NR                             | 2001 | [Results of the AIDS-In-Europe Study. Non-nucleoside reverse transcriptase inhibitor does not equal non-nucleoside reverse transcriptase inhibitor]                                                   |
| 71                                                                                                                                        | Giles                          | 2001 | T-20 phase III studies underway                                                                                                                                                                       |
| 72                                                                                                                                        | NR                             | 2001 | Switching to nevirapine--results after one year                                                                                                                                                       |
| 73                                                                                                                                        | PENTA                          | 2002 | Comparison of dual nucleoside-analogue reverse-transcriptase inhibitor regimens with and without nelfinavir in children with HIV-1 who have not previously been treated: the PENTA 5 randomised trial |
| 74                                                                                                                                        | Yogev                          | 2002 | Stavudine, nevirapine and ritonavir in stable antiretroviral therapy-experienced children with human immunodeficiency virus infection                                                                 |
| 75                                                                                                                                        | Cheer                          | 2002 | Stavudine once daily                                                                                                                                                                                  |
| 76                                                                                                                                        | Chêne                          | 2002 | Role of long-term nucleoside-analogue therapy in lipodystrophy and metabolic disorders in human immunodeficiency virus-infected patients                                                              |
| 77                                                                                                                                        | Voigt                          | 2002 | First-line ritonavir/indinavir 100/800 mg twice daily plus nucleoside reverse transcriptase inhibitors in a German multicentre study: 48-week results                                                 |
| 78                                                                                                                                        | Gaytan                         | 2002 | Evaluation of the efficacy of two antiretroviral triple-drug therapy with indinavir or saquinavir in HIV-infected patients without previous treatment                                                 |
| 79                                                                                                                                        | Greub                          | 2002 | Intermittent and sustained low-level HIV viral rebound in patients receiving potent antiretroviral therapy                                                                                            |
| 80                                                                                                                                        | Valer                          | 2002 | Impact of HIV genotyping and drug levels on the response to salvage therapy with saquinavir/ritonavir                                                                                                 |
| 81                                                                                                                                        | NR                             | 2002 | NEAT trial releases results                                                                                                                                                                           |
| 82                                                                                                                                        | James                          | 2002 | Lipoatrophy and antiretroviral drug changes                                                                                                                                                           |
| 83                                                                                                                                        | NR                             | 2002 | Atazanavir demonstrates antiviral efficacy and a favorable lipid profile at 48 weeks                                                                                                                  |
| 84                                                                                                                                        | NR                             | 2002 | [New protease inhibitor atazanavir. Simple administration--less resistance]                                                                                                                           |

**Table S4 – List of excluded studies by exclusion reason (continuation)**

| Studies excluded because they were not randomized controlled clinical trials or performed a joint analysis of two or more clinical trials |                                |      |                                                                                                                                                                                                                                        |
|-------------------------------------------------------------------------------------------------------------------------------------------|--------------------------------|------|----------------------------------------------------------------------------------------------------------------------------------------------------------------------------------------------------------------------------------------|
| Amount                                                                                                                                    | First author or research group | Year | Title                                                                                                                                                                                                                                  |
| 85                                                                                                                                        | NR                             | 2002 | [Simple, safe and effective. New protease inhibitor means progress]                                                                                                                                                                    |
| 86                                                                                                                                        | Cao                            | 2002 | [A clinical trial using zidovudine and lamivudine plus indinavir triple therapy in Chinese individuals with human immunodeficiency virus infection]                                                                                    |
| 87                                                                                                                                        | Hirsch                         | 2003 | Long-term efficacy, safety, and tolerability of indinavir-based therapy in protease inhibitor-naïve adults with advanced HIV infection                                                                                                 |
| 88                                                                                                                                        | Coplan                         | 2003 | Incidence of myocardial infarction in randomized clinical trials of protease inhibitor-based antiretroviral therapy: an analysis of four different protease inhibitors                                                                 |
| 89                                                                                                                                        | Greenberg                      | 2003 | Long-term efficacy and safety of twice-daily saquinavir soft gelatin capsules (SGC), with or without nelfinavir, and three times daily saquinavir-SGC, in triple combination therapy for HIV infection: 100-week follow-up             |
| 90                                                                                                                                        | Hammer                         | 2003 | A randomized trial of nelfinavir and abacavir in combination with efavirenz and adefovir dipivoxil in HIV-1-infected persons with virological failure receiving indinavir                                                              |
| 91                                                                                                                                        | Tashima                        | 2003 | Lipid changes in patients initiating efavirenz- and indinavir-based antiretroviral regimens                                                                                                                                            |
| 92                                                                                                                                        | Murphy                         | 2003 | Reviving protease inhibitors: new data and more options                                                                                                                                                                                |
| 93                                                                                                                                        | Amin                           | 2003 | Combined analysis of two-year follow-up from two open-label randomized trials comparing efficacy of three nucleoside reverse transcriptase inhibitor backbones for previously untreated HIV-1 infection: OzCombo 1 and 2               |
| 94                                                                                                                                        | Moyle                          | 2003 | Double "d" drug danger                                                                                                                                                                                                                 |
| 95                                                                                                                                        | Katlama                        | 2003 | Comparison of metabolic abnormalities 48 weeks after switching from highly active antiretroviral therapy containing a non-nucleoside reverse transcriptase inhibitor to Trizivir versus continued highly active antiretroviral therapy |
| 96                                                                                                                                        | Moyle                          | 2003 | Abacavir plus lamivudine: a thymidine analogue-sparing NRTI backbone                                                                                                                                                                   |
| 97                                                                                                                                        | Bartlett                       | 2003 | Early intensification with abacavir in subjects at high risk for incomplete viral suppression                                                                                                                                          |
| 98                                                                                                                                        | Zheng                          | 2003 | A short-term trial of didanosine, stavudine, and nevirapine combination therapy for human immunodeficiency virus infection                                                                                                             |
| 99                                                                                                                                        | Bartlett                       | 2003 | Atazanavir: clinical use                                                                                                                                                                                                               |
| 100                                                                                                                                       | Moyle                          | 2003 | Protease inhibitor-sparing regimens: new evidence strengthens position                                                                                                                                                                 |
| 101                                                                                                                                       | NR                             | 2003 | [Enduringly effective and tolerable initial therapy of HIV. Even after 5 years no resistance]                                                                                                                                          |
| 102                                                                                                                                       | NR                             | 2003 | [Results of a large randomized study: after switch to LPV/r quality of life improved]                                                                                                                                                  |
| 103                                                                                                                                       | Pfeiffer                       | 2003 | One major HIV drug combo fails in trial, others succeed                                                                                                                                                                                |
| 104                                                                                                                                       | Wang                           | 2004 | Pharmacokinetics and Safety of Single Oral Doses of Emtricitabine in Human Immunodeficiency Virus-Infected Children                                                                                                                    |
| 105                                                                                                                                       | Hudson                         | 2004 | HIVNET 012 and Petra                                                                                                                                                                                                                   |
| 106                                                                                                                                       | Hicks                          | 2004 | Long-term safety and durable antiretroviral activity of lopinavir/ritonavir in treatment-naïve patients: 4 year follow-up study                                                                                                        |
| 107                                                                                                                                       | Badía                          | 2004 | Health-related quality of life in HIV patients switching to twice-daily indinavir/ritonavir regimen or continuing with three-times-daily indinavir-based therapy                                                                       |
| 108                                                                                                                                       | MacArthur                      | 2004 | Efficacy and safety of abacavir plus lamivudine versus didanosine plus stavudine when combined with a protease inhibitor, a nonnucleoside reverse transcriptase inhibitor, or both in HIV-1 positive antiretroviral-naïve persons      |

**Table S4 – List of excluded studies by exclusion reason (continuation)**

| Studies excluded because they were not randomized controlled clinical trials or performed a joint analysis of two or more clinical trials |                                |      |                                                                                                                                                                                                                  |
|-------------------------------------------------------------------------------------------------------------------------------------------|--------------------------------|------|------------------------------------------------------------------------------------------------------------------------------------------------------------------------------------------------------------------|
| Amount                                                                                                                                    | First author or research group | Year | Title                                                                                                                                                                                                            |
| 109                                                                                                                                       | Ruane                          | 2004 | Safety/Tolerability and Efficacy of Abacavir-Containing Combination Therapy in HIV-1-Infected Adults in a Clinical Practice Setting: Results of ZORRO                                                            |
| 110                                                                                                                                       | Wood                           | 2004 | Long-term efficacy and safety of atazanavir with stavudine and lamivudine in patients previously treated with nelfinavir or atazanavir                                                                           |
| 111                                                                                                                                       | Arranz-Caso                    | 2004 | Treatment of HIV-infected patients with a combination of efavirenz, nevirapine and nucleoside reverse transcriptase inhibitors                                                                                   |
| 112                                                                                                                                       | Cahn                           | 2004 | Atazanavir--a once-daily HIV protease inhibitor that does not cause dyslipidemia in newly treated patients: results from two randomized clinical trials                                                          |
| 113                                                                                                                                       | Voigt                          | 2004 | Safety, efficacy and development of resistance under the new protease inhibitor lopinavir/ritonavir: 48-week results                                                                                             |
| 114                                                                                                                                       | Henry                          | 2004 | C-Reactive protein levels over time and cardiovascular risk in HIV-infected individuals suppressed on an indinavir-based regimen: AIDS Clinical Trials Group 5056s                                               |
| 115                                                                                                                                       | Huff                           | 2004 | Boosted Reyataz: 48-week results                                                                                                                                                                                 |
| 116                                                                                                                                       | Baylor                         | 2004 | Hepatotoxicity associated with nevirapine use                                                                                                                                                                    |
| 117                                                                                                                                       | Raffi                          | 2004 | [Clinical efficacy and tolerance of enfuvirtide (Fuzeon), new antiretroviral inhibitors of intracellular penetration of human immunodeficiency virus (HIV) type 1]                                               |
| 118                                                                                                                                       | NR                             | 2004 | [Long-term tolerance. Favorable lipid profile--favorable effect on development of lipodystrophy?]                                                                                                                |
| 119                                                                                                                                       | NR                             | 2004 | [3 years' data of tenofovir. Confirmed as a valuable building block]                                                                                                                                             |
| 120                                                                                                                                       | NR                             | 2004 | [Atazanavir protects lipid metabolism. New PI with favorable metabolic profile]                                                                                                                                  |
| 121                                                                                                                                       | NR                             | 2004 | [Approval of a new nucleoside. Component of complete once daily regimen]                                                                                                                                         |
| 122                                                                                                                                       | NR                             | 2004 | [CROI--presentation of new study results. In a comparison of NNRTI nevirapine is equally effective]                                                                                                              |
| 123                                                                                                                                       | NR                             | 2004 | Tenofovir: For first-line antiretroviral therapy: Wait and see                                                                                                                                                   |
| 124                                                                                                                                       | NR                             | 2004 | Anti-HIV agents. Once-daily lopinavir/ritonavir (Kaletra)                                                                                                                                                        |
| 125                                                                                                                                       | NR                             | 2004 | Complications & side effects. Clinical trial compares three face fillers                                                                                                                                         |
| 126                                                                                                                                       | Dubé                           | 2005 | Glucose metabolism, lipid, and body fat changes in antiretroviral-naive subjects randomized to nelfinavir or efavirenz plus dual nucleosides                                                                     |
| 127                                                                                                                                       | Fisac                          | 2005 | Metabolic benefits 24 months after replacing a protease inhibitor with abacavir, efavirenz or nevirapine                                                                                                         |
| 128                                                                                                                                       | Johnson                        | 2005 | Atazanavir plus ritonavir or saquinavir, and lopinavir/ritonavir in patients experiencing multiple virological failures                                                                                          |
| 129                                                                                                                                       | Thompson                       | 2005 | Short-term safety and pharmacodynamics of amdoxovir in HIV-infected patients                                                                                                                                     |
| 130                                                                                                                                       | Clifford                       | 2005 | Impact of efavirenz on neuropsychological performance and symptoms in HIV-infected individuals                                                                                                                   |
| 131                                                                                                                                       | Kappelhoff                     | 2005 | Are adverse events of nevirapine and efavirenz related to plasma concentrations?                                                                                                                                 |
| 132                                                                                                                                       | Mootsikapun                    | 2005 | Efficacy and safety of indinavir/ritonavir 400/100 mg twice daily plus two nucleoside analogues in treatment-naive HIV-1-infected patients with CD4+ T-cell counts <200 cells/mm <sup>3</sup> : 96-week outcomes |
| 133                                                                                                                                       | Maggiolo                       | 2005 | Quadruple-drug induction HAART in advanced HIV infection                                                                                                                                                         |
| 134                                                                                                                                       | Trottier                       | 2005 | Safety of enfuvirtide in combination with an optimized background of antiretrovirals in treatment-experienced HIV-1-infected adults over 48 weeks                                                                |
| 135                                                                                                                                       | NR                             | 2005 | Tipranavir favored in RESIST-2                                                                                                                                                                                   |

**Table S4 – List of excluded studies by exclusion reason (continuation)**

| Studies excluded because they were not randomized controlled clinical trials or performed a joint analysis of two or more clinical trials |                                |      |                                                                                                                                                                                                                                                                                                                                                                                 |
|-------------------------------------------------------------------------------------------------------------------------------------------|--------------------------------|------|---------------------------------------------------------------------------------------------------------------------------------------------------------------------------------------------------------------------------------------------------------------------------------------------------------------------------------------------------------------------------------|
| Amount                                                                                                                                    | First author or research group | Year | Title                                                                                                                                                                                                                                                                                                                                                                           |
| 136                                                                                                                                       | Moyle                          | 2005 | The impact of abacavir on lipids and lipodystrophy                                                                                                                                                                                                                                                                                                                              |
| 137                                                                                                                                       | Zhou                           | 2005 | A one-year clinical trial using didanosine, stavudine and nevirapine for highly active antiretroviral therapy                                                                                                                                                                                                                                                                   |
| 138                                                                                                                                       | NR                             | 2005 | Investigational protease inhibitor meets trial goal                                                                                                                                                                                                                                                                                                                             |
| 139                                                                                                                                       | Hicks                          | 2006 | Durable efficacy of tipranavir-ritonavir in combination with an optimised background regimen of antiretroviral drugs for treatment-experienced HIV-1-infected patients at 48 weeks in the Randomized Evaluation of Strategic Intervention in multi-drug reSistant patients with Tipranavir (RESIST) studies: an analysis of combined data from two randomised open-label trials |
| 140                                                                                                                                       | Mulligan                       | 2006 | Mixed patterns of changes in central and peripheral fat following initiation of antiretroviral therapy in a randomized trial                                                                                                                                                                                                                                                    |
| 141                                                                                                                                       | Gandhi                         | 2006 | Effect of baseline- and treatment-related factors on immunologic recovery after initiation of antiretroviral therapy in HIV-1-positive subjects: Results from ACTG 384                                                                                                                                                                                                          |
| 142                                                                                                                                       | Bellon                         | 2006 | Antiretroviral activity and safety of lopinavir/ritonavir in protease inhibitor-experienced HIV-infected children with severe-moderate immunodeficiency                                                                                                                                                                                                                         |
| 143                                                                                                                                       | Castillo                       | 2006 | Long-term safety and tolerability of the lamivudine/abacavir combination as components of highly active antiretroviral therapy                                                                                                                                                                                                                                                  |
| 144                                                                                                                                       | Maggiolo                       | 2006 | The Trivacan study                                                                                                                                                                                                                                                                                                                                                              |
| 145                                                                                                                                       | Llibre                         | 2006 | Sustained improvement of dyslipidaemia in HAART-treated patients replacing stavudine with tenofovir                                                                                                                                                                                                                                                                             |
| 146                                                                                                                                       | Dwyer                          | 2006 | Enfuvirtide in HIV-1-infected individuals changing therapy to a nucleoside reverse transcriptase inhibitor sparing regimen: the ALLIANCE Study                                                                                                                                                                                                                                  |
| 147                                                                                                                                       | NR                             | 2006 | Better lipid profile for Invirase                                                                                                                                                                                                                                                                                                                                               |
| 148                                                                                                                                       | Dzwonek                        | 2006 | Body fat changes and lipodystrophy in HIV-infected children: impact of highly active antiretroviral therapy                                                                                                                                                                                                                                                                     |
| 149                                                                                                                                       | Zhou                           | 2006 | Highly active antiretroviral treatment containing efavirenz or nevirapine and related toxicity in the TREAT Asia HIV Observational Database                                                                                                                                                                                                                                     |
| 150                                                                                                                                       | Tebas                          | 2007 | Switching to a protease inhibitor-containing, nucleoside-sparing regimen (lopinavir/ritonavir plus efavirenz) increases limb fat but raises serum lipid levels: results of a prospective randomized trial (AIDS clinical trial group 5125s)                                                                                                                                     |
| 151                                                                                                                                       | Boffito                        | 2007 | Pharmacokinetics and antiretroviral response to darunavir/ritonavir and etravirine combination in patients with high-level viral resistance                                                                                                                                                                                                                                     |
| 152                                                                                                                                       | Reynes                         | 2007 | TORO: ninety-six-week virologic and immunologic response and safety evaluation of enfuvirtide with an optimized background of antiretrovirals                                                                                                                                                                                                                                   |
| 153                                                                                                                                       | Cassetti                       | 2007 | The safety and efficacy of tenofovir DF in combination with lamivudine and efavirenz through 6 years in antiretroviral-naïve HIV-1-infected patients                                                                                                                                                                                                                            |
| 154                                                                                                                                       | Madrugá                        | 2007 | The safety and efficacy of switching stavudine to tenofovir df in combination with lamivudine and efavirenz in hiv-1-infected patients: three-year follow-up after switching therapy                                                                                                                                                                                            |
| 155                                                                                                                                       | Martínez                       | 2007 | Three-year follow-up of protease inhibitor-based regimen simplification in HIV-infected patients                                                                                                                                                                                                                                                                                |
| 156                                                                                                                                       | Raguin                         | 2007 | Salvage therapy with amprenavir, lopinavir and ritonavir is durably potent in HIV-infected patients in virological failure: 1-year results                                                                                                                                                                                                                                      |
| 157                                                                                                                                       | NR                             | 2007 | Trial of tipranavir versus darunavir in treatment-experienced patients enrolling                                                                                                                                                                                                                                                                                                |

**Table S4 – List of excluded studies by exclusion reason (continuation)**

| Studies excluded because they were not randomized controlled clinical trials or performed a joint analysis of two or more clinical trials |                                |      |                                                                                                                                                                                    |
|-------------------------------------------------------------------------------------------------------------------------------------------|--------------------------------|------|------------------------------------------------------------------------------------------------------------------------------------------------------------------------------------|
| Amount                                                                                                                                    | First author or research group | Year | Title                                                                                                                                                                              |
| 158                                                                                                                                       | NR                             | 2007 | Tipranavir demonstrates potent and durable treatment response in HIV-positive women                                                                                                |
| 159                                                                                                                                       | NR                             | 2007 | 48-week data on raltegravir in naive patients                                                                                                                                      |
| 160                                                                                                                                       | NR                             | 2007 | Maraviroc reduces viral load in naive patients at 48 weeks                                                                                                                         |
| 161                                                                                                                                       | Vispo                          | 2007 | SPRING: a new trial to evaluate tipranavir in heterogeneous treatment-experienced HIV populations                                                                                  |
| 162                                                                                                                                       | Truchis                        | 2007 | Long-term control of viral residual replication under maintenance therapy with Trizivir after a quadruple induction regimen in HIV-1-infected adults (suburbs trial) [1]           |
| 163                                                                                                                                       | Bernard                        | 2007 | 48-week study results show DRV's staying power                                                                                                                                     |
| 164                                                                                                                                       | Ndegwa                         | 2007 | Maraviroc (Celsentri) for multidrug-resistant human immunodeficiency virus (HIV)-1                                                                                                 |
| 165                                                                                                                                       | Winckler                       | 2007 | [A clinical study with an HIV integrase inhibitor]                                                                                                                                 |
| 166                                                                                                                                       | NR                             | 2007 | Side effects and complications. Tesamorelin--results from Phase III                                                                                                                |
| 167                                                                                                                                       | NR                             | 2007 | Complications and side effects. Bone changes after starting HAART                                                                                                                  |
| 168                                                                                                                                       | Peters                         | 2008 | Antiretroviral therapy improves renal function among HIV-infected Ugandans                                                                                                         |
| 169                                                                                                                                       | Gulick                         | 2008 | Maraviroc for previously treated patients with R5 HIV-1 infection                                                                                                                  |
| 170                                                                                                                                       | Ananworanich                   | 2008 | Changes in metabolic toxicity after switching from stavudine/didanosine to tenofovir/lamivudine--a Staccato trial substudy                                                         |
| 171                                                                                                                                       | Cutrell                        | 2008 | Abacavir and the potential risk of myocardial infarction                                                                                                                           |
| 172                                                                                                                                       | Soriano                        | 2008 | Efficacy and safety of replacing lopinavir with atazanavir in HIV-infected patients with undetectable plasma viraemia: final results of the SLOAT trial                            |
| 173                                                                                                                                       | Steigbigel                     | 2008 | Raltegravir with optimized background therapy for resistant HIV-1 infection                                                                                                        |
| 174                                                                                                                                       | Stein                          | 2008 | Lipoprotein Changes in HIV-Infected Antiretroviral-Naïve Individuals after Starting Antiretroviral Therapy: ACTG Study A5152s Stein: Lipoprotein Changes on Antiretroviral Therapy |
| 175                                                                                                                                       | Kottlilil                      | 2008 | AIDS Clinical Trials Group (ACTG) A5095 study team. Three- vs four-drug antiretroviral regimens for the initial treatment of HIV-1 infection: A randomized controlled trial        |
| 176                                                                                                                                       | Landovitz                      | 2008 | Phase II study of vicriviroc versus efavirenz (both with zidovudine/lamivudine) in treatment-naïve subjects with HIV-1 infection                                                   |
| 177                                                                                                                                       | Lapadula                       | 2008 | Risk of early virological failure of once-daily tenofovir-emtricitabine plus twice-daily nevirapine in antiretroviral therapy-naïve HIV-infected patients                          |
| 178                                                                                                                                       | Gallant                        | 2008 | The 3-year renal safety of a tenofovir disoproxil fumarate vs. a thymidine analogue-containing regimen in antiretroviral-naïve patients                                            |
| 179                                                                                                                                       | Curran                         | 2008 | [Darunavir as first-line therapy. The TITAN study]                                                                                                                                 |
| 180                                                                                                                                       | Estrada                        | 2008 | [Darunavir in treatment-naïve patients. The ARTEMIS study]                                                                                                                         |
| 181                                                                                                                                       | Palacios                       | 2008 | [Adverse effects of atazanavir]                                                                                                                                                    |
| 182                                                                                                                                       | Elion                          | 2008 | Once-daily abacavir/lamivudine and ritonavir-boosted atazanavir for the treatment of HIV-1 infection in antiretroviral-naïve patients: a 48-week pilot study                       |
| 183                                                                                                                                       | Murphy                         | 2008 | Seven-year efficacy of a lopinavir/ritonavir-based regimen in antiretroviral-naïve HIV-1-infected patients                                                                         |
| 184                                                                                                                                       | NR                             | 2008 | Abacavir and didanosine increase the risk of heart attack                                                                                                                          |
| 185                                                                                                                                       | NR                             | 2008 | Ninety-six week data released on TMC278                                                                                                                                            |
| 186                                                                                                                                       | NR                             | 2008 | Raltegravir phase III study data released                                                                                                                                          |
| 187                                                                                                                                       | NR                             | 2008 | 96-week CASTLE data show similar efficacy results                                                                                                                                  |

**Table S4 – List of excluded studies by exclusion reason (continuation)**

| Studies excluded because they were not randomized controlled clinical trials or performed a joint analysis of two or more clinical trials |                                |      |                                                                                                                                                         |
|-------------------------------------------------------------------------------------------------------------------------------------------|--------------------------------|------|---------------------------------------------------------------------------------------------------------------------------------------------------------|
| Amount                                                                                                                                    | First author or research group | Year | Title                                                                                                                                                   |
| 188                                                                                                                                       | Portilla                       | 2008 | [Efficacy of atazanavir in rescue therapy]                                                                                                              |
| 189                                                                                                                                       | Marcellin                      | 2008 | Depressive symptoms and exposure to efavirenz in West African HIV-infected adults                                                                       |
| 190                                                                                                                                       | De Meyer                       | 2008 | Influence of baseline protease inhibitor resistance on the efficacy of darunavir/ritonavir or lopinavir/ritonavir in the TITAN trial                    |
| 191                                                                                                                                       | NR                             | 2008 | [Metabolic changes in PI-based HAART. Change to atazanavir: continued effectiveness with improved lipid profile]                                        |
| 192                                                                                                                                       | NR                             | 2008 | [Also consider cardiovascular risk. Every HIV patient "his" HAART]                                                                                      |
| 193                                                                                                                                       | NR                             | 2008 | Anti-HIV agents. The Castle study: lopinavir vs. atazanavir                                                                                             |
| 194                                                                                                                                       | NR                             | 2008 | Anti-HIV agents. Receptor blocker (SCH 532706) enters clinical trials                                                                                   |
| 195                                                                                                                                       | Fujiwara                       | 2009 | Potent antiviral activity and well-characterized exposure-activity relationship of S/GSK1349572, a next generation integrase inhibitor (INI)            |
| 196                                                                                                                                       | Girard                         | 2009 | A randomized trial of two-drug versus three-drug tenofovir-containing maintenance regimens in virologically controlled HIV-1 patients                   |
| 197                                                                                                                                       | Girard                         | 2009 | Etravirine (ETR) demonstrates a favourable safety and tolerability profile: Pooled 96-week results from the Phase III DUET trials                       |
| 198                                                                                                                                       | Carlevari                      | 2009 | The 48-week efficacy and safety of switching to fixed-dose efavirenz/emtricitabine/ tenofovir df in HIV-1-infected patients receiving HAART             |
| 199                                                                                                                                       | Carlevari                      | 2009 | Patient reported outcomes after simplification to a single tablet regimen of efavirenz (EFV)/emtricitabine (FTC)/tenofovir DF (TDF)                     |
| 200                                                                                                                                       | Carlevari                      | 2009 | Simplification of therapy (ART) with efavirenz/ emtricitabine/tenofovir df single tablet regimen vs. continued art in suppressed, HIV-infected patients |
| 201                                                                                                                                       | Church                         | 2009 | Maraviroc for previously treated patients with R5 HIV-1 infection                                                                                       |
| 202                                                                                                                                       | Stellbrink                     | 2009 | Comparison of renal and bone toxicities, and CV serum risk markers, in the ASSERT study: 48-week results from a prospective randomised trial            |
| 203                                                                                                                                       | Pittrak                        | 2009 | Head-to-head comparison of two first-line regimens and an NRTI-sparing regimen for initial therapy of HIV-1 infection: what should we start?            |
| 204                                                                                                                                       | Katlama                        | 2009 | Efficacy and safety of etravirine in treatment-experienced, HIV-1 patients: pooled 48 week analysis of two randomized, controlled trials                |
| 205                                                                                                                                       | Walmsley                       | 2009 | Multidrug-experienced HIV-1-infected women demonstrated similar virological and immunological responses to tipranavir/ritonavir compared with men       |
| 206                                                                                                                                       | Arastéh                        | 2009 | Efficacy and safety of darunavir/ritonavir in treatment-experienced HIV type-1 patients in the POWER 1, 2 and 3 trials at week 96                       |
| 207                                                                                                                                       | Palter                         | 2009 | Etravirine in highly treatment-experienced patients                                                                                                     |
| 208                                                                                                                                       | Cocohoba                       | 2009 | The SWITCHMRK studies: substitution of lopinavir/ritonavir with raltegravir in HIV-positive individuals                                                 |
| 209                                                                                                                                       | Markowitz                      | 2009 | Sustained antiretroviral effect of raltegravir after 96 weeks of combination therapy in treatment-naïve patients with HIV-1 infection                   |
| 210                                                                                                                                       | Arastéh                        | 2009 | Efficacy and safety of darunavir/ritonavir in treatment-experienced HIV type-1 patients in the POWER 1, 2 and 3 trials at week 96                       |
| 211                                                                                                                                       | Boesecke                       | 2009 | Immune reconstitution diseases in HIV-infected, antiretroviral therapy-naïve patients recruited into the ALTAIR study                                   |
| 212                                                                                                                                       | Cahn                           | 2009 | Efficacy and safety of lopinavir/ritonavir monotherapy vs. standard of care consisting of a protease inhibitor and two NRTIs in adults with HIV-1       |



**Table S4 – List of excluded studies by exclusion reason (continuation)**

| Studies excluded because they were not randomized controlled clinical trials or performed a joint analysis of two or more clinical trials |                                |      |                                                                                                                                                                                                                                                                |
|-------------------------------------------------------------------------------------------------------------------------------------------|--------------------------------|------|----------------------------------------------------------------------------------------------------------------------------------------------------------------------------------------------------------------------------------------------------------------|
| Amount                                                                                                                                    | First author or research group | Year | Title                                                                                                                                                                                                                                                          |
| 213                                                                                                                                       | Cohen                          | 2009 | The ARTEMIS trial: once-daily darunavir/ritonavir in the management of treatment-naïve, HIV-infected patients                                                                                                                                                  |
| 214                                                                                                                                       | Fatkenheuer                    | 2009 | ARTEMIS 96-week comparison of liver tolerability of once-daily darunavir/ritonavir (DRV/r) versus lopinavir/ritonavir (LPV/r) in treatment-naïve patients                                                                                                      |
| 215                                                                                                                                       | Flamm                          | 2009 | Comparison of gastrointestinal adverse events (GI AES) of darunavir/ritonavir (DRV/R) and lopinavir/ritonavir (LPV/R) at week 96 in ARTEMIS                                                                                                                    |
| 216                                                                                                                                       | Gaultier                       | 2009 | Simplified antiretroviral therapy in special populations: clinical outcomes at week 48 of lopinavir/ritonavir (LPV/R) tablet dosed once daily (QD) or twice daily (BID), administered with (greater-than or equal to)2 nucleoside reverse transcriptase inhibi |
| 217                                                                                                                                       | Johnson                        | 2009 | Gender and race-based efficacy and safety analyses in ARV-naïve patients treated with boosted protease inhibitors (PIs): results from the CASTLE study                                                                                                         |
| 218                                                                                                                                       | Johnson                        | 2009 | CASTLE study: 96-week efficacy & safety of ATV/r versus LPV/r in antiretroviral-naïve HIV-1-infected patients                                                                                                                                                  |
| 219                                                                                                                                       | Johnson                        | 2009 | Gender-based differences in antiretroviral-naïve patients treated with ritonavir-boosted protease inhibitors: 96-week results from the CASTLE study                                                                                                            |
| 220                                                                                                                                       | Cohen                          | 2009 | Efficacy and safety of etravirine (TMC125) in treatment-experienced HIV-1-infected patients: 48-week results of a phase IIb trial                                                                                                                              |
| 221                                                                                                                                       | NR                             | 2009 | 96-Week MERIT ES analysis shows efficacy of Celsentri=Selzentry                                                                                                                                                                                                |
| 222                                                                                                                                       | NR                             | 2009 | Raltegravir as effective as efavirenz in 144-week data                                                                                                                                                                                                         |
| 223                                                                                                                                       | NR                             | 2009 | Long-term data on vicriviroc released                                                                                                                                                                                                                          |
| 224                                                                                                                                       | McNiff                         | 2009 | CCR5 antagonists in the treatment of HIV-infected persons: is their cancer risk increased, decreased, or unchanged                                                                                                                                             |
| 225                                                                                                                                       | Gupta                          | 2009 | Can the SMART study data be used to assess risk factors for renal disease?                                                                                                                                                                                     |
| 226                                                                                                                                       | Harris                         | 2009 | A randomized, open-label study of a nucleoside analogue reverse transcriptase inhibitor-sparing regimen in antiretroviral-naïve HIV-infected patients                                                                                                          |
| 227                                                                                                                                       | Warpakowski                    | 2009 | [One year with Atripla. Changeover to complete HIV therapy in a single tablet has proven successful]                                                                                                                                                           |
| 228                                                                                                                                       | Eron                           | 2010 | Switch to a raltegravir-based regimen versus continuation of a lopinavir-ritonavir-based regimen in stable HIV-infected patients with suppressed viraemia (SWITCHMRK 1 and 2): two multicentre, double-blind, randomised controlled trials                     |
| 229                                                                                                                                       | Gatell                         | 2010 | Long-term efficacy and safety of the HIV integrase inhibitor raltegravir in patients with limited treatment options in a Phase II study                                                                                                                        |
| 230                                                                                                                                       | Ghosn                          | 2010 | Long-term (96-week) follow-up of antiretroviral-naïve HIV-infected patients treated with first-line lopinavir/ritonavir monotherapy in the MONARK trial                                                                                                        |
| 231                                                                                                                                       | Hardy                          | 2010 | Two-year safety and virologic efficacy of maraviroc in treatment-experienced patients with CCR5-tropic HIV-1 infection: 96-week combined analysis of MOTIVATE 1 and 2                                                                                          |
| 232                                                                                                                                       | Hizue                          | 2010 | Pharmacological profile and clinical findings of Maraviroc (Celsentri® Tablets)                                                                                                                                                                                |
| 233                                                                                                                                       | Hull                           | 2010 | Etravirine in combination with darunavir/ritonavir and optimized background regimen results in suppression of HIV replication in treatment-experienced patients                                                                                                |

**Table S4 – List of excluded studies by exclusion reason (continuation)**

| Studies excluded because they were not randomized controlled clinical trials or performed a joint analysis of two or more clinical trials |                                |      |                                                                                                                                                                                                                              |
|-------------------------------------------------------------------------------------------------------------------------------------------|--------------------------------|------|------------------------------------------------------------------------------------------------------------------------------------------------------------------------------------------------------------------------------|
| Amount                                                                                                                                    | First author or research group | Year | Title                                                                                                                                                                                                                        |
| 234                                                                                                                                       | Cooper                         | 2010 | Switching to Atripla (EFV/FTC/TDF) from Kivexa (ABC/3TC) plus EFV leads to improved perceptions of treatment: Results from the ROCKET 1 study                                                                                |
| 235                                                                                                                                       | Coovadia                       | 2010 | Reuse of nevirapine in exposed HIV-infected children after protease inhibitor-based viral suppression: a randomized controlled trial                                                                                         |
| 236                                                                                                                                       | Currier                        | 2010 | Sex-based outcomes of darunavir-ritonavir therapy: a single-group trial                                                                                                                                                      |
| 237                                                                                                                                       | Schouten                       | 2010 | Substitution of nevirapine because of efavirenz toxicity in AIDS clinical trials group A5095                                                                                                                                 |
| 238                                                                                                                                       | Steigbigel                     | 2010 | Long-term efficacy and safety of Raltegravir combined with optimized background therapy in treatment-experienced patients with drug-resistant HIV infection: week 96 results of the BENCHMRK 1 and 2 Phase III trials        |
| 239                                                                                                                                       | Tungsiripat                    | 2010 | A pilot study to determine the impact on dyslipidemia of adding tenofovir to stable background antiretroviral therapy: ACTG 5206                                                                                             |
| 240                                                                                                                                       | Lampe                          | 2010 | Changes in lipids and lipoprotein particle concentrations after interruption of antiretroviral therapy                                                                                                                       |
| 241                                                                                                                                       | Manosuthi                      | 2010 | Renal impairment after switching from stavudine/lamivudine to tenofovir/lamivudine in NNRTI-based antiretroviral regimens                                                                                                    |
| 242                                                                                                                                       | Landman                        | 2010 | Efficacy and safety of unboosted atazanavir in combination with lamivudine and didanosine in naive HIV type 1 patients in Senegal                                                                                            |
| 243                                                                                                                                       | Katlama                        | 2010 | Efficacy and safety of etravirine at week 96 in treatment-experienced HIV type-1-infected patients in the DUET-1 and DUET-2 trials                                                                                           |
| 244                                                                                                                                       | Zaccarelli                     | 2010 | Is there any potential for first-line etravirine use? Analysis from a large data set of antiretroviral therapy-naive HIV-infected patients undergoing resistance test                                                        |
| 245                                                                                                                                       | Peter                          | 2010 | DART and laboratory monitoring of HIV treatment                                                                                                                                                                              |
| 246                                                                                                                                       | Rockstroh                      | 2010 | Once-daily S/GSK1349572 combination therapy in antiretroviral-naïve adults: Rapid and potent 24- week antiviral responses in SPRING-1 (ING112276)                                                                            |
| 247                                                                                                                                       | DeJesus                        | 2010 | Nevirapine (NVP) vs ritonavir-boosted atazanavir (ATV/r) combined with tenofovir/emtricitabine (TDF/FTC) in first-line therapy: NEWART 48-week data                                                                          |
| 248                                                                                                                                       | Izzo                           | 2010 | A magnifying glass onto renal function and serum lipid evolutions after tenofovir (TDF) and emtricitabine (FTC) in combination with atazanavir/ritonavir (ATV/r) versus efavirenz (EFV) as first-line HAART (the INCA trial) |
| 249                                                                                                                                       | Kumar                          | 2010 | SUPPORT: 48-week results of fosamprenavir/ ritonavir vs efavirenz with abacavir/lamivudine in under-represented, antiretroviral-naïve patients                                                                               |
| 250                                                                                                                                       | Martinez                       | 2010 | Long-term outcomes of switching to fixed-dose abacavir/lamivudine (ABC/3TC) or tenofovir/ emtricitabine (TDF/FTC): 3-year results of the BICOMBO study                                                                       |
| 251                                                                                                                                       | Nozza                          | 2010 | Efficacy and safety of an NRTI-sparing regimen in antiretroviral-naïve HIV-infected patients: once-daily maraviroc plus lopinavir/ritonavir                                                                                  |
| 252                                                                                                                                       | Stellbrink                     | 2010 | The SENSE trial: etravirine shows lower prevalence and severity of neuropsychiatric adverse events compared to efavirenz in treatment-naïve patients                                                                         |
| 253                                                                                                                                       | Winston                        | 2010 | Neuropsychiatric adverse events and CSF penetration effectiveness (CSF) score in the MONET trial of darunavir/ritonavir (DRV/r), with or without nucleoside analogues (NRTIs)                                                |
| 254                                                                                                                                       | Overton                        | 2010 | Metabolic: week 48 comparison of metabolic parameters and biomarkers in subjects receiving darunavir/ritonavir or atazanavir/ritonavir                                                                                       |

**Table S4 – List of excluded studies by exclusion reason (continuation)**

| Studies excluded because they were not randomized controlled clinical trials or performed a joint analysis of two or more clinical trials |                                |      |                                                                                                                                                                                                                                                                 |
|-------------------------------------------------------------------------------------------------------------------------------------------|--------------------------------|------|-----------------------------------------------------------------------------------------------------------------------------------------------------------------------------------------------------------------------------------------------------------------|
| Amount                                                                                                                                    | First author or research group | Year | Title                                                                                                                                                                                                                                                           |
| 255                                                                                                                                       | NR                             | 2010 | Tenofovir/emtricitabine combination results in lower bone-mineral density                                                                                                                                                                                       |
| 256                                                                                                                                       | Arribas                        | 2010 | Effects of once-daily versus twice-daily darunavir/ritonavir on lipid parameters at week 48 in treatment-experienced, HIV-1-infected patients with no darunavir resistance-associated mutations (RAMs) in the ODIN study                                        |
| 257                                                                                                                                       | Garvey                         | 2010 | Changes in cerebral function parameters in HIV-1 infected subjects undergoing a treatment simplification to darunavir/ritonavir:A randomized, prospective study                                                                                                 |
| 258                                                                                                                                       | Gathe                          | 2010 | Comparison of 48 week efficacy, pharmacokinetics and safety of 400 mg QD nevirapine (NVP) extended release (Viramune XR) versus 200 mg BID nevirapine immediate release (Viramune IR) formulations in combination with emtricitabine/tenofovir in antiretrovira |
| 259                                                                                                                                       | Moyle                          | 2010 | Comparison of bone and renal toxicities in the ASSERT study: Final 96 week results from a prospective randomized safety trial                                                                                                                                   |
| 260                                                                                                                                       | Orkin                          | 2010 | Changes in patient-reported outcomes during the sense trial: First-line treatment with nrtis plus etravirine or efavirenz                                                                                                                                       |
| 261                                                                                                                                       | DeJesus                        | 2010 | Improvement in fasting lipids but minimal recovery of limb fat were seen 96 weeks after switching from lamivudine/zidovudine (CBV) plus efavirenz (EFV) to fixed-dose efavirenz/emtricitabine/tenofovir df (ATR) in hiv-infected patients                       |
| 262                                                                                                                                       | Young                          | 2010 | A pilot study of abacavir/lamivudine and raltegravir in antiretroviral-naïve HIV-1-infected patients: 48-week results of the SHIELD trial                                                                                                                       |
| 263                                                                                                                                       | Simpkin                        | 2010 | Boosted protease inhibitor (PI/r) monotherapy is effective in clinical practice                                                                                                                                                                                 |
| 264                                                                                                                                       | Cahn                           | 2010 | Efficacy and safety of lopinavir/ritonavir (LPV/R) monotherapy vs. standard of care in HIV-infected patients on their first protease inhibitor-based regimen: 48 week-follow up                                                                                 |
| 265                                                                                                                                       | Wilkin                         | 2010 | TMC278 shows favorable tolerability and non-inferior efficacy compared to efavirenz over 192 weeks in HIV-1-infected treatment-naïve patients                                                                                                                   |
| 266                                                                                                                                       | Kumar                          | 2010 | Fosamprenavir/ritonavir (FPV/r) vs. Efavirenz (EFV) with abacavir/lamivudine (ABC/3TC) in underrepresented, antiretroviral (ARV) naïve, HIV-infected subjects (SUPPORT): 24Week efficacy, safety, and tolerability                                              |
| 267                                                                                                                                       | NR                             | 2010 | First-line raltegravir. No evidence of comparative effectiveness                                                                                                                                                                                                |
| 268                                                                                                                                       | Dolgin                         | 2011 | Trial in youngest group points to HIV treatment overhaul                                                                                                                                                                                                        |
| 269                                                                                                                                       | Ebeling                        | 2011 | Lowerfatmass and lowerbone formation predict greater bone loss with tenofovir in HIV-infected adults                                                                                                                                                            |
| 270                                                                                                                                       | Gallien                        | 2011 | Four year follow-up of simplification therapy with once-daily emtricitabine, didanosine and efavirenz in HIV-infected patients (ALIZE ANRS 099 trial)                                                                                                           |
| 271                                                                                                                                       | Herath                         | 2011 | The 10-year safety and efficacy of a tenofovir disoproxil fumarate (TDF)-containing, once-daily highly active antiretroviral therapy (HAART)                                                                                                                    |
| 272                                                                                                                                       | Castagna                       | 2011 | Changes in patient-reported outcomes during the sense trial: First-line treatment with 2 Nrtis plus etravirine or efavirenz                                                                                                                                     |
| 273                                                                                                                                       | Cooper                         | 2011 | The effects of enfuvirtide therapy on body composition and metabolic parameters over 48 weeks in the TORO body imaging substudy                                                                                                                                 |
| 274                                                                                                                                       | Currier                        | 2011 | Effects of darunavir/ritonavir-based therapy on metabolic and anthropometric parameters in women and men over 48 weeks                                                                                                                                          |

**Table S4 – List of excluded studies by exclusion reason (continuation)**

| Studies excluded because they were not randomized controlled clinical trials or performed a joint analysis of two or more clinical trials |                                |      |                                                                                                                                                                                                                                                        |
|-------------------------------------------------------------------------------------------------------------------------------------------|--------------------------------|------|--------------------------------------------------------------------------------------------------------------------------------------------------------------------------------------------------------------------------------------------------------|
| Amount                                                                                                                                    | First author or research group | Year | Title                                                                                                                                                                                                                                                  |
| 275                                                                                                                                       | Scourfield                     | 2011 | Absence of skin hypersensitivity in subjects switching to etravirine with undetectable plasma HIV RNA: A randomized prospective study                                                                                                                  |
| 276                                                                                                                                       | Tenorio                        | 2011 | The monoclonal CCR5 antibody PRO-140: the promise of once-weekly HIV therapy                                                                                                                                                                           |
| 277                                                                                                                                       | Uglietti                       | 2011 | The sense trial: Etravirine shows lower prevalence and severity of neuropsychiatric adverse events compared to efavirenz in treatment-naïve patients                                                                                                   |
| 278                                                                                                                                       | Lazzarin                       | 2011 | Artemis: 192-Week efficacy and safety of once daily darunavir/ritonavir (DRV/r) versus lopinavir/R (LPV/r) in treatment-naïve HIV-1-infected adults                                                                                                    |
| 279                                                                                                                                       | MacArthur                      | 2011 | Clinical trial report: TMC278 (Rilpivirine) versus efavirenz as initial therapy in treatment-Naïve, HIV-1-infected patients                                                                                                                            |
| 280                                                                                                                                       | Dlamini                        | 2011 | Lactic acidosis and symptomatic hyperlactataemia in a randomized trial of first-line therapy in HIV-infected adults in South Africa                                                                                                                    |
| 281                                                                                                                                       | Battegay                       | 2011 | Bioavailability of extended-release nevirapine 400 and 300 mg in HIV-1: a multicenter, open-label study                                                                                                                                                |
| 282                                                                                                                                       | Fourie                         | 2011 | Effect of baseline characteristics on the efficacy and safety of once-daily darunavir/ ritonavir in HIV-1-infected, treatment-naïve ARTEMIS patients at week 96                                                                                        |
| 283                                                                                                                                       | Young                          | 2011 | 96-week results of a pilot study of Abacavir/Lamivudine and raltegravir in antiretroviral-Naïve HIV-1-infected patients: The SHIELD trial                                                                                                              |
| 284                                                                                                                                       | Nelson                         | 2011 | Pooled week-48 safety and efficacy results from ECHO and THRIVE Phase III trials comparing TMC278 vs EFV in treatment-naïve HIV-1-infected patients receiving FTC/TDF                                                                                  |
| 285                                                                                                                                       | Nozza                          | 2011 | Efficacy and safety of once daily maraviroc plus lopinavir/ritonavir in antiretroviral naïve HIVinfected patients                                                                                                                                      |
| 286                                                                                                                                       | Ribaudo                        | 2011 | No risk of myocardial infarction associated with initial antiretroviral treatment containing abacavir: short and long-term results from ACTG A5001/ALLRT                                                                                               |
| 287                                                                                                                                       | Ripamonti                      | 2011 | No correlation between risk of neuropsychiatric adverse events and csf penetration effectiveness (CPE) score in the monet trial of darunavir/ritonavir (DRV/R), with or without nucleoside analogues (NRTIS)                                           |
| 288                                                                                                                                       | Lake                           | 2011 | Raltegravir as replacement for PI- or NNRTIbased ART in HIV-infected women with lipohypertrophy: the Women, Integrase, and Fat Accumulation Trial                                                                                                      |
| 289                                                                                                                                       | Squires                        | 2011 | Efficacy/Tolerability of unboosted atazanavir versus Atazanavir/Ritonavir, each in combination with Abacavir/Lamivudine, after initial suppression with Abacavir/Lamivudine+Atazanavir/Ritonavir in HIV-1-infected patients: 144-week results of aries |
| 290                                                                                                                                       | NR                             | 2011 | Initial results reported on raltegravir once-daily dosing                                                                                                                                                                                              |
| 291                                                                                                                                       | Fatkenheuer                    | 2011 | The SENSE trial week 48 results: Etravirine shows lower prevalence of lipid abnormalities, compared to efavirenz in treatment-naïve patients                                                                                                           |
| 292                                                                                                                                       | Haskelberg                     | 2011 | Lower fat mass and lower bone formation predict greater bone loss with tenofovir in HIV-infected adults                                                                                                                                                |
| 293                                                                                                                                       | Moyle                          | 2011 | Changes in bone mineral density after 96 weeks of treatment with tenofovir DF/emtricitabine plus atazanavir/ritonavir or lopinavir/ritonavir in HIV-1 infected treatment naïve subjects: The CASTLE body composition sub-study                         |
| 294                                                                                                                                       | Soriano                        | 2011 | Resistance data in the ARTEN trial [2]                                                                                                                                                                                                                 |

**Table S4 – List of excluded studies by exclusion reason (continuation)**

| Studies excluded because they were not randomized controlled clinical trials or performed a joint analysis of two or more clinical trials |                                |      |                                                                                                                                                                                                                                                                |
|-------------------------------------------------------------------------------------------------------------------------------------------|--------------------------------|------|----------------------------------------------------------------------------------------------------------------------------------------------------------------------------------------------------------------------------------------------------------------|
| Amount                                                                                                                                    | First author or research group | Year | Title                                                                                                                                                                                                                                                          |
| 295                                                                                                                                       | Winston                        | 2011 | Three-year evaluation of neuropsychiatric adverse events in the MONET trial of darunavir/ ritonavir (DRV/r), with or without nucleoside analogues (NRTIs)                                                                                                      |
| 296                                                                                                                                       | Elion                          | 2011 | The single-tablet regimen of elvitegravir/cobicistat/emtricitabine/tenofovir disoproxil fumarate (EVG/COBI/FTC/TDF; Quad) maintains a high rate of virologic suppression, and cobicistat (COBI) is an effective pharmacoenhancer through 48 weeks              |
| 297                                                                                                                                       | Mills                          | 2011 | Neurologic and psychiatric safety profile of TMC278 compared with efavirenz (EFV) in treatment-naïve HIV-1-infected patients: Pooled analysis from the randomized double-blind phase III ECHO and THRIVE trials at 48 weeks                                    |
| 298                                                                                                                                       | Walmsley                       | 2011 | Pooled week 48 safety and efficacy results from ECHO and thrive phase III trials comparing TMC278 vs EFV in treatment-naïve HIV-1-infected patients receiving FTC/TDF                                                                                          |
| 299                                                                                                                                       | NR                             | 2011 | Rilpivirine (Edurant)--a new drug for HIV infection                                                                                                                                                                                                            |
| 300                                                                                                                                       | Warpakowski                    | 2011 | [Long-term therapy strategy with raltegravir. Appropriate in all illness phases]                                                                                                                                                                               |
| 301                                                                                                                                       | Warpakowski                    | 2011 | [Persistence in focus. Atazanavir proves itself anew in long-term therapy]                                                                                                                                                                                     |
| 302                                                                                                                                       | Alvarez                        | 2011 | Changes in patient-reported outcomes during the SENSE Trial: first-line treatment with 2 NRTIs plus etravirine or efavirenz for 48 weeks                                                                                                                       |
| 303                                                                                                                                       | Hodder                         | 2012 | Efficacy and Safety Outcomes Among Treatment-Experienced Women and Men Treated with Etravirine in Gender, Race and Clinical Experience                                                                                                                         |
| 304                                                                                                                                       | DeJesus                        | 2012 | Efficacy, safety and pharmacokinetic results of an ongoing international phase 3 study comparing elvitegravir/ cobicistat/emtricitabine/tenofovir DF (Quad) with ritonavirboosted atazanavir plus emtricitabine/tenofovir DF in treatment naïve HIV-1 infected |
| 305                                                                                                                                       | Eron Jr                        | 2012 | Dolutegravir treatment response by baseline viral load and NRTI backbone in treatment-naïve HIV-infected individuals                                                                                                                                           |
| 306                                                                                                                                       | Fisher                         | 2012 | SPIRIT: switching to emtricitabine/rilpivirine/tenofovir DF single-tablet regimen from boosted protease inhibitor maintains HIV suppression at week 48                                                                                                         |
| 307                                                                                                                                       | Gallant                        | 2012 | Cobicistat versus ritonavir as pharmacoenhancers in combination with atazanavir plus tenofovir disoproxil fumarate/emtricitabine: phase 3 randomized, double blind, active-controlled trial, week 48 results                                                   |
| 308                                                                                                                                       | Girard                         | 2012 | Pooled week 96 results of the phase III DUET-1 and DUET-2 trials of etravirine: further analysis of adverse events and laboratory abnormalities of special interest                                                                                            |
| 309                                                                                                                                       | Henry                          | 2012 | SWIFT: switching from lamivudine/abacavir to emtricitabine/tenofovir improved lipids while maintaining virologic suppression in older HIV subjects                                                                                                             |
| 310                                                                                                                                       | Hodder                         | 2012 | Effect of gender and race on the week 48 findings in treatment-naïve, HIV-1-infected patients enrolled in the randomized, phase III trials ECHO and THRIVE                                                                                                     |
| 311                                                                                                                                       | Arasteh                        | 2012 | TRANxITION 144-week results: switching virologically stable HIV patients from immediate-release nevirapine (NVP IR) to extended-release NVP (XR)                                                                                                               |
| 312                                                                                                                                       | Blanco                         | 2012 | Intensification with maraviroc in HIV-infected individuals (with or without liver cirrhosis) with a discordant CD4 response to cART                                                                                                                            |

**Table S4 – List of excluded studies by exclusion reason (continuation)**

| Studies excluded because they were not randomized controlled clinical trials or performed a joint analysis of two or more clinical trials |                                |      |                                                                                                                                                                                                                                            |
|-------------------------------------------------------------------------------------------------------------------------------------------|--------------------------------|------|--------------------------------------------------------------------------------------------------------------------------------------------------------------------------------------------------------------------------------------------|
| Amount                                                                                                                                    | First author or research group | Year | Title                                                                                                                                                                                                                                      |
| 313                                                                                                                                       | Bonora                         | 2012 | Short-term additional enfuvirtide therapy is associated with a greater immunological recovery in HIV very late presenters: a controlled pilot study                                                                                        |
| 314                                                                                                                                       | Brinson                        | 2012 | VERxVE 144 week results: nevirapine extended-release (NVP XR) QD versus NVP immediate-release (IR) BID with FTC/TDF in treatment-naïve HIV-1 patients                                                                                      |
| 315                                                                                                                                       | Cohen                          | 2012 | A randomized pilot study of tenofovir/emtricitabine (TDF/ FTC) + boosted atazanavir (ATV/r) vs. raltegravir (RAL BID) + ATV/r vs. RAL BID + ATV BID                                                                                        |
| 316                                                                                                                                       | Cohen                          | 2012 | STAR Study: single tablet regimen emtricitabine/rilpivirine/ tenofovir DF is non-inferior to efavirenz/emtricitabine/ tenofovir DF in ART-naïve adults                                                                                     |
| 317                                                                                                                                       | Cure                           | 2012 | Mixed-treatment comparison of the efficacy and safety of antiretroviral drugs indicated for treatment-experienced hiv patients                                                                                                             |
| 318                                                                                                                                       | Sanford                        | 2012 | Rilpivirine                                                                                                                                                                                                                                |
| 319                                                                                                                                       | Sax                            | 2012 | Elvitegravir/cobicistat/emtricitabine/tenofovir DF (Quad) has non-inferior efficacy and favorable safety compared to efavirenz/emtricitabine/tenofovir DF in treatment naïve HIV-1 infected subjects                                       |
| 320                                                                                                                                       | Zala                           | 2012 | Safety and efficacy of GSK2248761, a next-generation nonnucleoside reverse transcriptase inhibitor, in treatment-naïve HIV-1-infected subjects                                                                                             |
| 321                                                                                                                                       | Zolopa                         | 2012 | Elvitegravir/cobicistat/emtricitabine/tenofovir DF (QUAD) has durable efficacy and differentiated safety compared to efavirenz/emtricitabine/tenofovir DF at week 96 in treatment-naïve HIV-1-infected patients                            |
| 322                                                                                                                                       | Martinez                       | 2012 | Metabolic effects of atazanavir/ritonavir vs darunavir/ ritonavir in combination with tenofovir/emtricitabine in antiretroviral-naïve patients (ATADAR Study)                                                                              |
| 323                                                                                                                                       | Wilkin                         | 2012 | Long-term efficacy, safety, and tolerability of rilpivirine (RPV, TMC278) in HIV type 1-infected antiretroviral-naïve patients: week 192 results from a phase IIb randomized trial                                                         |
| 324                                                                                                                                       | Cahn                           | 2012 | Rilpivirine in the treatment of HIV infection: Evidence from the ECHO and THRIVE studies                                                                                                                                                   |
| 325                                                                                                                                       | Cohen                          | 2012 | Efficacy and safety of rilpivirine (TMC278) versus efavirenz at 48 weeks in treatment-naïve HIV-1-infected patients: pooled results from the phase 3 double-blind randomized ECHO and THRIVE Trials                                        |
| 326                                                                                                                                       | Caseiro                        | 2012 | Vicriviroc plus optimized background therapy for treatment-experienced subjects with CCR5 HIV-1 infection: final results of two randomized phase III trials                                                                                |
| 327                                                                                                                                       | Nozza                          | 2012 | Maraviroc 150 mg QD plus lopinavir/ritonavir, a NRTIsparing regimen for HIV-infected naïve patients: 48-weeks final results                                                                                                                |
| 328                                                                                                                                       | Orkin                          | 2012 | Incidence of rash in the 96-week analysis of the pooled Phase III randomised double-blind ECHO and THRIVE trials                                                                                                                           |
| 329                                                                                                                                       | Pasquau                        | 2012 | A clinical trial to compare the quality of life of HIV+ patients who start monotherapy with LPV/r versus continuing triple therapy with a boosted PI                                                                                       |
| 330                                                                                                                                       | Raffi                          | 2012 | Once-daily dolutegravir (DTG; S/GSK1349572) is non-inferior to raltegravir (RAL) in antiretroviral-naïve adults: 48 week results from SPRING-2 (ING113086)                                                                                 |
| 331                                                                                                                                       | Rockstroh                      | 2012 | Elvitegravir/cobicistat/emtricitabine/tenofovir DF (QUAD) has durable efficacy and differentiated safety compared to atazanavir boosted by ritonavir plus emtricitabine/tenofovir DF at week 96 in treatment-naïve HIV-1-infected patients |

**Table S4 – List of excluded studies by exclusion reason (continuation)**

| Studies excluded because they were not randomized controlled clinical trials or performed a joint analysis of two or more clinical trials |                                |      |                                                                                                                                                                                                                                                                 |
|-------------------------------------------------------------------------------------------------------------------------------------------|--------------------------------|------|-----------------------------------------------------------------------------------------------------------------------------------------------------------------------------------------------------------------------------------------------------------------|
| Amount                                                                                                                                    | First author or research group | Year | Title                                                                                                                                                                                                                                                           |
| 332                                                                                                                                       | Anderson                       | 2012 | Week 96 outcomes of patients with less treatment experience versus more treatment experience receiving etravirine in the DUET trials                                                                                                                            |
| 333                                                                                                                                       | Bonjoch                        | 2012 | Switching the NNRTI or the PI/r to maraviroc in aviraemic subjects infected with R5 HIV by V3- loop population sequencing: 48-week, prospective, randomized, controlled, pilot study                                                                            |
| 334                                                                                                                                       | De Jesus                       | 2012 | Week 48 results of an ongoing global phase 3 study comparing elvitegravir/cobicistat/emtricitabine/tenofovir DF (Quad ) with ritonavir-boosted atazanavir plus emtricitabine/tenofovir DF in treatment naive HIV-1 infected subjects showing efficacy, safety   |
| 335                                                                                                                                       | Elion                          | 2012 | Efficacy and safety results from a randomized, double blind, active controlled trial of elvitegravir (once-daily) versus raltegravir (twice-daily) in treatment-experienced HIV-positive patients: long term 96-week data                                       |
| 336                                                                                                                                       | Li                             | 2012 | Efficacy and safety of an antiretroviral regimen containing six months of stavudine followed by long-term zidovudine for firstline HIV therapy in resource-limited settings: an open-label, randomized, multicenter trial in China                              |
| 337                                                                                                                                       | Logue                          | 2012 | SWIFT study: switching from lamivudine/abacavir (3TC/ABC) to emtricitabine/tenofovir DF (FTC/TDF) improved fasting lipid parameters while maintaining virologic suppression                                                                                     |
| 338                                                                                                                                       | Hodder                         | 2012 | Sustained efficacy and safety observed in women for rilpivirine (RPV) versus efavirenz (EFV) plus emtricitabine/tenofovir DF (FTC/TDF) and with few gender differences in treatment-naive, HIV- 1 infected adults-pooled 96-week ECHO and THRIVE analysis       |
| 339                                                                                                                                       | Moyle                          | 2012 | Associations between visceral adipose tissue and hypertriglyceridaemic waist circumference phenotype in a randomized prospective comparison between atazanavir/ritonavir and lopinavir/ritonavir each in combination with tenofovir DF/emtricitabine in antiret |
| 340                                                                                                                                       | Pommer                         | 2012 | [A single tablet against HIV: new combination preparation improves therapy]                                                                                                                                                                                     |
| 341                                                                                                                                       | Palella                        | 2012 | SPIRIT study: Switching to emtricitabine/rilpivirine/ tenofovir df (FTC/RPV/TDF) single-tablet regimen (STR) from a ritonavir-boosted protease inhibitor and two nucleoside reverse transcriptase inhibitors (NRTIS) maintains HIV suppression and improves ser |
| 342                                                                                                                                       | Ryan                           | 2013 | Outcomes in Older Versus Younger Patients Over 96 Weeks in HIV-1-Infected Patients Treated with Rilpivirine or Efavirenz in ECHO and THRIVE                                                                                                                     |
| 343                                                                                                                                       | Eron                           | 2013 | Efficacy and safety of raltegravir for treatment of HIV for 5 years in the BENCHMRK studies: final results of two randomised, placebo-controlled trials                                                                                                         |
| 344                                                                                                                                       | Fisher                         | 2013 | Efficacy and Safety of elvitegravir/cobicistat/emtricitabine/ tenofovir DF from an integrated analysis of Phase 2 and 3 clinical trials                                                                                                                         |
| 345                                                                                                                                       | Cohen                          | 2013 | Week 96 efficacy and safety of rilpivirine in treatment-naive, HIV-1 patients in two Phase III randomized trials                                                                                                                                                |
| 346                                                                                                                                       | Molina                         | 2013 | Rilpivirine vs. efavirenz in HIV-1 patients with baseline viral load 100,000 copies/ml or less: week 48 phase III analysis                                                                                                                                      |
| 347                                                                                                                                       | Nelson                         | 2013 | Rilpivirine versus efavirenz in HIV-1-infected subjects receiving emtricitabine/tenofovir DF: pooled 96-week data from ECHO and THRIVE Studies                                                                                                                  |
| 348                                                                                                                                       | Iwata                          | 2013 | Pharmacological properties of rilpivirine (Edurant Tablet), a new drug for the treatment of HIV, and results of its clinical studies                                                                                                                            |
| 349                                                                                                                                       | Arribas                        | 2013 | Predictors of long-term HIV RNA suppression on darunavir/ritonavir monotherapy in the MONET trial                                                                                                                                                               |

**Table S4 – List of excluded studies by exclusion reason (continuation)**

| Studies excluded because they were not randomized controlled clinical trials or performed a joint analysis of two or more clinical trials |                                |      |                                                                                                                                                                                                                                         |
|-------------------------------------------------------------------------------------------------------------------------------------------|--------------------------------|------|-----------------------------------------------------------------------------------------------------------------------------------------------------------------------------------------------------------------------------------------|
| Amount                                                                                                                                    | First author or research group | Year | Title                                                                                                                                                                                                                                   |
| 350                                                                                                                                       | Babiker                        | 2013 | Considerations in the rationale, design and methods of the Strategic Timing of AntiRetroviral Treatment (START) study                                                                                                                   |
| 351                                                                                                                                       | Martínez                       | 2013 | Abacavir/Lamivudine Versus Tenofovir/Emtricitabine in Virologically Suppressed Patients Switching from Ritonavir-Boosted Protease Inhibitors to Raltegravir                                                                             |
| 352                                                                                                                                       | Mills                          | 2013 | Neurological and psychiatric tolerability of rilpivirine (TMC278) vs. efavirenz in treatment-naïve, HIV-1-infected patients at 48 weeks                                                                                                 |
| 353                                                                                                                                       | Ouattara                       | 2013 | Early upper digestive tract side effects of zidovudine with tenofovir plus emtricitabine in West African adults with high CD4 counts                                                                                                    |
| 354                                                                                                                                       | Eron                           | 2013 | Safety and efficacy of dolutegravir in treatment-experienced subjects with raltegravir-resistant HIV type 1 infection: 24-week results of the VIKING Study                                                                              |
| 355                                                                                                                                       | Brown                          | 2013 | Changes in bone turnover markers and association with decreased total bone mineral density (tBMD) in treatment-naïve subjects taking lopinavir/ritonavir combined with raltegravir or tenofovir/emtricitabine                           |
| 356                                                                                                                                       | Brunetta                       | 2013 | SPIRIT: switching to rilpivirine /emtricitabine / tenofovir DF single-tablet regimen from boosted protease inhibitor maintains HIV-1 virologic suppression through week 48 in HIV-1 infected subjects                                   |
| 357                                                                                                                                       | Chang                          | 2013 | Elvitegravir /cobicistat /emtricitabine /tenofovir DF has durable efficacy and differentiated safety compared to atazanavir boosted by ritonavir plus emtricitabine /tenofovir DF at week 96 in treatment-naïve HIV-1-infected patients |
| 358                                                                                                                                       | Cohen                          | 2013 | STAR: rilpivirine/Emtricitabine/TenofovirDF is non-inferior to Efavirenz/Emtricitabine/TenofovirDF in naïve adult Latino, black & white subpopulations                                                                                  |
| 359                                                                                                                                       | Cohen                          | 2013 | STaR study: single-tablet regimen rilpivirine/ emtricitabine/tenofovir DF maintains noninferiority to efavirenz/emtricitabine/tenofovir DF and has minimal impact on fasting lipids in ART-naïve adults through week 96                 |
| 360                                                                                                                                       | Orkin                          | 2013 | Week 96 efficacy and safety data: elvitegravir/cobicistat/ emtricitabine/tenofovir DF (Quad) compared to atazanavir boosted by ritonavir plus emtricitabine/tenofovir DF in treatment-naïve HIV-1-infected patients                     |
| 361                                                                                                                                       | Pallela                        | 2013 | Efficacy of switching to rilpivirine/emtricitabine/tenofovir DF from boosted PI in HIV-1 virologically suppressed patients with or without the K103N                                                                                    |
| 362                                                                                                                                       | Trottier                       | 2013 | Star study: single-tablet regimen rilpivirine/ emtricitabine /tenofovir DF is non-inferior to efavirenz/emtricitabine /tenofovir DF in ART-naïve HIV-1 infected adults                                                                  |
| 363                                                                                                                                       | Dubé                           | 2013 | Effects of antiretroviral therapy initiation on soluble CD163 and asymmetric dimethyl arginine levels and their relationships with endothelial function: Results from a 24-week prospective randomized trial                            |
| 364                                                                                                                                       | Overton                        | 2013 | Immune activation analysis over 48 weeks in INROADS, a study of the nucleoside/tide-sparing regimen of once-daily etravirine and darunavir/ritonavir                                                                                    |
| 365                                                                                                                                       | Fabbiani                       | 2014 | Simplification to atazanavir/ritonavir+lamivudine in virologically suppressed HIV-infected patients: 24-weeks interim analysis from ATLAS-M trial                                                                                       |
| 366                                                                                                                                       | Gatell                         | 2014 | Forty-eight-week efficacy and safety and early CNS tolerability of doravirine (MK-1439), a novel NNRTI, with TDF/FTC in ART-naïve HIV-positive patients                                                                                 |



**Table S4 – List of excluded studies by exclusion reason (continuation)**

| Studies excluded because they were not randomized controlled clinical trials or performed a joint analysis of two or more clinical trials |                                |      |                                                                                                                                                                                                                                                          |
|-------------------------------------------------------------------------------------------------------------------------------------------|--------------------------------|------|----------------------------------------------------------------------------------------------------------------------------------------------------------------------------------------------------------------------------------------------------------|
| Amount                                                                                                                                    | First author or research group | Year | Title                                                                                                                                                                                                                                                    |
| 367                                                                                                                                       | Clumeck                        | 2014 | A randomized, double-blind comparison of single-tablet regimen elvitegravir/cobicistat/emtricitabine/tenofovir DF vs ritonavir-boosted atazanavir plus emtricitabine/tenofovir DF for initial treatment of HIV-1 infection: analysis of week 144 results |
| 368                                                                                                                                       | Stein                          | 2014 | Prospective randomized clinical trial of the effects of three modern antiretroviral therapies on carotid intima-media thickness in HIV-infected individuals (aids clinical trials group study A5260S)                                                    |
| 369                                                                                                                                       | Yazdanpanah                    | 2014 | 48 week bone marker changes with Dolutegravir (DTG) plus Abacavir/Lamivudine (ABC/3TC) vs. Tenofovir/Emtricitabine/Efavirenz (EFV/TDF/ FTC): the SINGLE trial                                                                                            |
| 370                                                                                                                                       | Kiwuwa-Muyingo                 | 2014 | Prevalence, incidence and predictors of peripheral neuropathy in African adults with HIV infection within the DART trial                                                                                                                                 |
| 371                                                                                                                                       | Margolis                       | 2014 | Unexpected finding of delayed-onset seizures in HIV-positive, treatment-experienced subjects in the Phase IIb evaluation of fosdevirine (GSK2248761)                                                                                                     |
| 372                                                                                                                                       | Allavena                       | 2014 | Switching from tenofovir/emtricitabine and nevirapine to a tenofovir/emtricitabine/rilpivirine single-tablet regimen in virologically suppressed, HIV-1-infected subjects                                                                                |
| 373                                                                                                                                       | Antinori                       | 2014 | The PROTEA trial: darunavir/ritonavir with or without nucleoside analogues, for patients with HIV-1 RNA below 50 copies/mL                                                                                                                               |
| 374                                                                                                                                       | Behrens                        | 2014 | Rilpivirine versus efavirenz with emtricitabine/tenofovir disoproxil fumarate in treatment-naïve HIV-1-infected patients with HIV-1 RNA $\leq$ 100,000 copies/mL: week 96 pooled ECHO/THRIVE subanalysis                                                 |
| 375                                                                                                                                       | Carey                          | 2014 | Efavirenz 400 mg daily remains non-inferior to 600 mg: 96 week data from the double-blind, placebo-controlled ENCORE1 study                                                                                                                              |
| 376                                                                                                                                       | Clarke                         | 2014 | Analysis of neurocognitive function and CNS endpoints in the PROTEA trial: darunavir/ritonavir with or without nucleoside analogues                                                                                                                      |
| 377                                                                                                                                       | Spagnuolo                      | 2014 | Atazanavir/ritonavir monotherapy as maintenance strategy in HIV-1 treated subjects with viral suppression: 96-week analysis results of the MODAT study                                                                                                   |
| 378                                                                                                                                       | Tebas                          | 2014 | Lipid levels and changes in body fat distribution in treatment-naïve, HIV-1-Infected adults treated with rilpivirine or Efavirenz for 96 weeks in the ECHO and THRIVE trials                                                                             |
| 379                                                                                                                                       | Wilkins                        | 2014 | STaR study: single-tablet regimen (STR) of Rilpivirine/Emtricitabine/Tenofovir DF demonstrates significant difference to Efavirenz/Emtricitabine/Tenofovir DF in subjects with a baseline HIV-1 RNA $<$ 100,000 copies/mL through week 96                |
| 380                                                                                                                                       | Molina                         | 2014 | Week 96 analysis of rilpivirine or efavirenz in HIV-1-infected patients with baseline viral load $\leq$ 100 000 copies/mL in the pooled ECHO and THRIVE phase 3, randomized, double-blind trials                                                         |
| 381                                                                                                                                       | Molina                         | 2014 | Once-daily dolutegravir is superior to once-daily darunavir/ritonavir in treatment-naïve HIV-1-positive individuals: 96 week results from FLAMINGO                                                                                                       |
| 382                                                                                                                                       | Mollan                         | 2014 | Association between efavirenz as initial therapy for HIV-1 infection and increased risk for suicidal ideation or attempted or completed suicide: an analysis of trial data                                                                               |
| 383                                                                                                                                       | Mondi                          | 2014 | Efficacy and safety of treatment simplification to atazanavir/ritonavir/lamivudine in HIV-infected patients with virological suppression: 144 week follow-up of the AtLaS pilot study                                                                    |
| 384                                                                                                                                       | Mwafongo                       | 2014 | Renal events among women treated with tenofovir/emtricitabine in combination with either lopinavir/ritonavir or nevirapine                                                                                                                               |

**Table S4 – List of excluded studies by exclusion reason (continuation)**

| Studies excluded because they were not randomized controlled clinical trials or performed a joint analysis of two or more clinical trials |                                |      |                                                                                                                                                                                                                                                                                             |
|-------------------------------------------------------------------------------------------------------------------------------------------|--------------------------------|------|---------------------------------------------------------------------------------------------------------------------------------------------------------------------------------------------------------------------------------------------------------------------------------------------|
| Amount                                                                                                                                    | First author or research group | Year | Title                                                                                                                                                                                                                                                                                       |
| 385                                                                                                                                       | Orkin                          | 2014 | Week 144 efficacy and safety data: Elvitegravir/Cobicistat/Emtricitabine/Tenofovir DF (Stribild) demonstrates durable efficacy and differentiated safety compared to Atazanavir boosted by Ritonavir plus Emtricitabine/Tenofovir DF at week 144 in treatment-naïve HIV-1-infected patients |
| 386                                                                                                                                       | Paton                          | 2014 | The protease inhibitor versus ongoing triple-therapy (PIVOT) trial                                                                                                                                                                                                                          |
| 387                                                                                                                                       | Pinnetti                       | 2014 | Randomized trial of DRV/r or LPV/r QD monotherapy vs maintaining a PI/r-based antiretroviral regimen in persons with suppressed HIV replication                                                                                                                                             |
| 388                                                                                                                                       | Reeves                         | 2014 | Renal safety profile of STB in virologically suppressed subjects from two randomized phase 3b switch trials                                                                                                                                                                                 |
| 389                                                                                                                                       | Rokx                           | 2014 | The efficacy, pharmacokinetics, safety and cardiovascular risks of switching nevirapine to rilpivirine in HIV-1 patients: the RPV switch study                                                                                                                                              |
| 390                                                                                                                                       | Brown                          | 2014 | Bone Density Changes After Antiretroviral Initiation With Protease Inhibitors or Raltegravir                                                                                                                                                                                                |
| 391                                                                                                                                       | Cheret                         | 2014 | Paradoxical Impact of Maraviroc/Raltegravir Added To HAART in Acute HIV Infection: ANRS 147 Trial                                                                                                                                                                                           |
| 392                                                                                                                                       | Koulla-Shiro                   | 2014 | Randomized Comparison of Three Second Line ART Regimens in Africa: the 2 Lady/ANRS/EDCTP Study                                                                                                                                                                                              |
| 393                                                                                                                                       | Landovitz                      | 2014 | Efficacy and Tolerability of Atazanavir, Raltegravir, or Darunavir With FTC/Tenofovir: ACTG 5257                                                                                                                                                                                            |
| 394                                                                                                                                       | Margolis                       | 2014 | 744 and Rilpivirine as Two-Drug Oral Maintenance Therapy: IAI116482 (LATTE) Week 48 Results                                                                                                                                                                                                 |
| 395                                                                                                                                       | Murphy                         | 2014 | Elvite gravir/Cobicistat/Emtricitabine/Tenofovir DF (STB) has durable efficacy and differentiated safety compared to atazanavir boosted by ritonavir plus emtricitabine/Tenofovir DF at week 144 in treatment-naïve HIV-1 infected patients                                                 |
| 396                                                                                                                                       | Musiime                        | 2014 | The Effect of Long-Term Zidovudine On Hematological Parameters in the ARROW Randomized Trial                                                                                                                                                                                                |
| 397                                                                                                                                       | Nathan                         | 2014 | Long-term efficacy and safety of elvitegravir/cobicistat/emtricitabine/tenofovir DF versus atazanavir plus ritonavir plus emtricitabine/tenofovir                                                                                                                                           |
| 398                                                                                                                                       | O'Halloran                     | 2014 | Effect of Switch From Abacavir To Tenofovir DF On Platelet Function Markers: a SWIFT Trial Substudy                                                                                                                                                                                         |
| 399                                                                                                                                       | Paton                          | 2014 | Randomised Controlled Trial of a PI Monotherapy Switch Strategy for Long-Term HIV Management                                                                                                                                                                                                |
| 400                                                                                                                                       | Raffi                          | 2014 | First-Line RAL + DRV/r Is Non-Inferior To TDF/FTC + DRV/r: the NEAT001/ANRS143 Randomised Trial                                                                                                                                                                                             |
| 401                                                                                                                                       | Romo                           | 2014 | Renal and Metabolic Safety of Initial HIV-1 Therapy in Resource-Limited Settings                                                                                                                                                                                                            |
| 402                                                                                                                                       | Saeedi                         | 2014 | Outcomes of Unboosting Atazanavir (ATZ) in Regimens with a Tenofovir (TDF) backbone                                                                                                                                                                                                         |
| 403                                                                                                                                       | Taejaroenkul                   | 2014 | Randomized Comparison of Anthropometric Outcomes On EFV-Based Antiretroviral Therapies                                                                                                                                                                                                      |
| 404                                                                                                                                       | Trevillyan                     | 2014 | Antiretroviral Therapy Is Associated With Significant Changes in Plasma Lipidome                                                                                                                                                                                                            |
| 405                                                                                                                                       | Trevor                         | 2014 | Elvitegravir/cobicistat/emtricitabine/tenofovir DF demonstrates durable efficacy and safety versus efavirenz/emtricitabine/tenofovir DF at Week 144                                                                                                                                         |
| 406                                                                                                                                       | Trottier                       | 2014 | Star study : single tablet regimen Rilpivirine/Emtricitabine/Tenofovir DF maintains non-inferiority to Efavirenz/Emtricitabine/Tenofovir DF in ART-naïve adults through week 96                                                                                                             |

**Table S4 – List of excluded studies by exclusion reason (continuation)**

| Studies excluded because they were not randomized controlled clinical trials or performed a joint analysis of two or more clinical trials |                                |      |                                                                                                                                                                                                                                                            |
|-------------------------------------------------------------------------------------------------------------------------------------------|--------------------------------|------|------------------------------------------------------------------------------------------------------------------------------------------------------------------------------------------------------------------------------------------------------------|
| Amount                                                                                                                                    | First author or research group | Year | Title                                                                                                                                                                                                                                                      |
| 407                                                                                                                                       | Walmsley                       | 2014 | Dolutegravir Regimen Statistically Superior To Tenofovir/Emtricitabine/Efavirenz: 96-Wk Data                                                                                                                                                               |
| 408                                                                                                                                       | Wohl                           | 2014 | A Randomized, Double-Blind Comparison of Single-Tablet Regimen Elvitegravir/Cobicistat/Emtricitabine/Tenofovir DF Versus Single-Tablet Regimen Efavirenz/Emtricitabine/Tenofovir DF for Initial Treatment of HIV-1 Infection: analysis of Week 144 Results |
| 409                                                                                                                                       | Lataillade                     | 2014 | HIV-1 attachment inhibitor prodrug BMS-663068 in antiretroviral-experienced subjects: Primary week 24 analysis of emergent drug resistance                                                                                                                 |
| 410                                                                                                                                       | Fisher                         | 2014 | Safety and efficacy of lopinavir/ritonavir-containing antiretroviral therapy in patients aged <50 versus >50 years from randomized trials                                                                                                                  |
| 411                                                                                                                                       | NR                             | 2014 | [Initial HIV therapy. ACTG 5257: convincing results for raltegravir compared with protease inhibitors]                                                                                                                                                     |
| 412                                                                                                                                       | NR                             | 2014 | [As simple and as compatible as possible. HIV patients profit from single tablet regimen]                                                                                                                                                                  |
| 413                                                                                                                                       | Trevor                         | 2014 | STaR: Single tablet regimen RPV/FTC/TDF is safe and well tolerated compared to EVF/FTC/TDF in ART-naïve Latinos at week 96                                                                                                                                 |
| 414                                                                                                                                       | Boyd                           | 2015 | Body composition outcomes at 96 weeks in the second-line RCT DXA substudy                                                                                                                                                                                  |
| 415                                                                                                                                       | Anabwani                       | 2015 | Nevirapine extended-release formulation tablets in HIV-1-infected children: long-term follow-up                                                                                                                                                            |
| 416                                                                                                                                       | Azvolinsky                     | 2015 | First-in-class HIV drug enters phase 3 trials                                                                                                                                                                                                              |
| 417                                                                                                                                       | Sax                            | 2015 | Tenofovir alafenamide versus tenofovir disoproxil fumarate, coformulated with elvitegravir, cobicistat, and emtricitabine, for initial treatment of HIV-1 infection: two randomised, double-blind, phase 3, non-inferiority trials                         |
| 418                                                                                                                                       | Wanga                          | 2015 | Genomewide association study of tenofovir pharmacokinetics and creatinine clearance in AIDS Clinical Trials Group protocol A5202                                                                                                                           |
| 419                                                                                                                                       | Nachman                        | 2015 | Pharmacokinetics and 48-Week Safety and Efficacy of Raltegravir for Oral Suspension in Human Immunodeficiency Virus Type-1-Infected Children 4 Weeks to 2 Years of Age                                                                                     |
| 420                                                                                                                                       | Pozniak                        | 2015 | Switch to STRIBILD from NNRTI plus FTC/TDF regimens maintains HIV suppression and is well-tolerated: week 96 results of STRATEGY-NNRTI (Study 121)                                                                                                         |
| 421                                                                                                                                       | Cournil                        | 2015 | Metabolic changes and second-line ART in Africa (2LADY/ANRS 12169 trial)                                                                                                                                                                                   |
| 422                                                                                                                                       | DeJesus                        | 2015 | Renal and bone safety of tenofovir alafenamide versus tenofovir disoproxil fumarate                                                                                                                                                                        |
| 423                                                                                                                                       | DeJesus                        | 2015 | Tenofovir alafenamide in a single-tablet regimen in initial HIV-1 therapy                                                                                                                                                                                  |
| 424                                                                                                                                       | Gatell                         | 2015 | Efficacy and safety of doravirine 100 mg QD vs. efavirenz 600 mg QD with TDF/FTC in ART-naive HIV-infected patients: week 24 results                                                                                                                       |
| 425                                                                                                                                       | Hamzah                         | 2015 | Favourable effect on vitamin D and bone after switching from Atripla to darunavir/ritonavir: a randomised controlled clinical trial                                                                                                                        |
| 426                                                                                                                                       | Kroidl                         | 2015 | 24-weeks virologic efficacy of fozivudine in ART-naive patients from Africa                                                                                                                                                                                |
| 427                                                                                                                                       | Naidoo                         | 2015 | Randomized controlled trial on ART outcomes in tenofovir gel trial seroconvertors                                                                                                                                                                          |
| 428                                                                                                                                       | Saez-Llorens                   | 2015 | Efficacy and safety of long-term tenofovir DF (TDF) therapy in HIV-infected children                                                                                                                                                                       |
| 429                                                                                                                                       | Thompson                       | 2015 | Attachment inhibitor prodrug BMS-663068 in ARV-experienced subjects: week 48 analysis                                                                                                                                                                      |

**Table S4 – List of excluded studies by exclusion reason (continuation)**

| Studies excluded because they were not randomized controlled clinical trials or performed a joint analysis of two or more clinical trials |                                |      |                                                                                                                                                                                                                                                                                                                            |
|-------------------------------------------------------------------------------------------------------------------------------------------|--------------------------------|------|----------------------------------------------------------------------------------------------------------------------------------------------------------------------------------------------------------------------------------------------------------------------------------------------------------------------------|
| Amount                                                                                                                                    | First author or research group | Year | Title                                                                                                                                                                                                                                                                                                                      |
| 430                                                                                                                                       | Custodio                       | 2015 | Tenofovir (TFV) alafenamide (TAF) dose in the first pibased single tablet regimen (STR) darunavir/cobicistat/emtricitabine/TAF (DRV/COBI/FTC/TAF; D/C/F/TAF)                                                                                                                                                               |
| 431                                                                                                                                       | Klassen                        | 2016 | Associations between vitamin D metabolites, antiretroviral therapy and bone mineral density in people with HIV                                                                                                                                                                                                             |
| 432                                                                                                                                       | Gagliardini                    | 2016 | Simplification to atazanavir/ritonavir+lamivudine versus maintaining atazanavir/ritonavir+2NRTIs in virologically suppressed HIV-infected patients: 96-week data of the ATLAS-M trial                                                                                                                                      |
| 433                                                                                                                                       | Granados-Reyes                 | 2016 | HIV-1 attachment inhibitor prodrug BMS-663068 in antiretroviral-experienced subjects: week 96 subgroup analysis                                                                                                                                                                                                            |
| 434                                                                                                                                       | Hagins                         | 2016 | fficacy of Dolutegravir/Abacavir/Lamivudine (DTG/ABC/3TC) Fixed-Dose Combination (FDC) Compared With Ritonavir-Boosted Atazanavir (ATV/r) Plus Tenofovir Disoproxil Fumarate/Emtricitabine (TDF/FTC) in Treatment-Naive Women With Human Immunodeficiency Virus (HIV)-1 Infection (ARIA Study): Analyses by Race Subgroups |
| 435                                                                                                                                       | Giaquinto                      | 2016 | Pharmacokinetics, safety and efficacy of maraviroc in pediatric patients with R5 HIV                                                                                                                                                                                                                                       |
| 436                                                                                                                                       | Perez-Valero                   | 2016 | Neurocognitive safety after 96-wks on ATV/r+3TC: results of the randomized salt trial                                                                                                                                                                                                                                      |
| 437                                                                                                                                       | Huhn                           | 2016 | Strategic simplification: the efficacy and safety of switching to elvitegravir/cobicistat/emtricitabine/tenofovir alafenamide (E/C/F/TAF) plus darunavir (DRV) in treatment-experienced HIV-1 infected adults (NCT01968551)                                                                                                |
| 438                                                                                                                                       | Arenas-Pinto                   | 2016 | Increased risk of suicidal behaviour with use of efavirenz: Results from the START trial                                                                                                                                                                                                                                   |
| 439                                                                                                                                       | Bracchi                        | 2016 | Multicentre open-label pilot study of switching from efavirenz to dolutegravir for central nervous system (CNS) toxicity                                                                                                                                                                                                   |
| 440                                                                                                                                       | Choi                           | 2016 | Efficacy and Safety of Elvitegravir/Cobicistat/Emtricitabine/Tenofovir Disoproxil Fumarate in Asian Subjects with Human Immunodeficiency Virus 1 Infection: A Sub-Analysis of Phase 3 Clinical Trials                                                                                                                      |
| 441                                                                                                                                       | Ciaffi                         | 2016 | Dual therapy with a boosted protease inhibitor plus lamivudine is an effective maintenance strategy in patients on second-line antiretroviral therapy in Africa: the ANRS 12286/MOBIDIP trial                                                                                                                              |
| 442                                                                                                                                       | Clarke                         | 2016 | A randomized, double-blind comparison of tenofovir alafenamide (TAF) vs tenofovir disoproxil fumarate (TDF), each coformulated with elvitegravir, cobicistat and emtricitabine (E/C/F) for initial HIV-1 treatment: week 96 results                                                                                        |
| 443                                                                                                                                       | Daar                           | 2016 | Efficacy and safety of tenofovir alafenamide versus tenofovir disoproxil fumarate in human immunodeficiency virus (HIV)-infected, virologically suppressed older adults: subgroup analysis of a randomized, double-blind switch study                                                                                      |
| 444                                                                                                                                       | Waters                         | 2016 | Renal safety of tenofovir alafenamide in patients at high risk of kidney disease                                                                                                                                                                                                                                           |
| 445                                                                                                                                       | Johnson                        | 2016 | Efficacy of dolutegravir/abacavir/lamivudine (DTG/ABC/ 3TC) fixed-dose combination (FDC) compared with ritonavir-boosted atazanavir (ATV/r) plus tenofovir disoproxil fumarate/emtricitabine (TDF/FTC) in treatment-naïve women with HIV-1 infection (ARIA study): subgroup analyses                                       |
| 446                                                                                                                                       | Keegan                         | 2016 | Tryptophan metabolism and its relationship with central nervous system toxicity in subjects switching from efavirenz to dolutegravir                                                                                                                                                                                       |

**Table S4 – List of excluded studies by exclusion reason (continuation)**

| Studies excluded because they were not randomized controlled clinical trials or performed a joint analysis of two or more clinical trials |                                |      |                                                                                                                                                                                                                                                                               |
|-------------------------------------------------------------------------------------------------------------------------------------------|--------------------------------|------|-------------------------------------------------------------------------------------------------------------------------------------------------------------------------------------------------------------------------------------------------------------------------------|
| Amount                                                                                                                                    | First author or research group | Year | Title                                                                                                                                                                                                                                                                         |
| 447                                                                                                                                       | Kityo                          | 2016 | 12-week raltegravir-intensified quadruple therapy versus triple first-line ART reduces viral load more rapidly but does not reduce mortality in severely immunosuppressed African HIV-infected adults and older children: the REALITY trial                                   |
| 448                                                                                                                                       | Kravchenko                     | 2016 | Safety and antiviral effect of Elpida (VM-1500), a novel NNRTI (+Truvada) in treatment-naïve HIV-1-infected patients at 24- to 48-week therapy                                                                                                                                |
| 449                                                                                                                                       | Lee                            | 2016 | Post-prandial lipid effects of raltegravir versus darunavir/ritonavir in HIV-1-infected adults commencing combination ART                                                                                                                                                     |
| 450                                                                                                                                       | Llibre                         | 2016 | An Indirect Comparison of Efficacy and Safety of Elvitegravir/Cobicistat/Emtricitabine/Tenofovir Disoproxil Fumarate and Abacavir/Lamivudine + Dolutegravir in Initial Therapy                                                                                                |
| 451                                                                                                                                       | Munderi                        | 2016 | SALIF trial: switching suppressed first-line patients to tenofovir/emtricitabine/rilpivirine (TDF/FTC/RPV) is non-inferior to TDF/FTC/efavirenz (TDF/FTC/EFV) and could be an alternative treatment option in LMICs                                                           |
| 452                                                                                                                                       | Oka                            | 2016 | Efficacy and safety of tenofovir alafenamide versus tenofovir disoproxil fumarate in treatment-naïve Asian adults                                                                                                                                                             |
| 453                                                                                                                                       | Orkin                          | 2016 | Switching tenofovir disoproxil fumarate to tenofovir alafenamide in virologically suppressed adults                                                                                                                                                                           |
| 454                                                                                                                                       | Orkin                          | 2016 | Switching from rilpivirine/emtricitabine/tenofovir disoproxil fumarate (RPV/FTC/TDF) to rilpivirine/emtricitabine/tenofovir alafenamide (RPV/FTC/TAF): safety and efficacy through 48 weeks                                                                                   |
| 455                                                                                                                                       | Orrell                         | 2016 | Superior efficacy of dolutegravir/abacavir/lamivudine (DTG/ABC/3TC) fixed dose combination (FDC) compared with ritonavir (RTV) boosted atazanavir (ATV) plus tenofovir disoproxil fumarate/emtricitabine (TDF/FTC) in treatment naïve women with HIV-1 infection (ARIA Study) |
| 456                                                                                                                                       | Paton                          | 2016 | The Protease Inhibitor Monotherapy Versus Ongoing Triple Therapy (PIVOT) trial: a randomised controlled trial of a protease inhibitor monotherapy strategy for long-term management of human immunodeficiency virus infection                                                 |
| 457                                                                                                                                       | Prakash                        | 2016 | Safety and efficacy of dolutegravir and maraviroc plus background regimen in HIV-1 treatment-experienced participants                                                                                                                                                         |
| 458                                                                                                                                       | Pulido                         | 2016 | Non-inferiority of dual-therapy (DT) with darunavir/ ritonavir (DRV/r) plus 3TC versus triple-therapy (TT) with DRV/r plus TDF/FTC or ABC/3TC for maintenance of viral suppression: 48-week results of the DUAL-GESIDA 8014 trial                                             |
| 459                                                                                                                                       | Quercia                        | 2016 | Psychiatric adverse events from the DTG ART-naïve phase 3 clinical trials                                                                                                                                                                                                     |
| 460                                                                                                                                       | Raffi                          | 2016 | Long-term (96-week) efficacy and safety after switching from tenofovir disoproxil fumarate (TDF) to tenofovir alafenamide (TAF) in HIV-infected, virologically suppressed adults                                                                                              |
| 461                                                                                                                                       | Ciccarelli                     | 2016 | Cns safety of simplification to ATV/r+3TC in virologically suppressed HIV+ patients                                                                                                                                                                                           |
| 462                                                                                                                                       | D'Avino                        | 2016 | Bone-mineral density after switching to ATV/R+3TC: a substudy of the AtLaS-M trial                                                                                                                                                                                            |
| 463                                                                                                                                       | DeJesus                        | 2016 | Attachment inhibitor prodrug BMS-663068 in arv-experienced subjects: week 96 analysis                                                                                                                                                                                         |
| 464                                                                                                                                       | Gallant                        | 2016 | Switching tenofovir DF to tenofovir alafenamide in virologically suppressed adults                                                                                                                                                                                            |
| 465                                                                                                                                       | Gatell                         | 2016 | Doravirine 100mg QD vs efavirenz +TDF/FTC in ART-naïve HIV+ patients: week 48 results                                                                                                                                                                                         |

**Table S4 – List of excluded studies by exclusion reason (continuation)**

| Studies excluded because they were not randomized controlled clinical trials or performed a joint analysis of two or more clinical trials |                                |      |                                                                                                                                                                                                                                                  |
|-------------------------------------------------------------------------------------------------------------------------------------------|--------------------------------|------|--------------------------------------------------------------------------------------------------------------------------------------------------------------------------------------------------------------------------------------------------|
| Amount                                                                                                                                    | First author or research group | Year | Title                                                                                                                                                                                                                                            |
| 466                                                                                                                                       | Koenig                         | 2016 | Improved safety and efficacy of TAF versus TDF singletablet regimen in HIV-1 treatment-naïve women through week 48                                                                                                                               |
| 467                                                                                                                                       | La Rosa                        | 2016 | ACTG 5273 randomized trial of second-line art supports who guidance                                                                                                                                                                              |
| 468                                                                                                                                       | Margolis                       | 2016 | Cabotegravir+rilpivirine as long-acting maintenance therapy: latte-2 week 32 results                                                                                                                                                             |
| 469                                                                                                                                       | Ribaudo                        | 2016 | Gender and racial disparities in initial antiretroviral treatment outcome: ACTG A5257                                                                                                                                                            |
| 470                                                                                                                                       | Rijnders                       | 2016 | Longer-term renal safety of tenofovir alafenamide vs tenofovir disoproxil fumarate                                                                                                                                                               |
| 471                                                                                                                                       | Scherrer                       | 2016 | Early evidence of antiviral activity and safety of ABX464 in HIV treatment-naïve patients                                                                                                                                                        |
| 472                                                                                                                                       | Villanueva                     | 2016 | Influence of age on outcomes in HIV-positive adults initiating tenofovir alafenamide fumarate (TAF) versus tenofovir disoproxil fumarate (TDF) with elvitegravir, cobicistat and emtricitabine (E/C/F/TAF vs. E/C/F/TDF)                         |
| 473                                                                                                                                       | Shah                           | 2016 | Effectiveness and safety of combination of antiretroviral therapy in HIV-1 infected patients in western India                                                                                                                                    |
| 474                                                                                                                                       | NR                             | 2016 | Genvoya--a new 4-drug combination for HIV                                                                                                                                                                                                        |
| 475                                                                                                                                       | Flamm                          | 2017 | Efficacy and safety of tenofovir alafenamide vs. tenofovir disoproxil fumarate in HIV-infected, virologically suppressed black and non-blacks adults through week 96: subgroup analysis of a randomized switch study                             |
| 476                                                                                                                                       | Arribas                        | 2017 | A Randomized, Double-Blind Comparison of Tenofovir Alafenamide (TAF) vs. Tenofovir Disoproxil fumarate (TDF), Each Coformulated with Elvitegravir, Cobicistat, and Emtricitabine (E/C/F) for Initial HIV-1 Treatment: week 144 Results           |
| 477                                                                                                                                       | Clarke                         | 2017 | Significant efficacy and long term safety difference with TAF-based STR in naive adults                                                                                                                                                          |
| 478                                                                                                                                       | Lombardi                       | 2017 | Evolution of blood-associated HIV-1 DNA levels after 48 weeks of switching to atazanavir/ritonavir+lamivudine dual therapy versus continuing triple therapy in the randomized AtLaS-M trial                                                      |
| 479                                                                                                                                       | Nakamoto                       | 2017 | [Pharmacological properties and clinical findings of new drugs for the treatment of HIV-1, FTC/TAF 200/10 and 200/25 mg (Descovy(®) Combination Tablet LT and HT)]                                                                               |
| 480                                                                                                                                       | Okoli                          | 2017 | Safety and efficacy of dolutegravir in treatment naive patients, 50 years and over: subgroup analysis of 48-week results from SPRING-2, SINGLE, FLAMINGO and ARIA                                                                                |
| 481                                                                                                                                       | Orkin                          | 2017 | Switching from efavirenz/emtricitabine/tenofovir (EFV/FTC/ TDF) or rilpivirine/emtricitabine/tenofovir disoproxil fumarate (RPV/FTC/TDF) to rilpivirine/emtricitabine/ tenofovir alafenamide (RPV/FTC/TAF): safety and efficacy through 48 weeks |
| 482                                                                                                                                       | Payne                          | 2017 | Does efavirenz replacement improve neurological function in treated HIV infection?                                                                                                                                                               |
| 483                                                                                                                                       | Murphy                         | 2017 | Elsulfavirine as compared to efavirenz in combination with TDF/FTC: 48-week study                                                                                                                                                                |
| 484                                                                                                                                       | Bracchi                        | 2017 | A randomized comparison of integrase inhibitors with TDF/FTC on renal markers                                                                                                                                                                    |
| 485                                                                                                                                       | Hodder                         | 2017 | Efficacy and safety of switching to EVG/COBI/ FTC/TAF in virologically suppressed women                                                                                                                                                          |
| 486                                                                                                                                       | Hodder                         | 2017 | Efficacy & safety of switching to EVG/COBI/FTC/TAF in virologically suppressed women                                                                                                                                                             |
| 487                                                                                                                                       | Lombardi                       | 2017 | Cellular HIV-1 DNA levels after 96 weeks of switch to ATV/R +3TC in the AtLas-M trial                                                                                                                                                            |

**Table S4 – List of excluded studies by exclusion reason (continuation)**

| Studies excluded because they were not randomized controlled clinical trials or performed a joint analysis of two or more clinical trials |                                |      |                                                                                                                                                                                                                                                                                                                                                                                                      |
|-------------------------------------------------------------------------------------------------------------------------------------------|--------------------------------|------|------------------------------------------------------------------------------------------------------------------------------------------------------------------------------------------------------------------------------------------------------------------------------------------------------------------------------------------------------------------------------------------------------|
| Amount                                                                                                                                    | First author or research group | Year | Title                                                                                                                                                                                                                                                                                                                                                                                                |
| 488                                                                                                                                       | Molina                         | 2017 | Doravirine is non-inferior to darunavir/r in phase 3 treatment-naïve trial at week 48                                                                                                                                                                                                                                                                                                                |
| 489                                                                                                                                       | Sax                            | 2017 | Randomized trial of bicitegravir or dolutegravir with FTC/TAF for initial HIV therapy                                                                                                                                                                                                                                                                                                                |
| 490                                                                                                                                       | Ward                           | 2017 | Week 96 efficacy and safety of tenofovir alafenamide (TAF) versus tenofovir disoproxil fumarate (TDF) in older, hivinfected treatment-naïve adults                                                                                                                                                                                                                                                   |
| 491                                                                                                                                       | Eron                           | 2018 | Efficacy and Safety of Switching From Boosted-Protease Inhibitors (bPI) Plus Emtricitabine/Tenofovir Disoproxil Fumarate (F/TDF) Regimens to the Once Daily (QD), Single-Tablet Regimen (STR) of Darunavir/Cobicistat/Emtricitabine/ Tenofovir Alafenamide (D/C/F/TAF) in Virologically Suppressed, HIV-1-Infected Adults: Week 96 Results of the Phase 3, Randomized, Non-Inferiority EMERALD Trial |
| 492                                                                                                                                       | Funderburg                     | 2018 | Virally suppressed plh switching from abacavir to tenofovir alafenamide did not have changes in immune activation or inflammation                                                                                                                                                                                                                                                                    |
| 493                                                                                                                                       | Hagins                         | 2018 | Switching to coformulated rilpivirine (RPV), emtricitabine (FTC) and tenofovir alafenamide from either RPV, FTC and tenofovir disoproxil fumarate (TDF) or efavirenz, FTC and TDF: 96-week results from two randomized clinical trials                                                                                                                                                               |
| 494                                                                                                                                       | Hodder                         | 2018 | Brief Report: Efficacy and Safety of Switching to Coformulated Elvitegravir, Cobicistat, Emtricitabine, and Tenofovir Alafenamide (E/C/F/TAF) in Virologically Suppressed Women                                                                                                                                                                                                                      |
| 495                                                                                                                                       | Grinsztejn                     | 2018 | Results of ACTG A5288: a strategy study in RLS for 3rd-line ART candidates                                                                                                                                                                                                                                                                                                                           |
| 496                                                                                                                                       | Kozal                          | 2018 | Week-24 safety of fostemsavir in heavily treatment-experienced participants with HIV-1 (Study 205888, formerly AI438-047)                                                                                                                                                                                                                                                                            |
| 497                                                                                                                                       | Puerto                         | 2018 | Symtuza® (DRV/c/FTC/TAF) in the management of previously treated patients                                                                                                                                                                                                                                                                                                                            |
| 498                                                                                                                                       | Aboud                          | 2018 | Superior efficacy of dolutegravir (DTG) plus two nucleoside reverse transcriptase inhibitors (NRTIs) compared with lopi-navir/ritonavir (LPV/RTV) plus two NRTIs in second-line treatment: interim data from the DAWNING study                                                                                                                                                                       |
| 499                                                                                                                                       | Bhagwat                        | 2018 | Changes in Waist Circumference in HIV-Infected Individuals Initiating a Raltegravir or Protease Inhibitor Regimen: Effects of Sex and Race                                                                                                                                                                                                                                                           |
| 500                                                                                                                                       | Braun                          | 2018 | Simplification to dolutegravir monotherapy is non-inferior compared to continuation of combination antiretroviral therapy in patients who initiated combination antiretroviral therapy during primary HIV infection: a randomized, controlled, non-inferiority                                                                                                                                       |
| 501                                                                                                                                       | Cahn                           | 2018 | Non-inferior efficacy of dolutegravir (DTG) plus lamivudine (3TC) versus DTG plus tenofovir/emtricitabine (TDF/FTC) fixed-dose combination in antiretroviral treatment-naïve adults with HIV-1 infection-48-week results from the GEMINI studies                                                                                                                                                     |
| 502                                                                                                                                       | Cournil                        | 2018 | Dolutegravir-versus an efavirenz 400 mg-based regimen for the initial treatment of HIV-infected patients in Cameroon: 48-week efficacy results of the NAMSAL ANRS 12313 trial                                                                                                                                                                                                                        |
| 503                                                                                                                                       | Daar                           | 2018 | Phase 3, randomised, controlled trial of switching to fixed-dose bicitegravir/emtricitabine/tenofovir alafenamide (B/F/TAF) from boosted protease inhibitor-based regimens in virologically suppressed adults: week 48 results                                                                                                                                                                       |
| 504                                                                                                                                       | Spinner                        | 2018 | Darunavir/cobicistat/emtricitabine/tenofovir alafenamide in HIV-1 treatment naïve patients: Week 48 results in subgroups based on baseline viral load, CD4+ count, and WHO clinical staging                                                                                                                                                                                                          |

**Table S4 – List of excluded studies by exclusion reason (continuation)**

| Studies excluded because they were not randomized controlled clinical trials or performed a joint analysis of two or more clinical trials |                                |      |                                                                                                                                                                                                                                                                 |
|-------------------------------------------------------------------------------------------------------------------------------------------|--------------------------------|------|-----------------------------------------------------------------------------------------------------------------------------------------------------------------------------------------------------------------------------------------------------------------|
| Amount                                                                                                                                    | First author or research group | Year | Title                                                                                                                                                                                                                                                           |
| 505                                                                                                                                       | Strehlau                       | 2018 | Substituting Abacavir for Stavudine in Children Who Are Virally Suppressed Without Lipodystrophy: Randomized Clinical Trial in Johannesburg, South Africa                                                                                                       |
| 506                                                                                                                                       | Taiwo                          | 2018 | Dolutegravir Plus Lamivudine Maintains Human Immunodeficiency Virus-1 Suppression Through Week 48 in a Pilot Randomized Trial                                                                                                                                   |
| 507                                                                                                                                       | Trevillyan                     | 2018 | Changes in plasma lipidome following initiation of antiretroviral therapy                                                                                                                                                                                       |
| 508                                                                                                                                       | Llibre                         | 2018 | Efficacy, safety, and tolerability of dolutegravir-rilpivirine for the maintenance of virological suppression in adults with HIV-1: phase 3, randomised, non-inferiority SWORD-1 and SWORD-2 studies                                                            |
| 509                                                                                                                                       | Maggiolo                       | 2018 | Effect of age on efficacy and safety of elvitegravir, cobicistat, emtricitabine and tenofovir alafenamide (E/C/F/TAF) in virologically-suppressed, HIV-1-infected participants aged $\geq 65$ years: Pooled analysis of two Phase III trials                    |
| 510                                                                                                                                       | Maggiolo                       | 2018 | Phase IIIb, randomized, open-label study to evaluate switching from a tenofovir disoproxil fumarate (TDF)-containing regimen to elvitegravir/cobicistat/emtricitabine/tenofovir alafenamide (E/C/F/TAF) in virologically suppressed, HIV-1 infected participant |
| 511                                                                                                                                       | Molina                         | 2018 | Switch to bictegravir/F/TA from DTG and ABC/3TC                                                                                                                                                                                                                 |
| 512                                                                                                                                       | Murray                         | 2018 | Improvements in patient-reported outcomes of dolutegravir (DTG)-based second-line treatment compared to lopinavir/ ritonavir (LPV/r)-based treatment: results from the DAWNING study                                                                            |
| 513                                                                                                                                       | Nicolè                         | 2018 | Darunavir/ritonavir 600/100 mg once daily: it's time for larger non-inferiority randomized trials                                                                                                                                                               |
| 514                                                                                                                                       | Orkin                          | 2018 | Efficacy and safety of the once-daily, darunavir/cobicistat/emtricitabine/tenofovir alafenamide (D/C/F/TAF) singletablet regimen (STR) in ART-naïve, HIV-1-infected adults: AMBER Week 96 results                                                               |
| 515                                                                                                                                       | Orkin                          | 2018 | Doravirine/lamivudine/tenofovir DF continues to be noninferior to efavirenz/emtricitabine/tenofovir DF in treatment-naïve adults with HIV-1 infection: Week 96 results of the DRIVE-AHEAD trial                                                                 |
| 516                                                                                                                                       | Petchkum                       | 2018 | Efficacy of rilpivirine-based regimens as switch therapy from nevirapine-based regimens in HIV-infected patients with complete virological suppression: a randomised controlled trial                                                                           |
| 517                                                                                                                                       | Podzamczar                     | 2018 | B/F/TAF versus ABC/DTG/3TC or DTG + F/TAF in treatment-naïve adults with high baseline viral load or low baseline CD4 count in two Phase III randomized, controlled clinical trials: week 96 results                                                            |
| 518                                                                                                                                       | Lapadula                       | 2018 | No change in neurocognitive function after switching from efavirenz to rilpivirine                                                                                                                                                                              |
| 519                                                                                                                                       | van der Heijden                | 2018 | A switch to a raltegravir containing regimen does not lower platelet reactivity in HIV-infected individuals                                                                                                                                                     |
| 520                                                                                                                                       | Eron                           | 2018 | Analysis of HIV patients switching to D/C/F/TAF by prior ARV treatment experience                                                                                                                                                                               |
| 521                                                                                                                                       | Figueroa                       | 2018 | DRV/R/3TC FDC for HIV-1 treatment-naïve patients: week 48 results of the ANDES study                                                                                                                                                                            |
| 522                                                                                                                                       | Fox                            | 2018 | Phase 3, randomised, controlled trial of switching to fixed-dose bictegravir/emtricitabine/tenofovir alafenamide (B/F/TAF) from boosted protease inhibitor-based regimens in virologically suppressed adults: sub-analysis of week-48 lipid results             |
| 523                                                                                                                                       | Gibb                           | 2018 | Impact of raltegravir intensification of first-line ART on iris in the reality trial                                                                                                                                                                            |
| 524                                                                                                                                       | Huhn                           | 2018 | HIV treatment experienced patients switched to D/C/F/TAF: age, gender, race analyses                                                                                                                                                                            |



**Table S4 – List of excluded studies by exclusion reason (continuation)**

| Studies excluded because they were not randomized controlled clinical trials or performed a joint analysis of two or more clinical trials |                                |      |                                                                                                                                                                                                                                                                                    |
|-------------------------------------------------------------------------------------------------------------------------------------------|--------------------------------|------|------------------------------------------------------------------------------------------------------------------------------------------------------------------------------------------------------------------------------------------------------------------------------------|
| Amount                                                                                                                                    | First author or research group | Year | Title                                                                                                                                                                                                                                                                              |
| 525                                                                                                                                       | Kityo                          | 2018 | Switching to bictegrovir/emtricitabine/tenofovir alafenimide (B/F/TAF) in women                                                                                                                                                                                                    |
| 526                                                                                                                                       | Kityo                          | 2018 | Switching to bictegrovir/emtricitabine/tenofovir alafenamide (B/F/TAF) in women                                                                                                                                                                                                    |
| 527                                                                                                                                       | Kozal                          | 2018 | Phase 3 study of fostemsavir in heavily treatment experienced HIV-1 infected subjects: day 8 and week 24 primary efficacy and safety results (Study 205888, formerly AI438-047)                                                                                                    |
| 528                                                                                                                                       | Mallon                         | 2018 | Platelet function upon switching to tenofovir alafenamide (TAF) verses continuing abacavir (ABC): a randomised substudy OVERRIDE                                                                                                                                                   |
| 529                                                                                                                                       | Mills                          | 2018 | Switching to RPV/FTC/TAF from RPV/FTC/TDF or EFV/FTC/TDF: week 96 results                                                                                                                                                                                                          |
| 530                                                                                                                                       | Orkin                          | 2018 | Similar efficacy & safety by subgroup in drive-ahead: dOR/3TC/TDF versus EFV/FTC/TDF                                                                                                                                                                                               |
| 531                                                                                                                                       | Rashbaum                       | 2018 | Age, gender, and race analyses of D/C/F/TAF in HIV-1 treatment naïve patients                                                                                                                                                                                                      |
| 532                                                                                                                                       | Ustianowski                    | 2018 | Switch to bictegrovir/emtricitabine/tenofovir alafenamide from dolutegravir and abacavir/lamivudine OVERRIDE                                                                                                                                                                       |
| 533                                                                                                                                       | Linares                        | 2018 | Favourable phenotype of LDL particles in subjects with high cardiovascular risk switching from a ritonavir-boosted protease inhibitor to dolutegravir. Results of the NEAT 022 study                                                                                               |
| 534                                                                                                                                       | Gallant                        | 2018 | Week-48 results of AMBER: phase 3, randomised, double-blind trial in antiretroviral treatment (ART)-naïve HIV-1-infected adults to evaluate the efficacy and safety of the once-daily, single-tablet regimen (STR) of darunavir/ cobicistat/emtricitabine/tenof                    |
| 535                                                                                                                                       | Orkin                          | 2018 | Week 48 results of EMERALD: a Phase 3, randomised, non-inferiority study evaluating the efficacy and safety of switching from boosted-protease inhibitors (bPI) plus emtricitabine (FTC)/tenofovir disoproxil fumarate (TDF) regimens to the once daily (QD), s                    |
| 536                                                                                                                                       | Hamzah                         | 2019 | Safety of tenofovir alafenamide (TAF) in patients with a history of proximal renal tubulopathy on tenofovir disoproxil fumarate (TDF)                                                                                                                                              |
| 537                                                                                                                                       | Aboud                          | 2019 | Efficacy and safety of dolutegravir-rilpivirine for maintenance of virological suppression in adults with HIV-1: 100-week data from the randomised, open-label, phase 3 SWORD-1 and SWORD-2 studies                                                                                |
| 538                                                                                                                                       | Ait-Khaled                     | 2019 | Switching to DTG/3TC fixed dose combination (FDC) is noninferior to continuing a TAF-based regimen (TBR) through 48 weeks: subgroup analyses from the TANGO study                                                                                                                  |
| 539                                                                                                                                       | Braun                          | 2019 | Sustained viral suppression with dolutegravir monotherapy during 9,899 patient weeks of follow-up in individuals starting combination antiretroviral therapy during primary HIV infection (EARLY SIMPLIFIED): a randomized, controlled, multi-site, non-inferiority trial          |
| 540                                                                                                                                       | Cahn                           | 2019 | Dolutegravir plus lamivudine versus dolutegravir plus tenofovir disoproxil fumarate and emtricitabine in antiretroviral-naïve adults with HIV-1 infection (GEMINI-1 and GEMINI-2): week 48 results from two multicentre, double-blind, randomised, non-inferiority, phase 3 trials |
| 541                                                                                                                                       | Rossetti                       | 2019 | The Effect of Switching to Maraviroc + Darunavir/Ritonavir Dual Therapy in Virologically Suppressed Patients on the Progression of Liver Fibrosis: Findings From a Randomized Study                                                                                                |
| 542                                                                                                                                       | Stellbrink                     | 2019 | Safety and efficacy of switching from tenofovir disoproxil fumarate to tenofovir alafenamide in people with HIV aged 50 years and older                                                                                                                                            |
| 543                                                                                                                                       | Van Wyk                        | 2019 | Durable efficacy of two-drug regimen (2DR) of dolutegravir (DTG) plus lamivudine (3TC) in antiretroviral treatment-naïve adults with HIV-1 infection at 96 weeks: Subgroup analyses in the gemini studies                                                                          |

**Table S4 – List of excluded studies by exclusion reason (continuation)**

| Studies excluded because they were not randomized controlled clinical trials or performed a joint analysis of two or more clinical trials |                                |      |                                                                                                                                                                                                                                                                 |
|-------------------------------------------------------------------------------------------------------------------------------------------|--------------------------------|------|-----------------------------------------------------------------------------------------------------------------------------------------------------------------------------------------------------------------------------------------------------------------|
| Amount                                                                                                                                    | First author or research group | Year | Title                                                                                                                                                                                                                                                           |
| 544                                                                                                                                       | Van Wyk                        | 2019 | Durable suppression and low rate of virological failures 3 years after switch to DTG+RPV two-drug regimen: SWORD 1 and 2 studies                                                                                                                                |
| 545                                                                                                                                       | Walmsley                       | 2019 | Biologic sex is not the only difference between men and women: data from the Doravirine phase 2/3 clinical trials                                                                                                                                               |
| 546                                                                                                                                       | Kaewpoowat                     | 2019 | Neurocognitive function change after switching from efavirenz to rilpivirine in HIV-infected adults: a randomized control trial                                                                                                                                 |
| 547                                                                                                                                       | Llibre                         | 2019 | SWORD 1&2: maintenance or improvement in renal function in PLWH through 148 weeks after switch to the dolutegravir + rilpivirine 2-drug regimen                                                                                                                 |
| 548                                                                                                                                       | Maggiolo                       | 2019 | Switching to bicitegravir/emtricitabine/tenofovir alafenamide (B/F/TAF) in adults aged >65 or older: Week 48 results from a phase 3b, open-label trial                                                                                                          |
| 549                                                                                                                                       | Margolis                       | 2019 | Long-acting cabotegravir + rilpivirine as maintenance therapy: ATLAS week-48 results                                                                                                                                                                            |
| 550                                                                                                                                       | Molina                         | 2019 | Islatravir efficacy and safety for selected demographic and baseline subgroups from a Phase 2 trial in treatment naïve adults with HIV-1 infection                                                                                                              |
| 551                                                                                                                                       | Molina                         | 2019 | MK-8591 at doses of 0.25 to 2.25 mg QD, in combination with doravirine establishes and maintains viral suppression through 48 weeks in treatment-naïve adults with HIV-1 infection                                                                              |
| 552                                                                                                                                       | Murray                         | 2019 | Patient views on long acting HIV treatment: cabotegravir + rilpivirine as maintenance therapy (ATLAS 48 week results)                                                                                                                                           |
| 553                                                                                                                                       | Okoro                          | 2019 | Evaluation of the different adverse drug reactions (ADR's) and their grade among HIV patient's newly started/substituted on combined tenofovir/lamivudine/dolutegravir (TDF/3TC/DTG) in the two major hospitals in Onitsha metropolis, Anambra state, Nigeria   |
| 554                                                                                                                                       | Orkin                          | 2019 | Long-term efficacy and safety of bicitegravir/emtricitabine/ tenofovir alafenamide (B/F/TAF) in ART-naïve adults                                                                                                                                                |
| 555                                                                                                                                       | Orkin                          | 2019 | Long-active cabotegravir + rilpivirine for HIV maintenance: FLAIR week-48 results                                                                                                                                                                               |
| 556                                                                                                                                       | Pacheco                        | 2019 | Safety and efficacy of triple therapy with Dolutegravir plus 2 NRTIs, in treatment-naïve HIV-2 infected patients-48 weeks results from a phase II study                                                                                                         |
| 557                                                                                                                                       | Perez Valero                   | 2019 | Reversibility of dolutegravir/lamivudine/abacavir neuropsychiatric toxicity after 24 weeks of switching to elvitegravir/cobicistat/emtricitabine/tenofovir-alafenamide (EVG/c/FTC/TAF). The DREAM Clinical Trial                                                |
| 558                                                                                                                                       | Porteiro                       | 2019 | Efficacy of dolutegravir (DTG) plus lamivudine (3TC) versus DTG plus tenofovir/emtricitabine (TDF/FTC) in antiretroviral treatment-naïve adults with HIV-1 infection: 48-week subgroup results from the GEMINI studies in Latin American participants           |
| 559                                                                                                                                       | Quercia                        | 2019 | Outcomes for women in phase 3 trials of long-acting cabotegravir+rilpivirine: pooled ATLAS and FLAIR week 48 results                                                                                                                                            |
| 560                                                                                                                                       | Mora-Peris                     | 2019 | Cerebral function parameters in people living with HIV switching integrase inhibitor                                                                                                                                                                            |
| 561                                                                                                                                       | Songumpai                      | 2019 | Virologic response of switching tenofovir disoproxil fumarate (TDF)-based regimen to abacavir (ABC)-Based Regimen vs. Lopinavir/Ritonavir(LPV/r) Plus Lamivudine(3TC) in HIV-infected patients with tdf-induced nephrotoxicity at 24 Weeks: a prospective, open |
| 562                                                                                                                                       | Thompson                       | 2019 | Long-term safety & efficacy of fostemsavir in treatment experienced HIV participants                                                                                                                                                                            |

**Table S4 – List of excluded studies by exclusion reason (continuation)**

| Studies excluded because they were not randomized controlled clinical trials or performed a joint analysis of two or more clinical trials |                                |      |                                                                                                                                                                                                                                                                                                                                                                                            |
|-------------------------------------------------------------------------------------------------------------------------------------------|--------------------------------|------|--------------------------------------------------------------------------------------------------------------------------------------------------------------------------------------------------------------------------------------------------------------------------------------------------------------------------------------------------------------------------------------------|
| Amount                                                                                                                                    | First author or research group | Year | Title                                                                                                                                                                                                                                                                                                                                                                                      |
| 563                                                                                                                                       | Assoumou                       | 2019 | Impact of the reproductive/hormonal status on weight, fat and insulin resistance in HIV-infected women switching from a PI regimen to dual raltegravir-etravirine therapy: Results from the ANRS163-ETRAL trial at 48 and 96 weeks                                                                                                                                                         |
| 564                                                                                                                                       | NR                             | 2019 | Dolutegravir/lamivudine (Dovato)--a two-drug complete regimen for HIV-1 infection                                                                                                                                                                                                                                                                                                          |
| 565                                                                                                                                       | Eron                           | 2019 | Week 96 efficacy and safety results of the phase 3, randomized EMERALD trial to evaluate switching from boosted-protease inhibitors plus emtricitabine/tenofovir disoproxil fumarate regimens to the once daily, single-tablet regimen of darunavir/cobicistat/emtricitabine/tenofovir alafenamide (D/C/F/TAF) in treatment-experienced, virologically-suppressed adults living with HIV-1 |
| 566                                                                                                                                       | D'Amico                        | 2020 | Safety and efficacy of cabotegravir + rilpivirine long-acting with and without oral lead-in: FLAIR Week 124 results                                                                                                                                                                                                                                                                        |
| 567                                                                                                                                       | DeJesus                        | 2020 | Islatravir safety analysis through week 48 from a phase 2 trial in treatment naïve adults with HIV-1 infection                                                                                                                                                                                                                                                                             |
| 568                                                                                                                                       | Dunn                           | 2020 | Gastrointestinal (GI) adverse events with darunavir/cobicistat/emtricitabine/tenofovir alafenamide (D/C/F/TAF) through Week 96: An EMERALD post-hoc analysis                                                                                                                                                                                                                               |
| 569                                                                                                                                       | Hagins                         | 2020 | Week 48 outcomes from the braave 2020 study: A randomized switch to B/F/TAF in african american adults with hiv                                                                                                                                                                                                                                                                            |
| 570                                                                                                                                       | Krishnaratne                   | 2020 | Stigma and Judgment Toward People Living with HIV and Key Population Groups Among Three Cadres of Health Workers in South Africa and Zambia: analysis of Data from the HPTN 071 (PopART) Trial                                                                                                                                                                                             |
| 571                                                                                                                                       | Avihingsanon                   | 2020 | Third-line antiretroviral therapy including raltegravir, darunavir/ritonavir and/or etravirine is well tolerated and achieves durable virologic suppression over 144 + weeks in resource-limited settings ACTG: A5288 strategy trial                                                                                                                                                       |
| 572                                                                                                                                       | Benn                           | 2020 | Outcomes for women receiving long-acting cabotegravir + rilpivirine monthly and every two months: ATLAS-2M study Week 48 results                                                                                                                                                                                                                                                           |
| 573                                                                                                                                       | Brar                           | 2020 | Long-term follow-up after a switch to bictegravir, emtricitabine, tenofovir alafenamide from dolutegravir, abacavir, lamivudine                                                                                                                                                                                                                                                            |
| 574                                                                                                                                       | Bushen                         | 2020 | Darunavir/cobicistat/emtricitabine/tenofovir alafenamide (D/C/F/TAF) in treatment-naïve (AMBER) and virologically suppressed (EMERALD) patients with neurologic and/or psychiatric comorbidities: week 96 subgroup analysis                                                                                                                                                                |
| 575                                                                                                                                       | Cahn                           | 2020 | Durable efficacy of dolutegravir (DTG) plus lamivudine (3TC) in antiretroviral treatment-naïve adults with HIV-1 infection: 3-year results from the GEMINI studies                                                                                                                                                                                                                         |
| 576                                                                                                                                       | Cahn                           | 2020 | Durable Efficacy of Dolutegravir Plus Lamivudine in Antiretroviral Treatment-Naive Adults With HIV-1 Infection: 96-Week Results From the GEMINI-1 and GEMINI-2 Randomized Clinical Trials                                                                                                                                                                                                  |
| 577                                                                                                                                       | Chounta                        | 2020 | Comparability of 48-week efficacy and safety of cabotegravir + rilpivirine long-acting every 8 weeks to standard of care in suppressed HIV-1-infected patients                                                                                                                                                                                                                             |
| 578                                                                                                                                       | Smith                          | 2020 | Safety, Efficacy, and Durability of Long-Acting CAB and RPV as Maintenance Therapy for HIV-1 Infection: LATTE-2 Week 256 Results                                                                                                                                                                                                                                                           |
| 579                                                                                                                                       | Thompson                       | 2020 | Once-daily Doravirine for Initial Treatment of Adults Living With Human Immunodeficiency Virus-1: An Integrated Safety Analysis                                                                                                                                                                                                                                                            |

**Table S4 – List of excluded studies by exclusion reason (continuation)**

| Studies excluded because they were not randomized controlled clinical trials or performed a joint analysis of two or more clinical trials |                                |      |                                                                                                                                                                                                                                                                                                                                            |
|-------------------------------------------------------------------------------------------------------------------------------------------|--------------------------------|------|--------------------------------------------------------------------------------------------------------------------------------------------------------------------------------------------------------------------------------------------------------------------------------------------------------------------------------------------|
| Amount                                                                                                                                    | First author or research group | Year | Title                                                                                                                                                                                                                                                                                                                                      |
| 580                                                                                                                                       | Venter                         | 2020 | The ADVANCE trial: phase 3, randomised comparison of TAF/FTC+DTG, TDF/FTC+DTG or TDF/FTC/EFV for first-line treatment of HIV-1 infection                                                                                                                                                                                                   |
| 581                                                                                                                                       | Kozal                          | 2020 | Fostemsavir in Adults with Multidrug-Resistant HIV-1 Infection                                                                                                                                                                                                                                                                             |
| 582                                                                                                                                       | Molina                         | 2020 | Islatravir in combination with doravirine maintains HIV-1 viral suppression through 96 weeks                                                                                                                                                                                                                                               |
| 583                                                                                                                                       | Orkin                          | 2020 | Fixed-dose combination bicittegravir, emtricitabine, and tenofovir alafenamide versus dolutegravir-containing regimens for initial treatment of HIV-1 infection: week 144 results from two randomised, double-blind, multicentre, phase 3, non-inferiority trials                                                                          |
| 584                                                                                                                                       | Post                           | 2020 | Renal safety through 96 weeks from a phase II trial (P011) of islatravir and doravirine in treatment-naïve adults with HIV-1                                                                                                                                                                                                               |
| 585                                                                                                                                       | Rockstroh                      | 2020 | Long-term follow-up after a switch to bicittegravir, emtricitabine, tenofovir alafenamide, from a boosted protease inhibitor-based regimen                                                                                                                                                                                                 |
| 586                                                                                                                                       | Rojas                          | 2020 | Switching to dolutegravir plus lamivudine (DTG + 3TC) is non-inferior to and as safe as continuing standard triple antiretroviral therapy (TAR)                                                                                                                                                                                            |
| 587                                                                                                                                       | Daar                           | 2020 | Dose-response relationship of subcutaneous long-acting HIV capsid inhibitor gs-6207                                                                                                                                                                                                                                                        |
| 588                                                                                                                                       | Ibrahim                        | 2020 | Bone mineral density improves in women who switch from TDF/FTC/NNRTI to ABC/3TC/DTG                                                                                                                                                                                                                                                        |
| 589                                                                                                                                       | Assoumou                       | 2020 | Fat gain differs by sex and hormonal status in persons living with suppressed HIV switched to raltegravir/etravirine                                                                                                                                                                                                                       |
| 590                                                                                                                                       | Hagins                         | 2020 | Randomized switch to B/F/TAF in african american adults with HIV                                                                                                                                                                                                                                                                           |
| 591                                                                                                                                       | Samarawickrama                 | 2020 | Increase in bone mineral density and weight in women who switch from TDF/FTC/NNRTI to ABC/3TC/DTG                                                                                                                                                                                                                                          |
| 592                                                                                                                                       | Orkin                          | 2020 | Week 96 results of a phase 3 trial of darunavir/cobicistat/emtricitabine/tenofovir alafenamide in treatment-naïve HIV-1 patients                                                                                                                                                                                                           |
| 593                                                                                                                                       | Huhn                           | 2021 | Week 96 subgroup analyses of the phase 3, randomized AMBER and EMERALD trials evaluating the efficacy and safety of the once daily darunavir/ cobicistat/emtricitabine/tenofovir alafenamide (D/C/F/TAF) single-tablet regimen in antiretroviral treatment (ART)-naïve and -experienced, virologically-suppressed adults living with HIV-1 |
| 594                                                                                                                                       | Gianotti                       | 2021 | Residual viremia in HIV-infected patients who continue a 2-drug or switch to a 3-drug integrase strand transfer inhibitor-based regimen                                                                                                                                                                                                    |
| 595                                                                                                                                       | Erlandson                      | 2021 | Weight Change Following Antiretroviral Therapy Switch in People with Viral Suppression: Pooled Data from Randomized Clinical Trials                                                                                                                                                                                                        |
| Studies excluded because they did not include people with HIV/AIDS                                                                        |                                |      |                                                                                                                                                                                                                                                                                                                                            |
| Amount                                                                                                                                    | First author or research group | Year | Title                                                                                                                                                                                                                                                                                                                                      |
| 1                                                                                                                                         | Raskino                        | 1999 | Neurologic, neurocognitive, and brain growth outcomes in human immunodeficiency virus-infected children receiving different nucleoside antiretroviral regimens. Pediatric AIDS Clinical Trials Group 152 Study Team                                                                                                                        |
| 2                                                                                                                                         | Buss                           | 2001 | Saquinavir and ritonavir pharmacokinetics following combined ritonavir and saquinavir (soft gelatin capsules) administration                                                                                                                                                                                                               |
| 3                                                                                                                                         | Scelsa                         | 2005 | A pilot, double-blind, placebo-controlled trial of indinavir in patients with ALS                                                                                                                                                                                                                                                          |
| 4                                                                                                                                         | Ruel                           | 2014 | Virologic and immunologic outcomes of HIV-infected Ugandan children randomized to lopinavir/ritonavir or nonnucleoside reverse transcriptase inhibitor therapy                                                                                                                                                                             |

**Table S4 – List of excluded studies by exclusion reason (continuation)**

| Studies excluded because they did not include people with HIV/AIDS                                                                     |                                |      |                                                                                                                                                                                                                                                                            |
|----------------------------------------------------------------------------------------------------------------------------------------|--------------------------------|------|----------------------------------------------------------------------------------------------------------------------------------------------------------------------------------------------------------------------------------------------------------------------------|
| Amount                                                                                                                                 | First author or research group | Year | Title                                                                                                                                                                                                                                                                      |
| 5                                                                                                                                      | Abhyankar                      | 2017 | Pharmacokinetics of fixed-dose combination of tenofovir disoproxil fumarate, lamivudine, and efavirenz: results of a randomized, crossover, bioequivalence study                                                                                                           |
| Studies excluded for evaluating ART no longer used in clinical practice or comparing the same ARV regimen initiated at different times |                                |      |                                                                                                                                                                                                                                                                            |
| Amount                                                                                                                                 | First author or research group | Year | Title                                                                                                                                                                                                                                                                      |
| 1                                                                                                                                      | Luthy                          | 1988 | Zidovudine for the treatment of thrombocytopenia associated with human immunodeficiency virus (HIV). A prospective study                                                                                                                                                   |
| 2                                                                                                                                      | Meng                           | 1990 | AIDS Clinical Trials Group: phase I/II study of combination 2',3'-dideoxycytidine and zidovudine in patients with acquired immunodeficiency syndrome (AIDS) and advanced AIDS-related complex                                                                              |
| 3                                                                                                                                      | Hamilton                       | 1992 | A controlled trial of early versus late treatment with zidovudine in symptomatic human immunodeficiency virus infection. Results of the Veterans Affairs Cooperative Study                                                                                                 |
| 4                                                                                                                                      | Kahn                           | 1992 | A controlled trial comparing continued zidovudine with didanosine in human immunodeficiency virus infection. The NIAID AIDS Clinical Trials Group                                                                                                                          |
| 5                                                                                                                                      | Abrams                         | 1994 | Treatment options in zidovudine intolerance or failure                                                                                                                                                                                                                     |
| 6                                                                                                                                      | Abrams                         | 1994 | A comparative trial of didanosine or zalcitabine after treatment with zidovudine in patients with human immunodeficiency virus infection                                                                                                                                   |
| 7                                                                                                                                      | Spruance                       | 1994 | Didanosine compared with continuation of zidovudine in HIV-infected patients with signs of clinical deterioration while receiving zidovudine: A randomized, double-blind clinical trial                                                                                    |
| 8                                                                                                                                      | Spruance                       | 1994 | Didanosine compared with continuation of zidovudine in HIV-infected patients with signs of clinical deterioration while receiving zidovudine: A randomized, double-blind clinical trial                                                                                    |
| 9                                                                                                                                      | Been-Tiktak                    | 1995 | Safety, tolerance, and pharmacokinetics of atevirdine mesylate (U-87201E) in asymptomatic human immunodeficiency virus-infected patients                                                                                                                                   |
| 10                                                                                                                                     | Haubrich                       | 1995 | A randomized trial of the activity and safety of Ro 24-7429 (Tat antagonist) versus nucleoside for human immunodeficiency virus infection. The AIDS Clinical Trials Group 213 Team                                                                                         |
| 11                                                                                                                                     | Ragni                          | 1995 | Randomized study of didanosine monotherapy and combination therapy with zidovudine in hemophilic and nonhemophilic subjects with asymptomatic human immunodeficiency virus-1 infection. AIDS Clinical Trial Groups                                                         |
| 12                                                                                                                                     | Jablonowski                    | 1995 | A dose comparison study of didanosine in patients with very advanced HIV infection who are intolerant to or clinically deteriorate on zidovudine                                                                                                                           |
| 13                                                                                                                                     | Hammer                         | 1996 | A trial comparing nucleoside monotherapy with combination therapy in HIV-infected adults with CD4 cell counts from 200 to 500 per cubic millimeter. AIDS Clinical Trials Group Study 175 Study Team                                                                        |
| 14                                                                                                                                     | Been-Tiktak                    | 1996 | Safety, tolerance, and efficacy of atevirdine in asymptomatic human immunodeficiency virus-infected individuals                                                                                                                                                            |
| 15                                                                                                                                     | Collier                        | 1996 | Treatment of human immunodeficiency virus infection with saquinavir, zidovudine, and zalcitabine. AIDS Clinical Trials Group                                                                                                                                               |
| 16                                                                                                                                     | Saravolatz                     | 1996 | Zidovudine alone or in combination with didanosine or zalcitabine in HIV-infected patients with the acquired immunodeficiency syndrome or fewer than 200 CD4 cells per cubic millimeter. Investigators for the Terry Bein Community Programs for Clinical Research on AIDS |
| 17                                                                                                                                     | Gatell                         | 1996 | Switching from zidovudine to didanosine in patients with symptomatic HIV infection and disease progression. ddi Iberian Study Group                                                                                                                                        |

**Table S4 – List of excluded studies by exclusion reason (continuation)**

| Studies excluded for evaluating ART no longer used in clinical practice or comparing the same ARV regimen initiated at different times |                                |      |                                                                                                                                                                                                                           |
|----------------------------------------------------------------------------------------------------------------------------------------|--------------------------------|------|---------------------------------------------------------------------------------------------------------------------------------------------------------------------------------------------------------------------------|
| Amount                                                                                                                                 | First author or research group | Year | Title                                                                                                                                                                                                                     |
| 18                                                                                                                                     | Vella                          | 1996 | A randomized trial (ISS 901) of switching to didanosine versus continued zidovudine after the diagnosis of AIDS                                                                                                           |
| 19                                                                                                                                     | Darbyshire                     | 1996 | The Alpha trial: European/Australian randomized double-blind trial of two doses of didanosine in zidovudine-intolerant patients with symptomatic HIV disease                                                              |
| 20                                                                                                                                     | Deeks                          | 1997 | The safety and efficacy of adefovir dipivoxil, a novel anti-human immunodeficiency virus (HIV) therapy, in HIV-infected adults: a randomized, double-blind, placebo-controlled trial                                      |
| 21                                                                                                                                     | Florida                        | 1997 | A randomized trial (ISS 902) of didanosine versus zidovudine in previously untreated patients with mildly symptomatic human immunodeficiency virus infection                                                              |
| 22                                                                                                                                     | Gerstoft                       | 1997 | Alternating treatment with didanosine and zidovudine versus either drug alone for the treatment of advanced HIV infection. The Alter Study. Nordic HIV Therapy Group                                                      |
| 23                                                                                                                                     | Cooper                         | 1997 | Randomised trial of addition of lamivudine or lamivudine plus loviride to zidovudine-containing regimens for patients with HIV-1 infection: The CAESAR trial                                                              |
| 24                                                                                                                                     | Fischl                         | 1997 | Safety and antiviral activity of combination therapy with zidovudine, zalcitabine, and two doses of interferon-alpha2a in patients with HIV. AIDS Clinical Trials Group Study 197                                         |
| 25                                                                                                                                     | Spector                        | 1997 | Comparative trial of two dosages of zalcitabine in zidovudine-experienced children with advanced human immunodeficiency virus disease. Pediatric AIDS Clinical Trials Group                                               |
| 26                                                                                                                                     | Keiser                         | 1998 | An open-label pilot study of the efficacy and tolerability of once-daily didanosine versus twice-daily didanosine                                                                                                         |
| 27                                                                                                                                     | Montaner                       | 1998 | A randomized, double-blind trial comparing combinations of nevirapine, didanosine, and zidovudine for HIV-infected patients: the INCAS Trial. Italy, The Netherlands, Canada and Australia Study                          |
| 28                                                                                                                                     | Haubrich                       | 1998 | Improved survival and reduced clinical progression in HIV-infected patients with advanced disease treated with saquinavir plus zalcitabine                                                                                |
| 29                                                                                                                                     | Sadler                         | 1999 | Safety and Pharmacokinetics of Amprenavir (141W94), a Human Immunodeficiency Virus (HIV) Type 1 Protease Inhibitor, following Oral Administration of Single Doses to HIV-Infected Adults                                  |
| 30                                                                                                                                     | Babiker                        | 1999 | A randomized trial comparing regimens of four reverse transcriptase inhibitors given together or cyclically in HIV-1 infection - The Quattro Trial                                                                        |
| 31                                                                                                                                     | Friedland                      | 1999 | Efficacy and safety of delavirdine mesylate with zidovudine and didanosine compared with two-drug combinations of these agents in persons with HIV disease with CD4 counts of 100 to 500 cells/mm <sup>3</sup> (ACTG 261) |
| 32                                                                                                                                     | Haubrich                       | 1999 | A phase II safety and efficacy study of amprenavir in combination with zidovudine and lamivudine in HIV-infected patients with limited antiretroviral experience. Amprenavir PROAB2002 Study Team                         |
| 33                                                                                                                                     | Mobley                         | 1999 | Virological and immunological responses to once-daily dosing of didanosine in combination with stavudine. AI454-143 Team                                                                                                  |
| 34                                                                                                                                     | Monno                          | 1999 | Comparison of once and twice daily dosing of didanosine in combination with stavudine for the treatment of HIV-1 infection. AI 454-146 Team                                                                               |
| 35                                                                                                                                     | Price                          | 1999 | Neurological outcomes in late HIV infection: Adverse impact of neurological impairment on survival and protective effect of antiviral therapy                                                                             |

**Table S4 – List of excluded studies by exclusion reason (continuation)**

| Studies excluded for evaluating ART no longer used in clinical practice or comparing the same ARV regimen initiated at different times |                                |      |                                                                                                                                                                                                                                                       |
|----------------------------------------------------------------------------------------------------------------------------------------|--------------------------------|------|-------------------------------------------------------------------------------------------------------------------------------------------------------------------------------------------------------------------------------------------------------|
| Amount                                                                                                                                 | First author or research group | Year | Title                                                                                                                                                                                                                                                 |
| 36                                                                                                                                     | Molina                         | 1999 | The ALBI trial: A randomized controlled trial comparing stavudine plus didanosine with zidovudine plus lamivudine and a regimen alternating both combinations in previously untreated patients infected with human immunodeficiency virus             |
| 37                                                                                                                                     | Revicki                        | 1999 | Quality of life outcomes of saquinavir, zalcitabine and combination saquinavir plus zalcitabine therapy for adults with advanced HIV infection with CD4 counts between 50 and 300 cells/mm <sup>3</sup>                                               |
| 38                                                                                                                                     | Been-Tiktak                    | 1999 | Efficacy and safety of combination therapy with delavirdine and zidovudine: a European/Australian phase II trial                                                                                                                                      |
| 39                                                                                                                                     | NR                             | 1999 | Amprenavir study results released                                                                                                                                                                                                                     |
| 40                                                                                                                                     | Gatell                         | 1999 | AVANTI 1: randomized, double-blind trial to evaluate the efficacy and safety of zidovudine plus lamivudine versus zidovudine plus lamivudine plus loviride in HIV-infected antiretroviral-naïve patients. AVANTI Study Group                          |
| 41                                                                                                                                     | Para                           | 1999 | ACTG 260: a randomized, phase I-II, dose-ranging trial of the anti-human immunodeficiency virus activity of delavirdine monotherapy                                                                                                                   |
| 42                                                                                                                                     | Gulick                         | 2000 | Randomized study of saquinavir with ritonavir or nelfinavir together with delavirdine, adefovir, or both in human immunodeficiency virus-infected adults with virologic failure on indinavir: AIDS Clinical Trials Group Study 359                    |
| 43                                                                                                                                     | Currier                        | 2000 | Differences between women and men in adverse events and CD4+ responses to nucleoside analogue therapy for HIV infection                                                                                                                               |
| 44                                                                                                                                     | Albrecht                       | 2000 | Effect of lamivudine in HIV-infected persons with prior exposure to zidovudine/didanosine or zidovudine/zalcitabine                                                                                                                                   |
| 45                                                                                                                                     | García                         | 2000 | Comparison of twice-daily stavudine plus once- or twice-daily didanosine and nevirapine in early stages of HIV infection: the scan study                                                                                                              |
| 46                                                                                                                                     | Girard                         | 2000 | Phase II placebo-controlled trial of fozivudine tidoxil for HIV infection: pharmacokinetics, tolerability, and efficacy                                                                                                                               |
| 47                                                                                                                                     | Kazatchkine                    | 2000 | Didanosine dosed once daily is equivalent to twice daily dosing for patients on double or triple combination antiretroviral therapy                                                                                                                   |
| 48                                                                                                                                     | Kroon                          | 2000 | A randomized, double-blind trial of half versus standard dose of zidovudine plus zalcitabine in Thai HIV-1-infected patients (study HIV-NAT 001). HIV Netherlands Australia Thailand Research Collaboration                                           |
| 49                                                                                                                                     | Joly                           | 2000 | Delavirdine in combination with zidovudine in treatment of human immunodeficiency virus type 1-infected patients: evaluation of efficacy and emergence of viral resistance in a randomized, comparative phase III trial. The M/3331/0013B Study Group |
| 50                                                                                                                                     | Nachman                        | 2000 | Nucleoside analogs plus ritonavir in stable antiretroviral therapy-experienced HIV-infected children: a randomized controlled trial. Pediatric AIDS Clinical Trials Group 338 Study Team                                                              |
| 51                                                                                                                                     | Carr                           | 2001 | HIV protease inhibitor substitution in patients with lipodystrophy: a randomized, controlled, open-label, multicentre study                                                                                                                           |
| 52                                                                                                                                     | Fisher                         | 2001 | The safety and efficacy of adefovir dipivoxil in patients with advanced HIV disease: a randomized, placebo-controlled trial                                                                                                                           |
| 53                                                                                                                                     | Arasteh                        | 2001 | GW420867X administered to HIV-1-infected patients alone and in combination with lamivudine and zidovudine                                                                                                                                             |
| 54                                                                                                                                     | Ruiz                           | 2001 | Antiretroviral treatment simplification with nevirapine in protease inhibitor-experienced patients with hiv-associated lipodystrophy: 1-year prospective follow-up of a multicenter, randomized, controlled study                                     |
| 55                                                                                                                                     | Hammer                         | 2002 | Dual vs single protease inhibitor therapy following antiretroviral treatment failure: a randomized trial                                                                                                                                              |

**Table S4 – List of excluded studies by exclusion reason (continuation)**

| Studies excluded for evaluating ART no longer used in clinical practice or comparing the same ARV regimen initiated at different times |                                        |      |                                                                                                                                                                                                  |
|----------------------------------------------------------------------------------------------------------------------------------------|----------------------------------------|------|--------------------------------------------------------------------------------------------------------------------------------------------------------------------------------------------------|
| Amount                                                                                                                                 | First author or research group         | Year | Title                                                                                                                                                                                            |
| 56                                                                                                                                     | ADHOC International Steering Committee | 2002 | A randomized placebo-controlled trial of adefovir dipivoxil in advanced HIV infection: the ADHOC trial                                                                                           |
| 57                                                                                                                                     | Burger                                 | 2003 | Therapeutic drug monitoring of nelfinavir and indinavir in treatment-naive HIV-1-infected individuals                                                                                            |
| 58                                                                                                                                     | Simpson                                | 2003 | Lamotrigine for HIV-associated painful sensory neuropathies: a placebo-controlled trial                                                                                                          |
| 59                                                                                                                                     | Nadler                                 | 2003 | Twice-daily amprenavir 1200 mg versus amprenavir 600 mg/ritonavir 100 mg, in combination with at least 2 other antiretroviral drugs, in HIV-1-infected patients                                  |
| 60                                                                                                                                     | Eron                                   | 2004 | Short-term safety and antiretroviral activity of T-1249, a second-generation fusion inhibitor of HIV                                                                                             |
| 61                                                                                                                                     | Raguin                                 | 2004 | Salvage therapy with amprenavir, lopinavir and ritonavir 200 mg/d or 400 mg/d in HIV-infected patients in virological failure                                                                    |
| 62                                                                                                                                     | Pulido                                 | 2004 | A randomized study investigating the efficacy and safety of amprenavir in combination with low-dose ritonavir in protease inhibitor-experienced HIV-infected adults                              |
| 63                                                                                                                                     | Cardiello                              | 2005 | A prospective, randomized trial of structured treatment interruption for patients with chronic HIV type 1 infection                                                                              |
| 64                                                                                                                                     | Molina                                 | 2005 | Simplification therapy with once-daily emtricitabine, didanosine, and efavirenz in HIV-1-infected adults with viral suppression receiving a protease inhibitor-based regimen: a randomized trial |
| 65                                                                                                                                     | Molina                                 | 2005 | Didanosine in HIV-1-infected patients experiencing failure of antiretroviral therapy: a randomized placebo-controlled trial                                                                      |
| 66                                                                                                                                     | Hernandez                              | 2005 | MexVir 1: comparison of two antiretroviral schemes including nelfinavir in Mexican patients with HIV infection: a national, multicenter, 48-week follow-up                                       |
| 67                                                                                                                                     | Hernandez                              | 2005 | MexVir 1: comparison of two antiretroviral schemes including nelfinavir in Mexican patients with HIV infection: a national, multicenter, 48-week follow-up                                       |
| 68                                                                                                                                     | Ananworanich                           | 2006 | CD4-guided scheduled treatment interruptions compared with continuous therapy for patients infected with HIV-1: results of the Staccato randomised trial                                         |
| 69                                                                                                                                     | Cahn                                   | 2006 | Ritonavir-boosted tipranavir demonstrates superior efficacy to ritonavir-boosted protease inhibitors in treatment-experienced HIV-infected patients: 24-week results of the RESIST-2 trial       |
| 70                                                                                                                                     | Wang                                   | 2006 | Randomized double-blinded and controlled clinical trial on treatment of HIV/AIDS by Zhongyan-4                                                                                                   |
| 71                                                                                                                                     | Cahn                                   | 2006 | Efficacy and tolerability of 10-day monotherapy with apricitabine in antiretroviral-naive, HIV-infected patients                                                                                 |
| 72                                                                                                                                     | Gripshover                             | 2006 | Amdoxovir versus placebo with enfuvirtide plus optimized background therapy for HIV-1-infected subjects failing current therapy (AACTG A5118)                                                    |
| 73                                                                                                                                     | Piketty                                | 2006 | Salvage therapy with atazanavir/ritonavir combined to tenofovir in HIV-infected patients with multiple treatment failures: randomized ANRS 107 trial                                             |
| 74                                                                                                                                     | Sprinz                                 | 2006 | Substitution with lopinavir/ritonavir improves patient-reported outcomes including quality of life in patients who were intolerant to their antiretroviral therapy                               |
| 75                                                                                                                                     | Ghosn                                  | 2007 | Antiviral activity of low-dose alovudine in antiretroviral-experienced patients: results from a 4-week randomized, double-blind, placebo-controlled dose-ranging trial                           |



**Table S4 – List of excluded studies by exclusion reason (continuation)**

| Studies excluded for evaluating ART no longer used in clinical practice or comparing the same ARV regimen initiated at different times |                                |      |                                                                                                                                                                                                                     |
|----------------------------------------------------------------------------------------------------------------------------------------|--------------------------------|------|---------------------------------------------------------------------------------------------------------------------------------------------------------------------------------------------------------------------|
| Amount                                                                                                                                 | First author or research group | Year | Title                                                                                                                                                                                                               |
| 76                                                                                                                                     | Gulick                         | 2007 | Phase 2 study of the safety and efficacy of vicriviroc, a CCR5 inhibitor, in HIV-1-Infected, treatment-experienced patients: AIDS clinical trials group 5211                                                        |
| 77                                                                                                                                     | Winston                        | 2007 | The safety, efficacy, and pharmacokinetic profile of a switch in antiretroviral therapy to saquinavir, ritonavir, and atazanavir alone for 48 weeks and a switch in the saquinavir formulation                      |
| 78                                                                                                                                     | Schürmann                      | 2007 | Antiviral activity, pharmacokinetics and safety of vicriviroc, an oral CCR5 antagonist, during 14-day monotherapy in HIV-infected adults                                                                            |
| 79                                                                                                                                     | Asboe                          | 2007 | A virological benefit from an induction/maintenance strategy: the Forte trial                                                                                                                                       |
| 80                                                                                                                                     | Lowe                           | 2007 | Stavudine but not didanosine as part of HAART contributes to peripheral lipoatrophy: a substudy from the Antiretroviral Regimen Evaluation Study (ARES)                                                             |
| 81                                                                                                                                     | Maitland                       | 2008 | Switching from twice-daily abacavir and lamivudine to the once-daily fixed-dose combination tablet of abacavir and lamivudine improves patient adherence and satisfaction with therapy                              |
| 82                                                                                                                                     | Currier                        | 2008 | Antiviral activity and safety of aplaviroc with lamivudine/zidovudine in HIV-infected, therapy-naïve patients: the ASCENT (CCR102881) study                                                                         |
| 83                                                                                                                                     | Yeni                           | 2009 | Antiviral activity and safety of aplaviroc, a CCR5 antagonist, in combination with lopinavir/ritonavir in HIV-infected, therapy-naïve patients: results of the EPIC study (CCR100136)                               |
| 84                                                                                                                                     | Fätkenheuer                    | 2009 | Activity, pharmacokinetics and safety of lersivirine (UK-453,061), a next-generation nonnucleoside reverse transcriptase inhibitor, during 7-day monotherapy in HIV-1-infected patients                             |
| 85                                                                                                                                     | Gutiérrez-Valencia             | 2009 | Stepped-dose versus full-dose efavirenz for HIV infection and neuropsychiatric adverse events: a randomized trial                                                                                                   |
| 86                                                                                                                                     | Sension                        | 2009 | Improvement in lipid profiles in antiretroviral-experienced HIV-positive patients with hyperlipidemia after a switch to unboosted atazanavir                                                                        |
| 87                                                                                                                                     | Mulenga                        | 2010 | Strategies for nevirapine initiation in HIV-infected children taking pediatric fixed-dose combination "baby pills" in Zambia: a randomized controlled trial                                                         |
| 88                                                                                                                                     | Murphy                         | 2010 | Antiviral activity and tolerability of amdoxovir with zidovudine in a randomized double-blind placebo-controlled study in HIV-1-infected individuals                                                                |
| 89                                                                                                                                     | Ratsela                        | 2010 | A randomized factorial trial comparing 4 treatment regimens in treatment-naïve HIV-infected persons with AIDS and/or a CD4 cell count <200 cells/μL in South Africa                                                 |
| 90                                                                                                                                     | Read                           | 2010 | The effect of leflunomide on cycling and activation of T-cells in HIV-1-infected participants                                                                                                                       |
| 91                                                                                                                                     | Lalezari                       | 2011 | Safety, efficacy, and pharmacokinetics of TBR-652, a CCR5/CCR2 antagonist, in HIV-1-infected, treatment-experienced, CCR5 antagonist-naïve subjects                                                                 |
| 92                                                                                                                                     | Lake                           | 2012 | A randomized trial of Raltegravir replacement for protease inhibitor or non-nucleoside reverse transcriptase inhibitor in HIV-infected women with lipohypertrophy                                                   |
| 93                                                                                                                                     | Carey                          | 2012 | A randomized study of pharmacokinetics, efficacy, and safety of 2 raltegravir plus atazanavir strategies in ART-treated adults                                                                                      |
| 94                                                                                                                                     | Cotte                          | 2013 | Randomized placebo-controlled study of the safety, tolerability, antiviral activity, and pharmacokinetics of 10-day monotherapy with BMS-986001, a novel HIV NRTI, in treatment-experienced HIV-1-infected subjects |

**Table S4 – List of excluded studies by exclusion reason (continuation)**

| Studies excluded for evaluating ART no longer used in clinical practice or comparing the same ARV regimen initiated at different times |                                |      |                                                                                                                                                                                                                                                                                                                          |
|----------------------------------------------------------------------------------------------------------------------------------------|--------------------------------|------|--------------------------------------------------------------------------------------------------------------------------------------------------------------------------------------------------------------------------------------------------------------------------------------------------------------------------|
| Amount                                                                                                                                 | First author or research group | Year | Title                                                                                                                                                                                                                                                                                                                    |
| 95                                                                                                                                     | Wang                           | 2013 | Effect of Immune No. 2 (2) on the immune reconstitution in patients with HIV/AIDS after highly active antiretroviral treatment: a randomized double blind placebo controlled clinical trial                                                                                                                              |
| 96                                                                                                                                     | Wilkins                        | 2013 | SPIRIT: switching to rilpivirine/emtricitabine/tenofovir DF single-tablet regimen from boosted protease inhibitor maintains HIV suppression at week 48 regardless of viral load or CD4 + count prior to initiation of ARV therapy                                                                                        |
| 97                                                                                                                                     | Vernazza                       | 2013 | Efficacy and safety of lersivirine (UK-453,061) versus efavirenz in antiretroviral treatment-naïve HIV-1-infected patients: week 48 primary analysis results from an ongoing, multicenter, randomized, double-blind, phase IIb trial                                                                                     |
| 98                                                                                                                                     | DeJesus                        | 2014 | Efficacy and safety of lersivirine versus etravirine for the treatment of HIV-1 infection in patients with prior non-nucleoside reverse transcriptase inhibitor (NNRTI) use and evidence of NNRTI resistance: a randomized phase 2B trial                                                                                |
| 99                                                                                                                                     | Stellbrink                     | 2014 | Antiviral activity, pharmacokinetics, and safety of the HIV-1 protease inhibitor TMC310911, coadministered with ritonavir, in treatment-naïve HIV-1-infected patients                                                                                                                                                    |
| 100                                                                                                                                    | Harrison                       | 2015 | HIV-1 Drug Resistance and Second-Line Treatment in Children Randomized to Switch at Low Versus Higher RNA Thresholds                                                                                                                                                                                                     |
| 101                                                                                                                                    | Krystal                        | 2015 | BMS-955176: Antiviral activity/safety of a 2nd-generation HIV-1 maturation inhibitor                                                                                                                                                                                                                                     |
| 102                                                                                                                                    | Gupta                          | 2016 | Efficacy, safety, bone and metabolic effects of HIV nucleoside reverse transcriptase inhibitor BMS-986001 (AI467003): a phase 2b randomised, controlled, partly blinded trial                                                                                                                                            |
| 103                                                                                                                                    | Thompson                       | 2016 | A 48-week randomized phase 2b study evaluating cenicriviroc versus efavirenz in treatment-naïve HIV-infected adults with C-C chemokine receptor type 5-tropic virus                                                                                                                                                      |
| 104                                                                                                                                    | Zhang                          | 2016 | Combination of long-acting HIV fusion inhibitor albuviride and LPV/r showed potent efficacy in HIV-1 patients                                                                                                                                                                                                            |
| 105                                                                                                                                    | Lake                           | 2016 | STRIIVING: switching to abacavir/dolutegravir/lamivudine fixed dose combination (ABC/DTG/3TC FDC) from a PI, INI or NNRTI based regimen maintains HIV suppression at week 48                                                                                                                                             |
| 106                                                                                                                                    | Gallant                        | 2017 | Antiviral Activity, Safety, and Pharmacokinetics of Bictegravir as 10-Day Monotherapy in HIV-1-Infected Adults                                                                                                                                                                                                           |
| 107                                                                                                                                    | Hwang                          | 2017 | Antiviral Activity, Safety, and Exposure-Response Relationships of GSK3532795, a Second-Generation Human Immunodeficiency Virus Type 1 Maturation Inhibitor, Administered as Monotherapy or in Combination With Atazanavir With or Without Ritonavir in a Phase 2a Randomized, Dose-Ranging, Controlled Trial (AI468002) |
| 108                                                                                                                                    | Sax                            | 2017 | A randomized trial of bictegravir or dolutegravir with emtricitabine and tenofovir alafenamide (F/TAF) followed by open label switch to bictegravir/F/ TAF fixed dose combination                                                                                                                                        |
| 109                                                                                                                                    | Sax                            | 2017 | Randomised trial of bictegravir or dolutegravir with FTC/TAF for initial HIV therapy                                                                                                                                                                                                                                     |
| 110                                                                                                                                    | Sax                            | 2017 | Coformulated bictegravir, emtricitabine, and tenofovir alafenamide versus dolutegravir with emtricitabine and tenofovir alafenamide, for initial treatment of HIV-1 infection (GS-US-380–1490): a randomised, double-blind, multicentre, phase 3, non-inferiority trial                                                  |
| 111                                                                                                                                    | Wijting                        | 2017 | Dolutegravir as maintenance monotherapy for HIV (DOMONO): a phase 2, randomised non-inferiority trial                                                                                                                                                                                                                    |

**Table S4 – List of excluded studies by exclusion reason (continuation)**

| Studies excluded for evaluating ART no longer used in clinical practice or comparing the same ARV regimen initiated at different times |                                |      |                                                                                                                                                                                                                                                                              |
|----------------------------------------------------------------------------------------------------------------------------------------|--------------------------------|------|------------------------------------------------------------------------------------------------------------------------------------------------------------------------------------------------------------------------------------------------------------------------------|
| Amount                                                                                                                                 | First author or research group | Year | Title                                                                                                                                                                                                                                                                        |
| 112                                                                                                                                    | Sax                            | 2018 | Coformulated bicitegravir, emtricitabine, tenofovir alafenamide after initial treatment with bicitegravir or dolutegravir and emtricitabine/tenofovir alafenamide                                                                                                            |
| 113                                                                                                                                    | Stellbrink                     | 2018 | Phase III randomized, controlled clinical trial of bicitegravir coformulated with FTC/TAF in a fixed-dose combination (B/F/TAF) versus dolutegravir (DTG) + F/TAF in treatment-naïve HIV-1 positive adults: week 96                                                          |
| 114                                                                                                                                    | Wohl                           | 2018 | A phase 3, randomized, controlled clinical trial of bicitegravir in a fixed-dose combination, B/F/TAF, vs. ABC/DTG/3TC in treatment-naïve adults at week 96                                                                                                                  |
| 115                                                                                                                                    | Mora-Peris                     | 2018 | Changes in cerebral function parameters with maraviroc-intensified antiretroviral therapy in treatment naïve HIV-positive individuals                                                                                                                                        |
| 116                                                                                                                                    | Gatell                         | 2019 | Immediate Versus Deferred Switching From a Boosted Protease Inhibitor-based Regimen to a Dolutegravir-based Regimen in Virologically Suppressed Patients With High Cardiovascular Risk or Age $\geq 50$ Years: Final 96-Week Results of the NEAT022 Study                    |
| 117                                                                                                                                    | Rutsaert                       | 2019 | Safety, tolerability and impact on viral reservoirs of the addition to antiretroviral therapy of ABX464, an investigational antiviral drug, in individuals living with HIV-1: a Phase IIa randomised controlled study                                                        |
| 118                                                                                                                                    | Sax                            | 2019 | Switching to a single-tablet regimen bicitegravir, emtricitabine, and tenofovir alafenamide (B/F/TAF) from dolutegravir (DTG) plus emtricitabine and either tenofovir alafenamide or tenofovir disoproxil fumarate (F/TAF or F/TDF)                                          |
| 119                                                                                                                                    | Stellbrink                     | 2019 | Co-formulated bicitegravir, emtricitabine, and tenofovir alafenamide versus dolutegravir with emtricitabine and tenofovir alafenamide for initial treatment of HIV-1 infection: week 96 results from a randomised, double-blind, multicentre, phase 3, non-inferiority trial |
| 120                                                                                                                                    | Wijting                        | 2019 | Changes in renal, bone, lipid, and inflammation markers in HIV-1 patients after combination antiretroviral therapy simplification to dolutegravir monotherapy                                                                                                                |
| 121                                                                                                                                    | Wohl                           | 2019 | Bicitegravir combined with emtricitabine and tenofovir alafenamide versus dolutegravir, abacavir, and lamivudine for initial treatment of HIV-1 infection: week 96 results from a randomised, double-blind, multicentre, phase 3, non-inferiority trial                      |
| 122                                                                                                                                    | Kityo                          | 2019 | Longer-term (96-week) efficacy and safety of switching to bicitegravir/emtricitabine/tenofovir alafenamide (B/F/TAF) in women                                                                                                                                                |
| 123                                                                                                                                    | Sax                            | 2020 | Switching to bicitegravir, emtricitabine, and tenofovir alafenamide in virologically suppressed adults with HIV                                                                                                                                                              |
| 124                                                                                                                                    | Su                             | 2020 | Efficacy and safety of the long-acting fusion inhibitor albuvirtide in antiretroviral-experienced adults with human immunodeficiency virus-1: interim analysis of the randomized, controlled, phase 3, non-inferiority TALENT study                                          |
| 125                                                                                                                                    | Kumar                          | 2020 | Long-term treatment efficacy and safety following switch to doravirine/lamivudine/tenofovir disoproxil fumarate (DOR/3TC/TDF): week 144 results of the DRIVE-SHIFT trial                                                                                                     |
| 126                                                                                                                                    | Luscombe                       | 2020 | Human immunodeficiency virus type-1 Vpu inhibitor, BIT225, in combination with 3-drug antiretroviral therapy modulates inflammation and immune cells functions                                                                                                               |
| 127                                                                                                                                    | Lama                           | 2021 | Clinical and Immunologic Outcomes After Immediate or Deferred Antiretroviral Therapy Initiation During Primary Human Immunodeficiency Virus Infection: The Sabes Randomized Clinical Study                                                                                   |

**Table S4 – List of excluded studies by exclusion reason (continuation)**

| Studies excluded for evaluating ART no longer used in clinical practice or comparing the same ARV regimen initiated at different times |                                                     |      |                                                                                                                                                                                                                                                           |
|----------------------------------------------------------------------------------------------------------------------------------------|-----------------------------------------------------|------|-----------------------------------------------------------------------------------------------------------------------------------------------------------------------------------------------------------------------------------------------------------|
| Amount                                                                                                                                 | First author or research group                      | Year | Title                                                                                                                                                                                                                                                     |
| 128                                                                                                                                    | Nelson                                              | 2021 | Efficacy, safety and central nervous system effects after switch from efavirenz/tenofovir/emtricitabine to doravirine/tenofovir/lamivudine                                                                                                                |
| Studies excluded for evaluating ART at doses no longer used in clinical practice                                                       |                                                     |      |                                                                                                                                                                                                                                                           |
| Amount                                                                                                                                 | First author or research group                      | Year | Title                                                                                                                                                                                                                                                     |
| 1                                                                                                                                      | Fischl                                              | 1989 | Prolonged zidovudine therapy in patients with AIDS and advanced AIDS-related complex                                                                                                                                                                      |
| 2                                                                                                                                      | Fischl                                              | 1990 | A randomized controlled trial of a reduced daily dose of zidovudine in patients with the acquired immunodeficiency syndrome.                                                                                                                              |
| 3                                                                                                                                      | Fischl                                              | 1990 | The safety and efficacy of zidovudine (AZT) in the treatment of subjects with mildly symptomatic human immunodeficiency virus type 1 (HIV) infection. A double-blind, placebo-controlled trial. The AIDS Clinical Trials Group                            |
| 4                                                                                                                                      | Volberding                                          | 1990 | Zidovudine in asymptomatic human immunodeficiency virus infection. A controlled trial in persons with fewer than 500 CD4-positive cells per cubic millimeter. The AIDS Clinical Trials Group of the National Institute of Allergy and Infectious Diseases |
| 5                                                                                                                                      | Merigan                                             | 1991 | Placebo-controlled trial to evaluate zidovudine in treatment of human immunodeficiency virus infection in asymptomatic patients with hemophilia. NHF-ACTG 036 Study Group                                                                                 |
| 6                                                                                                                                      | Kimura                                              | 1992 | A randomized trial of reduced doses of azidothymidine in Japanese patients with human immunodeficiency virus type 1 infection                                                                                                                             |
| 7                                                                                                                                      | Nordic Medical Research Councils' HIV Therapy Group | 1992 | Double blind dose-response study of zidovudine in AIDS and advanced HIV infection. Nordic Medical Research Councils' HIV Therapy Group                                                                                                                    |
| 8                                                                                                                                      | Gelber                                              | 1992 | Quality-of-life evaluation in a clinical trial of zidovudine therapy in patients with mildly symptomatic HIV infection. The AIDS Clinical Trials Group                                                                                                    |
| 9                                                                                                                                      | Davey                                               | 1993 | Plasma viremia as a sensitive indicator of the antiretroviral activity of L-697,661                                                                                                                                                                       |
| 10                                                                                                                                     | Cooper                                              | 1993 | Zidovudine in persons with asymptomatic HIV infection and CD4+ cell counts greater than 400 per cubic millimeter. The European-Australian Collaborative Group                                                                                             |
| 11                                                                                                                                     | Wu                                                  | 1993 | Functional status and well-being in a placebo-controlled trial of zidovudine in early symptomatic HIV infection                                                                                                                                           |
| 12                                                                                                                                     | Mannucci                                            | 1994 | Randomized double-blind, placebo-controlled trial of twice-daily zidovudine in asymptomatic haemophiliacs infected with the human immunodeficiency virus type 1. European-Australian Haemophilia Collaborative Study Group                                |
| 13                                                                                                                                     | Yarchoan                                            | 1994 | A randomized pilot study of alternating or simultaneous zidovudine and didanosine therapy in patients with symptomatic human immunodeficiency virus infection                                                                                             |
| 14                                                                                                                                     | Lenderking                                          | 1994 | Evaluation of the quality of life associated with zidovudine treatment in asymptomatic human immunodeficiency virus infection. The AIDS Clinical Trials Group                                                                                             |
| 15                                                                                                                                     | Husson                                              | 1994 | Zidovudine and didanosine combination therapy in children with human immunodeficiency virus infection                                                                                                                                                     |
| 16                                                                                                                                     | Eron                                                | 1995 | Treatment with lamivudine, zidovudine, or both in HIV-positive patients with 200 to 500 CD4+ cells per cubic millimeter. North American HIV Working Party                                                                                                 |
| 17                                                                                                                                     | Kitchen                                             | 1995 | Safety and activity of saquinavir in HIV infection                                                                                                                                                                                                        |

**Table S4 – List of excluded studies by exclusion reason (continuation)**

| Studies excluded for evaluating ART at doses no longer used in clinical practice |                                |      |                                                                                                                                                                                                                                  |
|----------------------------------------------------------------------------------|--------------------------------|------|----------------------------------------------------------------------------------------------------------------------------------------------------------------------------------------------------------------------------------|
| Amount                                                                           | First author or research group | Year | Title                                                                                                                                                                                                                            |
| 18                                                                               | Darbyshire                     | 1996 | Delta: A randomised double-blind controlled trial comparing combinations of zidovudine plus didanosine or zalcitabine with zidovudine alone in HIV-infected individuals                                                          |
| 19                                                                               | Brady                          | 1996 | Randomized study of the tolerance and efficacy of high- versus low-dose zidovudine in human immunodeficiency virus-infected children with mild to moderate symptoms (AIDS Clinical Trials group 128)                             |
| 20                                                                               | Staszewski                     | 1996 | Safety and efficacy of lamivudine-zidovudine combination therapy in zidovudine-experienced patients. A randomized controlled comparison with zidovudine monotherapy. Lamivudine European HIV Working Group                       |
| 21                                                                               | Englund                        | 1997 | Zidovudine, didanosine, or both as the initial treatment for symptomatic HIV-infected children. AIDS Clinical Trials Group (ACTG) Study 152 Team                                                                                 |
| 22                                                                               | Gulick                         | 1997 | Treatment with indinavir, zidovudine, and lamivudine in adults with human immunodeficiency virus infection and prior antiretroviral therapy                                                                                      |
| 23                                                                               | Hammer                         | 1997 | A controlled trial of two nucleoside analogues plus indinavir in persons with human immunodeficiency virus infection and CD4 cell counts of 200 per cubic millimeter or less. AIDS Clinical Trials Group 320 Study Team          |
| 24                                                                               | Simpson                        | 1997 | Analysis of myopathy in a placebo-controlled zidovudine trial                                                                                                                                                                    |
| 25                                                                               | Shepp                          | 1997 | A comparative trial of zidovudine administered every four versus every twelve hours for the treatment of advanced HIV disease                                                                                                    |
| 26                                                                               | Gulick                         | 1998 | Simultaneous vs sequential initiation of therapy with indinavir, zidovudine, and lamivudine for HIV-1 infection: 100-week follow-up                                                                                              |
| 27                                                                               | Cameron                        | 1998 | Randomised placebo-controlled trial of ritonavir in advanced HIV-1 disease. The Advanced HIV Disease Ritonavir Study Group                                                                                                       |
| 28                                                                               | Foudraine                      | 1998 | Improvement of chronic diarrhoea in patients with advanced HIV-1 infection during potent antiretroviral therapy                                                                                                                  |
| 29                                                                               | Mitsuyasu                      | 1998 | Activity of the soft gelatin formulation of saquinavir in combination therapy in antiretroviral-naive patients. NV15355 Study Team                                                                                               |
| 30                                                                               | Kline                          | 1998 | A randomized comparative trial of stavudine (d4T) versus zidovudine (ZDV, AZT) in children with human immunodeficiency virus infection. AIDS Clinical Trials Group 240 Team                                                      |
| 31                                                                               | Markowitz                      | 1998 | A preliminary evaluation of nelfinavir mesylate, an inhibitor of human immunodeficiency virus (HIV)-1 protease, to treat HIV infection                                                                                           |
| 32                                                                               | Niu                            | 1998 | Zidovudine treatment in patients with primary (acute) human immunodeficiency virus type 1 infection: a randomized, double-blind, placebo-controlled trial. DATRI 002 Study Group. Division of AIDS Treatment Research Initiative |
| 33                                                                               | Gibb                           | 1998 | A randomized double-blind trial of the addition of lamivudine or matching placebo to current nucleoside analogue reverse transcriptase inhibitor therapy in HIV-infected children: The PENTA-4 trial                             |
| 34                                                                               | Hirsch                         | 1999 | A randomized, controlled trial of indinavir, zidovudine, and lamivudine in adults with advanced human immunodeficiency virus type 1 infection and prior antiretroviral therapy                                                   |
| 35                                                                               | Staszewski                     | 1999 | Efavirenz plus zidovudine and lamivudine, efavirenz plus indinavir, and indinavir plus zidovudine and lamivudine in the treatment of HIV-1 infection in adults. Study 006 Team                                                   |
| 36                                                                               | Kumar                          | 1999 | Safety and pharmacokinetics of abacavir (1592U89) following oral administration of escalating single doses in human immunodeficiency virus type 1-infected adults                                                                |

**Table S4 – List of excluded studies by exclusion reason (continuation)**

| Studies excluded for evaluating ART at doses no longer used in clinical practice |                                |      |                                                                                                                                                                                                                                         |
|----------------------------------------------------------------------------------|--------------------------------|------|-----------------------------------------------------------------------------------------------------------------------------------------------------------------------------------------------------------------------------------------|
| Amount                                                                           | First author or research group | Year | Title                                                                                                                                                                                                                                   |
| 37                                                                               | Stuart                         | 1999 | Randomized trial comparing saquinavir soft gelatin capsules versus indinavir as part of triple therapy (CHEESE study)                                                                                                                   |
| 38                                                                               | Gisolf                         | 2000 | The effect of treatment intensification in HIV-infection: a study comparing treatment with ritonavir/saquinavir and ritonavir/saquinavir/stavudine. Prometheus Study Group                                                              |
| 39                                                                               | Lewi                           | 2000 | Randomized, double-blind trial comparing indinavir alone, zidovudine alone and indinavir plus zidovudine in antiretroviral therapy-naive HIV-infected individuals with CD4 cell counts between 50 and 250/mm <sup>3</sup>               |
| 40                                                                               | Phanuphak                      | 2000 | A comparison of two dosing regimens of zidovudine in Thai adults with early symptomatic HIV infection. Conducting clinical HIV trials in South-East Asia                                                                                |
| 41                                                                               | AVANTI                         | 2000 | AVANTI 2. Randomized, double-blind trial to evaluate the efficacy and safety of zidovudine plus lamivudine versus zidovudine plus lamivudine plus indinavir in HIV-infected antiretroviral-naive patients                               |
| 42                                                                               | Murphy                         | 2001 | ABT-378/ritonavir plus stavudine and lamivudine for the treatment of antiretroviral-naive adults with HIV-1 infection: 48-week results                                                                                                  |
| 43                                                                               | Rozenbaum                      | 2001 | Treatment intensification with abacavir in HIV-infected patients with at least 12 weeks previous lamivudine/zidovudine treatment                                                                                                        |
| 44                                                                               | Benson                         | 2002 | Safety and antiviral activity at 48 weeks of lopinavir/ritonavir plus nevirapine and 2 nucleoside reverse-transcriptase inhibitors in human immunodeficiency virus type 1-infected protease inhibitor-experienced patients              |
| 45                                                                               | French                         | 2002 | Randomized, open-label, comparative trial to evaluate the efficacy and safety of three antiretroviral drug combinations including two nucleoside analogues and nevirapine for previously untreated HIV-1 Infection: the OzCombo 2 study |
| 46                                                                               | Núñez                          | 2002 | SENC (Spanish efavirenz vs. nevirapine comparison) trial: a randomized, open-label study in HIV-infected naive individuals                                                                                                              |
| 47                                                                               | Lichterfeld                    | 2002 | Long-term efficacy and safety of ritonavir/indinavir at 400/400 mg twice a day in combination with two nucleoside reverse transcriptase inhibitors as first line antiretroviral therapy                                                 |
| 48                                                                               | Gerstoft                       | 2003 | Low efficacy and high frequency of adverse events in a randomized trial of the triple nucleoside regimen abacavir, stavudine and didanosine                                                                                             |
| 49                                                                               | Haas                           | 2003 | Therapy with atazanavir plus saquinavir in patients failing highly active antiretroviral therapy: a randomized comparative pilot trial                                                                                                  |
| 50                                                                               | Murphy                         | 2003 | Dose-ranging, randomized, clinical trial of atazanavir with lamivudine and stavudine in antiretroviral-naive subjects: 48-week results                                                                                                  |
| 51                                                                               | van Leeuwen                    | 2003 | A randomized trial to study first-line combination therapy with or without a protease inhibitor in HIV-1-infected patients                                                                                                              |
| 52                                                                               | Martinez-Picado                | 2003 | Alternation of antiretroviral drug regimens for HIV infection. A randomized, controlled trial                                                                                                                                           |
| 53                                                                               | Kirk                           | 2003 | A randomized trial comparing initial HAART regimens of nelfinavir/nevirapine and ritonavir/saquinavir in combination with two nucleoside reverse transcriptase inhibitors                                                               |
| 54                                                                               | Lalezari                       | 2003 | A controlled Phase II trial assessing three doses of enfuvirtide (T-20) in combination with abacavir, amprenavir, ritonavir and efavirenz in non-nucleoside reverse transcriptase inhibitor-naive HIV-infected adults                   |
| 55                                                                               | Maggiolo                       | 2003 | Once-a-day therapy for HIV infection: a controlled, randomized study in antiretroviral-naive HIV-1-infected patients                                                                                                                    |
| 56                                                                               | Rousseau                       | 2003 | Prospective randomized trial of emtricitabine versus lamivudine short-term monotherapy in human immunodeficiency virus-infected patients                                                                                                |

**Table S4 – List of excluded studies by exclusion reason (continuation)**

| Studies excluded for evaluating ART at doses no longer used in clinical practice |                                |      |                                                                                                                                                                                                                                         |
|----------------------------------------------------------------------------------|--------------------------------|------|-----------------------------------------------------------------------------------------------------------------------------------------------------------------------------------------------------------------------------------------|
| Amount                                                                           | First author or research group | Year | Title                                                                                                                                                                                                                                   |
| 57                                                                               | Negredo                        | 2004 | Alternation of antiretroviral drug regimens for HIV infection. Efficacy, safety and tolerability at week 96 of the Swatch Study                                                                                                         |
| 58                                                                               | Ruane                          | 2004 | Pharmacodynamic effects of zidovudine 600 mg once/day versus 300 mg twice/day in therapy-naïve patients infected with human immunodeficiency virus                                                                                      |
| 59                                                                               | van Leth                       | 2004 | Comparison of first-line antiretroviral therapy with regimens including nevirapine, efavirenz, or both drugs, plus stavudine and lamivudine: a randomised open-label trial, the 2NN Study                                               |
| 60                                                                               | Rhame                          | 2004 | Pharmacokinetics of indinavir and ritonavir administered at 667 and 100 milligrams, respectively, every 12 hours compared with indinavir administered at 800 milligrams every 8 hours in human immunodeficiency virus-infected patients |
| 61                                                                               | Caso                           | 2005 | A randomized controlled trial investigating the efficacy and safety of switching from a protease inhibitor to nevirapine in patients with undetectable viral load                                                                       |
| 62                                                                               | Arastéh                        | 2005 | TMC114/ritonavir substitution for protease inhibitor(s) in a non-suppressive antiretroviral regimen: a 14-day proof-of-principle trial                                                                                                  |
| 63                                                                               | Maitland                       | 2005 | Early virologic failure in HIV-1 infected subjects on didanosine/tenofovir/efavirenz: 12-week results from a randomized trial                                                                                                           |
| 64                                                                               | Barrios                        | 2005 | Simplification therapy with once-daily didanosine, tenofovir and efavirenz in HIV-1-infected adults with viral suppression receiving a more complex antiretroviral regimen: final results of the EFADITE trial                          |
| 65                                                                               | Lowe                           | 2005 | Comparison of two once-daily regimens with a regimen consisting of nelfinavir, didanosine, and stavudine in antiretroviral therapy-naïve adults: 48-week results from the Antiretroviral Regimen Evaluation Study (ARES)                |
| 66                                                                               | Sosa                           | 2005 | Abacavir and lamivudine fixed-dose combination tablet once daily compared with abacavir and lamivudine twice daily in HIV-infected patients over 48 weeks (ESS30008, SEAL)                                                              |
| 67                                                                               | Portsmouth                     | 2005 | Better maintained adherence on switching from twice-daily to once-daily therapy for HIV: a 24-week randomized trial of treatment simplification using stavudine prolonged-release capsules                                              |
| 68                                                                               | Montaner                       | 2006 | Efficacy, safety and pharmacokinetics of once-daily saquinavir soft-gelatin capsule/ritonavir in antiretroviral-naïve, HIV-infected patients                                                                                            |
| 69                                                                               | Ruane                          | 2006 | Pilot study of once-daily simplification therapy with abacavir/lamivudine/zidovudine and efavirenz for treatment of HIV-1 infection                                                                                                     |
| 70                                                                               | DeJesus                        | 2006 | Antiviral activity, pharmacokinetics, and dose response of the HIV-1 integrase inhibitor GS-9137 (JTK-303) in treatment-naïve and treatment-experienced patients                                                                        |
| 71                                                                               | Gathe                          | 2007 | Efficacy and Safety of Three Doses of Tipranavir Boosted with Ritonavir in Treatment-Experienced HIV Type 1-Infected Patients                                                                                                           |
| 72                                                                               | Brew                           | 2007 | Factor in AIDS dementia complex trial design: results and lessons from the abacavir trial                                                                                                                                               |
| 73                                                                               | Fischl                         | 2007 | Randomized open-label trial of two simplified, class-sparing regimens following a first suppressive three or four-drug regimen                                                                                                          |
| 74                                                                               | Nadler                         | 2007 | Efficacy and safety of etravirine (TMC125) in patients with highly resistant HIV-1: primary 24-week analysis                                                                                                                            |
| 75                                                                               | Podzamczer                     | 2007 | High-dose lopinavir/ritonavir in highly treatment-experienced HIV-1 patients: efficacy, safety, and predictors of response                                                                                                              |
| 76                                                                               | Markowitz                      | 2007 | Long-term efficacy and safety of tipranavir boosted with ritonavir in HIV-1-infected patients failing multiple protease inhibitor regimens: 80-week data from a phase 2 study                                                           |

**Table S4 – List of excluded studies by exclusion reason (continuation)**

| Studies excluded for evaluating ART at doses no longer used in clinical practice |                                |      |                                                                                                                                                                                                                                                 |
|----------------------------------------------------------------------------------|--------------------------------|------|-------------------------------------------------------------------------------------------------------------------------------------------------------------------------------------------------------------------------------------------------|
| Amount                                                                           | First author or research group | Year | Title                                                                                                                                                                                                                                           |
| 77                                                                               | Demeter                        | 2008 | Association of efavirenz hypersusceptibility with virologic response in ACTG 368, a randomized trial of abacavir (ABC) in combination with efavirenz (EFV) and indinavir (IDV) in HIV-infected subjects with prior nucleoside analog experience |
| 78                                                                               | Berenguer                      | 2008 | Didanosine, lamivudine, and efavirenz versus zidovudine, lamivudine, and efavirenz for the initial treatment of HIV type 1 infection: final analysis (48 weeks) of a prospective, randomized, noninferiority clinical trial, GESIDA 3903        |
| 79                                                                               | Cohen                          | 2008 | Short-term safety and tolerability of a once-daily fixed-dose abacavir-lamivudine combination versus twice-daily dosing of abacavir and lamivudine as separate components: findings from the ALOHA study                                        |
| 80                                                                               | Salazar                        | 2008 | Efficacy, safety and tolerability of tipranavir coadministered with ritonavir in HIV-1-infected children and adolescents                                                                                                                        |
| 81                                                                               | Montaner                       | 2008 | Safety, tolerability, and preliminary efficacy of 48 weeks of etravirine therapy in a phase IIb dose-ranging study involving treatment-experienced patients with HIV-1 infection                                                                |
| 82                                                                               | Blümer                         | 2008 | Zidovudine/lamivudine contributes to insulin resistance within 3 months of starting combination antiretroviral therapy                                                                                                                          |
| 83                                                                               | Wright                         | 2008 | Efficacy and safety of 48 weeks of enfuvirtide 180 mg once-daily dosing versus 90 mg twice-daily dosing in HIV-infected patients                                                                                                                |
| 84                                                                               | Tebas                          | 2009 | Peripheral and visceral fat changes following a treatment switch to a non-thymidine analogue or a nucleoside-sparing regimen in HIV-infected subjects with peripheral lipoatrophy: results of ACTG A5110                                        |
| 85                                                                               | van Vonderen                   | 2009 | Zidovudine/lamivudine for HIV-1 infection contributes to limb fat loss                                                                                                                                                                          |
| 86                                                                               | Landman                        | 2009 | Efficacy and safety of ritonavir-boosted dual protease inhibitor therapy in antiretroviral-naïve HIV-1-infected patients: the 2IP ANRS 127 study                                                                                                |
| 87                                                                               | Molina                         | 2009 | Fosamprenavir/ritonavir in advanced HIV disease (TRIAD): a randomized study of high-dose, dual-boosted or standard dose fosamprenavir/ritonavir in HIV-1-infected patients with antiretroviral resistance                                       |
| 88                                                                               | van Vonderen                   | 2009 | First line zidovudine/lamivudine/lopinavir/ritonavir leads to greater bone loss compared to nevirapine/lopinavir/ritonavir                                                                                                                      |
| 89                                                                               | Moltó                          | 2010 | Treatment simplification to once daily darunavir/ritonavir guided by the darunavir inhibitory quotient in heavily pretreated HIV-infected patients                                                                                              |
| 90                                                                               | Goebel                         | 2010 | Pharmacokinetic characterization of three doses of tipranavir boosted with ritonavir on highly active antiretroviral therapy in treatment-experienced HIV-1 patients                                                                            |
| 91                                                                               | Morello                        | 2010 | The benefit of simplification from tipranavir/ritonavir 500/200 bid to 500/100 bid guided by therapeutic drug monitoring                                                                                                                        |
| 92                                                                               | Eron                           | 2011 | Raltegravir once daily or twice daily in previously untreated patients with HIV-1: a randomised, active-controlled, phase 3 non-inferiority trial                                                                                               |
| 93                                                                               | Gazzard                        | 2011 | Phase 2 double-blind, randomized trial of etravirine versus efavirenz in treatment-naïve patients: 48-week results                                                                                                                              |
| 94                                                                               | Nelson                         | 2011 | A comparison of neuropsychiatric adverse events during 12 weeks of treatment with etravirine and efavirenz in a treatment-naïve, HIV-1-infected population                                                                                      |
| 95                                                                               | Fätkenheuer                    | 2012 | Lipid profiles for etravirine versus efavirenz in treatment-naïve patients in the randomized, double-blind SENSE trial                                                                                                                          |
| 96                                                                               | van Lunzen                     | 2012 | Once daily dolutegravir (S/GSK1349572) in combination therapy in antiretroviral-naïve adults with HIV: planned interim 48 week results from SPRING-1, a dose-ranging, randomised, phase 2b trial                                                |



**Table S4 – List of excluded studies by exclusion reason (continuation)**

| Studies excluded for evaluating ART at doses no longer used in clinical practice |                                |      |                                                                                                                                                                                                                                                                        |
|----------------------------------------------------------------------------------|--------------------------------|------|------------------------------------------------------------------------------------------------------------------------------------------------------------------------------------------------------------------------------------------------------------------------|
| Amount                                                                           | First author or research group | Year | Title                                                                                                                                                                                                                                                                  |
| 97                                                                               | Behrens                        | 2012 | Switching to tenofovir/emtricitabine from abacavir/lamivudine in HIV-infected adults with raised cholesterol: effect on lipid profiles                                                                                                                                 |
| 98                                                                               | Nettles                        | 2012 | Pharmacodynamics, safety, and pharmacokinetics of BMS-663068, an oral HIV-1 attachment inhibitor in HIV-1-infected subjects                                                                                                                                            |
| 99                                                                               | Di Perri                       | 2013 | Pharmacokinetics and pharmacodynamics of etravirine 400 mg once daily in treatment-naïve patients                                                                                                                                                                      |
| 100                                                                              | Bertz                          | 2013 | Pharmacokinetics and pharmacodynamics of atazanavir-containing antiretroviral regimens, with or without ritonavir, in patients who are HIV-positive and treatment-naïve                                                                                                |
| 101                                                                              | Stellbrink                     | 2013 | Dolutegravir in antiretroviral-naïve adults with HIV-1: 96-week results from a randomized dose-ranging study                                                                                                                                                           |
| 102                                                                              | Mills                          | 2013 | Maraviroc once-daily nucleoside analog-sparing regimen in treatment-naïve patients: randomized, open-label pilot study                                                                                                                                                 |
| 103                                                                              | Lalezari                       | 2014 | Attachment Inhibitor Prodrug BMS-663068 in ARV-Experienced Subjects: week 24 Analysis                                                                                                                                                                                  |
| 104                                                                              | Lalezari                       | 2014 | Safety profile of HIV-1 attachment inhibitor prodrug BMS-663068 in antiretroviral-experienced subjects: week 24 analysis                                                                                                                                               |
| 105                                                                              | Carey                          | 2015 | Efficacy and safety of efavirenz 400 mg daily versus 600 mg daily: 96-week data from the randomised, double-blind, placebo-controlled, non-inferiority ENCORE1 study                                                                                                   |
| 106                                                                              | Moltó                          | 2015 | Reduced darunavir dose is as effective in maintaining HIV suppression as the standard dose in virologically suppressed HIV-infected patients: a randomized clinical trial                                                                                              |
| 107                                                                              | Nozza                          | 2015 | Maraviroc 150mg daily plus lopinavir/ritonavir, a nucleoside/nucleotide reverse transcriptase inhibitor-sparing regimen for HIV-infected naive patients: 48-week final results of VEMAN study                                                                          |
| 108                                                                              | Orrell                         | 2015 | Pharmacokinetics of Etravirine Combined with Atazanavir/Ritonavir and a Nucleoside Reverse Transcriptase Inhibitor in Antiretroviral Treatment-Experienced, HIV-1-Infected Patients                                                                                    |
| 109                                                                              | Schürmann                      | 2016 | A randomized, double-blind, placebo-controlled, short-term monotherapy study of doravirine in treatment-naïve HIV-infected individuals                                                                                                                                 |
| 110                                                                              | Butler                         | 2016 | BREATHER (PENTA 16) short-cycle therapy (SCT) (5 days on/2 days off) in young people with chronic human immunodeficiency virus infection: an open, randomised, parallel-group Phase II/III trial                                                                       |
| 111                                                                              | Margolis                       | 2016 | Cabotegravir+rilpivirine as long-acting maintenance therapy: IATTE-2 week 48 results                                                                                                                                                                                   |
| 112                                                                              | Thompson                       | 2017 | Safety and efficacy of the HIV-1 attachment inhibitor prodrug fostemsavir in antiretroviral-experienced subjects: week 48 analysis of AI438011, a Phase IIb, randomized controlled trial                                                                               |
| 113                                                                              | Rossetti                       | 2017 | Switch to maraviroc with darunavir/r, both QD, in patients with suppressed HIV-1 was well tolerated but virologically inferior to standard antiretroviral therapy: 48-week results of a randomized trial                                                               |
| 114                                                                              | Venter                         | 2018 | Non-inferior efficacy for darunavir/ritonavir 400/100 mg once daily versus lopinavir/ritonavir, for patients with HIV RNA below 50 copies/mL in South Africa: the 48-week WRHI 052 study                                                                               |
| 115                                                                              | Morón-López                    | 2019 | Switching From a Protease Inhibitor-based Regimen to a Dolutegravir-based Regimen: A Randomized Clinical Trial to Determine the Effect on Peripheral Blood and Ileum Biopsies From Antiretroviral Therapy-suppressed Human Immunodeficiency Virus-infected Individuals |
| 116                                                                              | Chen                           | 2020 | Efficacy and safety of lower dose tenofovir disoproxil fumarate and efavirenz versus standard dose in HIV-infected, antiretroviral-naïve adults: a multicentre, randomized, noninferiority trial                                                                       |

**Table S4 – List of excluded studies by exclusion reason (continuation)**

| Studies excluded for evaluating ART at doses no longer used in clinical practice |                                |      |                                                                                                                                                                                                                                                       |
|----------------------------------------------------------------------------------|--------------------------------|------|-------------------------------------------------------------------------------------------------------------------------------------------------------------------------------------------------------------------------------------------------------|
| Amount                                                                           | First author or research group | Year | Title                                                                                                                                                                                                                                                 |
| 117                                                                              | Chen                           | 2020 | Pharmacogenomics and pharmacokinetics of efavirenz 400 or 600 mg in 184 treatment-naive HIV-infected patients in China                                                                                                                                |
| 118                                                                              | Quercia                        | 2020 | ATLAS-2M subanalysis based on prior injection exposure: efficacy, ISRs, and preference of cabotegravir + rilpivirine every 2 months                                                                                                                   |
| 119                                                                              | Overton                        | 2021 | Long-acting cabotegravir and rilpivirine dosed every 2 months in adults with HIV-1 infection (ATLAS-2M), 48-week results: a randomised, multicentre, open-label, phase 3b, non-inferiority study                                                      |
| Studies excluded for not describing adverse events of interest for this review   |                                |      |                                                                                                                                                                                                                                                       |
| Amount                                                                           | First author or research group | Year | Title                                                                                                                                                                                                                                                 |
| 1                                                                                | Schmitt                        | 1988 | Neuropsychological outcome of zidovudine (AZT) treatment of patients with AIDS and AIDS-related complex                                                                                                                                               |
| 2                                                                                | Parks                          | 1988 | HIV-1 inhibition by azidothymidine in a concurrently randomized placebo-controlled trial                                                                                                                                                              |
| 3                                                                                | Bass                           | 1992 | The effect of zidovudine treatment on serum neopterin and beta 2-microglobulin levels in mildly symptomatic, HIV type 1 seropositive individuals                                                                                                      |
| 4                                                                                | Danner                         | 1995 | A short-term study of the safety, pharmacokinetics, and efficacy of ritonavir, an inhibitor of HIV-1 protease. European-Australian Collaborative Ritonavir Study Group                                                                                |
| 5                                                                                | Perrella                       | 1996 | Combined therapy with zidovudine, recombinant granulocyte colony stimulating factors and erythropoietin in asymptomatic HIV patients                                                                                                                  |
| 6                                                                                | Schapiro                       | 1996 | The effect of high-dose saquinavir on viral load and CD4+ T-cell counts in HIV-infected patients                                                                                                                                                      |
| 7                                                                                | Brouwers                       | 1997 | Effect of combination therapy with zidovudine and didanosine on neuropsychological functioning in patients with symptomatic HIV disease: A comparison of simultaneous and alternating regimens                                                        |
| 8                                                                                | Havlir                         | 1998 | Maintenance antiretroviral therapies in HIV infected patients with undetectable plasma HIV RNA after triple-drug therapy. AIDS Clinical Trials Group Study 343 Team                                                                                   |
| 9                                                                                | Foudraine                      | 1998 | An open randomized controlled trial of zidovudine plus lamivudine versus stavudine plus lamivudine                                                                                                                                                    |
| 10                                                                               | Moyle                          | 1998 | Safety, pharmacokinetics, and antiretroviral activity of the potent, specific human immunodeficiency virus protease inhibitor nelfinavir: results of a phase I/II trial and extended follow-up in patients infected with human immunodeficiency virus |
| 11                                                                               | Pollard                        | 1999 | Safety and antiretroviral effects of combined didanosine and stavudine therapy in HIV-infected individuals with CD4 counts of 200 to 500 cells/mm <sup>3</sup>                                                                                        |
| 12                                                                               | Katlama                        | 2000 | The role of abacavir (ABC, 1592) in antiretroviral therapy-experienced patients: results from a randomized, double-blind, trial. CNA3002 European Study Team                                                                                          |
| 13                                                                               | Kuritzkes                      | 2000 | Continued lamivudine versus delavirdine in combination with indinavir and zidovudine or stavudine in lamivudine-experienced patients: results of Adult AIDS Clinical Trials Group protocol 370                                                        |
| 14                                                                               | McDowell                       | 2000 | Multiple-dose pharmacokinetics and pharmacodynamics of abacavir alone and in combination with zidovudine in human immunodeficiency virus-infected adults                                                                                              |
| 15                                                                               | Carosi                         | 2001 | Antiviral potency of HAART regimens and clinical success are not strictly coupled in real life conditions: evidence from the MASTER-1 study                                                                                                           |
| 16                                                                               | Smith                          | 2001 | A randomized trial of nelfinavir, ritonavir, or delavirdine in combination with saquinavir-SGC and stavudine in treatment-experienced HIV-1-infected patients                                                                                         |

**Table S4 – List of excluded studies by exclusion reason (continuation)**

| Studies excluded for not describing adverse events of interest for this review |                                |      |                                                                                                                                                                                                                |
|--------------------------------------------------------------------------------|--------------------------------|------|----------------------------------------------------------------------------------------------------------------------------------------------------------------------------------------------------------------|
| Amount                                                                         | First author or research group | Year | Title                                                                                                                                                                                                          |
| 17                                                                             | Røge                           | 2001 | Comparison of p-triglyceride levels among patients with human immunodeficiency virus on randomized treatment with ritonavir, indinavir or ritonavir/saquinavir                                                 |
| 18                                                                             | Saag                           | 2001 | Randomized, double-blind comparison of two nelfinavir doses plus nucleosides in HIV-infected patients (Agouron study 511)                                                                                      |
| 19                                                                             | Negredo                        | 2002 | Virological, immunological, and clinical impact of switching from protease inhibitors to nevirapine or to efavirenz in patients with human immunodeficiency virus infection and long-lasting viral suppression |
| 20                                                                             | Hoy                            | 2004 | Changes in mitochondrial DNA in peripheral blood mononuclear cells from HIV-infected patients with lipodystrophy randomized to receive abacavir                                                                |
| 21                                                                             | Garcia-Benayas                 | 2004 | Benefits in the lipid profile after substitution of abacavir for stavudine: a 48-week prospective study                                                                                                        |
| 22                                                                             | MacManus                       | 2004 | GW433908/ritonavir once daily in antiretroviral therapy-naive HIV-infected patients: absence of protease resistance at 48 weeks                                                                                |
| 23                                                                             | Dubé                           | 2007 | Effects of potent antiretroviral therapy on free testosterone levels and fat-free mass in men in a prospective, randomized trial: A5005s, a substudy of AIDS clinical trials group study 384                   |
| 24                                                                             | Green                          | 2007 | Lamivudine/abacavir maintains virological superiority over zidovudine/lamivudine and zidovudine/abacavir beyond 5 years in children                                                                            |
| 25                                                                             | Chêne                          | 2007 | Changes in the peripheral blood mtDNA levels in naive patients treated by different nucleoside reverse transcriptase inhibitor combinations and their association with subsequent lipodystrophy                |
| 26                                                                             | Milinkovic                     | 2007 | The impact of reducing stavudine dose versus switching to tenofovir on plasma lipids, body composition and mitochondrial function in HIV-infected patients                                                     |
| 27                                                                             | Schackman                      | 2007 | Racial differences in virologic failure associated with adherence and quality of life on efavirenz-containing regimens for initial HIV therapy: results of ACTG A5095                                          |
| 28                                                                             | Lafaurie                       | 2008 | Switch from zidovudine- to non-zidovudine-containing regimens is associated with modest haematological improvement and no obvious clinical benefit: a substudy of the ANRS 099 ALIZE trial                     |
| 29                                                                             | Arenas-Pinto                   | 2008 | The risk of developing peripheral neuropathy induced by nucleoside reverse transcriptase inhibitors decreases over time: evidence from the Delta trial                                                         |
| 30                                                                             | Seoane                         | 2008 | Lipid and apoprotein profile in HIV-1-infected patients after CD4-guided treatment interruption                                                                                                                |
| 31                                                                             | Grant                          | 2009 | Maintaining reduced viral fitness and CD4 response in HIV-infected patients with viremia receiving a boosted protease inhibitor                                                                                |
| 32                                                                             | Haubrich                       | 2009 | Metabolic outcomes in a randomized trial of nucleoside, nonnucleoside and protease inhibitor-sparing regimens for initial HIV treatment                                                                        |
| 33                                                                             | McComsey                       | 2009 | Changes in body composition with ritonavir-boosted and unboosted atazanavir treatment in combination with Lamivudine and Stavudine: a 96-week randomized, controlled study                                     |
| 34                                                                             | Duvivier                       | 2009 | Greater decrease in bone mineral density with protease inhibitor regimens compared with nonnucleoside reverse transcriptase inhibitor regimens in HIV-1 infected naive patients                                |
| 35                                                                             | Boothby                        | 2009 | Adipocyte differentiation, mitochondrial gene expression and fat distribution: differences between zidovudine and tenofovir after 6 months                                                                     |
| 36                                                                             | Brown                          | 2009 | Loss of bone mineral density after antiretroviral therapy initiation, independent of antiretroviral regimen                                                                                                    |

**Table S4 – List of excluded studies by exclusion reason (continuation)**

| Studies excluded for not describing adverse events of interest for this review |                                |      |                                                                                                                                                                                                                                                                       |
|--------------------------------------------------------------------------------|--------------------------------|------|-----------------------------------------------------------------------------------------------------------------------------------------------------------------------------------------------------------------------------------------------------------------------|
| Amount                                                                         | First author or research group | Year | Title                                                                                                                                                                                                                                                                 |
| 37                                                                             | Nguemaim                       | 2010 | Changes in lipid profiles in two groups of HIV-1 infected patients in cameroon on two treatment regimens with either efavirenz or nevirapine, in association with reverse transcriptase inhibitors                                                                    |
| 38                                                                             | Murphy                         | 2010 | Change to atazanavir/ritonavir treatment improves lipids but not endothelial function in patients on stable antiretroviral therapy                                                                                                                                    |
| 39                                                                             | Patricia                       | 2010 | Saquinavir/ritonavir monotherapy as a new nucleoside-sparing maintenance strategy in long-term virologically suppressed HIV-infected patients                                                                                                                         |
| 40                                                                             | Campo                          | 2010 | Switch from protease inhibitor- to efavirenz-based antiretroviral therapy improves quality of life, treatment satisfaction and adherence with low rates of virological failure in virologically suppressed patients                                                   |
| 41                                                                             | Moyle                          | 2010 | Phase 2a randomized controlled trial of short-term activity, safety, and pharmacokinetics of a novel nonnucleoside reverse transcriptase inhibitor, RDEA806, in HIV-1-positive, antiretroviral-naive subjects                                                         |
| 42                                                                             | Hatano                         | 2011 | A randomized, controlled trial of raltegravir intensification in antiretroviral-treated, HIV-infected patients with a suboptimal CD4+ T cell response                                                                                                                 |
| 43                                                                             | Hulgan                         | 2011 | European mitochondrial DNA haplogroups and metabolic changes during antiretroviral therapy in AIDS Clinical Trials Group Study A5142                                                                                                                                  |
| 44                                                                             | Lazzarin                       | 2011 | Pharmacokinetic (PK) and pharmacodynamic analyses of once- and twice-daily darunavir/ritonavir (DRV/r) in the odin trial                                                                                                                                              |
| 45                                                                             | Martin                         | 2011 | Predictors of limb fat gain in HIV positive patients following a change to tenofovir-emtricitabine or abacavir-lamivudine                                                                                                                                             |
| 46                                                                             | McComsey                       | 2011 | Peripheral and central fat changes in subjects randomized to abacavir-lamivudine or tenofovir-emtricitabine with atazanavir-ritonavir or efavirenz: ACTG Study A5224s                                                                                                 |
| 47                                                                             | Nguyen                         | 2011 | A randomized crossover study to compare efavirenz and etravirine treatment                                                                                                                                                                                            |
| 48                                                                             | Vrouenraets                    | 2011 | Persistent decline in estimated but not measured glomerular filtration rate on tenofovir may reflect tubular rather than glomerular toxicity                                                                                                                          |
| 49                                                                             | Cooper                         | 2011 | Beliefs about antiretroviral therapy, treatment adherence and quality of life in a 48-week randomised study of continuation of zidovudine/lamivudine or switch to tenofovir DF/emtricitabine, each with efavirenz                                                     |
| 50                                                                             | Briot                          | 2011 | Prospective one-year bone loss in treatment-naïve HIV+ men and women on single or multiple drug HIV therapies                                                                                                                                                         |
| 51                                                                             | MacInnes                       | 2011 | Maraviroc can improve lipid profiles in dyslipidemic patients with HIV: results from the MERIT trial                                                                                                                                                                  |
| 52                                                                             | Sax                            | 2011 | Abacavir/lamivudine versus tenofovir DF/emtricitabine as part of combination regimens for initial treatment of HIV: final results                                                                                                                                     |
| 53                                                                             | McComsey                       | 2011 | Bone mineral density and fractures in antiretroviral-naive persons randomized to receive abacavir-lamivudine or tenofovir disoproxil fumarate-emtricitabine along with efavirenz or atazanavir-ritonavir: Aids Clinical Trials Group A5224s, a substudy of ACTG A5202 |
| 54                                                                             | Hatano                         | 2012 | A randomized controlled trial assessing the effects of raltegravir intensification on endothelial function in treated HIV infection                                                                                                                                   |
| 55                                                                             | Trinh                          | 2012 | Lopinavir/ritonavir (LPV/r) combined with raltegravir (RAL) or tenofovir/emtricitabine (TDF/FTC) in antiretroviral-naive subjects: 96-week safety and efficacy results of the PROGRESS study                                                                          |
| 56                                                                             | Orkin                          | 2012 | Changes in patient-reported neuropsychiatric outcomes during the SENSE trial: first-line treatment with two nucleoside analogues plus etravirine or efavirenz                                                                                                         |

**Table S4 – List of excluded studies by exclusion reason (continuation)**

| Studies excluded for not describing adverse events of interest for this review |                                |      |                                                                                                                                                                                                                                               |
|--------------------------------------------------------------------------------|--------------------------------|------|-----------------------------------------------------------------------------------------------------------------------------------------------------------------------------------------------------------------------------------------------|
| Amount                                                                         | First author or research group | Year | Title                                                                                                                                                                                                                                         |
| 57                                                                             | Feeney                         | 2012 | Zidovudine/lamivudine but not nevirapine in combination with lopinavir/ritonavir decreases subcutaneous adipose tissue mitochondrial DNA                                                                                                      |
| 58                                                                             | Robertson                      | 2012 | Improved neuropsychological and neurological functioning across three antiretroviral regimens in diverse resource-limited settings: AIDS Clinical Trials Group study a5199, the International Neurological Study                              |
| 59                                                                             | Kuhn                           | 2012 | Switching children previously exposed to nevirapine to nevirapine-based treatment after initial suppression with a protease-inhibitor-based regimen: Long-term follow-up of a randomised, open-label trial                                    |
| 60                                                                             | Wilkins                        | 2013 | STaR Study: single tablet regimen rilpivirine/emtricitabine/ tenofovir DF is non-inferior to efavirenz/emtricitabine/ tenofovir DF in ART-naive adults regardless of baseline viral load and CD4 + count                                      |
| 61                                                                             | Martin                         | 2013 | HIV lipodystrophy in participants randomised to lopinavir/ritonavir (LPV/r) +2-3 nucleoside/nucleotide reverse transcriptase inhibitors (N(t)RTI) or LPV/r + raltegravir as second-line antiretroviral therapy                                |
| 62                                                                             | Menezes                        | 2013 | The early effects of stavudine compared with tenofovir on adipocyte gene expression, mitochondrial DNA copy number and metabolic parameters in South African HIV-infected patients: a randomized trial                                        |
| 63                                                                             | ENCORE1 Study Group            | 2014 | Efficacy of 400 mg efavirenz versus standard 600 mg dose in HIV-infected, antiretroviral-naive adults (ENCORE1): a randomised, double-blind, placebo-controlled, non-inferiority trial                                                        |
| 64                                                                             | Guaraldi                       | 2014 | Switching to darunavir/ritonavir monotherapy vs. triple-therapy on body fat redistribution and bone mass in HIV-infected adults: the Monarch randomized controlled trial                                                                      |
| 65                                                                             | Haskelberg                     | 2014 | Bone mineral density over 96 weeks in adults failing first-line therapy randomized to raltegravir/lopinavir/ritonavir compared with standard second-line therapy                                                                              |
| 66                                                                             | Hulgan                         | 2014 | Urinary eicosanoid metabolites in HIV-infected women with central obesity switching to raltegravir: An analysis from the women, integrase, and fat accumulation trial                                                                         |
| 67                                                                             | Wyatt                          | 2014 | Changes in proteinuria and albuminuria with initiation of antiretroviral therapy: data from a randomized trial comparing tenofovir disoproxil fumarate/emtricitabine versus abacavir/lamivudine                                               |
| 68                                                                             | Langebeek                      | 2014 | A simplified combination antiretroviral therapy regimen enhances adherence, treatment satisfaction and quality of life: results of a randomized clinical trial                                                                                |
| 69                                                                             | Smith                          | 2014 | Outcomes by sex following treatment initiation with atazanavir plus ritonavir or efavirenz with abacavir/lamivudine or tenofovir/emtricitabine                                                                                                |
| 70                                                                             | Shiau                          | 2014 | Sex differences in responses to antiretroviral treatment in south african HIV-infected children on ritonavir-boosted lopinavir- and nevirapine-based treatment                                                                                |
| 71                                                                             | Hsieh                          | 2015 | Increased bone resorption during tenofovir plus lopinavir/ritonavir therapy in Chinese individuals with HIV                                                                                                                                   |
| 72                                                                             | Brunetta                       | 2015 | Patient-Reported Outcomes After a Switch to a Single-Tablet Regimen of Rilpivirine, Emtricitabine, and Tenofovir DF in HIV-1-Positive, Virologically Suppressed Individuals: Additional Findings From a Randomized, Open-Label, 48-Week Trial |
| 73                                                                             | Santos                         | 2015 | The Lipid-Lowering Effect of Tenofovir/Emtricitabine: a Randomized, Crossover, Double-Blind, Placebo-Controlled Trial                                                                                                                         |

**Table S4 – List of excluded studies by exclusion reason (continuation)**

| Studies excluded for not describing adverse events of interest for this review |                                |      |                                                                                                                                                                                                                                                        |
|--------------------------------------------------------------------------------|--------------------------------|------|--------------------------------------------------------------------------------------------------------------------------------------------------------------------------------------------------------------------------------------------------------|
| Amount                                                                         | First author or research group | Year | Title                                                                                                                                                                                                                                                  |
| 74                                                                             | Satchell                       | 2015 | A prospective, randomised study to assess safety, changes in platelet reactivity, plasma cardiac biomarkers, immunological and metabolic parameters in HIV-1-infected subjects undergoing switch in antiretroviral therapy                             |
| 75                                                                             | Tiraboschi                     | 2015 | The impact of boosted darunavir monotherapy on neurocognitive function and quality of life: results from a prospective randomised study                                                                                                                |
| 76                                                                             | Oforokun                       | 2015 | Comparison of the metabolic effects of ritonavir-boosted darunavir or atazanavir versus raltegravir, and the impact of ritonavir plasma exposure: ACTG 5257                                                                                            |
| 77                                                                             | Gates                          | 2016 | Maraviroc-intensified combined antiretroviral therapy improves cognition in virally suppressed HIV-associated neurocognitive disorder                                                                                                                  |
| 78                                                                             | Crespo                         | 2016 | Improvement of BMD after Switching from Lopinavir/R Plus Two Nucleos(T)ide Reverse Transcriptase Inhibitors to Lopinavir/R Plus Lamivudine: OLE-LIP Substudy                                                                                           |
| 79                                                                             | Kambugu                        | 2016 | Neurocognitive Function at the First-Line Failure and on the Second-Line Antiretroviral Therapy in Africa: Analyses From the EARNEST Trial                                                                                                             |
| 80                                                                             | Karris                         | 2016 | A randomized controlled clinical trial on the impact of CCR5 blockade with maraviroc in early infection on T-cell dynamics                                                                                                                             |
| 81                                                                             | Martinez                       | 2017 | Switching from boosted protease inhibitors (PI/r) to dolutegravir (DTG) in virologically suppressed HIV-infected patients with high cardiovascular risk: 48-week effects on subclinical cardiovascular disease                                         |
| 82                                                                             | Saumoy                         | 2017 | Atherogenic properties of LDL particles after switching from Truvada or Kivexa plus lopinavir/r to lamivudine plus lopinavir/r: OLE-MET substudy                                                                                                       |
| 83                                                                             | Spinner                        | 2017 | Pharmacokinetics of once-daily dolutegravir and ritonavir-boosted darunavir in HIV patients: the DUALIS study                                                                                                                                          |
| 84                                                                             | Walmsley                       | 2017 | Sword 1 and 2: subgroup analysis of 48 week results by age, race and gender                                                                                                                                                                            |
| 85                                                                             | Wohl                           | 2017 | Viral blips were infrequent in HIV-1-infected virologically-suppressed adults treated with tenofovir alafenamide or tenofovir df rilpivirine-containing regimens                                                                                       |
| 86                                                                             | Kelesidis                      | 2017 | Changes in plasma levels of oxidized lipoproteins and lipoprotein subfractions with atazanavir-, raltegravir-, darunavir-based initial antiviral therapy and associations with common carotid artery intima-media thickness: ACTG 5260s                |
| 87                                                                             | Shikuma                        | 2018 | Sleep and neuropsychological performance in HIV+ subjects on efavirenz-based therapy and response to switch in therapy                                                                                                                                 |
| 88                                                                             | Vos                            | 2018 | Lipid levels, insulin resistance and cardiovascular risk over 96 weeks of antiretroviral therapy: a randomised controlled trial comparing low-dose stavudine and tenofovir                                                                             |
| 89                                                                             | Morales-Ramirez                | 2018 | Safety, efficacy, and dose response of the maturation inhibitor GSK3532795 (formerly known as BMS-955176) plus tenofovir/emtricitabine once daily in treatment-naïve HIV-1-infected adults: Week 24 primary analysis from a randomized Phase IIb trial |
| 90                                                                             | Robertson                      | 2018 | Similar neurocognitive outcomes after 48 weeks in HIV-1-infected participants randomized to continue tenofovir/emtricitabine + atazanavir/ritonavir or simplify to abacavir/lamivudine + atazanavir                                                    |
| 91                                                                             | El Kamari                      | 2019 | Lower Pretreatment Gut Integrity Is Independently Associated With Fat Gain on Antiretroviral Therapy                                                                                                                                                   |
| 92                                                                             | Hamzah                         | 2019 | Early safety of tenofovir alafenamide in patients with a history of tubulopathy on tenofovir disoproxil fumarate: a randomized controlled clinical trial                                                                                               |

**Table S4 – List of excluded studies by exclusion reason (continuation)**

| Studies excluded for not describing adverse events of interest for this review |                                |      |                                                                                                                                                                                                                                             |
|--------------------------------------------------------------------------------|--------------------------------|------|---------------------------------------------------------------------------------------------------------------------------------------------------------------------------------------------------------------------------------------------|
| Amount                                                                         | First author or research group | Year | Title                                                                                                                                                                                                                                       |
| 93                                                                             | Bednasz                        | 2019 | Race/Ethnicity and Protease Inhibitor Use Influence Plasma Tenofovir Exposure in Adults Living with HIV-1 in AIDS Clinical Trials Group Study A5202                                                                                         |
| 94                                                                             | Sculier                        | 2019 | Dolutegravir/emtricitabine dual therapy is non-inferior to standard combination antiretroviral therapy in maintaining HIV suppression throughout 48 weeks (SIMPL'HIV study)                                                                 |
| 95                                                                             | Wang                           | 2019 | Switching from a 3-drug tenofovir alafenamide (TAF)-based regimen (TBR) to a 2-drug dolutegravir/lamivudine (2DR, DTG/3TC FDC) was not associated with a higher frequency of intermittent viremia in suppressed patients in the TANGO study |
| 96                                                                             | Landman                        | 2019 | ANRS 170 QUATUOR 4/7 days maintenance strategy in antiretroviral treated adults with HIV-1 infection: an open randomised parallel non-inferiority phase III trial                                                                           |
| 97                                                                             | Debroy                         | 2020 | Antiretroviral therapy initiation is associated with decreased visceral and subcutaneous adipose tissue density in people living with HIV                                                                                                   |
| 98                                                                             | Hu                             | 2020 | Correlation between cardiovascular risk factors in hiv-infected patients and three highly active anti-retroviral therapy regimens                                                                                                           |
| 99                                                                             | Olliges                        | 2021 | Health-related quality-of-life in people living with HIV after switching to dual therapy with ritonavir-boosted darunavir + dolutegravir: a DUALIS sub-study                                                                                |
| Studies excluded for being posthoc analysis                                    |                                |      |                                                                                                                                                                                                                                             |
| Amount                                                                         | First author or research group | Year | Title                                                                                                                                                                                                                                       |
| 1                                                                              | Fisac                          | 2003 | A comparison of the effects of nevirapine and nelfinavir on metabolism and body habitus in antiretroviral-naïve human immunodeficiency virus-infected patients: a randomized controlled study                                               |
| 2                                                                              | Lafeuillade                    | 2003 | Comparison of metabolic abnormalities and clinical lipodystrophy 48 weeks after switching from HAART to Trizivir versus continued HAART: the Trizal study                                                                                   |
| 3                                                                              | Ananworanich                   | 2005 | Incidence and risk factors for rash in Thai patients randomized to regimens with nevirapine, efavirenz or both drugs                                                                                                                        |
| 4                                                                              | Malan                          | 2010 | Gastrointestinal tolerability and quality of life in antiretroviral-naïve HIV-1-infected patients: data from the CASTLE study                                                                                                               |
| 5                                                                              | Sierra-Madero                  | 2010 | Efficacy and safety of maraviroc versus efavirenz, both with zidovudine/lamivudine: 96-week results from the MERIT study                                                                                                                    |
| 6                                                                              | Winston                        | 2010 | Neuropsychiatric adverse events with ritonavir-boosted darunavir monotherapy in HIV-infected individuals: a randomised prospective study                                                                                                    |
| 7                                                                              | Squires                        | 2011 | Comparative gender analysis of the efficacy and safety of atazanavir/ritonavir and lopinavir/ritonavir at 96 weeks in the CASTLE study                                                                                                      |
| 8                                                                              | Uy                             | 2011 | Treatment of advanced HIV disease in antiretroviral-naïve HIV-1-infected patients receiving once-daily atazanavir/ritonavir or twice-daily lopinavir/ritonavir, each in combination with tenofovir disoproxil fumarate and emtricitabine    |
| 9                                                                              | Fox                            | 2011 | Improvement in vitamin D deficiency following antiretroviral regime change: Results from the MONET trial                                                                                                                                    |
| 10                                                                             | Kolta                          | 2011 | Fat tissue distribution changes in HIV-infected patients treated with lopinavir/ritonavir. Results of the MONARK trial                                                                                                                      |
| 11                                                                             | Focà                           | 2012 | Prospective evaluation of bone markers, parathormone and 1,25-(OH) <sub>2</sub> vitamin D in HIV-positive patients after the initiation of tenofovir/emtricitabine with atazanavir/ritonavir or efavirenz                                   |

**Table S4 – List of excluded studies by exclusion reason (continuation)**

| Studies excluded for being posthoc analysis |                                |      |                                                                                                                                                                                                                                                                                                                  |
|---------------------------------------------|--------------------------------|------|------------------------------------------------------------------------------------------------------------------------------------------------------------------------------------------------------------------------------------------------------------------------------------------------------------------|
| Amount                                      | First author or research group | Year | Title                                                                                                                                                                                                                                                                                                            |
| 12                                          | Bunupuradah                    | 2012 | Neurocognitive impairment in patients randomized to second-line lopinavir/ritonavir-based antiretroviral therapy vs. lopinavir/ritonavir monotherapy                                                                                                                                                             |
| 13                                          | Erlandson                      | 2013 | Weight and lean body mass change with antiretroviral initiation and impact on bone mineral density                                                                                                                                                                                                               |
| 14                                          | Martínez                       | 2013 | Abacavir/lamivudine versus tenofovir/emtricitabine in virologically suppressed patients switching from ritonavir-boosted protease inhibitors to raltegravir                                                                                                                                                      |
| 15                                          | Erlandson                      | 2014 | Impact of randomized antiretroviral therapy initiation on glucose metabolism                                                                                                                                                                                                                                     |
| 16                                          | Arribas                        | 2014 | Simplification to Stribild vs continuation of RTV-boosted DRV with FTC and TDF in virologically suppressed HIV adults: a STRATEGY-PI subgroup analysis                                                                                                                                                           |
| 17                                          | Romo                           | 2014 | Renal and metabolic toxicities following initiation of HIV-1 treatment regimen in a diverse, multinational setting: a focused safety analysis of ACTG PEARLS (A5175)                                                                                                                                             |
| 18                                          | Girard                         | 2014 | Comparison of renal changes with lopinavir/ritonavir plus raltegravir or tenofovir/emtricitabine in the PROGRESS study                                                                                                                                                                                           |
| 19                                          | Bernardino                     | 2015 | Bone mineral density and inflammatory and bone biomarkers after darunavir-ritonavir combined with either raltegravir or tenofovir-emtricitabine in antiretroviral-naïve adults with HIV-1: a substudy of the NEAT001/ANRS143 randomised trial                                                                    |
| 20                                          | Brown                          | 2015 | Changes in Bone Mineral Density After Initiation of Antiretroviral Treatment With Tenofovir Disoproxil Fumarate/Emtricitabine Plus Atazanavir/Ritonavir, Darunavir/Ritonavir, or Raltegravir                                                                                                                     |
| 21                                          | Bwakura-Dangarembizi           | 2015 | Prevalence of lipodystrophy and metabolic abnormalities in HIV-infected African children after 3 years on first-line antiretroviral therapy                                                                                                                                                                      |
| 22                                          | Cahn                           | 2015 | Dolutegravir versus raltegravir in ARV-experienced INI-naïve HIV+ adults: 48-week subgroup analysis of Latin American subjects in the SAILING study                                                                                                                                                              |
| 23                                          | Achan                          | 2016 | Growth recovery among HIV-infected children randomized to lopinavir/ritonavir or NNRTI-based antiretroviral therapy                                                                                                                                                                                              |
| 24                                          | Gallant                        | 2017 | Atazanavir Plus Cobicistat: Week 48 and Week 144 Subgroup Analyses of a Phase 3, Randomized, Double-Blind, Active-Controlled Trial                                                                                                                                                                               |
| 25                                          | Squires                        | 2017 | Influence of sex/gender and race on responses to raltegravir combined with tenofovir-emtricitabine in treatment-naïve human immunodeficiency virus-1 infected patients: pooled analyses of the STARTMRK and QDMRK studies                                                                                        |
| 26                                          | Squires                        | 2017 | Response by gender of HIV-1-infected subjects treated with abacavir/lamivudine plus atazanavir, with or without ritonavir, for 144 weeks                                                                                                                                                                         |
| 27                                          | Post                           | 2017 | Efficacy and safety of emtricitabine/tenofovir alafenamide (FTC/TAF) vs. emtricitabine/tenofovir disoproxil fumarate (FTC/TDF) as a backbone for treatment of HIV-1 infection in virologically suppressed adults: subgroup analysis by third agent of a randomized, double-blind, activecontrolled phase 3 trial |
| 28                                          | Goldstein                      | 2017 | Week 96 efficacy and safety of tenofovir alafenamide (TAF) versus tenofovir disoproxil fumarate (TDF) in older, hivinfected virologically-suppressed adults                                                                                                                                                      |
| 29                                          | Arenas-Pinto                   | 2018 | Risk of Suicidal Behavior With Use of Efavirenz: Results from the Strategic Timing of Antiretroviral Treatment Trial                                                                                                                                                                                             |
| 30                                          | Colella                        | 2018 | Potential associations between atazanavir exposure and clinical outcome: a pharmacokinetic sub-study from the MODAt randomized trial                                                                                                                                                                             |



**Table S4 – List of excluded studies by exclusion reason (continuation)**

| Studies excluded for being posthoc analysis                              |                                |      |                                                                                                                                                                                                                                                                                                                                    |
|--------------------------------------------------------------------------|--------------------------------|------|------------------------------------------------------------------------------------------------------------------------------------------------------------------------------------------------------------------------------------------------------------------------------------------------------------------------------------|
| Amount                                                                   | First author or research group | Year | Title                                                                                                                                                                                                                                                                                                                              |
| 31                                                                       | Bernardino                     | 2019 | Body composition and adipokines changes after initial treatment with darunavir-ritonavir plus either raltegravir or tenofovir disoproxil fumarate-emtricitabine: A substudy of the NEAT001/ANRS143 randomised trial                                                                                                                |
| 32                                                                       | Ackerman                       | 2021 | Long-term efficacy and safety of fostemsavir among subgroups of heavily treatment-experienced adults with HIV-1                                                                                                                                                                                                                    |
| 33                                                                       | Kumar                          | 2021 | Brief Report: Switching to DOR/3TC/TDF Maintains HIV-1 Virologic Suppression Through Week 144 in the DRIVE-SHIFT Trial                                                                                                                                                                                                             |
| Studies excluded for using multiple ARV regimens in their arms           |                                |      |                                                                                                                                                                                                                                                                                                                                    |
| Amount                                                                   | First author or research group | Year | Title                                                                                                                                                                                                                                                                                                                              |
| 1                                                                        | Orkin                          | 2018 | Efficacy and safety of switching from boosted protease inhibitors plus emtricitabine and tenofovir disoproxil fumarate regimens to single-tablet darunavir, cobicistat, emtricitabine, and tenofovir alafenamide at 48 weeks in adults with virologically suppressed HIV-1 (EMERALD): a phase 3, randomised, non-inferiority trial |
| 2                                                                        | Sax                            | 2009 | Abacavir-lamivudine versus tenofovir-emtricitabine for initial HIV-1 therapy                                                                                                                                                                                                                                                       |
| 3                                                                        | Bonnet                         | 2013 | Early loss of bone mineral density is correlated with a gain of fat mass in patients starting a protease inhibitor containing regimen: the prospective Lipotrip study                                                                                                                                                              |
| 4                                                                        | John                           | 2003 | Randomized, controlled, 48-week study of switching stavudine and/or protease inhibitors to combivir/abacavir to prevent or reverse lipotrophy in HIV-infected patients                                                                                                                                                             |
| 5                                                                        | Schooley                       | 2002 | Tenofovir DF in antiretroviral-experienced patients: results from a 48-week, randomized, double-blind study                                                                                                                                                                                                                        |
| 6                                                                        | Waters                         | 2010 | A Phase IV, double-blind, multi-centre, randomised, placebo-controlled, pilot study to assess the feasibility of switching individuals receiving efavirenz (EFV) with continuing central nervous system (CNS) adverse events (AE) to once-daily etravirine (ETR)                                                                   |
| Studies excluded for not describing adverse events specifically in women |                                |      |                                                                                                                                                                                                                                                                                                                                    |
| Amount                                                                   | First author or research group | Year | Title                                                                                                                                                                                                                                                                                                                              |
| 1                                                                        | Richman                        | 1987 | The toxicity of azidothymidine (AZT) in the treatment of patients with AIDS and AIDS-related complex. A double-blind, placebo-controlled trial                                                                                                                                                                                     |
| 2                                                                        | NR                             | 1989 | The Safety and Effectiveness of Zidovudine (AZT) in the Treatment of HIV Infection in Patients With AIDS and Advanced ARC                                                                                                                                                                                                          |
| 3                                                                        | NR                             | 1990 | A Multi-Center Clinical Trial To Evaluate Azidothymidine (AZT) in the Treatment of Human Immunodeficiency Virus (HIV) Infection in Patients With AIDS Post First Episode PCP                                                                                                                                                       |
| 4                                                                        | Bozzette                       | 1991 | Peripheral nerve function in persons with asymptomatic or minimally symptomatic HIV disease: absence of zidovudine neurotoxicity                                                                                                                                                                                                   |
| 5                                                                        | Fischl                         | 1993 | Zalcitabine compared with zidovudine in patients with advanced HIV-1 infection who received previous zidovudine therapy                                                                                                                                                                                                            |
| 6                                                                        | Mulder                         | 1994 | Zidovudine twice daily in asymptomatic subjects with HIV infection and a high risk of progression to AIDS: a randomized, double-blind placebo-controlled study. The European-Australian Collaborative Group (Study 017)                                                                                                            |
| 7                                                                        | NR                             | 1994 | The Safety of Different Dose Levels of Zidovudine in HIV-Infected Children                                                                                                                                                                                                                                                         |

**Table S4 – List of excluded studies by exclusion reason (continuation)**

| Studies excluded for not describing adverse events specifically in women |                                |      |                                                                                                                                                                                                                                                                                    |
|--------------------------------------------------------------------------|--------------------------------|------|------------------------------------------------------------------------------------------------------------------------------------------------------------------------------------------------------------------------------------------------------------------------------------|
| Amount                                                                   | First author or research group | Year | Title                                                                                                                                                                                                                                                                              |
| 8                                                                        | Dolin                          | 1995 | Zidovudine compared with didanosine in patients with advanced HIV type 1 infection and little or no previous experience with zidovudine. AIDS Clinical Trials Group                                                                                                                |
| 9                                                                        | Fischl                         | 1995 | Combination and monotherapy with zidovudine and zalcitabine in patients with advanced HIV disease                                                                                                                                                                                  |
| 10                                                                       | Montaner                       | 1995 | Didanosine compared with continued zidovudine therapy for HIV-infected patients with 200 to 500 CD4 cells/mm <sup>3</sup> : A double-blind, randomized, controlled trial                                                                                                           |
| 11                                                                       | Petersen                       | 1995 | Dose-related activity of stavudine in patients infected with human immunodeficiency virus                                                                                                                                                                                          |
| 12                                                                       | Kinloch-De Loës                | 1995 | A controlled trial of zidovudine in primary human immunodeficiency virus infection                                                                                                                                                                                                 |
| 13                                                                       | Bartlett                       | 1996 | Lamivudine plus zidovudine compared with zalcitabine plus zidovudine in patients with HIV infection. A randomized, double-blind, placebo-controlled trial. North American HIV Working Party                                                                                        |
| 14                                                                       | Carr                           | 1996 | A controlled trial of nevirapine plus zidovudine versus zidovudine alone in p24 antigenaemic HIV-infected patients. The Dutch-Italian-Australian Nevirapine Study Group                                                                                                            |
| 15                                                                       | D'Aquila                       | 1996 | Nevirapine, zidovudine, and didanosine compared with zidovudine and didanosine in patients with HIV-1 infection. A randomized, double-blind, placebo-controlled trial. National Institute of Allergy and Infectious Diseases AIDS Clinical Trials Group Protocol 241 Investigators |
| 16                                                                       | Katlama                        | 1996 | Safety and efficacy of lamivudine-zidovudine combination therapy in antiretroviral-naïve patients. A randomized controlled comparison with zidovudine monotherapy. Lamivudine European HIV Working Group                                                                           |
| 17                                                                       | Spruance                       | 1997 | Clinical efficacy of monotherapy with stavudine compared with zidovudine in HIV-infected, zidovudine-experienced patients. A randomized, double-blind, controlled trial. Bristol-Myers Squibb Stavudine/019 Study Group                                                            |
| 18                                                                       | Sudre                          | 1997 | Low doses of zidovudine plus didanosine are less effective than higher doses of didanosine monotherapy: a randomized trial in patients pretreated with zidovudine                                                                                                                  |
| 19                                                                       | Cohen                          | 1998 | A randomized trial of the effect of ritonavir in maintaining quality of life in advanced HIV disease                                                                                                                                                                               |
| 20                                                                       | Henry                          | 1998 | A randomized, controlled, double-blind study comparing the survival benefit of four different reverse transcriptase inhibitor therapies (three-drug, two-drug, and alternating drug) for the treatment of advanced AIDS                                                            |
| 21                                                                       | McKinney                       | 1998 | A randomized study of combined zidovudine-lamivudine versus didanosine monotherapy in children with symptomatic therapy-naïve HIV-1 infection. The Pediatric AIDS Clinical Trials Group Protocol 300 Study Team                                                                    |
| 22                                                                       | Montaner                       | 1998 | The effects of lamivudine treatment on HIV-1 disease progression are highly correlated with plasma HIV-1 RNA and CD4 cell count                                                                                                                                                    |
| 23                                                                       | Saag                           | 1998 | Antiretroviral effect and safety of abacavir alone and in combination with zidovudine in HIV-infected adults. Abacavir Phase 2 Clinical Team                                                                                                                                       |
| 24                                                                       | Staszewski                     | 1998 | A dose-ranging study to evaluate the safety and efficacy of abacavir alone or in combination with zidovudine and lamivudine in antiretroviral treatment-naïve subjects                                                                                                             |
| 25                                                                       | Pialoux                        | 1998 | A randomized trial of three maintenance regimens given after three months of induction therapy with zidovudine, lamivudine, and indinavir in previously untreated HIV-1-infected patients                                                                                          |

**Table S4 – List of excluded studies by exclusion reason (continuation)**

| Studies excluded for not describing adverse events specifically in women |                                |      |                                                                                                                                                                                                                                                                |
|--------------------------------------------------------------------------|--------------------------------|------|----------------------------------------------------------------------------------------------------------------------------------------------------------------------------------------------------------------------------------------------------------------|
| Amount                                                                   | First author or research group | Year | Title                                                                                                                                                                                                                                                          |
| 26                                                                       | NR                             | 1998 | A Phase IIIb, Randomized, Open-Label, Multicenter Study to Evaluate the Safety and Efficacy of 2NRTI/Abacavir versus Continued 2NRTI/PI Treatment in HIV-1 Infected Subjects with Undetectable Plasma HIV-1 RNA Levels                                         |
| 27                                                                       | García                         | 1999 | A randomized study comparing triple versus double antiretroviral therapy or no treatment in HIV-1-infected patients in very early stage disease: the Spanish Earth-1 study                                                                                     |
| 28                                                                       | Krown                          | 1999 | Phase II, randomized, open-label, community-based trial to compare the safety and activity of combination therapy with recombinant interferon-alpha2b and zidovudine versus zidovudine alone in patients with asymptomatic to mildly symptomatic HIV infection |
| 29                                                                       | Kirk                           | 1999 | Combination therapy containing ritonavir plus saquinavir has superior short-term antiretroviral efficacy: a randomized trial                                                                                                                                   |
| 30                                                                       | NR                             | 1999 | A Study of T-20 in HIV-Positive Adults                                                                                                                                                                                                                         |
| 31                                                                       | NR                             | 1999 | A Study to Compare the Effectiveness of Two Anti-HIV Drug Combinations                                                                                                                                                                                         |
| 32                                                                       | NR                             | 1999 | The Safety and Effectiveness of Three Anti-HIV Drug Combinations in HIV-Infected Patients Who Have Taken AZT                                                                                                                                                   |
| 33                                                                       | NR                             | 1999 | The Effectiveness of Three Anti-HIV Drug Combinations in HIV-Infected Patients Who Have Never Used Anti-HIV Drugs                                                                                                                                              |
| 34                                                                       | NR                             | 1999 | A Multicenter, Open-Label, Randomized, 24-Week Study to Compare the Safety and Activity of Indinavir Sulfate, 800 Mg q 8 h Versus 1,200 Mg q 12 h in Combination With Zidovudine and 3TC                                                                       |
| 35                                                                       | NR                             | 1999 | The Safety and Effectiveness of Lamivudine Plus Stavudine or Zidovudine in HIV-Infected Patients Who Have Taken Zidovudine                                                                                                                                     |
| 36                                                                       | NR                             | 1999 | Comparison of Ro 31-8959 Plus Zidovudine (AZT) Versus AZT Plus Zalcitabine (ddC) Versus Ro 31-8959 Plus AZT Plus ddC                                                                                                                                           |
| 37                                                                       | NR                             | 1999 | A Study to Find the Best Dosing Schedule for Delavirdine, Zidovudine, and Indinavir in HIV-Positive Patients                                                                                                                                                   |
| 38                                                                       | NR                             | 1999 | Virologic and Immunologic Activity of Continued Lamivudine (3TC) vs Delavirdine (DLV) in Combination With Indinavir (IDV) and Zidovudine (ZDV) or Stavudine (d4T) in 3TC-Experienced Subjects                                                                  |
| 39                                                                       | NR                             | 1999 | A Comparison of Zidovudine (AZT) Used Alone or in Combination With Didanosine (ddI) or Dideoxycytidine (ddC) in HIV-Infected Patients                                                                                                                          |
| 40                                                                       | NR                             | 1999 | A Six-Month Safety and Antiviral Study in HIV-1 Seropositive, AZT-Experienced Patients With CD4 Counts Less Than or Equal to 50 Cells/mm <sup>3</sup> to Evaluate MK-639 Alone Versus Zidovudine (AZT) and 3TC Versus the Combination of MK-639 With AZT/3TC   |
| 41                                                                       | NR                             | 1999 | A Study of Indinavir Taken With or Without DMP 266                                                                                                                                                                                                             |
| 42                                                                       | NR                             | 1999 | The Safety and Effectiveness of Zidovudine in the Treatment of HIV-Infected Children With Mild to Moderate Symptoms                                                                                                                                            |
| 43                                                                       | NR                             | 1999 | A Study of Viracept in HIV-Positive Women                                                                                                                                                                                                                      |
| 44                                                                       | NR                             | 1999 | A Study of Indinavir Sulfate Given Together With Stavudine to HIV-Positive Patients                                                                                                                                                                            |
| 45                                                                       | NR                             | 1999 | A Comparison of Lamivudine and Zidovudine, Used Alone and Together, in HIV-Infected Patients Who Have Not Used Zidovudine in the Past                                                                                                                          |
| 46                                                                       | NR                             | 1999 | A Comparison of Zidovudine Plus Lamivudine Versus ddI Used Alone or in Combination With Zidovudine in HIV-1 Infected Children                                                                                                                                  |
| 47                                                                       | NR                             | 1999 | The Safety and Effectiveness of Nevirapine and Zidovudine, Given Separately and Together, in HIV-1 Infected Patients Who Have No Symptoms of the Disease                                                                                                       |

**Table S4 – List of excluded studies by exclusion reason (continuation)**

| Studies excluded for not describing adverse events specifically in women |                                |      |                                                                                                                                                                                                                                                              |
|--------------------------------------------------------------------------|--------------------------------|------|--------------------------------------------------------------------------------------------------------------------------------------------------------------------------------------------------------------------------------------------------------------|
| Amount                                                                   | First author or research group | Year | Title                                                                                                                                                                                                                                                        |
| 48                                                                       | NR                             | 1999 | Safety and Effectiveness of Giving Indinavir and Nelfinavir to HIV-Infected Patients                                                                                                                                                                         |
| 49                                                                       | NR                             | 1999 | A Study on the Safety and Effectiveness of Adefovir Dipivoxil in Combination With Anti-HIV Therapy (HAART) in HIV-Positive Patients                                                                                                                          |
| 50                                                                       | NR                             | 1999 | A Multi-Center, Randomized, Double-Blind, Placebo-Controlled Study of the Efficacy and Safety of Adefovir Dipivoxil When Added to Standard Antiretroviral Therapy for the Treatment of HIV-Infected Patients With CD4 Cell Counts $\geq$ 200/mm <sup>3</sup> |
| 51                                                                       | NR                             | 1999 | The Safety and Effectiveness of Indinavir Sulfate Plus Efavirenz                                                                                                                                                                                             |
| 52                                                                       | NR                             | 1999 | A Comparison of 141W94 and Indinavir in HIV-Infected Patients                                                                                                                                                                                                |
| 53                                                                       | NR                             | 1999 | A Comparison of Two Dose Levels of Indinavir Combined With Two Nucleoside Analogue Reverse Transcriptase Inhibitors (NRTIs) in HIV-Infected Patients                                                                                                         |
| 54                                                                       | NR                             | 1999 | A Randomized, Parallel Arm, Comparative, Open Label, Multicenter Study of the Activity and Safety of Two Formulations of Saquinavir in Combination With Other Antiretroviral Drugs                                                                           |
| 55                                                                       | NR                             | 1999 | A Comparison of Saquinavir Hard- and Soft-Gelatin Capsules in HIV-Infected Patients                                                                                                                                                                          |
| 56                                                                       | NR                             | 1999 | A Study to Compare the Safety and Effectiveness of Indinavir Combined With Stavudine and Lamivudine                                                                                                                                                          |
| 57                                                                       | NR                             | 1999 | A Phase III Randomized Double-Blind, Multicenter Study to Evaluate the Safety and Efficacy of 3TC/ZDV/1592U89 and 3TC/ZDV/IDV in HIV-1 Infected Antiretroviral Therapy-Naive Subjects                                                                        |
| 58                                                                       | NR                             | 1999 | A Study Comparing Two Forms of Didanosine in HIV-infected Patients                                                                                                                                                                                           |
| 59                                                                       | NR                             | 1999 | The Safety and Effectiveness of Adefovir Dipivoxil Plus Indinavir Combined With Zidovudine or Lamivudine or Stavudine in HIV-Infected Patients Who Have Not Taken Anti-HIV Drugs                                                                             |
| 60                                                                       | NR                             | 1999 | A Study to Compare the Safety and Effectiveness of Two Dosing Schedules of Lamivudine in Combination With Two Other Anti-HIV Drugs                                                                                                                           |
| 61                                                                       | NR                             | 1999 | A Study of Three Drug Combination Therapies in HIV-Infected Patients Who Have Never Been Treated With Anti-HIV Drugs                                                                                                                                         |
| 62                                                                       | NR                             | 1999 | A Comparison of Two Triple-Drug Combinations in Patients Who Have Never Been Treated With Anti-HIV Drugs                                                                                                                                                     |
| 63                                                                       | NR                             | 1999 | A Study of Two Anti-HIV Drug Combinations in HIV-Infected Patients                                                                                                                                                                                           |
| 64                                                                       | NR                             | 1999 | The Safety and Effectiveness of Lamivudine Plus Zidovudine, Used With and Without 1592U89, in HIV-1 Infected Patients Who Have Never Taken Anti-HIV Drugs                                                                                                    |
| 65                                                                       | NR                             | 1999 | The Safety and Effectiveness of Zidovudine Plus Lamivudine, Used With and Without 1592U89, in HIV-1 Infected Children Who Have Taken Anti-HIV-1 Drugs                                                                                                        |
| 66                                                                       | NR                             | 1999 | A Study to Compare the Effects of Two Anti-HIV Drug Combinations on the Immune Systems of HIV-Infected Patients                                                                                                                                              |
| 67                                                                       | NR                             | 1999 | The Safety and Effectiveness of MK-639 and Zidovudine, Used Alone and Together, in HIV-Infected Patients Who Have Never Taken Anti-HIV Drugs                                                                                                                 |
| 68                                                                       | NR                             | 1999 | A Study of 1592U89 in Combination With Protease Inhibitors in HIV-Infected Patients Who Have Never Taken Anti-HIV Drugs                                                                                                                                      |
| 69                                                                       | NR                             | 1999 | Safety and Effectiveness of Four Anti-HIV Drug Combinations in HIV-Infected Children and Teens                                                                                                                                                               |
| 70                                                                       | NR                             | 1999 | Study of a New Protease Inhibitor, BMS-232632, in Combination With Other Anti-HIV Drugs                                                                                                                                                                      |

**Table S4 – List of excluded studies by exclusion reason (continuation)**

| Studies excluded for not describing adverse events specifically in women |                                |      |                                                                                                                                                                                                                                                     |
|--------------------------------------------------------------------------|--------------------------------|------|-----------------------------------------------------------------------------------------------------------------------------------------------------------------------------------------------------------------------------------------------------|
| Amount                                                                   | First author or research group | Year | Title                                                                                                                                                                                                                                               |
| 71                                                                       | NR                             | 1999 | A Phase III Study to Evaluate the Safety, Tolerance, and Efficacy of Early Treatment With Zidovudine (AZT) in Asymptomatic Infants With HIV Infection                                                                                               |
| 72                                                                       | NR                             | 1999 | A Randomized, Double-Blind, Four-Arm Study Comparing Combination Nucleoside, Alternating Nucleoside, and Triple-Drug Therapy for the Treatment of Advanced HIV Disease (CD4 <= 50/mm3)                                                              |
| 73                                                                       | NR                             | 1999 | A Comparison of Zidovudine (AZT) and Stavudine in HIV-Infected Patients                                                                                                                                                                             |
| 74                                                                       | NR                             | 1999 | A Study of Several Anti-HIV Drug Combinations in HIV-Infected Patients Who Have Used Indinavir                                                                                                                                                      |
| 75                                                                       | NR                             | 1999 | A Randomized Trial of the Efficacy and Safety of a Strategy of Starting With Nelfinavir Versus Ritonavir Added to Background Antiretroviral (AR) Nucleoside Therapy in HIV-Infected Individuals With CD4+ Cell Counts Less Than or Equal to 200/mm3 |
| 76                                                                       | NR                             | 1999 | A Study of Three Different Anti-HIV Drug Combinations in HIV-Infected Patients                                                                                                                                                                      |
| 77                                                                       | NR                             | 1999 | The Effectiveness of Nelfinavir and Efavirenz, Used Alone or Together, Combined With Other Anti-HIV Drugs in Patients Who Have Taken Anti-HIV Drugs                                                                                                 |
| 78                                                                       | NR                             | 1999 | ABT-378/Ritonavir in Combination With Reverse Transcriptase Inhibitors in Antiretroviral Naïve HIV-Infected Subjects                                                                                                                                |
| 79                                                                       | NR                             | 1999 | A Study to Compare Three Doses of T-20 When Given in Combination With Abacavir, Amprenavir, Ritonavir, and Efavirenz to HIV-Infected Adults                                                                                                         |
| 80                                                                       | NR                             | 1999 | A Study of Azidothymidine in HIV-Infected Children                                                                                                                                                                                                  |
| 81                                                                       | NR                             | 1999 | Safety and Effectiveness of Giving Combinations of Three or Four Anti-HIV Drugs to HIV-Infected Patients                                                                                                                                            |
| 82                                                                       | NR                             | 1999 | The Safety and Effectiveness of Retrovir Plus HIVID Combined With Either Nevirapine or Invirase in the Treatment of HIV Infection                                                                                                                   |
| 83                                                                       | NR                             | 1999 | A Randomized Comparative Trial of Zidovudine (AZT) Versus 2',3'-Dideoxyinosine (ddI) Versus AZT Plus ddI in Symptomatic HIV-Infected Children                                                                                                       |
| 84                                                                       | NR                             | 1999 | A Phase II Efficacy Study Comparing 2',3'-Dideoxyinosine (ddI) (BMV-40900) and Zidovudine Therapy of Patients With HIV Infection Who Have Been on Long Term Zidovudine Treatment                                                                    |
| 85                                                                       | NR                             | 1999 | Comparison of ddI Versus Zidovudine in HIV-Infected Patients                                                                                                                                                                                        |
| 86                                                                       | NR                             | 1999 | A Randomized Trial to Evaluate the Safety and Efficacy of Combination Therapy With Retrovir ( AZT ) and HIVID ( ddC ) Versus Retrovir, HIVID, and Wellferon ( Interferon Alfa-n1 ) for the Treatment of HIV Infection                               |
| 87                                                                       | NR                             | 1999 | A Study of the Safety and Effectiveness of Different Doses of 1592U89 in HIV-Infected Patients                                                                                                                                                      |
| 88                                                                       | NR                             | 1999 | The Safety and Effects of 1592U89 Used Alone or in Combination With Other Anti-HIV Drugs in HIV-Infected Infants and Children                                                                                                                       |
| 89                                                                       | NR                             | 1999 | A Phase I/II, Open Label Study to Evaluate the Antiviral Potential of Combination Zidovudine and 2' 3'-Dideoxyinosine (Didanosine) in Patients With Asymptomatic HIV Disease                                                                        |
| 90                                                                       | NR                             | 1999 | Safety and Effectiveness of Combining Hydroxyurea (HU) With Didanosine (ddI) and Stavudine (d4T) for Treatment of HIV-Infected Adults                                                                                                               |

**Table S4 – List of excluded studies by exclusion reason (continuation)**

| Studies excluded for not describing adverse events specifically in women |                                |      |                                                                                                                                                                                                                                               |
|--------------------------------------------------------------------------|--------------------------------|------|-----------------------------------------------------------------------------------------------------------------------------------------------------------------------------------------------------------------------------------------------|
| Amount                                                                   | First author or research group | Year | Title                                                                                                                                                                                                                                         |
| 91                                                                       | NR                             | 1999 | A Randomized, Double Blind, Comparative Study of Dideoxycytidine (ddC) Alone or ddC/AZT Combination Versus Zidovudine (ZDV) Alone in Patients With HIV Infection Who Have Received Prior ZDV Therapy                                          |
| 92                                                                       | NR                             | 1999 | Safety and Efficacy of Zidovudine for Asymptomatic HIV-Infected Individuals                                                                                                                                                                   |
| 93                                                                       | NR                             | 1999 | The Safety and Effectiveness of Nevirapine Plus Lamivudine Plus Other Anti-HIV Drugs                                                                                                                                                          |
| 94                                                                       | NR                             | 1999 | A Randomized Phase II Efficacy, Activity and Safety Study of GLQ223 Alone and in Combination With Zidovudine in Symptomatic HIV-Infected Patients Without Prior Treatment With GLQ223 or Trichosanthin                                        |
| 95                                                                       | NR                             | 1999 | A Study of Stavudine in HIV-Infected Patients Who Have Not Had Success With Other Anti-HIV Drugs                                                                                                                                              |
| 96                                                                       | NR                             | 1999 | Dideoxycytidine ( Ro 24-2027 ) A Randomized, Open-Label, Comparative Study of Dideoxycytidine ( ddC ) Versus Zidovudine ( AZT ) in Patients With AIDS or Advanced ARC Who Have Received Long-Term AZT Therapy                                 |
| 97                                                                       | NR                             | 1999 | Safety and Effectiveness of Giving Adefovir (Preveon) Plus Other Anti-HIV Drugs to HIV-Infected Patients Who Have Not Responded to Other Anti-HIV Drug Combinations                                                                           |
| 98                                                                       | NR                             | 1999 | (Ro 24-2027) A Randomized, Double-Blind, Comparative Study of Dideoxycytidine (ddC) Versus Zidovudine (AZT) in Patients With AIDS or Advanced ARC                                                                                             |
| 99                                                                       | NR                             | 1999 | A Pilot, Open-Label, Phase II, Randomized Study to Determine the Effects of Viracept on the Outcome of Cutaneous and Mucosal KS in AIDS Patients With CD4 <= 500 Cells/mm3                                                                    |
| 100                                                                      | NR                             | 1999 | Double-Blind Comparison of the Efficacy of Continued Zidovudine Versus 2',3'-Dideoxyinosine (ddI) (BMV-40900) for the Treatment of Patients With AIDS or AIDS-Related Complex and Increasing Symptomatology Despite Treatment With Zidovudine |
| 101                                                                      | NR                             | 1999 | The Safety and Effectiveness of Zidovudine in the Treatment of Patients With Early AIDS Related Complex                                                                                                                                       |
| 102                                                                      | NR                             | 1999 | The Antiviral Efficacy of Concurrent Zidovudine and 2',3'-Dideoxyinosine or 2',3'-Dideoxycytidine in Patients With Human Immunodeficiency Virus Disease                                                                                       |
| 103                                                                      | NR                             | 1999 | A Phase III, Randomized, Double-Blind, Multicentre Study to Evaluate the Safety and Efficacy of 1592U89 in Patients With AIDS Dementia Complex                                                                                                |
| 104                                                                      | Carr                           | 2000 | A randomised, open-label comparison of three highly active antiretroviral therapy regimens including two nucleoside analogues and indinavir for previously untreated HIV-1 infection: the OzCombo1 study                                      |
| 105                                                                      | Eron                           | 2000 | Efficacy, safety, and adherence with a twice-daily combination lamivudine/zidovudine tablet formulation, plus a protease inhibitor, in HIV infection                                                                                          |
| 106                                                                      | Eron                           | 2000 | A comparison of stavudine, didanosine and indinavir with zidovudine, lamivudine and indinavir for the initial treatment of HIV-1 infected individuals: selection of thymidine analog regimen therapy (START II)                               |
| 107                                                                      | Florida                        | 2000 | A randomized trial comparing the introduction of ritonavir or indinavir in 1251 nucleoside-experienced patients with advanced HIV infection                                                                                                   |
| 108                                                                      | Goodgame                       | 2000 | Amprenavir in combination with lamivudine and zidovudine versus lamivudine and zidovudine alone in HIV-1-infected antiretroviral-naive adults. Amprenavir PROAB3001 International Study Team                                                  |

**Table S4 – List of excluded studies by exclusion reason (continuation)**

| Studies excluded for not describing adverse events specifically in women |                                |      |                                                                                                                                                                                                                                                                                                 |
|--------------------------------------------------------------------------|--------------------------------|------|-------------------------------------------------------------------------------------------------------------------------------------------------------------------------------------------------------------------------------------------------------------------------------------------------|
| Amount                                                                   | First author or research group | Year | Title                                                                                                                                                                                                                                                                                           |
| 109                                                                      | Haas                           | 2000 | Comparative studies of two-times-daily versus three-times-daily indinavir in combination with zidovudine and lamivudine                                                                                                                                                                         |
| 110                                                                      | Katzenstein                    | 2000 | Virologic and CD4+ cell responses to new nucleoside regimens: switching to stavudine or adding lamivudine after prolonged zidovudine treatment of human immunodeficiency virus infection. ACTG 302 Study Team. AIDS Clinical Trials Group                                                       |
| 111                                                                      | Moyle                          | 2000 | The SPICE study: 48-week activity of combinations of saquinavir soft gelatin and nelfinavir with and without nucleoside analogues. Study of Protease Inhibitor Combinations in Europe                                                                                                           |
| 112                                                                      | Opravil                        | 2000 | Effects of early antiretroviral treatment on HIV-1 RNA in blood and lymphoid tissue: a randomized trial of double versus triple therapy                                                                                                                                                         |
| 113                                                                      | Roca                           | 2000 | A randomized, comparative study of lamivudine plus stavudine, with indinavir or nelfinavir, in treatment-experienced HIV-infected patients                                                                                                                                                      |
| 114                                                                      | Squires                        | 2000 | A comparison of stavudine plus lamivudine versus zidovudine plus lamivudine in combination with indinavir in antiretroviral naive individuals with HIV infection: selection of thymidine analog regimen therapy (START I)                                                                       |
| 115                                                                      | Wiznia                         | 2000 | Combination nucleoside analog reverse transcriptase inhibitor(s) plus nevirapine, nelfinavir, or ritonavir in stable antiretroviral therapy-experienced HIV-infected children: week 24 results of a randomized controlled trial--PACTG 377. Pediatric AIDS Clinical Trials Group 377 Study Team |
| 116                                                                      | NR                             | 2000 | A randomised phase II trial to compare the toxicity, tolerability and activity of 2-drug combinations of the nucleoside analogue reverse transcriptase inhibitors (NRTIs) lamivudine ((-)-2'-deoxy-3'thiacytidine, 3tc), zidovudine (ZDV) and 1592U89                                           |
| 117                                                                      | NR                             | 2000 | An open randomised trial to evaluate the activity and tolerability of combinations of reverse transcriptase and protease inhibitors, including induction therapy, in individuals with Human Immunodeficiency Virus-1 (HIV-1) infection and CD4 cell counts grea                                 |
| 118                                                                      | NR                             | 2000 | The Safety and Effectiveness of Indinavir Plus Ritonavir Plus Two NRTIs in HIV-Infected Patients Who Need Early Intervention Treatment                                                                                                                                                          |
| 119                                                                      | NR                             | 2000 | The Safety and Effectiveness of (+)-Calanolide A in HIV-Infected Patients Who Have Never Taken Anti-HIV Drugs                                                                                                                                                                                   |
| 120                                                                      | NR                             | 2000 | Effectiveness and Safety of Efavir/Ziagen/Zerit (3TC/ABC/d4T) Versus Efavir/Ziagen/Sustiva (3TC/ABC/EFV) Versus Efavir/Ziagen/Agenerase/Norvir (3TC/ABC/APV/RTV) in HIV Patients Who Have Never Received Treatment                                                                              |
| 121                                                                      | NR                             | 2000 | Effectiveness and Safety of Two Forms of Stavudine in HIV-Infected Patients                                                                                                                                                                                                                     |
| 122                                                                      | NR                             | 2000 | A Comparison of Three Anti-HIV Drug Combinations in HIV-Infected Patients                                                                                                                                                                                                                       |
| 123                                                                      | NR                             | 2000 | Safety and Effectiveness of 3 Anti-HIV Treatments in Patients Who Have Failed Previous Treatments Containing Nelfinavir                                                                                                                                                                         |
| 124                                                                      | NR                             | 2000 | Safety and Effectiveness of Lamivudine When Given Once a Day Versus Twice a Day in Combination With Other Anti-HIV Drugs in HIV-Infected Adults Who Have Never Received Anti-HIV Drugs                                                                                                          |
| 125                                                                      | NR                             | 2000 | Safety and Effectiveness of a Combination Anti-HIV Drug Treatment                                                                                                                                                                                                                               |
| 126                                                                      | NR                             | 2000 | Safety and Effectiveness of a New Anti-HIV Drug (AG1549) in Combination With Other Anti-HIV Drugs in HIV-Infected Patients                                                                                                                                                                      |
| 127                                                                      | NR                             | 2000 | Safety and Tolerance of Indinavir Plus Ritonavir in HIV-Positive Patients Failing Therapy With Amprenavir, Nelfinavir, or Saquinavir                                                                                                                                                            |

**Table S4 – List of excluded studies by exclusion reason (continuation)**

| Studies excluded for not describing adverse events specifically in women |                                |      |                                                                                                                                                                                                               |
|--------------------------------------------------------------------------|--------------------------------|------|---------------------------------------------------------------------------------------------------------------------------------------------------------------------------------------------------------------|
| Amount                                                                   | First author or research group | Year | Title                                                                                                                                                                                                         |
| 128                                                                      | NR                             | 2000 | A Comparison of Emtricitabine and Stavudine Used With Didanosine Plus Efavirenz in HIV-Infected Patients Who Have Not Taken Anti-HIV Drugs                                                                    |
| 129                                                                      | Clumeck                        | 2001 | Simplification with abacavir-based triple nucleoside therapy versus continued protease inhibitor-based highly active antiretroviral therapy in HIV-1-infected patients with undetectable plasma HIV-1 RNA     |
| 130                                                                      | Florence                       | 2001 | Ritonavir/saquinavir plus one nucleoside reverse transcriptase inhibitor (NRTI) versus indinavir plus two NRTIs in protease inhibitor-naive HIV-1-infected adults (IRIS study)                                |
| 131                                                                      | Gartland                       | 2001 | AVANTI 3: a randomized, double-blind trial to compare the efficacy and safety of lamivudine plus zidovudine versus lamivudine plus zidovudine plus nelfinavir in HIV-1-infected antiretroviral-naive patients |
| 132                                                                      | Albrecht                       | 2001 | Nelfinavir, efavirenz, or both after the failure of nucleoside treatment of HIV infection                                                                                                                     |
| 133                                                                      | Jensen-Fangel                  | 2001 | The effect of nevirapine in combination with nelfinavir in heavily pretreated HIV-1-infected patients: a prospective, open-label, controlled, randomized study                                                |
| 134                                                                      | Smeaton                        | 2001 | ACTG (AIDS Clinical Trials Group) 384: a strategy trial comparing consecutive treatments for HIV-1                                                                                                            |
| 135                                                                      | Staszewski                     | 2001 | Abacavir-lamivudine-zidovudine vs indinavir-lamivudine-zidovudine in antiretroviral-naive HIV-infected adults: A randomized equivalence trial                                                                 |
| 136                                                                      | Ungsedhapand                   | 2001 | A randomized, open-label, comparative trial of zidovudine plus lamivudine versus zidovudine plus lamivudine plus didanosine in antiretroviral-naive HIV-1-infected Thai patients                              |
| 137                                                                      | Katlama                        | 2001 | Intensification of stable background therapy with abacavir in antiretroviral therapy experienced patients: 48-week data from a randomized, double-blind trial                                                 |
| 138                                                                      | Michelet                       | 2001 | Ritonavir-saquinavir dual protease inhibitor compared to ritonavir alone in human immunodeficiency virus-infected patients                                                                                    |
| 139                                                                      | McMahon                        | 2001 | Antiretroviral activity and safety of abacavir in combination with selected HIV-1 protease inhibitors in therapy-naive HIV-1-infected adults                                                                  |
| 140                                                                      | NR                             | 2001 | A Comparison of BMS-232632 With Efavirenz, Each in Combination With Zidovudine-Lamivudine                                                                                                                     |
| 141                                                                      | NR                             | 2001 | Safety and Tolerability of Z-100 in Patients With Early HIV Infection                                                                                                                                         |
| 142                                                                      | NR                             | 2001 | Comparison of Two Dosing Regimens of GW433908/Ritonavir Versus Lopinavir/Ritonavir for 48 Weeks in HIV Patients Who Have Taken Protease Inhibitors and Experienced Virological Failure                        |
| 143                                                                      | NR                             | 2001 | A Comparison of Atazanavir and Nelfinavir, Each in Combination With 2 NRTIs, in Patients Who Have Failed Treatments Without a Protease Inhibitor                                                              |
| 144                                                                      | NR                             | 2001 | Comparison of GW433908/Ritonavir to Nelfinavir When Used With Abacavir and Lamivudine in Patients That Have Not Taken Antiretroviral Drugs                                                                    |
| 145                                                                      | NR                             | 2001 | Comparing Side Effects of Two Forms of Videx in HIV-Infected Adults                                                                                                                                           |
| 146                                                                      | NR                             | 2001 | T-20 in HIV Patients With Prior Drug Treatment and/or Resistance to Each of the Three Classes of Anti-HIV Drugs                                                                                               |
| 147                                                                      | NR                             | 2001 | Comparison of GW433908 and Nelfinavir in HIV Patients Who Have Not Had Antiretroviral Therapy                                                                                                                 |
| 148                                                                      | NR                             | 2001 | Safety and Effectiveness of TRIZIVIR (Abacavir/Lamivudine/Zidovudine) With Efavirenz in HIV-Infected Patients Who Have Never Taken Anti-HIV Drugs                                                             |



**Table S4 – List of excluded studies by exclusion reason (continuation)**

| Studies excluded for not describing adverse events specifically in women |                                |      |                                                                                                                                                                                                                                                                   |
|--------------------------------------------------------------------------|--------------------------------|------|-------------------------------------------------------------------------------------------------------------------------------------------------------------------------------------------------------------------------------------------------------------------|
| Amount                                                                   | First author or research group | Year | Title                                                                                                                                                                                                                                                             |
| 149                                                                      | NR                             | 2001 | Atazanavir Versus Lopinavir/Ritonavir (LPV/RTV) in Patients Who Have Not Had Success With Protease Inhibitor-Containing HAART Regimen(s)                                                                                                                          |
| 150                                                                      | NR                             | 2001 | Simplified Drug Regimens for HIV Patients in ACTG 388 or Patients Who Responded to A First Potent Combination Regimen                                                                                                                                             |
| 151                                                                      | Podzamczer                     | 2002 | A randomized clinical trial comparing nelfinavir or nevirapine associated to zidovudine/lamivudine in HIV-infected naive patients (the Combine Study)                                                                                                             |
| 152                                                                      | Gathe                          | 2002 | Antiviral activity of enteric-coated didanosine, stavudine, and nelfinavir versus zidovudine plus lamivudine and nelfinavir                                                                                                                                       |
| 153                                                                      | Carr                           | 2002 | Abacavir substitution for nucleoside analogs in patients with HIV lipoatrophy: a randomized trial                                                                                                                                                                 |
| 154                                                                      | Walmsley                       | 2002 | Lopinavir-ritonavir versus nelfinavir for the initial treatment of HIV infection                                                                                                                                                                                  |
| 155                                                                      | Joly                           | 2002 | Efficacy of zidovudine compared to stavudine, both in combination with lamivudine and indinavir, in human immunodeficiency virus-infected nucleoside-experienced patients with no prior exposure to lamivudine, stavudine, or protease inhibitors (novavir trial) |
| 156                                                                      | Opravil                        | 2002 | A randomized trial of simplified maintenance therapy with abacavir, lamivudine, and zidovudine in human immunodeficiency virus infection                                                                                                                          |
| 157                                                                      | Sension                        | 2002 | Lamivudine 300 mg QD versus continued lamivudine 150 mg BID with stavudine and a protease inhibitor in suppressed patients                                                                                                                                        |
| 158                                                                      | NR                             | 2002 | Efficacy and Safety of Tenofovir DF/Atazanavir Enhanced With Low Dose of Ritonavir in HIV-Infected Patients                                                                                                                                                       |
| 159                                                                      | NR                             | 2002 | A Study Comparing 4 Doses Of GW810781 Versus Placebo In HIV-Infected Patients                                                                                                                                                                                     |
| 160                                                                      | NR                             | 2002 | Safety and Antiviral Study of ACH-126, 443 (Beta-L-Fd4C) in the Treatment of Adults With HIV Infection and Modestly Detectable Viral Load                                                                                                                         |
| 161                                                                      | NR                             | 2002 | Lopinavir/Ritonavir in Combination With Saquinavir Mesylate or Lamivudine/Zidovudine to Explore Metabolic Toxicities in Antiretroviral HIV-Infected Subjects                                                                                                      |
| 162                                                                      | NR                             | 2002 | Study to Explore Safety And Tolerability of Fosamprenavir With or Without Ritonavir in Combination With TRIZIVIR or COMBIVIR                                                                                                                                      |
| 163                                                                      | NR                             | 2002 | Study of Lopinavir, Ritonavir, Tenofovir and Emtricitabine in HIV-Infected Antiretroviral Naïve Subjects                                                                                                                                                          |
| 164                                                                      | NR                             | 2002 | A Dose Escalation Study of Tenofovir Alafenamide in Treatment-Naive Patients                                                                                                                                                                                      |
| 165                                                                      | NR                             | 2002 | Comparing the Safety, Effectiveness, and Tolerability of Three Anti-HIV Drug Regimens for Treatment-Naive Patients                                                                                                                                                |
| 166                                                                      | NR                             | 2002 | CSP #512 - Options in Management With Anti-Retrovirals                                                                                                                                                                                                            |
| 167                                                                      | NR                             | 2002 | A HIV Study Of A Fixed-Dose Combination Tablet In Antiretroviral Experienced Patients                                                                                                                                                                             |
| 168                                                                      | Dragsted                       | 2003 | Randomized trial to evaluate indinavir/ritonavir versus saquinavir/ritonavir in human immunodeficiency virus type 1-infected patients: the MaxCmin1 Trial                                                                                                         |
| 169                                                                      | Fischl                         | 2003 | Twice-daily Trizivir versus Combivir-abacavir in antiretroviral-experienced adults with human immunodeficiency virus-1 infection: a formulation-switch trial                                                                                                      |
| 170                                                                      | Fischl                         | 2003 | A randomized trial of 2 different 4-drug antiretroviral regimens versus a 3-drug regimen, in advanced human immunodeficiency virus disease                                                                                                                        |
| 171                                                                      | Arnaiz                         | 2003 | Continued indinavir versus switching to indinavir/ritonavir in HIV-infected patients with suppressed viral load                                                                                                                                                   |

**Table S4 – List of excluded studies by exclusion reason (continuation)**

| Studies excluded for not describing adverse events specifically in women |                                |      |                                                                                                                                                                                                                                  |
|--------------------------------------------------------------------------|--------------------------------|------|----------------------------------------------------------------------------------------------------------------------------------------------------------------------------------------------------------------------------------|
| Amount                                                                   | First author or research group | Year | Title                                                                                                                                                                                                                            |
| 172                                                                      | Squires                        | 2003 | Tenofovir disoproxil fumarate in nucleoside-resistant HIV-1 infection: a randomized trial                                                                                                                                        |
| 173                                                                      | Matheron                       | 2003 | Triple nucleoside combination zidovudine/lamivudine/abacavir versus zidovudine/lamivudine/nelfinavir as first-line therapy in HIV-1-infected adults: a randomized trial                                                          |
| 174                                                                      | Moyle                          | 2003 | A 48-week, randomized, open-label comparison of three abacavir-based substitution approaches in the management of dyslipidemia and peripheral lipoatrophy                                                                        |
| 175                                                                      | Sáez-Llorens                   | 2003 | Forty-eight-week evaluation of lopinavir/ritonavir, a new protease inhibitor, in human immunodeficiency virus-infected children                                                                                                  |
| 176                                                                      | Katlama                        | 2003 | TRIZAL study: switching from successful HAART to Trizivir (abacavir-lamivudine-zidovudine combination tablet): 48 weeks efficacy, safety and adherence results                                                                   |
| 177                                                                      | Lalezari                       | 2003 | Enfuvirtide, an HIV-1 fusion inhibitor, for drug-resistant HIV infection in North and South America                                                                                                                              |
| 178                                                                      | Lazzarin                       | 2003 | Efficacy of enfuvirtide in patients infected with drug-resistant HIV-1 in Europe and Australia                                                                                                                                   |
| 179                                                                      | Maggiolo                       | 2003 | Outcome of 2 simplification strategies for the treatment of human immunodeficiency virus type 1 infection                                                                                                                        |
| 180                                                                      | Martínez                       | 2003 | Substitution of nevirapine, efavirenz, or abacavir for protease inhibitors in patients with human immunodeficiency virus infection                                                                                               |
| 181                                                                      | NR                             | 2003 | TMC114-C202: a Study of Safety, Efficacy, and Tolerability of TMC114 and Low Dose Ritonavir in HIV-1 Infected Patients                                                                                                           |
| 182                                                                      | NR                             | 2003 | Safety and Efficacy of BAY 50-4798 in Patients With HIV Infection                                                                                                                                                                |
| 183                                                                      | NR                             | 2003 | Randomized Evaluation of Strategic Intervention in Multidrug Resistant Patients With Tipranavir (RESIST)                                                                                                                         |
| 184                                                                      | DeJesus                        | 2004 | Abacavir versus zidovudine combined with lamivudine and efavirenz, for the treatment of antiretroviral-naive HIV-infected adults                                                                                                 |
| 185                                                                      | DeJesus                        | 2004 | Once-daily versus twice-daily lamivudine, in combination with zidovudine and efavirenz, for the treatment of antiretroviral-naive adults with HIV infection: a randomized equivalence trial                                      |
| 186                                                                      | Eron                           | 2004 | Once-daily versus twice-daily lopinavir/ritonavir in antiretroviral-naive HIV-positive patients: a 48-week randomized clinical trial                                                                                             |
| 187                                                                      | Gallant                        | 2004 | Efficacy and safety of tenofovir DF vs stavudine in combination therapy in antiretroviral-naive patients: a 3-year randomized trial                                                                                              |
| 188                                                                      | Gulick                         | 2004 | Triple-nucleoside regimens versus efavirenz-containing regimens for the initial treatment of HIV-1 infection                                                                                                                     |
| 189                                                                      | Benson                         | 2004 | A randomized study of emtricitabine and lamivudine in stably suppressed patients with HIV                                                                                                                                        |
| 190                                                                      | Gathe                          | 2004 | SOLO: 48-week efficacy and safety comparison of once-daily fosamprenavir /ritonavir versus twice-daily nelfinavir in naive HIV-1-infected patients                                                                               |
| 191                                                                      | Vibhagool                      | 2004 | Triple nucleoside treatment with abacavir plus the lamivudine/zidovudine combination tablet (COM) compared to indinavir/COM in antiretroviral therapy-naïve adults: results of a 48-week open-label, equivalence trial (CNA3014) |
| 192                                                                      | Perez                          | 2004 | A randomized clinical trial comparing nelfinavir and ritonavir in patients with advanced HIV disease (CPCRA 042/CTN 102)                                                                                                         |
| 193                                                                      | Rodriguez-French               | 2004 | The NEAT study: a 48-week open-label study to compare the antiviral efficacy and safety of GW433908 versus nelfinavir in antiretroviral therapy-naive HIV-1-infected patients                                                    |
| 194                                                                      | Saag                           | 2004 | Efficacy and safety of emtricitabine vs stavudine in combination therapy in antiretroviral-naive patients: a randomized trial                                                                                                    |

**Table S4 – List of excluded studies by exclusion reason (continuation)**

| Studies excluded for not describing adverse events specifically in women |                                |      |                                                                                                                                                                                                                                                                |
|--------------------------------------------------------------------------|--------------------------------|------|----------------------------------------------------------------------------------------------------------------------------------------------------------------------------------------------------------------------------------------------------------------|
| Amount                                                                   | First author or research group | Year | Title                                                                                                                                                                                                                                                          |
| 195                                                                      | Gaytan                         | 2004 | Nevirapina o efavirenz en combinación com dos análogos de nucleósidos em pacientes com infección por el VIH sin tratamiento previo                                                                                                                             |
| 196                                                                      | NR                             | 2004 | Phase IV-III, open-label, randomized, comparative study, to evaluate the safety and efficacy of the nucleoside supression of a triple therapy based on lopinavir-ritonavir vs. continuous triple therapy on patients infected by HIV that have maintained unde |
| 197                                                                      | NR                             | 2004 | A Phase III, Randomized, Controlled, Open-label, Multicentre, Three Arm Study to Compare the Efficacy and Safety of a Dual-boosted HIV-1 Protease Inhibitor (PI) regimen of Fosamprenavir (FPV)/ Lopinavir (LPV)/Ritonavir (RTV)/1400mg/533mg/133mg Twice Dail |
| 198                                                                      | NR                             | 2004 | Monotherapy Versus Placebo Over 7 Days-Non-Nucleoside Reverse Transcriptase Inhibitor-Experienced HIV1 Infected Adults                                                                                                                                         |
| 199                                                                      | NR                             | 2004 | GW873140 to Treat HIV-1 Infected Adults                                                                                                                                                                                                                        |
| 200                                                                      | NR                             | 2004 | TNX-355 With Optimized Background Therapy (OBT) in Treatment-Experienced Subjects With HIV-1                                                                                                                                                                   |
| 201                                                                      | NR                             | 2004 | Safety of Saquinavir and High Doses of Lopinavir/Ritonavir in Children With HIV                                                                                                                                                                                |
| 202                                                                      | NR                             | 2004 | A Study Comparing Safety Of Abacavir And Lamivudine Administered Once-Daily As A Single Tablet Versus The Same Drugs Administered Twice-Daily As Separate Tablets (ALOHA Study)                                                                                |
| 203                                                                      | NR                             | 2004 | Safety and Effectiveness of the Oral HIV Entry Inhibitor Vicriviroc in HIV Infected Patients                                                                                                                                                                   |
| 204                                                                      | NR                             | 2004 | NNRTI vs PI Regimens for HIV Infected Women After They Have Taken Nevirapine to Prevent Mother-To-Child HIV Transmission                                                                                                                                       |
| 205                                                                      | NR                             | 2004 | Pharmacokinetics and Safety Study of Tipranavir in Combination With Low Dose Ritonavir in Human Immunodeficiency Virus (HIV)-Infected Children                                                                                                                 |
| 206                                                                      | NR                             | 2004 | Trial of Maraviroc (UK-427,857) in Combination With Optimized Background Therapy Versus Optimized Background Therapy Alone for the Treatment of HIV-1 Infected Subjects                                                                                        |
| 207                                                                      | NR                             | 2004 | Trial of Maraviroc (UK-427,857) in Combination With Optimized Background Therapy Versus Optimized Background Therapy Alone for the Treatment of Antiretroviral-Experienced NonCCR5-Tropic HIV-1 Infected Subjects                                              |
| 208                                                                      | NR                             | 2004 | Trial of Maraviroc (UK-427,857) in Combination With Zidovudine/Lamivudine Versus Efavirenz in Combination With Zidovudine/Lamivudine                                                                                                                           |
| 209                                                                      | NR                             | 2004 | A Study Comparing The Safety, Tolerability and Efficacy of Trizivir VS Combivir & Atazanavir In Subjects With HIV                                                                                                                                              |
| 210                                                                      | NR                             | 2004 | Fosamprenavir Versus Other Protease Inhibitors                                                                                                                                                                                                                 |
| 211                                                                      | NR                             | 2004 | KALETRA Or LEXIVA With Ritonavir Combined With EPIVIR And Abacavir In Naive Subjects Over 48 Weeks                                                                                                                                                             |
| 212                                                                      | NR                             | 2004 | A Study to Evaluate the Safety and Efficacy of an Investigational Drug in HIV Infected Patients (0518-004)(COMPLETED)                                                                                                                                          |
| 213                                                                      | Dragsted                       | 2005 | A randomized trial to evaluate lopinavir/ritonavir versus saquinavir/ritonavir in HIV-1-infected patients: the MaxCmin2 trial                                                                                                                                  |
| 214                                                                      | Cohen                          | 2005 | Comparison of atazanavir with lopinavir/ritonavir in patients with prior protease inhibitor failure: a randomized multinational trial                                                                                                                          |
| 215                                                                      | Arribas                        | 2005 | Lopinavir/ritonavir as single-drug therapy for maintenance of HIV-1 viral suppression: 48-week results of a randomized, controlled, open-label, proof-of-concept pilot clinical trial (OK Study)                                                               |

**Table S4 – List of excluded studies by exclusion reason (continuation)**

| Studies excluded for not describing adverse events specifically in women |                                |      |                                                                                                                                                                                                                                                                |
|--------------------------------------------------------------------------|--------------------------------|------|----------------------------------------------------------------------------------------------------------------------------------------------------------------------------------------------------------------------------------------------------------------|
| Amount                                                                   | First author or research group | Year | Title                                                                                                                                                                                                                                                          |
| 216                                                                      | Bonjoch                        | 2005 | Antiretroviral treatment simplification with 3 NRTIs or 2 NRTIs plus nevirapine in HIV-1-infected patients treated with successful first-line HAART                                                                                                            |
| 217                                                                      | Markowitz                      | 2005 | Induction with abacavir/lamivudine/zidovudine plus efavirenz for 48 weeks followed by 48-week maintenance with abacavir/lamivudine/zidovudine alone in antiretroviral-naïve HIV-1-infected patients                                                            |
| 218                                                                      | Negredo                        | 2005 | Lopinavir/ritonavir plus nevirapine as a nucleoside-sparing approach in antiretroviral-experienced patients (NEKA study)                                                                                                                                       |
| 219                                                                      | Izzedine                       | 2005 | Long-term renal safety of tenofovir disoproxil fumarate in antiretroviral-naïve HIV-1-infected patients. Data from a double-blind randomized active-controlled multicentre study                                                                               |
| 220                                                                      | Justesen                       | 2005 | The long-term pharmacokinetics and safety of adding low-dose ritonavir to a nelfinavir 1,250 mg twice-daily regimen in HIV-infected patients                                                                                                                   |
| 221                                                                      | Keiser                         | 2005 | Substituting abacavir for hyperlipidemia-associated protease inhibitors in HAART regimens improves fasting lipid profiles, maintains virologic suppression, and simplifies treatment                                                                           |
| 222                                                                      | NR                             | 2005 | ASK-500                                                                                                                                                                                                                                                        |
| 223                                                                      | NR                             | 2005 | The STEAL Study                                                                                                                                                                                                                                                |
| 224                                                                      | NR                             | 2005 | A Phase III, randomised, double-blind, placebo-controlled, multicentre, parallel group study to compare the efficacy and safety of GW873140 400mg BID in combination with a ritonavir-containing optimised background therapy (OBT) regimen versus placebo plu |
| 225                                                                      | NR                             | 2005 | Large, Simple Trial Comparing Two Strategies for Management of Anti-Retroviral Therapy (The SMART Study) - SMART                                                                                                                                               |
| 226                                                                      | NR                             | 2005 | A Phase IIb randomized, partially blinded, dose-finding trial of TMC278 in antiretroviral naïve HIV-1 infected subjects. - N/A                                                                                                                                 |
| 227                                                                      | NR                             | 2005 | Randomized, double-blind, placebo-controlled 7 day monotherapy Phase IIa study to evaluate the antiviral activity and safety of oral administered RTV-boosted BILR 355 (75 mg and 150 mg twice daily) in HIV-1-infected, NNRTI-experienced patients, followed  |
| 228                                                                      | NR                             | 2005 | A Phase IV, Open-Label, Randomized, Multicenter Trial Assessing the Efficacy of a Treatment Maintenance Phase with Unboosted vs. Boosted Reyataz After an Induction Phase with Reyataz and Ritonavir in Treatment Naïve HIV Patients Revised Protocol 03 Incor |
| 229                                                                      | NR                             | 2005 | A Phase 3, Randomized, Open-label, Study of Lopinavir/ritonavir Tablets Versus Soft Gel Capsules and Once Daily Versus Twice Daily Administration, when Coadministered with NRTIs in Antiretroviral Naïve HIV-1 Infected Subjects                              |
| 230                                                                      | NR                             | 2005 | Ensayo randomizado para determinar el tratamiento óptimo de pacientes con infección por VIH en quienes la terapia con TARGA de primera y segunda línea ha fracasado - Options in management with antiretrovirals                                               |
| 231                                                                      | NR                             | 2005 | ESTUDIO DE LOS CAMBIOS EN EL RECUENTO DE LINFOCITOS CD4 TRAS LA SUSTITUCIÓN DE TENOFOVIR POR ABACAVIR EN PACIENTES CON UNA PAUTA HAART QUE INCLUYA DDI + TENOFOVIR Y CON SUPRESIÓN VIRAL                                                                       |
| 232                                                                      | NR                             | 2005 | Safety and Efficacy of SCH-417690 in HIV-infected Treatment-Naïve Subjects - N/A                                                                                                                                                                               |
| 233                                                                      | NR                             | 2005 | Multicenter, Double-Blind, Randomized, Dose-Ranging, Placebo-Controlled Study to Evaluate the Safety, Pharmacokinetics, and Antiretroviral Activity of Raltegravir in Combination With an Optimized Background Therapy (OBT), Versus Optimized Background Ther |

**Table S4 – List of excluded studies by exclusion reason (continuation)**

| Studies excluded for not describing adverse events specifically in women |                                |      |                                                                                                                                                                                                                                                                |
|--------------------------------------------------------------------------|--------------------------------|------|----------------------------------------------------------------------------------------------------------------------------------------------------------------------------------------------------------------------------------------------------------------|
| Amount                                                                   | First author or research group | Year | Title                                                                                                                                                                                                                                                          |
| 234                                                                      | NR                             | 2005 | A randomized, controlled, open-label trial to compare the efficacy, safety and tolerability of TMC114/RTV versus LPV/RTV in treatment-experienced HIV-1 infected subjects                                                                                      |
| 235                                                                      | NR                             | 2005 | A Phase III, randomized, double-blind, placebo-controlled, multicenter, parallel group study to compare the efficacy and safety of GW873140 400mg BID in combination with a ritonavir-containing optimized background therapy (OBT) regimen versus placebo plu |
| 236                                                                      | NR                             | 2005 | A Randomized, Open Label Study Assessing Safety, Tolerability, and Efficacy of an Induction/Maintenance Treatment Strategy Including Lopinavir/ritonavir (LPV/r) plus Tenofovir Disoproxil Fumarate (TDF) and Emtricitabine (FTC) versus Efavirenz (EFV) plus  |
| 237                                                                      | NR                             | 2005 | An open-label trial with TMC125 in HIV-1 infected subjects, who were randomized to a TMC125 treatment arm in a sponsor-selected TMC125 trial and were treated for at least 48 weeks. - N/A                                                                     |
| 238                                                                      | NR                             | 2005 | Vicriviroc (SCH 417690) in Combination Treatment with Optimized ART Regimen in Experienced Subjects (VICTOR-E1) - VICTOR-E1                                                                                                                                    |
| 239                                                                      | NR                             | 2005 | GEMINI Study - A Study of Saquinavir/Ritonavir in Treatment-Naive Patients With HIV-1 Infection                                                                                                                                                                |
| 240                                                                      | NR                             | 2005 | Open-label randomized multicenter study of once daily antiretroviral treatment regimen comparing ritonavir boosted atazanavir to efavirenz                                                                                                                     |
| 241                                                                      | NR                             | 2005 | A Study Exploring an Induction-Maintenance Kaletra-Based Therapy Versus a Sustiva-Based Regimen in Previously Non-Treated, HIV-1/HCV Co-Infected Subjects                                                                                                      |
| 242                                                                      | NR                             | 2005 | Efficacy and Safety of Kaletra Monotherapy Compared to Kaletra Based Triple Therapy to Treat HIV in Antiretroviral Naïve Patients                                                                                                                              |
| 243                                                                      | NR                             | 2005 | GEMINI Study - A Study of Saquinavir/Ritonavir in Treatment-Naive Patients With HIV-1 Infection                                                                                                                                                                |
| 244                                                                      | NR                             | 2005 | A Study of an Oral Entry Inhibitor, SP01A, in Treatment-Experienced HIV-Infected Patients                                                                                                                                                                      |
| 245                                                                      | NR                             | 2005 | TMC114-C214: trial of TMC114 Administered With Low Dose Ritonavir (RTV) in HIV-1 Infected Treatment Experienced Patients                                                                                                                                       |
| 246                                                                      | NR                             | 2005 | A Pilot Study of Atazanavir/Ritonavir/Efavirenz as a Nucleoside Sparing Regimen                                                                                                                                                                                |
| 247                                                                      | NR                             | 2005 | Abacavir/Lamivudine Versus Emtricitabine/Tenofovir Both In Combination With Lopinavir/Ritonavir For The Treatment Of HIV                                                                                                                                       |
| 248                                                                      | NR                             | 2005 | A Randomised, Open-label Trial to Assess the Safety and Efficacy of Switching to Tenofovir-emtricitabine or Abacavir-lamivudine: the STEAL Study                                                                                                               |
| 249                                                                      | NR                             | 2005 | TMC114-C211: trial of an Investigational Protease Inhibitor TMC114 With Ritonavir (TMC114/r") in HIV-1 Infected Patients Who Have Never Been Treated With Antiretroviral Medications"                                                                          |
| 250                                                                      | NR                             | 2005 | Comparing a Nucleoside-Analogue-Sparing Regimen and a Protease-Inhibitor-Sparing Regimen in HIV Infected Patients                                                                                                                                              |
| 251                                                                      | NR                             | 2005 | Tipranavir/Ritonavir vs. Genotypically Defined Protease Inhibitor/Ritonavir in HIV Patients (RESIST-2)                                                                                                                                                         |
| 252                                                                      | NR                             | 2005 | A Randomised Trial to Evaluate the Antiviral Efficacy and Safety of Treatment With 500 mg Tipranavir (TPV) Plus 100 mg or 200 mg Ritonavir (RTV) p.o. BID in Comparison to 400 mg Lopinavir (LPV) Plus 100 mg RTV p.o. BID in Combination With Standard Backgr |
| 253                                                                      | NR                             | 2005 | Combination of Efavirenz and Truvada - COMET Study                                                                                                                                                                                                             |
| 254                                                                      | NR                             | 2005 | Salvage Therapy With Amprenavir, Lopinavir and Ritonavir in HIV-Infected Patients in Virological Failure                                                                                                                                                       |
| 255                                                                      | NR                             | 2005 | Induction-maintenance of Lopinavir/r in HIV-infected Subjects                                                                                                                                                                                                  |

**Table S4 – List of excluded studies by exclusion reason (continuation)**

| Studies excluded for not describing adverse events specifically in women |                                |      |                                                                                                                                                                                                                                                                |
|--------------------------------------------------------------------------|--------------------------------|------|----------------------------------------------------------------------------------------------------------------------------------------------------------------------------------------------------------------------------------------------------------------|
| Amount                                                                   | First author or research group | Year | Title                                                                                                                                                                                                                                                          |
| 256                                                                      | NR                             | 2005 | MEDICLAS Study (Metabolic Effects of Different Classes of Antiretrovirals)                                                                                                                                                                                     |
| 257                                                                      | NR                             | 2005 | DART II - A Phase IV Study of 3 Antiretroviral Medicines in Combination, in HIV Patients Who Have Not Been Previously Treated With Antiretroviral Therapy                                                                                                      |
| 258                                                                      | NR                             | 2005 | Lopinavir/r Monotherapy as Maintenance Therapy After Long Term Viral Suppression                                                                                                                                                                               |
| 259                                                                      | NR                             | 2005 | A Phase IIIb Study Comparing Two Boosted Protease Inhibitor-based HAART Regimens in HIV-infected Patients Experiencing Their First Virologic Failure While Receiving an NNRTI-containing HAART Regimen                                                         |
| 260                                                                      | NR                             | 2005 | Once Daily Antiretroviral Therapy in HIV Infected Adults Treated With HAART                                                                                                                                                                                    |
| 261                                                                      | NR                             | 2005 | Once Daily 3TC, Efavirenz and ddI for HIV Infection                                                                                                                                                                                                            |
| 262                                                                      | NR                             | 2005 | A 48 Week Study Comparing Treatment With Saquinavir + Lopinavir/Ritonavir in Combination With Enfuvirtide HAART Versus Saquinavir + Lopinavir/Ritonavir + Other Nucleoside Combinations to See the Efficacy of These Treatments in Patients Infected With HIV  |
| 263                                                                      | NR                             | 2005 | The Once A Day Protease Inhibitor Regimens""                                                                                                                                                                                                                   |
| 264                                                                      | NR                             | 2005 | A Comparison of Two Anti-HIV Drug Regimens for Youth Who Have Failed Prior Therapy                                                                                                                                                                             |
| 265                                                                      | NR                             | 2005 | Study Comparing Racivir and Lamivudine in Treatment-Experienced HIV Subjects                                                                                                                                                                                   |
| 266                                                                      | NR                             | 2005 | Dual Boosted Protease Inhibitor Regimens Without Any Additional Antiretroviral Therapy in HIV-1 Infected Patients (ANRS127)                                                                                                                                    |
| 267                                                                      | NR                             | 2005 | Effect of Tenofovir Disoproxil Fumarate on Lipid Levels in HIV Infected Adults on Stable Anti-HIV Drug Therapy                                                                                                                                                 |
| 268                                                                      | NR                             | 2005 | Study of Treatment of Antiretroviral-naïve, HIV-1-Infected Patients Comparing Tenofovir Disoproxil Fumarate Administered in Combination With Lamivudine and Efavirenz vs. Stavudine, Lamivudine and Efavirenz                                                  |
| 269                                                                      | NR                             | 2005 | Tenofovir Disoproxil Fumarate/Emtricitabine/Efavirenz Versus Combivir/Efavirenz in Antiretroviral-Naïve HIV-1 Infected Subjects                                                                                                                                |
| 270                                                                      | NR                             | 2005 | Once a Day (QD) - Twice a Day (BID) Clinical Trial: didanosine, Lamivudine and Efavirenz Versus Zidovudine, Lamivudine and Efavirenz in the Starting Treatment of HIV                                                                                          |
| 271                                                                      | NR                             | 2005 | Anti-HIV Drugs for Treating Infants Who Acquired HIV Infection at Birth                                                                                                                                                                                        |
| 272                                                                      | NR                             | 2005 | A Study of TMC278 in Human Immunodeficiency Virus Type 1 Infected Patients, Who Are Not Treated With Antiretroviral Medicines                                                                                                                                  |
| 273                                                                      | NR                             | 2005 | Vicriviroc, a CCR5 Inhibitor, Added to an Optimized Antiretroviral Therapy for Previously Treated HIV (VICTOR-E2) (Study P04285)(TERMINATED)                                                                                                                   |
| 274                                                                      | NR                             | 2005 | Safety and Efficacy of an Investigational Drug in Human Immunodeficiency Virus (HIV)-Infected Patients Failing Current Antiretroviral Therapies (0518-005)(COMPLETED)                                                                                          |
| 275                                                                      | NR                             | 2005 | Study of Lopinavir/Ritonavir Tablets Versus Soft Gel Capsules and Once Daily Versus Twice Daily Administration, When Coadministered With Nucleoside Reverse Transcriptase Inhibitors in Antiretroviral Naïve Human Immunodeficiency Virus Type 1 Infected Subj |
| 276                                                                      | NR                             | 2005 | Randomised open multicentre trial comparing stavudine versus abacavir, both combined with lamivudine/efavirenz, in Human Immunodeficiency Virus (HIV) infected antiretroviral naïve patients                                                                   |

**Table S4 – List of excluded studies by exclusion reason (continuation)**

| Studies excluded for not describing adverse events specifically in women |                                |      |                                                                                                                                                                                                                                                                                                             |
|--------------------------------------------------------------------------|--------------------------------|------|-------------------------------------------------------------------------------------------------------------------------------------------------------------------------------------------------------------------------------------------------------------------------------------------------------------|
| Amount                                                                   | First author or research group | Year | Title                                                                                                                                                                                                                                                                                                       |
| 277                                                                      | NR                             | 2005 | Therapeutic Drug Monitoring in HIV-Infected Children Starting a New Anti-Retroviral Regime                                                                                                                                                                                                                  |
| 278                                                                      | NR                             | 2005 | Randomised, multicentre, open clinical trial assessing the effectiveness and safety of simplification to atazanavir + ritonavir versus continuation of a stable antiretroviral regimen on lopinavir/ritonavir                                                                                               |
| 279                                                                      | Eron                           | 2006 | The KLEAN study of fosamprenavir-ritonavir versus lopinavir-ritonavir, each in combination with abacavir-lamivudine, for initial treatment of HIV infection over 48 weeks: a randomised non-inferiority trial                                                                                               |
| 280                                                                      | Gallant                        | 2006 | Tenofovir DF, emtricitabine, and efavirenz vs. zidovudine, lamivudine, and efavirenz for HIV                                                                                                                                                                                                                |
| 281                                                                      | Gathe                          | 2006 | Efficacy of the protease inhibitors tipranavir plus ritonavir in treatment-experienced patients: 24-week analysis from the RESIST-1 trial                                                                                                                                                                   |
| 282                                                                      | Martínez                       | 2006 | Clinical trial comparing efficacy and safety of four highly active antiretroviral therapy (HAART) in antiretroviral-naive treatment with advanced HIV infection                                                                                                                                             |
| 283                                                                      | Gulick                         | 2006 | Three- vs four-drug antiretroviral regimens for the initial treatment of HIV-1 infection: a randomized controlled trial                                                                                                                                                                                     |
| 284                                                                      | Markowitz                      | 2006 | Antiretroviral activity, pharmacokinetics, and tolerability of MK-0518, a novel inhibitor of HIV-1 integrase, dosed as monotherapy for 10 days in treatment-naive HIV-1-infected individuals                                                                                                                |
| 285                                                                      | Yeni                           | 2006 | Virological and immunological outcomes at 3 years after starting antiretroviral therapy with regimens containing non-nucleoside reverse transcriptase inhibitor, protease inhibitor, or both in INITIO: open-label randomised trial                                                                         |
| 286                                                                      | Jemsek                         | 2006 | Body fat and other metabolic effects of atazanavir and efavirenz, each administered in combination with zidovudine plus lamivudine, in antiretroviral-naive HIV-infected patients                                                                                                                           |
| 287                                                                      | Kumar                          | 2006 | A prospective, 96-week study of the impact of Trizivir, Combivir/nelfinavir, and lamivudine/stavudine/nelfinavir on lipids, metabolic parameters and efficacy in antiretroviral-naive patients: effect of sex and ethnicity                                                                                 |
| 288                                                                      | MacArthur                      | 2006 | A comparison of three highly active antiretroviral treatment strategies consisting of non-nucleoside reverse transcriptase inhibitors, protease inhibitors, or both in the presence of nucleoside reverse transcriptase inhibitors as initial therapy (CPCRA 058 FIRST Study): a long-term randomised trial |
| 289                                                                      | Goebel                         | 2006 | Short-term antiviral activity of TMC278--a novel NNRTI--in treatment-naive HIV-1-infected subjects                                                                                                                                                                                                          |
| 290                                                                      | Johnson                        | 2006 | 96-week comparison of once-daily atazanavir/ritonavir and twice-daily lopinavir/ritonavir in patients with multiple virologic failures                                                                                                                                                                      |
| 291                                                                      | Moyle                          | 2006 | A randomized comparative trial of tenofovir DF or abacavir as replacement for a thymidine analogue in persons with lipodystrophy                                                                                                                                                                            |
| 292                                                                      | Bartlett                       | 2006 | Long-term results of initial therapy with abacavir and Lamivudine combined with Efavirenz, Amprenavir/Ritonavir, or Stavudine                                                                                                                                                                               |
| 293                                                                      | Lamarca                        | 2006 | Efficacy and safety of a once-daily fixed-dose combination of abacavir/lamivudine compared with abacavir twice daily and lamivudine once daily as separate entities in antiretroviral-experienced HIV-1-infected patients (CAL30001 Study)                                                                  |
| 294                                                                      | Boyd                           | 2006 | Boosted versus unboosted indinavir with zidovudine and lamivudine in nucleoside pre-treated patients: a randomized, open-label trial with 112 weeks of follow-up (HIV-NAT 005)                                                                                                                              |

**Table S4 – List of excluded studies by exclusion reason (continuation)**

| Studies excluded for not describing adverse events specifically in women |                                |      |                                                                                                                                                                                                                                                                |
|--------------------------------------------------------------------------|--------------------------------|------|----------------------------------------------------------------------------------------------------------------------------------------------------------------------------------------------------------------------------------------------------------------|
| Amount                                                                   | First author or research group | Year | Title                                                                                                                                                                                                                                                          |
| 295                                                                      | Moyle                          | 2006 | An open-label, randomized comparative pilot study of a single-class quadruple therapy regimen versus a 2-class triple therapy regimen for individuals initiating antiretroviral therapy                                                                        |
| 296                                                                      | Pozniak                        | 2006 | Tenofovir disoproxil fumarate, emtricitabine, and efavirenz versus fixed-dose zidovudine/lamivudine and efavirenz in antiretroviral-naïve patients: virologic, immunologic, and morphologic changes--a 96-week analysis                                        |
| 297                                                                      | NR                             | 2006 | A Multicenter, Double-Blind, Randomized, Placebo-Controlled Study to Evaluate the Safety and Antiretroviral Activity of MK-0518 in Combination With an Optimized Background Therapy (OBT), Versus Optimized Background Therapy Alone, in HIV-Infected Patients |
| 298                                                                      | NR                             | 2006 | Open-label, randomised clinical trial to compare the virological efficacy and safety of Atazanavir/Ritonavir on a background of Tenofovir and Emtricitabine vs. Nevirapine on same background, in HIV-1-infected patients who have received no previous antire |
| 299                                                                      | NR                             | 2006 | A Multicenter, Double-Blind, Randomized, Active-Controlled Study to Evaluate the Safety and Antiretroviral Activity of MK- 0518 Versus Efavirenz in Treatment Naïve HIV-Infected Patients, Each in Combination With TRUVADA™ - MK-0518 safety and efficacy stu |
| 300                                                                      | NR                             | 2006 | Pilot phase IV, multicenter, randomized, open-label and controlled study to assess the evolution of peripheral body fat distribution after switching from AZT containing backbone to Truvada in HIV-1-infected patients on HAART (RECOMB Study) - RECOMB       |
| 301                                                                      | NR                             | 2006 | A randomised, controlled, open-label trial to compare the efficacy, safety and tolerability of a treatment simplification by darunavir/ritonavir (DRV/r) 800/100 mg O.D. versus a triple combination therapy containing DRV/r in HIV-1 infected subjects with  |
| 302                                                                      | NR                             | 2006 | A 24-week, randomised, open-label, 2-arm study to compare the tolerability and efficacy of saquinavir tablets with ritonavir versus lopinavir/ritonavir tablets in HIV 1 infected adults switching from Kaletra capsules - LoCKIT Study                        |
| 303                                                                      | NR                             | 2006 | Host genetic factors influencing drug disposition and response to HIV treatment - Pharmacogenetics of HIV Therapy                                                                                                                                              |
| 304                                                                      | NR                             | 2006 | A Randomized, Double-Blind, Phase II Study Comparing the Anti-Retroviral Safety and Efficacy of Dextelvucitabine (DFC) 200 mg Once Daily to Lamivudine (3TC) 300 mg Once Daily in Addition to Optimized Background Therapy in HIV-1 Infected Subjects Who Have |
| 305                                                                      | NR                             | 2006 | A Randomized, Controlled, Open-Label, 48-Week Study of Continuing Successfully Suppressing Treatment in HIV-1 Infected Adults with First-Line Twice-Daily Zidovudine and Lamivudine-Based Regimens versus Proactively Replacing of Zidovudine and Lamivudine b |
| 306                                                                      | NR                             | 2006 | A Phase IIIB, Randomized, Open-Label, Multicenter Study of the Safety and Efficacy of GW433908 700mg BID plus ritonavir 100mg BID Versus Lopinavir/ritonavir 400mg/100mg BID when Administered in Combination with the Abacavir/Lamivudine 600mg/300mg Fixed-D |
| 307                                                                      | NR                             | 2006 | A 96 Week Phase IIIB Study Comparing the Antiviral Efficacy and Safety of Atazanavir/ritonavir ATV/RTV with Lopinavir/ritonavir LPV/RTV , Each in Combination with Fixed Dose Tenofovir-Emtricitabine in HIV-1 infected treatment naïve subjects. - Castle     |
| 308                                                                      | NR                             | 2006 | A multicenter, randomized, prospective, controlled study to evaluate the efficacy and the tolerability of a switch to a two different-dosed, nevirapine-based HAARTs in HIV-1 infected patients with undetectable plasma viremia. - SNODO                      |
| 309                                                                      | NR                             | 2006 | Safety and Efficacy of Tenofovir DF in HIV-1 Infected Adolescents Failing Their Current Antiretroviral Therapy                                                                                                                                                 |



**Table S4 – List of excluded studies by exclusion reason (continuation)**

| Studies excluded for not describing adverse events specifically in women |                                |      |                                                                                                                                                                                  |
|--------------------------------------------------------------------------|--------------------------------|------|----------------------------------------------------------------------------------------------------------------------------------------------------------------------------------|
| Amount                                                                   | First author or research group | Year | Title                                                                                                                                                                            |
| 310                                                                      | NR                             | 2006 | Randomized, Double-Blind Study Comparing Dextelvucitabine (DFC) to Lamivudine (3TC) in Subjects With Resistance to NRTIs, PIs, and NNRTIs                                        |
| 311                                                                      | NR                             | 2006 | Evaluation of two Trizivir-based strategies of induction-maintenance in antiretroviral-naïve HIV-infected patients                                                               |
| 312                                                                      | NR                             | 2006 | TMC125-C203: phase II Randomized (Patients Are Assigned Different Treatments Based on Chance), Placebo Controlled Dose Escalating Trial of TMC125 in HIV-1 Infected Patients     |
| 313                                                                      | NR                             | 2006 | Safety Study of Elvucitabine in HIV-1 Subjects                                                                                                                                   |
| 314                                                                      | NR                             | 2006 | A Randomized, Prospective Study of the Efficacy, Safety and Tolerability of Two Doses of GW433908Ritonavir Given With Abacavir/Lamivudine Fixed Dose Combination                 |
| 315                                                                      | NR                             | 2006 | BMS-Reyataz Study in Treatment in Naïve Subjects to Compare the Efficacy and Safety Between Boosted Reyataz and Kaletra When in Combination With Fixed Dose Truvada              |
| 316                                                                      | NR                             | 2006 | Trial to Evaluate Steady State Pharmacokinetic Parameters, Efficacy and Safety of Nevirapine in Antiretroviral Drug naïve Pediatric Patients                                     |
| 317                                                                      | NR                             | 2006 | Phase II Study on the Antiviral Activity and Safety of BILR 355 BS in HIV-1 Infected, NNRTI-treated Patients                                                                     |
| 318                                                                      | NR                             | 2006 | Study to Evaluate the Effectiveness of ABC+3TC +EFV in Once-Daily Regimens Versus KLT in Twice-Daily Regimens in Naïve HIV Patients                                              |
| 319                                                                      | NR                             | 2006 | 3 TPV/RTV Doses in Multiple ARV Experienced Patients - Tipranavir Dose Defining Study                                                                                            |
| 320                                                                      | NR                             | 2006 | Study Comparing Reducing the Dose of Stavudine Versus Switching to Tenofovir in HIV-Infected Patients Receiving Antiretroviral Therapy                                           |
| 321                                                                      | NR                             | 2006 | Immuno-Virological Efficacy of Combination With Trizivir +Tenofovir in Multiresistant HIV Patients                                                                               |
| 322                                                                      | NR                             | 2006 | Safety and Effectiveness of Short-Term Anti-HIV Drug Therapy for Recent HIV-1 Infection                                                                                          |
| 323                                                                      | NR                             | 2006 | Comparing the Effectiveness Between Ritonavir Boosted Atazanavir and Efavirenz for the First HIV Treatment                                                                       |
| 324                                                                      | NR                             | 2006 | A Study to Evaluate the Safety and Efficacy of Raltegravir (MK0518) in HIV-Infected Patients Failing Current Antiretroviral Therapies (MK0518-018 EXT2)                          |
| 325                                                                      | NR                             | 2006 | A Study to Evaluate the Safety and Antiretroviral Activity of MK-0518 Versus Efavirenz in Treatment Naïve HIV-Infected Patients, Each in Combination With TRUVADA (0518-021 EXT) |
| 326                                                                      | NR                             | 2006 | A Study to Evaluate the Safety and Efficacy of Raltegravir (MK0518) in HIV-Infected Patients Failing Current Antiretroviral Therapies (0518-019)                                 |
| 327                                                                      | NR                             | 2006 | Single Tablet Regimen (STR) Simplification Study for HIV-1 Infected Patients                                                                                                     |
| 328                                                                      | NR                             | 2006 | Elvucitabine/Efavirenz/Tenofovir vs. Lamivudine/Efavirenz/Tenofovir in HIV-1 Infected, Treatment Naïve Subjects                                                                  |
| 329                                                                      | NR                             | 2006 | Study on the Effect of Kaletra + Nevirapine as Maintenance Bithrapy Compared to a Triple Therapy Including Kaletra + Analogues in HIV Patients                                   |
| 330                                                                      | NR                             | 2006 | Nevirapine or Atazanavir/Ritonavir Given With Emtricitabine/Tenofovir in Human Immunodeficiency Virus (HIV)-1-infected Treatment Naïve Adults                                    |
| 331                                                                      | NR                             | 2006 | A Study of an Investigational Regimen Combining FDA Approved HIV Drugs in HIV-Infected Subjects                                                                                  |
| 332                                                                      | NR                             | 2006 | ALTAIR - Alternative Antiretroviral Strategies : a Comparison of Three Initial Regimens                                                                                          |

**Table S4 – List of excluded studies by exclusion reason (continuation)**

| Studies excluded for not describing adverse events specifically in women |                                |      |                                                                                                                                                                                                                                                                |
|--------------------------------------------------------------------------|--------------------------------|------|----------------------------------------------------------------------------------------------------------------------------------------------------------------------------------------------------------------------------------------------------------------|
| Amount                                                                   | First author or research group | Year | Title                                                                                                                                                                                                                                                          |
| 333                                                                      | NR                             | 2006 | Monotherapy Versus Placebo Over 10 Days in Integrase Naive HIV-1 Infected Adults                                                                                                                                                                               |
| 334                                                                      | NR                             | 2006 | SP01A: the Study of an Oral Entry Inhibitor in Treatment-Experienced HIV Patients                                                                                                                                                                              |
| 335                                                                      | NR                             | 2006 | Study of Lopinavir/Ritonavir Tablets Comparing Once-Daily Versus Twice-Daily Administration When Coadministered With Nucleoside/Nucleotide Reverse Transcriptase Inhibitors in Antiretroviral-Experienced Human Immunodeficiency Virus Type 1 Infected Subject |
| 336                                                                      | Gatell                         | 2007 | Efficacy and safety of atazanavir-based highly active antiretroviral therapy in patients with virologic suppression switched from a stable, boosted or unboosted protease inhibitor treatment regimen: the SWAN Study (AI424-097) 48-week results              |
| 337                                                                      | Grinsztejn                     | 2007 | Safety and efficacy of the HIV-1 integrase inhibitor raltegravir (MK-0518) in treatment-experienced patients with multidrug-resistant virus: a phase II randomised controlled trial                                                                            |
| 338                                                                      | Lazzarin                       | 2007 | Efficacy and safety of TMC125 (etravirine) in treatment-experienced HIV-1-infected patients in DUET-2: 24-week results from a randomised, double-blind, placebo-controlled trial                                                                               |
| 339                                                                      | Madrugá                        | 2007 | Efficacy and safety of darunavir-ritonavir compared with that of lopinavir-ritonavir at 48 weeks in treatment-experienced, HIV-infected patients in TITAN: a randomised controlled phase III trial                                                             |
| 340                                                                      | Madrugá                        | 2007 | Efficacy and safety of TMC125 (etravirine) in treatment-experienced HIV-1-infected patients in DUET-1: 24-week results from a randomised, double-blind, placebo-controlled trial                                                                               |
| 341                                                                      | Mallolas                       | 2007 | A randomized trial comparing the efficacy and tolerability of two HAART strategies at two years in antiretroviral naive patients                                                                                                                               |
| 342                                                                      | Parietti                       | 2007 | Efavirenz to nevirapine switch in HIV-1-infected patients with dyslipidemia: a randomized, controlled study                                                                                                                                                    |
| 343                                                                      | Gulick                         | 2007 | Intensification of a triple-nucleoside regimen with tenofovir or efavirenz in HIV-1-infected patients with virological suppression                                                                                                                             |
| 344                                                                      | Haubrich                       | 2007 | Week 24 efficacy and safety of TMC114/ritonavir in treatment-experienced HIV patients                                                                                                                                                                          |
| 345                                                                      | Katlama                        | 2007 | Efficacy and safety of TMC114/ritonavir in treatment-experienced HIV patients: 24-week results of POWER 1                                                                                                                                                      |
| 346                                                                      | Molina                         | 2007 | A lopinavir/ritonavir-based once-daily regimen results in better compliance and is non-inferior to a twice-daily regimen through 96 weeks                                                                                                                      |
| 347                                                                      | Loutfy                         | 2007 | Randomized controlled trial of once-daily tenofovir, lamivudine, and lopinavir/ritonavir versus remaining on the same regimen in virologically suppressed HIV-infected patients on their first PI-containing HAART regimen                                     |
| 348                                                                      | Markowitz                      | 2007 | Rapid and durable antiretroviral effect of the HIV-1 Integrase inhibitor raltegravir as part of combination therapy in treatment-naive patients with HIV-1 infection: results of a 48-week controlled study                                                    |
| 349                                                                      | Podzamczak                     | 2007 | Less lipodystrophy and better lipid profile with abacavir as compared to stavudine: 96-week results of a randomized study                                                                                                                                      |
| 350                                                                      | NR                             | 2007 | Vicriviroc in Combination Treatment with an Optimized ART Regimen in HIV-Infected Treatment-Experienced Subjects (VICTOR-E4) - VICTOR-E4                                                                                                                       |
| 351                                                                      | NR                             | 2007 | Study of Once-Daily Versus Twice-Daily Fosamprenavir plus Ritonavir, Administered with Abacavir/Lamivudine Once-Daily in Antiretroviral-Naïve HIV-1 Infected Adult Subjects. - Merit                                                                           |

**Table S4 – List of excluded studies by exclusion reason (continuation)**

| Studies excluded for not describing adverse events specifically in women |                                |      |                                                                                                                                                                                                                                                                 |
|--------------------------------------------------------------------------|--------------------------------|------|-----------------------------------------------------------------------------------------------------------------------------------------------------------------------------------------------------------------------------------------------------------------|
| Amount                                                                   | First author or research group | Year | Title                                                                                                                                                                                                                                                           |
| 352                                                                      | NR                             | 2007 | Effect and safety of switching from zidovudin to either tenofovir or abacavir in patients suffering from HIV. An open label study. - SWAP-TA                                                                                                                    |
| 353                                                                      | NR                             | 2007 | IMPACTO DE LA INTENSIFICACIÓN CON RALTEGRAVIR EN LA LATENCIA VIRAL DE VIH-1 EN PACIENTES CON SUPRESIÓN VIRAL COMPLETA (IMPACT OF RALTEGRAVIR INTENSIFICATION ON HIV-1 VIRAL LATENCY IN PATIENTS WITH PREVIOUS COMPLETE VIRAL SUPPRESSION). - INTEGRAL           |
| 354                                                                      | NR                             | 2007 | A Multicenter, Double-Blind, Randomized, Active-Controlled Study to Evaluate the Safety and Antiretroviral Activity of MK-0518 Versus KALETRA™ in HIV-Infected Patients Switched from a Stable KALETRA™-Based Regimen - Study A                                 |
| 355                                                                      | NR                             | 2007 | A randomised prospective study assessing changes in neuro-cognitive function, using a computerised test battery, in treatment naïve HIV-1 positive subjects commencing two different antiretroviral regimens. - CogNaive Study                                  |
| 356                                                                      | NR                             | 2007 | A randomized, open-label trial to compare the efficacy, safety and tolerability of DRV/rtv (800/100 mg) q.d. versus DRV/rtv (600/100 mg) b.i.d. in early treatment-experienced HIV-1 infected subjects. - Once-daily Darunavir In treatment-experienced patient |
| 357                                                                      | NR                             | 2007 | A phase IV study to assess the feasibility of substituting double ritonavir-boosted protease inhibitors (PI) with ritonavir-boosted darunavir (DRV/r) in HIV-infected individuals with viral suppression on highly active antiretroviral therapy (HAART) - Dou  |
| 358                                                                      | NR                             | 2007 | A Phase 4, Open Label, Randomized, Controlled Study to Assess the Effect on Lipid Profile of Switching from a Stable HAART Regimen of fixed dose Abacavir/Lamivudine (Kivexa) Plus Efavirenz, to Once Daily Atripla in Adult HIV-1 Infected Subjects With Rai   |
| 359                                                                      | NR                             | 2007 | A Phase III, Randomised, Open- Label Study Comparing the Safety and Efficacy of Switching Stavudine or Zidovudine to Tenofovir Disoproxil Fumarate versus Continuing Stavudine or Zidovudine in Virologically Suppressed HIV-Infected Children Taking Highly A  |
| 360                                                                      | NR                             | 2007 | A randomised open-label study comparing the safety and efficacy of three different combination antiretroviral regimens as initial therapy for HIV infection. - Altair                                                                                           |
| 361                                                                      | NR                             | 2007 | Randomized, controlled, multicentric trial to evaluate efficacy and safety of the switch from a LPV/r based therapy to an ATV/r or a NVP based treatment in association with ABC/3TC, in HIV patient with undetectable viral load                               |
| 362                                                                      | NR                             | 2007 | Randomized, monocentric trial on sintoms, adherence, toxicity of alternate antiretrovirale regimen - ND                                                                                                                                                         |
| 363                                                                      | NR                             | 2007 | A pilot, randomized trial to evaluate the lipid profile after antiretroviral regimens including nevirapine or atazanavir boosted with ritonavir in HIV-positive patients naive for antiretrovirals - STAR2                                                      |
| 364                                                                      | NR                             | 2007 | Efficacy and Safety of VICRIVIROC in HIV-Infected Treatment-Naïve Subjects - P04875                                                                                                                                                                             |
| 365                                                                      | NR                             | 2007 | Study of Once-Daily Abacavir/Lamivudine versus Tenofovir/Emtricitabine, Administered with Efavirenz in Antiretroviral-Naïve, HIV-1 Infected Adult Subjects - CNA109586                                                                                          |
| 366                                                                      | NR                             | 2007 | Early Access of MK-0518 in Combination With an Optimized Background Antiretroviral Therapy (OBT) in Highly Treatment Experienced HIV-1 Infected Patients With Limited to No Treatment Options                                                                   |

**Table S4 – List of excluded studies by exclusion reason (continuation)**

| Studies excluded for not describing adverse events specifically in women |                                |      |                                                                                                                                                                                                                                                                |
|--------------------------------------------------------------------------|--------------------------------|------|----------------------------------------------------------------------------------------------------------------------------------------------------------------------------------------------------------------------------------------------------------------|
| Amount                                                                   | First author or research group | Year | Title                                                                                                                                                                                                                                                          |
| 367                                                                      | NR                             | 2007 | Second-line Anti-Retroviral therapy in Africa: a randomised trial to evaluate the feasibility of maintenance monotherapy with ritonavir-boosted lopinavir (Aluvia® tablets) following initiation with 24 weeks of combination therapy in second-line anti-retr |
| 368                                                                      | NR                             | 2007 | Efficacy and Safety of VICRIVIROC in HIV-Infected Treatment-Naïve Subjects (Study P04875)                                                                                                                                                                      |
| 369                                                                      | NR                             | 2007 | A Study of Indinavir Plus Ritonavir Plus Two NRTIs vs. Nelfinavir Plus Two NRTIs in HIV Positive Patients (0639-112)(COMPLETED)                                                                                                                                |
| 370                                                                      | NR                             | 2007 | Comparison of TPV/r to DRV/r in Triple Class Experienced Patient With Resistance to > 1 PI                                                                                                                                                                     |
| 371                                                                      | NR                             | 2007 | Incidence and Severity of Neuropsychiatric Adverse Events of Efavirenz Given as a Stepped Dosage vs. the Usual Dosage                                                                                                                                          |
| 372                                                                      | NR                             | 2007 | SPRING: safety, Efficacy, Pharmacokinetics of tipRanavir/r IN Race/Gender HIV+ Patients Randomized to TDM or SoC                                                                                                                                               |
| 373                                                                      | NR                             | 2007 | Lopinavir Capsules to Kaletra or Invirase Tablets                                                                                                                                                                                                              |
| 374                                                                      | NR                             | 2007 | Tipranavir/Ritonavir Low Dose Pharmacokinetics in Treatment Naive Patients                                                                                                                                                                                     |
| 375                                                                      | NR                             | 2007 | VERxVE Study on Efficacy and Safety of Nevirapine XR in Comparison to Nevirapine IR With Truvada in Naive HIV+ Patients                                                                                                                                        |
| 376                                                                      | NR                             | 2007 | Effect of Atazanavir on Endothelial Function in HIV-Infected Patients                                                                                                                                                                                          |
| 377                                                                      | NR                             | 2007 | Nevirapine vs. Atazanavir Boosted With Ritonavir on a Background of Truvada in Human Immunodeficiency Virus (HIV) Infected Naive Patients (NEwArT)                                                                                                             |
| 378                                                                      | NR                             | 2007 | Study Comparing Efficacy and Safety of Darunavir Boosted With Ritonavir to HART With 2 NRTI and Darunavir Boosted With Ritonavir in HIV-1 Infected Patients ANRS136                                                                                            |
| 379                                                                      | NR                             | 2007 | Safety and Efficacy of Switching From Stavudine or Zidovudine to Tenofovir DF in HIV-1 Infected Children                                                                                                                                                       |
| 380                                                                      | NR                             | 2007 | Comparison of Epzicom and Truvada for the Initial Once Daily HIV Treatment                                                                                                                                                                                     |
| 381                                                                      | NR                             | 2007 | Switching From PI to RALtegravir in HIV Stable Patients                                                                                                                                                                                                        |
| 382                                                                      | NR                             | 2007 | Once-daily Antiretroviral Therapy in HIV-1 Infected Patients With CD4+ Cell Counts Below 100 Cells/Mcl                                                                                                                                                         |
| 383                                                                      | NR                             | 2007 | TMC278-TiDP6-C215: a Clinical Trial in Treatment Naive HIV-subjects Patients Comparing TMC278 to Efavirenz in Combination With 2 Nucleoside/Nucleotide Reverse Transcriptase Inhibitors                                                                        |
| 384                                                                      | NR                             | 2007 | Standard Antiretroviral v. Multi-class Therapy in Acutely HIV-1 Infected Antiretroviral-Naïve Subjects (ADARC 2007-01)                                                                                                                                         |
| 385                                                                      | NR                             | 2007 | A Study to Evaluate the Safety and Efficacy of Adding Enfuvirtide to Oral Highly Active Antiretroviral Therapy (HAART) in Human Immunodeficiency Virus (HIV) Patients With Prior Treatment Experience                                                          |
| 386                                                                      | NR                             | 2007 | Vicriviroc in HIV(R5/X4)-Treatment Experienced Subjects (Study P05057AM5)(COMPLETED)                                                                                                                                                                           |
| 387                                                                      | NR                             | 2007 | Vicriviroc in HIV-Treatment Experienced Subjects (Study P04405AM5)                                                                                                                                                                                             |
| 388                                                                      | NR                             | 2007 | A Study to Compare Effectiveness and Safety of Darunavir/Ritonavir (DRV/Rtv) 800mg/100mg Once Daily Versus DRV/Rtv 600mg/100mg Twice Daily in Early Treatment-Experienced HIV-1 Infected Patients (ODIN)                                                       |
| 389                                                                      | NR                             | 2007 | Vicriviroc in HIV-Treatment Experienced Subjects (Study P04889AM8)(COMPLETED)                                                                                                                                                                                  |

**Table S4 – List of excluded studies by exclusion reason (continuation)**

| Studies excluded for not describing adverse events specifically in women |                                |      |                                                                                                                                                                                                                                                                |
|--------------------------------------------------------------------------|--------------------------------|------|----------------------------------------------------------------------------------------------------------------------------------------------------------------------------------------------------------------------------------------------------------------|
| Amount                                                                   | First author or research group | Year | Title                                                                                                                                                                                                                                                          |
| 390                                                                      | NR                             | 2007 | Treatment Simplification by Darunavir/Ritonavir 800/100 mg Once a Day Versus a Triple Combination Therapy With Darunavir/Ritonavir                                                                                                                             |
| 391                                                                      | NR                             | 2007 | Induction/Simplification With Atazanavir + Ritonavir + Abacavir/Lamivudine Fixed-Dose Combination In HIV-1 Infection                                                                                                                                           |
| 392                                                                      | Dart Trial Team                | 2008 | Twenty-four-week safety and tolerability of nevirapine vs. abacavir in combination with zidovudine/lamivudine as first-line antiretroviral therapy: a randomized double-blind trial (NORA)                                                                     |
| 393                                                                      | Duvivier                       | 2008 | Initial therapy with nucleoside reverse transcriptase inhibitor-containing regimens is more effective than with regimens that spare them with no difference in short-term fat distribution: Hippocampe-ANRS 121 Trial                                          |
| 394                                                                      | Clotet                         | 2008 | A randomized, controlled study evaluating an induction treatment strategy in which enfuvirtide was added to an oral, highly active antiretroviral therapy regimen in treatment-experienced patients: the INTENSE study                                         |
| 395                                                                      | Smith                          | 2008 | Fosamprenavir or atazanavir once daily boosted with ritonavir 100 mg, plus tenofovir/emtricitabine, for the initial treatment of HIV infection: 48-week results of ALERT                                                                                       |
| 396                                                                      | McComsey                       | 2008 | Effect of reducing the dose of stavudine on body composition, bone density, and markers of mitochondrial toxicity in HIV-infected subjects: a randomized, controlled study                                                                                     |
| 397                                                                      | Molina                         | 2008 | Once-daily atazanavir/ritonavir versus twice-daily lopinavir/ritonavir, each in combination with tenofovir and emtricitabine, for management of antiretroviral-naïve HIV-1-infected patients: 48 week efficacy and safety results of the CASTLE study          |
| 398                                                                      | Riddler                        | 2008 | Class-sparing regimens for initial treatment of HIV-1 infection                                                                                                                                                                                                |
| 399                                                                      | Carr                           | 2008 | Effects of boosted tipranavir and lopinavir on body composition, insulin sensitivity and adipocytokines in antiretroviral-naïve adults                                                                                                                         |
| 400                                                                      | Delfraissy                     | 2008 | Lopinavir/ritonavir monotherapy or plus zidovudine and lamivudine in antiretroviral-naïve HIV-infected patients                                                                                                                                                |
| 401                                                                      | Mallolas                       | 2008 | Induction therapy with trizivir plus efavirenz or lopinavir/ritonavir followed by trizivir alone in naïve HIV-1-infected adults                                                                                                                                |
| 402                                                                      | Ortiz                          | 2008 | Efficacy and safety of once-daily darunavir/ritonavir versus lopinavir/ritonavir in treatment-naïve HIV-1-infected patients at week 48                                                                                                                         |
| 403                                                                      | Tashima                        | 2008 | Efficacy and tolerability of long-term efavirenz plus nucleoside reverse transcriptase inhibitors for HIV-1 infection                                                                                                                                          |
| 404                                                                      | Collier                        | 2008 | Randomized study of dual versus single ritonavir-enhanced protease inhibitors for protease inhibitor-experienced patients with HIV                                                                                                                             |
| 405                                                                      | Arribas                        | 2008 | Tenofovir disoproxil fumarate, emtricitabine, and efavirenz compared with zidovudine/lamivudine and efavirenz in treatment-naïve patients: 144-week analysis                                                                                                   |
| 406                                                                      | Malan                          | 2008 | Efficacy and safety of atazanavir, with or without ritonavir, as part of once-daily highly active antiretroviral therapy regimens in antiretroviral-naïve patients                                                                                             |
| 407                                                                      | Walmsley                       | 2008 | Pharmacokinetics, safety, and efficacy of tipranavir boosted with ritonavir alone or in combination with other boosted protease inhibitors as part of optimized combination antiretroviral therapy in highly treatment-experienced patients (BI Study 1182.51) |
| 408                                                                      | van den Berg-Wolf              | 2008 | Virologic, immunologic, clinical, safety, and resistance outcomes from a long-term comparison of efavirenz-based versus nevirapine-based antiretroviral regimens as initial therapy in HIV-1-infected persons                                                  |
| 409                                                                      | NR                             | 2008 | Safety and Pharmacokinetics Study of Multiple Dose Administration of Sifuvirtide in HIV-infected volunteers (FS0103)                                                                                                                                           |

**Table S4 – List of excluded studies by exclusion reason (continuation)**

| Studies excluded for not describing adverse events specifically in women |                                |      |                                                                                                                                                                                                                                                                |
|--------------------------------------------------------------------------|--------------------------------|------|----------------------------------------------------------------------------------------------------------------------------------------------------------------------------------------------------------------------------------------------------------------|
| Amount                                                                   | First author or research group | Year | Title                                                                                                                                                                                                                                                          |
| 410                                                                      | NR                             | 2008 | Efficacy, safety, and pharmacokinetics study of Sifuvirtide for Injection in combination with HAART therapy in HIV infected subjects                                                                                                                           |
| 411                                                                      | NR                             | 2008 | A Phase 4, Open Label, Randomized, Controlled Study to Assess the Effect on Lipid Profile of Switching a Stable HAART Regimen of fixed dose Abacavir/Lamivudine (Kivexa) Plus Lopinavir/Ritonavir (Kaletra), to Emtricitabine/Tenofovir Disoproxil Fumarate (T |
| 412                                                                      | NR                             | 2008 | An open label, phase IIIb, randomized parallel group study to assess the efficacy and safety of switching HIV-1 infected patients successfully treated with a Nevirapine IR based regimen to Nevirapine XR 400 mg QD or remaining on Nevirapine IR 200 mg BIDb |
| 413                                                                      | NR                             | 2008 | CLINICAL TRIAL ASSESSING ONCE DAILY RALTEGRAVIR ADMINISTRATION (800 mg QD) IN HIV-1-INFECTED PATIENTS RECEIVING UNBOOSTED ATAZANAVIR (400 mg QD)-BASED ANTIRETROVIRAL THERAPY (ENSAYO CLÍNICO PARA EVALUAR LA ADMINISTRACIÓN DE RALTEGRAVIR UNA VEZ AL DÍA (80 |
| 414                                                                      | NR                             | 2008 | A Multicenter, Randomized, Open-Label, Active-Controlled Pilot Study to Evaluate the Safety and Antiretroviral Activity of Unboosted Atazanavir BID Plus Raltegravir BID and Boosted Atazanavir QD in Combination with Tenofovir/Emtricitabine QD in Treatment |
| 415                                                                      | NR                             | 2008 | A phase IV, two-arm, open-label, single-centre randomised pilot study to assess the feasibility of immediate or deferred switching of HIV-infected individuals intolerant of efavirenz, ritonavir-boosted lopinavir or ritonavir-boosted atazanavir, to ritona |
| 416                                                                      | NR                             | 2008 | A Multicenter, Randomized, Double-Blind, Phase 2b Trial to Determine The Efficacy, Tolerability And Safety Of 3 Dose Regimens Of RDEA806 and Open-Label Efavirenz as Active Control in HIV 1-Infected, Antiretroviral Naïve Subjects - Dose Response Naïve Eff |
| 417                                                                      | NR                             | 2008 | A phase III, double blind, multi centre, randomised placebo controlled, pilot study to assess the feasibility of switching individuals receiving efavirenz with continuing Central Nervous System (CNS) toxicity to TMC125 - Efavirenz toxicity switch to etra |
| 418                                                                      | NR                             | 2008 | A clinical investigation study comparing elvitegravir with raltegravir, each administered with a background treatment in HIV-1 infected patients already on treatment with antiretroviral medicinal products                                                   |
| 419                                                                      | NR                             | 2008 | A randomised, controlled, open-label trial to compare brachial artery reactivity and cardiovascular risk of a treatment simplification by darunavir/ritonavir (DRV/r) 800/100 mg O.D. versus a triple combination therapy containing DRV/r in HIV-1 infected s |
| 420                                                                      | NR                             | 2008 | A randomized, open-label, study of lopinavir/ritonavir 400/100 mg tablet twice-daily + co-formulated emtricitabine/tenofovir disoproxil fumarate 200/300 mg once-daily versus lopinavir/ritonavir 400/100 mg tablet twice-daily + raltegravir 400 mg twice-dai |
| 421                                                                      | NR                             | 2008 | A Phase III Multicenter, Double-Blind, Randomized, Active Comparator-Controlled Clinical Trial to Study the Safety and Efficacy of Once Daily Raltegravir (MK-0518) Versus Twice Daily Raltegravir, Each in Combination With TRUVADA™, in Treatment-Naïve HIV  |
| 422                                                                      | NR                             | 2008 | A phase 2b/3, randomized, double blind, dose confirming study of the safety, efficacy and tolerability of apricitabine versus lamivudine in treatment-experienced HIV-1 infected patients with the M184V/I mutation in reverse transcriptase - AVX-301         |
| 423                                                                      | NR                             | 2008 | A Phase III, randomized, double-blind trial of TMC278 25 mg q.d. versus efavirenz 600 mg q.d. in combination with a fixed background regimen consisting of tenofovir disoproxil fumarate and emtricitabine in antiretroviral-naïve HIV-1 infected subjects - E |

**Table S4 – List of excluded studies by exclusion reason (continuation)**

| Studies excluded for not describing adverse events specifically in women |                                |      |                                                                                                                                                                                                                                             |
|--------------------------------------------------------------------------|--------------------------------|------|---------------------------------------------------------------------------------------------------------------------------------------------------------------------------------------------------------------------------------------------|
| Amount                                                                   | First author or research group | Year | Title                                                                                                                                                                                                                                       |
| 424                                                                      | NR                             | 2008 | A Double-Blind, Randomized, Multi-Center Trial to Evaluate the Safety and Efficacy of the Combination of 1592U89/Zidovudine (ZDV)/Lamivudine (3TC) Versus the Combination of Zidovudine (ZDV)/Lamivudine (3TC) in HIV-1 Therapy-Experienced |
| 425                                                                      | NR                             | 2008 | Safety and clinical effects of IDX12899 in HIV-1 infection                                                                                                                                                                                  |
| 426                                                                      | NR                             | 2008 | TMC114-C213: a Phase II Randomized, Controlled, Partially Blinded Trial to Investigate Dose-response of TMC114/RTV in 3-class-experienced HIV-1 Infected Patients, Followed by an Open-label Period on the Recommended Dose of TMC114/RTV   |
| 427                                                                      | NR                             | 2008 | Efficacy and Safety of MK-0518 in Treatment-Experienced HIV-1 Infected Adult Patients With Hemophilia                                                                                                                                       |
| 428                                                                      | NR                             | 2008 | Safety and Pharmacokinetic Study of Fixed Dose Combination of Zidovudine, Lamivudine, and Nevirapine in HIV-Infected Children in Thailand                                                                                                   |
| 429                                                                      | NR                             | 2008 | Kaletra-isentress Treatment Evaluation                                                                                                                                                                                                      |
| 430                                                                      | NR                             | 2008 | Efficacy and Safety of Switching From Retrovir to Tenofovir or Abacavir in HIV-infected Patients                                                                                                                                            |
| 431                                                                      | NR                             | 2008 | Tenofovir DF + Efavirenz (TDF+EFV) Versus Tenofovir DF + Efavirenz + Lamivudine (TDF+EFV+3TC) Maintenance Regimen in Virologically Controlled Patients: COOL Trial                                                                          |
| 432                                                                      | NR                             | 2008 | Pilot Study Switching Individuals Receiving EFV With Continuing Central Nervous System Toxicity to TMC125                                                                                                                                   |
| 433                                                                      | NR                             | 2008 | Changes in Triglyceride and Other Lipids (Levels of Fats Found in Blood) When Taking Darunavir Compared to Atazanavir in HIV-infected Patients That Have Never Received Treatment                                                           |
| 434                                                                      | NR                             | 2008 | Safety and Efficacy Study of Switching From Epzicom to Truvada                                                                                                                                                                              |
| 435                                                                      | NR                             | 2008 | Pharmacokinetics, Pharmacodynamics, And Safety Of Maraviroc (UK-427,857) In Patients With Human Immunodeficiency Virus                                                                                                                      |
| 436                                                                      | NR                             | 2008 | INNOVE Study: a Study of 3 Months Induction With Fuzeon (Enfuvirtide) + Optimized Background (OB) Versus OB Alone in HIV-1 Infected Patients With Virological Failure                                                                       |
| 437                                                                      | NR                             | 2008 | Phase IIB Pilot of Atazanavir + Raltegravir                                                                                                                                                                                                 |
| 438                                                                      | NR                             | 2008 | Second-line Therapy Antiretroviral in Patients Who Failed Non-nucleoside Reverse Transcriptase Inhibitor (NNRTI) - Based Regimens                                                                                                           |
| 439                                                                      | NR                             | 2008 | Raltegravir vs. Atazanavir in Combination With Truvada® for the Treatment of Antiretroviral naïve HIV Infected Patients                                                                                                                     |
| 440                                                                      | NR                             | 2008 | Raltegravir vs. Lopinavir/Ritonavir, Both in Combination With Truvada, in HIV+ Treatment Naïve Individuals                                                                                                                                  |
| 441                                                                      | NR                             | 2008 | Multicenter, Randomized, Double-Blind, Double-Dummy, Phase 3 Study of the Safety and Efficacy of Elvitegravir Versus Raltegravir                                                                                                            |
| 442                                                                      | NR                             | 2008 | Pilot Study of Raltegravir/Truvada Versus Efavirenz/Truvada for Adults With Acute IV-1 Infection                                                                                                                                            |
| 443                                                                      | NR                             | 2008 | Raltegravir And Darunavir Antiretroviral in Antiretroviral Naïve Patients                                                                                                                                                                   |
| 444                                                                      | NR                             | 2008 | Raltegravir + Lopinavir/Ritonavir Versus Efavirenz + Tenofovir + Emtricitabine in Treatment Naïve Patients                                                                                                                                  |
| 445                                                                      | NR                             | 2008 | Raltegravir Therapy for Women With HIV and Fat Accumulation                                                                                                                                                                                 |
| 446                                                                      | NR                             | 2008 | Study Comparing Lopinavir/Ritonavir (LPV/r) + Emtricitabine/Tenofovir Disoproxil Fumarate (FTC/TDF) With a Nucleoside Sparing Regimen Consisting of Lopinavir/Ritonavir + Raltegravir (RAL)                                                 |
| 447                                                                      | NR                             | 2008 | Phase IIa Dose-ranging Study of GSK1349572 in HIV-1 Infected Adults                                                                                                                                                                         |

**Table S4 – List of excluded studies by exclusion reason (continuation)**

| Studies excluded for not describing adverse events specifically in women |                                |      |                                                                                                                                                                                                                                                                 |
|--------------------------------------------------------------------------|--------------------------------|------|-----------------------------------------------------------------------------------------------------------------------------------------------------------------------------------------------------------------------------------------------------------------|
| Amount                                                                   | First author or research group | Year | Title                                                                                                                                                                                                                                                           |
| 448                                                                      | NR                             | 2008 | Raltegravir (Isentress/MK-0518) and HIV-1 Infected CD4 Cells During Acute/Early HIV-1                                                                                                                                                                           |
| 449                                                                      | NR                             | 2008 | Pilot Study of a Raltegravir Based NRTI Sparing Regimen                                                                                                                                                                                                         |
| 450                                                                      | Pedro                          | 2008 | Raltegravir Added to Stable HAART in HIV-1 Infected Subjects With Viral Suppression and Low CD4 Recovery                                                                                                                                                        |
| 451                                                                      | NR                             | 2008 | TMC278-TiDP6-C209: A Clinical Trial in Treatment Naive HIV-1 Patients Comparing TMC278 to Efavirenz in Combination With Tenofovir + Emtricitabine                                                                                                               |
| 452                                                                      | Negredo                        | 2009 | Improvement of Mitochondrial Toxicity in Patients Receiving a Nucleoside Reverse-Transcriptase Inhibitor-Sparing Strategy: Results from the Multicenter Study with Nevirapine and Kaletra (MULTINEKA)                                                           |
| 453                                                                      | De Castro                      | 2009 | Switch from enfuvirtide to raltegravir in virologically suppressed multidrug-resistant HIV-1-infected patients: a randomized open-label trial                                                                                                                   |
| 454                                                                      | Flammer                        | 2009 | Effect of atazanavir versus other protease inhibitor-containing antiretroviral therapy on endothelial function in HIV-infected persons: randomised controlled trial                                                                                             |
| 455                                                                      | Arribas                        | 2009 | Lopinavir-ritonavir monotherapy versus lopinavir-ritonavir and 2 nucleosides for maintenance therapy of HIV: 96-week analysis                                                                                                                                   |
| 456                                                                      | Bussmann                       | 2009 | Response to zidovudine/didanosine-containing combination antiretroviral therapy among HIV-1 subtype C-infected adults in Botswana: two-year outcomes from a randomized clinical trial                                                                           |
| 457                                                                      | Saag                           | 2009 | A double-blind, placebo-controlled trial of maraviroc in treatment-experienced patients infected with non-R5 HIV-1                                                                                                                                              |
| 458                                                                      | Stanley                        | 2009 | Effects of switching from lopinavir/ritonavir to atazanavir/ritonavir on muscle glucose uptake and visceral fat in HIV-infected patients                                                                                                                        |
| 459                                                                      | Kumar                          | 2009 | A randomized, controlled trial of initial anti-retroviral therapy with abacavir/lamivudine/zidovudine twice-daily compared to atazanavir once-daily with lamivudine/zidovudine twice-daily in HIV-infected patients over 48 weeks (ESS100327, the ACTION Study) |
| 460                                                                      | Lennox                         | 2009 | Safety and efficacy of raltegravir-based versus efavirenz-based combination therapy in treatment-naive patients with HIV-1 infection: a multicentre, double-blind randomised controlled trial                                                                   |
| 461                                                                      | Martin                         | 2009 | Simplification of antiretroviral therapy with tenofovir-emtricitabine or abacavir-Lamivudine: a randomized, 96-week trial                                                                                                                                       |
| 462                                                                      | Pulido                         | 2009 | Long-term efficacy and safety of fosamprenavir plus ritonavir versus lopinavir/ritonavir in combination with abacavir/lamivudine over 144 weeks                                                                                                                 |
| 463                                                                      | Rey                            | 2009 | High rate of early virological failure with the once-daily tenofovir/lamivudine/nevirapine combination in naive HIV-1-infected patients                                                                                                                         |
| 464                                                                      | Mills                          | 2009 | Once-daily darunavir/ritonavir vs. lopinavir/ritonavir in treatment-naive, HIV-1-infected patients: 96-week analysis                                                                                                                                            |
| 465                                                                      | Smith                          | 2009 | Randomized, double-blind, placebo-matched, multicenter trial of abacavir/lamivudine or tenofovir/emtricitabine with lopinavir/ritonavir for initial HIV treatment                                                                                               |
| 466                                                                      | Calza                          | 2009 | Efficacy and safety of atazanavir-ritonavir plus abacavir-lamivudine or tenofovir-emtricitabine in patients with hyperlipidaemia switched from a stable protease inhibitor-based regimen including one thymidine analogue                                       |
| 467                                                                      | Carosi                         | 2009 | Study of once-daily versus twice-daily fosamprenavir plus ritonavir administered with abacavir/lamivudine once daily in antiretroviral-naïve HIV-1-infected adult subjects                                                                                      |



**Table S4 – List of excluded studies by exclusion reason (continuation)**

| Studies excluded for not describing adverse events specifically in women |                                |      |                                                                                                                                                                                                                                                                |
|--------------------------------------------------------------------------|--------------------------------|------|----------------------------------------------------------------------------------------------------------------------------------------------------------------------------------------------------------------------------------------------------------------|
| Amount                                                                   | First author or research group | Year | Title                                                                                                                                                                                                                                                          |
| 468                                                                      | Nunes                          | 2009 | Monotherapy with Lopinavir/Ritonavir as maintenance after HIV-1 viral suppression: results of a 96-week randomized, controlled, open-label, pilot trial (KalMo study)                                                                                          |
| 469                                                                      | Dejesus                        | 2009 | Simplification of antiretroviral therapy to a single-tablet regimen consisting of efavirenz, emtricitabine, and tenofovir disoproxil fumarate versus unmodified antiretroviral therapy in virologically suppressed HIV-1-infected patients                     |
| 470                                                                      | Fisher                         | 2009 | A randomized comparative trial of continued zidovudine/lamivudine or replacement with tenofovir disoproxil fumarate/emtricitabine in efavirenz-treated HIV-1-infected individuals                                                                              |
| 471                                                                      | Mallolas                       | 2009 | Efficacy and safety of switching from boosted lopinavir to boosted atazanavir in patients with virological suppression receiving a LPV/r-containing HAART: the ATAZIP study                                                                                    |
| 472                                                                      | Martínez                       | 2009 | A simplification trial switching from nucleoside reverse transcriptase inhibitors to once-daily fixed-dose abacavir/lamivudine or tenofovir/emtricitabine in HIV-1-infected patients with virological suppression                                              |
| 473                                                                      | Walmsley                       | 2009 | Gemini: A noninferiority study of saquinavir/ritonavir versus lopinavir/ritonavir as initial HIV-1 therapy in adults                                                                                                                                           |
| 474                                                                      | Hicks                          | 2009 | Comparison of once-daily fosamprenavir boosted with either 100 or 200 mg of ritonavir, in combination with abacavir/lamivudine: 96-week results from COL100758                                                                                                 |
| 475                                                                      | NR                             | 2009 | Randomized, Open label, Multiple-Dose Study to Evaluate the Pharmacodynamics, Safety and Pharmacokinetics of BMS-663068 in HIV-1 Infected Subjects                                                                                                             |
| 476                                                                      | NR                             | 2009 | PILOT STUDY TO ASSESS THE EFFICACY AND SAFETY OF SWITCHING PROTEASE INHIBITOR TO ETRAVIRINE IN HIV-1-INFECTED SUBJECTS WITH VIREMIA SUPPRESSION (ESTUDIO PILOTO PARA EVALUAR LA EFICACIA Y SEGURIDAD DE LA SIMPLIFICACIÓN DE UN INHIBIDOR DE LA PROTEASA A ETR |
| 477                                                                      | NR                             | 2009 | RANDOMISED AND PROSPECTIVE CLINICAL STUDY TO EVALUATE THE EFFICACY AND SAFETY OF LOPINAVIR/RITONAVIR MONOTHERAPY VS DARUNAVIR/RITONAVIR MONOTHERAPIES AS SIMPLIFICATION SWITCHING STRATEGIES OF PI/NNRTI-TRIPLE THERAPY BASED-REGIMENS                         |
| 478                                                                      | NR                             | 2009 | ENSAYO CLÍNICO PILOTO PARA EVALUAR LA SEGURIDAD Y EFICACIA DE CAMBIAR EL ITINAN O EL IP A MARAVIROC EN PACIENTES INFECTADOS POR EL VIH-1 CON CARGA VIRAL INDETECTABLE Y DISLIPEMIA ASOCIADA A LOS ANTIRETROVIRALES (PILOT STUDY TO ASSESS THE SAFETY AND EFICA |
| 479                                                                      | NR                             | 2009 | PILOT STUDY OF NOVEL COMBINATION OF MARAVIROC +ATAZANAVIR/RITONAVIR VS ATAZANAVIR/RITONAVIR +EMTRICITABINE/TENOFOVIR FOR THE TREATMENT OF TREATMENT NAÏVE HIV-INFECTED PATIENTS WITH R5 HIV-1                                                                  |
| 480                                                                      | NR                             | 2009 | PRotease-Inhibitors MOnotherapy Strategies as maintenance therapy in persons with fully suppressed HIV replication: results from an open-label randomized comparative trial (PRIMO Trial) - PRIMO Trial                                                        |
| 481                                                                      | NR                             | 2009 | A Phase IIb study to select a once daily oral dose of GSK1349572 administered with either abacavir/lamivudine or tenofovir/emtricitabine in HIV-1 infected antiretroviral therapy naïve adult subjects. - ND                                                   |

**Table S4 – List of excluded studies by exclusion reason (continuation)**

| Studies excluded for not describing adverse events specifically in women |                                |      |                                                                                                                                                                                                                                                                |
|--------------------------------------------------------------------------|--------------------------------|------|----------------------------------------------------------------------------------------------------------------------------------------------------------------------------------------------------------------------------------------------------------------|
| Amount                                                                   | First author or research group | Year | Title                                                                                                                                                                                                                                                          |
| 482                                                                      | NR                             | 2009 | Exploratory study on inflammatory immune response related to endothelial dysfunction in HIV-infected naïve patients treated with abacavir compared to tenofovir-based regimens. - ABRACADABRA                                                                  |
| 483                                                                      | NR                             | 2009 | Phase IIb pilot study for the evaluation of the safety and the feasibility of treatment simplification to tenofovir+emtricitabine+raltegravir or to lamivudine+abacavir+raltegravir in patients with optimal virological control and toxicity to the current c |
| 484                                                                      | NR                             | 2009 | Evaluation of Three Strategies of Second-line Antiretroviral Treatment in Africa (Dakar - Bobo-Dioulasso - Yaoundé)                                                                                                                                            |
| 485                                                                      | NR                             | 2009 | Study of the Safety and Efficacy of Stribild Versus Atripla in Human Immunodeficiency Virus, Type 1 (HIV-1) Infected, Antiretroviral Treatment-Naive Adults                                                                                                    |
| 486                                                                      | NR                             | 2009 | A Clinical Trial Comparing the Tolerability of Etravirine to Efavirenz in Combination With 2 Nucleoside/Nucleotide Reverse Transcriptase Inhibitors in Treatment-naïve HIV-1 Infected Patients                                                                 |
| 487                                                                      | NR                             | 2009 | Artery Elasticity After Switch From Epzicom to Truvada                                                                                                                                                                                                         |
| 488                                                                      | NR                             | 2009 | A Study Of Different Doses Of UK-453, 061 Plus Truvada Compared To Efavirenz Plus Truvada In Patients Who Have Not Been Previously Treated For HIV-1                                                                                                           |
| 489                                                                      | NR                             | 2009 | Clinical Study to Evaluate the Efficacy and Safety of Lopinavir/Ritonavir Monotherapy Versus Darunavir/Ritonavir Monotherapies as Simplification Switching Strategies of PI/NNRTI-Triple Therapy Based-Regimens                                                |
| 490                                                                      | NR                             | 2009 | Safety and Efficacy of Cobicistat-boosted Atazanavir Compared to Ritonavir-boosted Atazanavir in Combination With Emtricitabine/Tenofovir Disoproxil Fumarate in HIV-1 Infected, Antiretroviral Treatment-Naive Adults                                         |
| 491                                                                      | NR                             | 2009 | Switching From Protease Inhibitor (PI) to Etravirine in HIV-1 Infected Subjects With Viremia Suppression                                                                                                                                                       |
| 492                                                                      | NR                             | 2009 | A Trial of 2 Options for Second Line Combination Antiretroviral Therapy Following Virological Failure of a Standard Non-nucleoside Reverse Transcriptase Inhibitor (NNRTI)+2N(t)RTI First Line Regimen                                                         |
| 493                                                                      | NR                             | 2009 | BATAR: individuals Currently Taking Boosted Atazanavir as Part of an HIV Treatment Regimen Will be Evaluated to See if Substituting Raltegravir for Nucleoside Transcriptase Inhibitors Will be Safe and Well Tolerated                                        |
| 494                                                                      | NR                             | 2009 | Safety and Efficacy of Reduced Dose Efavirenz (EFV) With Standard Dose EFV Plus Two Nucleotide Reverse Transcriptase Inhibitors (N(t)RTI) in Antiretroviral-naïve HIV-infected Individuals                                                                     |
| 495                                                                      | NR                             | 2009 | Lopinavir/r Monotherapy Versus Abacavir/Lamivudine and Lopinavir/r for Limb Fat Recovery in Persons With Lipoatrophy                                                                                                                                           |
| 496                                                                      | NR                             | 2009 | Raltegravir Switch for Toxicity or Adverse Events                                                                                                                                                                                                              |
| 497                                                                      | NR                             | 2009 | Switching the Non-nucleoside Reverse Transcriptase Inhibitor (NNRTI) or Protease Inhibitor (PI) to Maraviroc in HIV Subjects                                                                                                                                   |
| 498                                                                      | NR                             | 2009 | A Pilot Study Of A Novel Treatment Regimen, Maraviroc + Ritonavir Boosted Atazanavir, In Treatment Naïve HIV-Infected Patients                                                                                                                                 |
| 499                                                                      | NR                             | 2009 | Study on the Antiviral Therapy and Immune Reconstitution of Chinese HIV/AIDS Patients                                                                                                                                                                          |
| 500                                                                      | NR                             | 2009 | Safety and Efficacy of ADAPTAVIR's Ability to Eliminate Treatment-Resistant Infectious Virus in Peripheral Blood Mononuclear Cells (PBMCs)                                                                                                                     |

**Table S4 – List of excluded studies by exclusion reason (continuation)**

| Studies excluded for not describing adverse events specifically in women |                                |      |                                                                                                                                                                                                                                 |
|--------------------------------------------------------------------------|--------------------------------|------|---------------------------------------------------------------------------------------------------------------------------------------------------------------------------------------------------------------------------------|
| Amount                                                                   | First author or research group | Year | Title                                                                                                                                                                                                                           |
| 501                                                                      | NR                             | 2009 | PENTA18: Pharmacokinetics, safety and efficacy of lopinavir/ritonavir tablets in combination antiretroviral therapy in human immunodeficiency virus-1 (HIV-1) infected children                                                 |
| 502                                                                      | NR                             | 2009 | Study to Compare the Safety and Anti-HIV Effect of GSK1265744 Versus Placebo in HIV-1 Infected Adults (ITZ112929)                                                                                                               |
| 503                                                                      | Palumbo                        | 2010 | Antiretroviral Treatment for Children with Peripartum Nevirapine Exposure                                                                                                                                                       |
| 504                                                                      | Hammer                         | 2010 | A randomized, placebo-controlled trial of abacavir intensification in HIV-1-infected adults with virologic suppression on a protease inhibitor-containing regimen                                                               |
| 505                                                                      | Cooper                         | 2010 | Maraviroc versus efavirenz, both in combination with zidovudine-lamivudine, for the treatment of antiretroviral-naïve subjects with CCR5-tropic HIV-1 infection                                                                 |
| 506                                                                      | Stellbrink                     | 2010 | Comparison of changes in bone density and turnover with abacavir-lamivudine versus tenofovir-emtricitabine in HIV-infected adults: 48-week results from the ASSERT study                                                        |
| 507                                                                      | Suleiman                       | 2010 | Vicriviroc in combination therapy with an optimized regimen for treatment-experienced subjects: 48-week results of the VICTOR-E1 phase 2 trial                                                                                  |
| 508                                                                      | Wilkin                         | 2010 | Three-year safety and efficacy of vicriviroc, a CCR5 antagonist, in HIV-1-infected treatment-experienced patients                                                                                                               |
| 509                                                                      | Yeh                            | 2010 | Vicriviroc and peripheral neuropathy: results from AIDS Clinical Trials Group 5211                                                                                                                                              |
| 510                                                                      | Josephson                      | 2010 | The relation between treatment outcome and efavirenz, atazanavir or lopinavir exposure in the NORTHIV trial of treatment-naïve HIV-1 infected patients                                                                          |
| 511                                                                      | Lennox                         | 2010 | Raltegravir versus Efavirenz regimens in treatment-naïve HIV-1-infected patients: 96-week efficacy, durability, subgroup, safety, and metabolic analyses                                                                        |
| 512                                                                      | Malan                          | 2010 | 96-week efficacy and safety of atazanavir, with and without ritonavir, in a HAART regimen in treatment-naïve patients                                                                                                           |
| 513                                                                      | Meynard                        | 2010 | Lopinavir/ritonavir monotherapy versus current treatment continuation for maintenance therapy of HIV-1 infection: the KALESOLO trial                                                                                            |
| 514                                                                      | Arribas                        | 2010 | The MONET trial: darunavir/ritonavir with or without nucleoside analogues, for patients with HIV RNA below 50 copies/ml                                                                                                         |
| 515                                                                      | Katlama                        | 2010 | Efficacy of darunavir/ritonavir maintenance monotherapy in patients with HIV-1 viral suppression: a randomized open-label, noninferiority trial, MONOI-ANRS 136                                                                 |
| 516                                                                      | Martínez                       | 2010 | Substitution of raltegravir for ritonavir-boosted protease inhibitors in HIV-infected patients: the SPIRAL study                                                                                                                |
| 517                                                                      | Pozniak                        | 2010 | Efficacy and safety of TMC278 in antiretroviral-naïve HIV-1 patients: week 96 results of a phase IIb randomized trial                                                                                                           |
| 518                                                                      | Squires                        | 2010 | Similar efficacy and tolerability of atazanavir compared with atazanavir/ritonavir, each with abacavir/lamivudine after initial suppression with abacavir/lamivudine plus ritonavir-boosted atazanavir in HIV-infected patients |
| 519                                                                      | Wester                         | 2010 | Non-nucleoside reverse transcriptase inhibitor outcomes among combination antiretroviral therapy-treated adults in Botswana                                                                                                     |
| 520                                                                      | Hodder                         | 2010 | Patient-reported outcomes in virologically suppressed, HIV-1-Infected subjects after switching to a simplified, single-tablet regimen of efavirenz, emtricitabine, and tenofovir DF                                             |
| 521                                                                      | Sprenger                       | 2010 | Abacavir/lamivudine/zidovudine maintenance after standard induction in antiretroviral therapy-naïve patients: FREE randomized trial interim results                                                                             |

**Table S4 – List of excluded studies by exclusion reason (continuation)**

| Studies excluded for not describing adverse events specifically in women |                                |      |                                                                                                                                                                                                                                                                                                      |
|--------------------------------------------------------------------------|--------------------------------|------|------------------------------------------------------------------------------------------------------------------------------------------------------------------------------------------------------------------------------------------------------------------------------------------------------|
| Amount                                                                   | First author or research group | Year | Title                                                                                                                                                                                                                                                                                                |
| 522                                                                      | Edén                           | 2010 | Differential effects of efavirenz, lopinavir/r, and atazanavir/r on the initial viral decay rate in treatment naïve HIV-1-infected patients                                                                                                                                                          |
| 523                                                                      | González-García                | 2010 | Short communication: Comparable safety and efficacy with once-daily versus twice-daily dosing of lopinavir/ritonavir tablets with emtricitabine + tenofovir DF in antiretroviral-naïve, HIV type 1-infected subjects: 96 week final results of the randomized trial M05-730                          |
| 524                                                                      | Miró                           | 2010 | Immune reconstitution in severely immunosuppressed antiretroviral-naïve HIV type 1-infected patients using a nonnucleoside reverse transcriptase inhibitor-based or a boosted protease inhibitor-based antiretroviral regimen: three-year results (The Advanz Trial): a randomized, controlled trial |
| 525                                                                      | Ghosn                          | 2010 | Unboosted atazanavir-based therapy maintains control of HIV type-1 replication as effectively as a ritonavir-boosted regimen                                                                                                                                                                         |
| 526                                                                      | Echeverría                     | 2010 | Similar antiviral efficacy and tolerability between efavirenz and lopinavir/ritonavir, administered with abacavir/lamivudine (Kivexa), in antiretroviral-naïve patients: a 48-week, multicentre, randomized study (Lake Study)                                                                       |
| 527                                                                      | Molina                         | 2010 | Once-daily atazanavir/ritonavir compared with twice-daily lopinavir/ritonavir, each in combination with tenofovir and emtricitabine, for management of antiretroviral-naïve HIV-1-infected patients: 96-week efficacy and safety results of the CASTLE study                                         |
| 528                                                                      | Munderi                        | 2010 | Nevirapine/zidovudine/lamivudine has superior immunological and virological responses not reflected in clinical outcomes in a 48-week randomized comparison with abacavir/zidovudine/lamivudine in HIV-infected Ugandan adults with low CD4 cell counts                                              |
| 529                                                                      | Pinola                         | 2010 | Lopinavir/ritonavir + tenofovir Dual Therapy versus Lopinavir/ritonavir-Based Triple Therapy in HIV-Infected Antiretroviral Naïve Subjects: the Kalead Study                                                                                                                                         |
| 530                                                                      | Post                           | 2010 | Randomized comparison of renal effects, efficacy, and safety with once-daily abacavir/lamivudine versus tenofovir/emtricitabine, administered with efavirenz, in antiretroviral-naïve, HIV-1-infected adults: 48-week results from the ASSERT study                                                  |
| 531                                                                      | Puls                           | 2010 | Efavirenz versus boosted atazanavir or zidovudine and abacavir in antiretroviral treatment-naïve, HIV-infected subjects: week 48 data from the Altair study                                                                                                                                          |
| 532                                                                      | Sierra-Madero                  | 2010 | Prospective, randomized, open label trial of efavirenz vs lopinavir/ritonavir in HIV+ treatment-naïve subjects with CD4+<200 cell/mm <sup>3</sup> in Mexico                                                                                                                                          |
| 533                                                                      | Winston                        | 2010 | Neuropsychiatric Adverse Events With Ritonavir-Boosted Darunavir Monotherapy in HIV-Infected Individuals: A Randomised Prospective Study                                                                                                                                                             |
| 534                                                                      | NR                             | 2010 | ALTAIR - Alternative Antiretroviral Strategies: a Comparison of Three Initial Regimens                                                                                                                                                                                                               |
| 535                                                                      | NR                             | 2010 | A phase 3 clinical trial to compare the safety and effectiveness of GSK1349572 and abacavir/lamivudine compared to Atripla over 96 weeks in patients with HIV infection who have not previously received treatment                                                                                   |
| 536                                                                      | NR                             | 2010 | Study to test a new drug dolutegravir vs. raltegravir for HIV patients who have never taken HIV medication                                                                                                                                                                                           |
| 537                                                                      | NR                             | 2010 | A phase II, double blind, exploratory, parallel-group, placebo-controlled clinical study to assess two dosing regimens of GSK2402968 for efficacy, safety, tolerability and pharmacokinetics in ambulant subjects with Duchenne muscular dystrophy                                                   |

**Table S4 – List of excluded studies by exclusion reason (continuation)**

| Studies excluded for not describing adverse events specifically in women |                                |      |                                                                                                                                                                                                                                                                |
|--------------------------------------------------------------------------|--------------------------------|------|----------------------------------------------------------------------------------------------------------------------------------------------------------------------------------------------------------------------------------------------------------------|
| Amount                                                                   | First author or research group | Year | Title                                                                                                                                                                                                                                                          |
| 538                                                                      | NR                             | 2010 | A randomised, open label, prospective study to assess two different therapeutic strategies following first treatment failure in HIV-1 infected subjects. ‘The First Failure Study’ : ‘FAST’ - The First Failure Study                                          |
| 539                                                                      | NR                             | 2010 | A randomised open-label study comparing the safety and efficacy of ritonavir boosted lopinavir and 2-3N(t)RTI backbone versus ritonavir boosted lopinavir and raltegravir in participants virologically failing first-line NNRTI/2N(t)RTI therapy: the SECOND  |
| 540                                                                      | NR                             | 2010 | A randomised, double-blind, placebo-controlled, clinical trial to compare the safety and efficacy of reduced dose efavirenz (EFV) with standard dose EFV plus two nucleotide reverse transcriptase inhibitors (N(t)RTI) in antiretroviral-naïve HIV-infected i |
| 541                                                                      | NR                             | 2010 | A prospective, randomised study to assess safety, changes in platelet reactivity, plasma cardiac biomarkers and metabolic parameters over 48 weeks in HIV-1 infected subjects undergoing a switch in antiretroviral therapy. - The St. Marys and The Mater Swi |
| 542                                                                      | NR                             | 2010 | Efficacy of atazanavir/ritonavir monotherapy as maintenance in patients with viral suppression. Randomized, open label non inferiority trial. (MODAt STUDY) - ND                                                                                               |
| 543                                                                      | NR                             | 2010 | Randomized multicenter study on security and efficacy of therapeutic switch to maraviroc + darunavir/ritonavir once daily in patients who are in triple antiretroviral regimen with three drugs belonging at least to one of the three historical classes and  |
| 544                                                                      | NR                             | 2010 | An open-label randomised two-year trial comparing two first-line regimens in HIV-infected antiretroviral naïve subjects: darunavir/r + tenofovir/emtricitabine vs. darunavir/r + raltegravir - NEAT 001/ANRS143                                                |
| 545                                                                      | NR                             | 2010 | Effectiveness of generic split adult tablets and paediatric fixed dose combination (FDC) of d4T/3TC/NVP in the treatment of HIV infected Malawian children                                                                                                     |
| 546                                                                      | NR                             | 2010 | Children with human immunodeficiency virus (HIV) in Africa - pharmacokinetics and acceptability/adherence of simple antiretroviral regimens (CHAPAS-3 trial)                                                                                                   |
| 547                                                                      | NR                             | 2010 | A Trial With TMC278-TIDP6-C222 for Continued TMC278 Access in Patients Infected With Human Immunodeficiency Virus-1                                                                                                                                            |
| 548                                                                      | NR                             | 2010 | Low Dose Atazanavir/r Versus Standard Dose Atazanavir/r (LASA)                                                                                                                                                                                                 |
| 549                                                                      | NR                             | 2010 | Study of Lopinavir/ Ritonavir and Lamivudine Versus Standard Therapy in Naïve HIV-1 Infected Subjects                                                                                                                                                          |
| 550                                                                      | NR                             | 2010 | Switching From Efavirenz to Atazanavir/ Ritonavir in HIV-infected Subjects With Good Virologic Suppression                                                                                                                                                     |
| 551                                                                      | NR                             | 2010 | Safety and Efficacy of COBI-boosted Atazanavir Versus Ritonavir-boosted Atazanavir Each Administered With Emtricitabine/Tenofovir Disoproxil Fumarate in HIV-1 Infected, Antiretroviral Treatment-Naïve Adults                                                 |
| 552                                                                      | NR                             | 2010 | Effect of Maraviroc (MCV) on the Immunological Recovery of HIV-1 Discordant Patients With CD4 Lymphocyte Counts Below 200 Cells/mm <sup>3</sup>                                                                                                                |
| 553                                                                      | NR                             | 2010 | Study to Evaluate the Safety and Efficacy of Stribild Versus Atripla in Human Immunodeficiency Virus, Type 1 (HIV-1) Infected, Antiretroviral Treatment-Naïve Adults                                                                                           |
| 554                                                                      | NR                             | 2010 | Post-prandial Lipid Effects of Raltegravir (RAL) vs Ritonavir -Boosted Darunavir (DRV-r) in Anti-retroviral Therapy (ART)- Naïve Adults or Adults Recommencing ART                                                                                             |
| 555                                                                      | NR                             | 2010 | A Simplification Study of Unboosted Reyataz With Epzicom (ASSURE)                                                                                                                                                                                              |

**Table S4 – List of excluded studies by exclusion reason (continuation)**

| Studies excluded for not describing adverse events specifically in women |                                |      |                                                                                                                                                                                                                                          |
|--------------------------------------------------------------------------|--------------------------------|------|------------------------------------------------------------------------------------------------------------------------------------------------------------------------------------------------------------------------------------------|
| Amount                                                                   | First author or research group | Year | Title                                                                                                                                                                                                                                    |
| 556                                                                      | NR                             | 2010 | Protease Inhibitor Monotherapy Versus Ongoing Triple-therapy in the Long Term Management of HIV Infection (PIVOT)                                                                                                                        |
| 557                                                                      | NR                             | 2010 | COMPARISM BETWEEN ONCE DAILY AND TWICE DAILY LPV/RTR CO-ADMINISTERED WITH TENOFOVIR AND EMTRICITOBIN AMONG HIV INFECTED PATIENTS DURING MUSLIM RAMADAN                                                                                   |
| 558                                                                      | NR                             | 2010 | A Study of GSK1349572 Versus Raltegravir (RAL) With Investigator Selected Background Regimen in Antiretroviral-Experienced, Integrase Inhibitor-Naive Adults                                                                             |
| 559                                                                      | Elgadi                         | 2011 | Boosted tipranavir versus darunavir in treatment-experienced patients: observational data from the randomized POTENT trial                                                                                                               |
| 560                                                                      | Gallien                        | 2011 | Efficacy and safety of raltegravir in treatment-experienced HIV-1-infected patients switching from enfuvirtide-based regimens: 48 week results of the randomized EASIER ANRS 138 trial                                                   |
| 561                                                                      | Harrison                       | 2011 | First-line antiretroviral therapy with a protease inhibitor versus non-nucleoside reverse transcriptase inhibitor and switch at higher versus low viral load in HIV-infected children: An open-label, randomised phase 2/3 trial         |
| 562                                                                      | Cahn                           | 2011 | Pilot, randomized study assessing safety, tolerability and efficacy of simplified LPV/r maintenance therapy in HIV patients on the 1 PI-based regimen                                                                                    |
| 563                                                                      | Cohen                          | 2011 | Rilpivirine versus efavirenz with two background nucleoside or nucleotide reverse transcriptase inhibitors in treatment-naive adults infected with HIV-1 (THRIVE): a phase 3, randomised, non-inferiority trial                          |
| 564                                                                      | Soliman                        | 2011 | Boosted protease inhibitors and the electrocardiographic measures of QT and PR durations                                                                                                                                                 |
| 565                                                                      | Ulbricht                       | 2011 | A Multicenter, Open Labeled, Randomized, Phase III Study Comparing Lopinavir/Ritonavir Plus Atazanavir to Lopinavir/Ritonavir Plus Zidovudine and Lamivudine in Naive HIV-1-Infected Patients: 48-Week Analysis of the LORAN Trial       |
| 566                                                                      | Vrouenraets                    | 2011 | Randomized comparison of metabolic and renal effects of saquinavir/r or atazanavir/r plus tenofovir/emtricitabine in treatment-naïve HIV-1-infected patients                                                                             |
| 567                                                                      | Li                             | 2011 | [Safety study of 52-week highly active antiretroviral therapy in 198 HIV/AIDS Chinese patients]                                                                                                                                          |
| 568                                                                      | Molina                         | 2011 | Rilpivirine versus efavirenz with tenofovir and emtricitabine in treatment-naïve adults infected with HIV-1 (ECHO): a phase 3 randomised double-blind active-controlled trial                                                            |
| 569                                                                      | Cahn                           | 2011 | Week 48 analysis of once-daily vs. twice-daily darunavir/ritonavir in treatment-experienced HIV-1-infected patients                                                                                                                      |
| 570                                                                      | Cohen                          | 2011 | Randomized, phase 2 evaluation of two single-tablet regimens elvitegravir/cobicistat/emtricitabine/tenofovir disoproxil fumarate versus efavirenz/emtricitabine/tenofovir disoproxil fumarate for the initial treatment of HIV infection |
| 571                                                                      | Elion                          | 2011 | Phase 2 study of cobicistat versus ritonavir each with once-daily atazanavir and fixed-dose emtricitabine/tenofovir df in the initial treatment of HIV infection                                                                         |
| 572                                                                      | Min                            | 2011 | Antiviral activity, safety, and pharmacokinetics/pharmacodynamics of dolutegravir as 10-day monotherapy in HIV-1-infected adults                                                                                                         |
| 573                                                                      | Gathe                          | 2011 | Efficacy and safety of nevirapine extended-release once daily versus nevirapine immediate-release twice-daily in treatment-naïve HIV-1-infected patients                                                                                 |

**Table S4 – List of excluded studies by exclusion reason (continuation)**

| Studies excluded for not describing adverse events specifically in women |                                |      |                                                                                                                                                                                                                                                                |
|--------------------------------------------------------------------------|--------------------------------|------|----------------------------------------------------------------------------------------------------------------------------------------------------------------------------------------------------------------------------------------------------------------|
| Amount                                                                   | First author or research group | Year | Title                                                                                                                                                                                                                                                          |
| 574                                                                      | Soriano                        | 2011 | Nevirapine versus atazanavir/ritonavir, each combined with tenofovir disoproxil fumarate/emtricitabine, in antiretroviral-naïve HIV-1 patients: the ARTEN Trial                                                                                                |
| 575                                                                      | Reynes                         | 2011 | Examination of noninferiority, safety, and tolerability of lopinavir/ritonavir and raltegravir compared with lopinavir/ritonavir and tenofovir/ emtricitabine in antiretroviral-naïve subjects: the progress study, 48-week results                            |
| 576                                                                      | Dejesus                        | 2011 | A randomised comparison of safety and efficacy of nevirapine vs. atazanavir/ritonavir combined with tenofovir/emtricitabine in treatment-naïve patients                                                                                                        |
| 577                                                                      | Podzamczar                     | 2011 | Lipid profiles for nevirapine vs. atazanavir/ritonavir, both combined with tenofovir disoproxil fumarate and emtricitabine over 48 weeks, in treatment-naïve HIV-1-infected patients (the ARTEN study)                                                         |
| 578                                                                      | Rasmussen                      | 2011 | Evaluation of cardiovascular biomarkers in HIV-infected patients switching to abacavir or tenofovir based therapy                                                                                                                                              |
| 579                                                                      | Rockstroh                      | 2011 | Long-term treatment with raltegravir or efavirenz combined with tenofovir/emtricitabine for treatment-naïve human immunodeficiency virus-1-infected patients: 156-week results from STARTMRK                                                                   |
| 580                                                                      | Maserati                       | 2011 | Once-a-day (QD) vs. twice-daily (BID) nevirapine as simplification in PI-treated patients after 2 mos. of BID induction                                                                                                                                        |
| 581                                                                      | Daar                           | 2011 | Atazanavir plus ritonavir or efavirenz as part of a 3-drug regimen for initial treatment of HIV-1                                                                                                                                                              |
| 582                                                                      | Honda                          | 2011 | Open-label randomized multicenter selection study of once daily antiretroviral treatment regimen comparing ritonavir-boosted atazanavir to efavirenz with fixed-dose abacavir and lamivudine                                                                   |
| 583                                                                      | NR                             | 2011 | A randomised, open-label study to evaluate the efficacy and safety of maraviroc (MVC) as a switch for either nucleoside or nucleotide analogue reverse transcriptase inhibitors (N(t)RTI) or boosted protease inhibitors (PI/r) in HIV-1 infected individuals  |
| 584                                                                      | NR                             | 2011 | Clinical study on Tolerability, pharmacodynamics and pharmacokinetics of multiple doses of Albuvirtide injection in HIV-infected patients                                                                                                                      |
| 585                                                                      | NR                             | 2011 | An Open-Label, Randomized Study Evaluating a Switch from a Regimen of Two Nucleoside Reverse Transcriptase Inhibitors plus any Third Agent to either a Regimen of Atazanavir/Ritonavir Once Daily and Raltegravir Twice Daily or to a Regimen of Atazanavir/Ri |
| 586                                                                      | NR                             | 2011 | EFFECT OF SWITCHING FROM NRTIS TO MARAVIROC ON NRTI-ASSOCIATED MITCHONDRIAL TOXICITY AND IMMUNE ACTIVATION                                                                                                                                                     |
| 587                                                                      | NR                             | 2011 | Study to assess the lipid-lowering effect of adding tenofovir/emtricitabine co-formulation vs placebo to HIV-1 infected subjects with dyslipidemia and sustained viral load suppression under monotherapy with ritonavir-boosted protease inhibitors           |
| 588                                                                      | NR                             | 2011 | This clinical research study will assess the effectiveness (how well it works), safety, tolerability (how well the body stands the drug) and blood levels of combined doses of BMS-663068, Raltegravir and Tenofovir                                           |
| 589                                                                      | NR                             | 2011 | A study to find out whether maraviroc given once daily is as effective as Truvada given once daily in treating HIV-infected patients never previously treated with maraviroc                                                                                   |
| 590                                                                      | NR                             | 2011 | PROTEA: a clinical trial comparing the efficacy of darunavir/ritonavir 800/100 mg monotherapy versus a triple combination therapy containing darunavir/ritonavir 800/100 mg and 2 nucleoside/nucleotide reverse transcriptase inhibitors in patients with unde |
| 591                                                                      | NR                             | 2011 | MARCH                                                                                                                                                                                                                                                          |

**Table S4 – List of excluded studies by exclusion reason (continuation)**

| Studies excluded for not describing adverse events specifically in women |                                |      |                                                                                                                                                                                                                                                                   |
|--------------------------------------------------------------------------|--------------------------------|------|-------------------------------------------------------------------------------------------------------------------------------------------------------------------------------------------------------------------------------------------------------------------|
| Amount                                                                   | First author or research group | Year | Title                                                                                                                                                                                                                                                             |
| 592                                                                      | NR                             | 2011 | This open label trial will recruit patients with HIV who are already receiving anti-HIV treatment which includes ritonavir and emtricitabine/tenofovir disoproxil fumarate (Truvada). Patients will be randomised to either remain on the same anti-HIV drugs     |
| 593                                                                      | NR                             | 2011 | A Phase 3B, Randomized, Open-label Study to Evaluate the Safety and Efficacy of a Single Tablet Regimen of Emtricitabine/Rilpivirine/Tenofovir Disoproxil Fumarate Compared with a Single Tablet Regimen of Efavirenz/Emtricitabine/Tenofovir Disoproxil Fumarate |
| 594                                                                      | Juan                           | 2011 | Study to Evaluate the Activity and Tolerability of Lopinavir/Ritonavir and Lamivudine Bitherapy in HIV Patients With Viral Suppression                                                                                                                            |
| 595                                                                      | Kirby                          | 2011 | Maraviroc Switch Collaborative Study                                                                                                                                                                                                                              |
| 596                                                                      | NR                             | 2011 | Study of MK-1972 in Human Immunodeficiency Virus (HIV)-1 Infected Participants Who Have Not Previously Received Antiretroviral Therapy (MK-1972-003)                                                                                                              |
| 597                                                                      | NR                             | 2011 | Efficacy, Safety, and Tolerability of Cenicriviroc (CVC) in Combination With Truvada or Sustiva Plus Truvada in HIV 1-infected, Antiretroviral Treatment-naïve, Adult Patients Infected With Only CCR5-tropic Virus                                               |
| 598                                                                      | NR                             | 2011 | Switch to Unboosted Atazanavir With Tenofovir Study                                                                                                                                                                                                               |
| 599                                                                      | NR                             | 2011 | DRIVESHAFT: darunavir/Ritonavir In HIV-infected Virologically-suppressed Experienced Subjects                                                                                                                                                                     |
| 600                                                                      | NR                             | 2011 | Pediatric Study for Appropriate Dose of Ritonavir Boosted Lopinavir in Thai HIV-infected Children (PEARL)                                                                                                                                                         |
| 601                                                                      | NR                             | 2011 | Effects of Switching Efavirenz to Raltegravir on Vascular Function and Bone Markers in HIV-infected Patients                                                                                                                                                      |
| 602                                                                      | NR                             | 2011 | Study to Evaluate the Safety and Efficacy of a Single Tablet Regimen of Emtricitabine/Rilpivirine/Tenofovir Disoproxil Fumarate Compared With a Single Tablet Regimen of Efavirenz/Emtricitabine/Tenofovir Disoproxil Fumarate in HIV-1 Infected, Antiretroviral  |
| 603                                                                      | NR                             | 2011 | Immuno-stimulation With Maraviroc Combined to Antiretroviral Therapy in Advanced Late Diagnosed HIV-1 Infected Patients                                                                                                                                           |
| 604                                                                      | NR                             | 2011 | Clinical Trial of Brain-Penetrating HIV Drugs to Prevent Cognitive Impairment in China                                                                                                                                                                            |
| 605                                                                      | NR                             | 2011 | Atazanavir/Ritonavir, Once Daily + Raltegravir, Twice Daily, Switch Study in HIV-1—Infected Patients                                                                                                                                                              |
| 606                                                                      | NR                             | 2011 | Study to Evaluate Switching From Regimens Consisting of a Ritonavir-boosted Protease Inhibitor Plus Emtricitabine/Tenofovir Fixed-Dose Combination to the Elvitegravir/Cobicistat/Emtricitabine/Tenofovir DF Single-Tablet Regimen in Virologically Suppressed    |
| 607                                                                      | NR                             | 2011 | Study to Evaluate Switching From Regimens Consisting of a Nonnucleoside Reverse Transcriptase Inhibitor Plus Emtricitabine and Tenofovir DF to the Elvitegravir/Cobicistat/Emtricitabine/Tenofovir DF Single-Tablet Regimen in Virologically Suppressed, HIV-1    |
| 608                                                                      | NR                             | 2011 | Safety and Efficacy of E/C/F/TAF (Genvoya®) Versus E/C/F/TDF (Stribild®) in HIV-1 Infected, Antiretroviral Treatment-Naïve Adults                                                                                                                                 |
| 609                                                                      | NR                             | 2011 | Cobicistat-containing Highly Active Antiretroviral Regimens in HIV-1 Infected Patients With Mild to Moderate Renal Impairment                                                                                                                                     |
| 610                                                                      | NR                             | 2011 | A Study to Compare Brachial Artery Reactivity and Cardiovascular Risk of a Treatment Simplification by Darunavir/Ritonavir (DRV/r) 800/100 mg Versus a Triple Combination Therapy Containing DRV/r in HIV-1 Infected Patients                                     |



**Table S4 – List of excluded studies by exclusion reason (continuation)**

| Studies excluded for not describing adverse events specifically in women |                                |      |                                                                                                                                                                                                                                                                                                      |
|--------------------------------------------------------------------------|--------------------------------|------|------------------------------------------------------------------------------------------------------------------------------------------------------------------------------------------------------------------------------------------------------------------------------------------------------|
| Amount                                                                   | First author or research group | Year | Title                                                                                                                                                                                                                                                                                                |
| 611                                                                      | NR                             | 2011 | Dolutegravir Compared to Darunavir/Ritonavir , Each in Combination With Dual Nucleoside Reverse Transcriptase Inhibitors (NRTIs) in ART-naïve Subjects                                                                                                                                               |
| 612                                                                      | NR                             | 2011 | Antiretroviral Treatment Strategies in Relation to Adherence, Resistance and Virological Treatment Failure                                                                                                                                                                                           |
| 613                                                                      | NR                             | 2011 | A PHASE IIB RANDOMIZED, CONTROLLED, PARTIALLY-BLINDED TRIAL TO INVESTIGATE SAFETY, EFFICACY AND DOSE-RESPONSE OF BMS-663068 IN TREATMENT-EXPERIENCED HIV-1 SUBJECTS, FOLLOWED BY AN OPEN-LABEL PERIOD ON THE RECOMMENDED DOSE                                                                        |
| 614                                                                      | NR                             | 2011 | A PHASE 3, RANDOMIZED, OPEN LABEL, CONTROLLED STUDY OF LOPINAVIR/RITONAVIR AND LAMIVUDINE VERSUS STANDARD THERAPY IN NAÏVE HIV-1 INFECTED SUBJECTS                                                                                                                                                   |
| 615                                                                      | NR                             | 2011 | Investigation of The Effect of Cenicriviroc (CVC) Plus FTC/TDF on Cardiovascular Disease Risk Factors                                                                                                                                                                                                |
| 616                                                                      | NR                             | 2011 | Effects of Intensive cART During Acute/Early HIV Infection                                                                                                                                                                                                                                           |
| 617                                                                      | NR                             | 2011 | A Study to Assess Dolutegravir in HIV-infected Subjects With Treatment Failure on an Integrase Inhibitor Containing Regimen                                                                                                                                                                          |
| 618                                                                      | NR                             | 2011 | A Trial Comparing GSK1349572 50mg Plus Abacavir/Lamivudine Once Daily to Atripla (Also Called The SINGLE Trial)                                                                                                                                                                                      |
| 619                                                                      | DeJesus                        | 2012 | Co-formulated elvitegravir, cobicistat, emtricitabine, and tenofovir disoproxil fumarate versus ritonavir-boosted atazanavir plus co-formulated emtricitabine and tenofovir disoproxil fumarate for initial treatment of HIV-1 infection: a randomised, double-blind, phase 3, non-inferiority trial |
| 620                                                                      | Aberg                          | 2012 | Metabolic effects of darunavir/ritonavir versus atazanavir/ritonavir in treatment-naïve, HIV type 1-infected subjects over 48 weeks                                                                                                                                                                  |
| 621                                                                      | Albini                         | 2012 | A randomized, pilot trial to evaluate glomerular filtration rate by creatinine or cystatin C in naïve HIV-infected patients after tenofovir/emtricitabine in combination with atazanavir/ritonavir or efavirenz                                                                                      |
| 622                                                                      | Arasteh                        | 2012 | Twenty-four-week efficacy and safety of switching virologically suppressed HIV-1-infected patients from nevirapine immediate release 200 mg twice daily to nevirapine extended release 400 mg once daily (TRANxITION)                                                                                |
| 623                                                                      | Arribas                        | 2012 | The MONET trial: week 144 analysis of the efficacy of darunavir/ritonavir (DRV/r) monotherapy versus DRV/r plus two nucleoside reverse transcriptase inhibitors, for patients with viral load < 50 HIV-1 RNA copies/mL at baseline                                                                   |
| 624                                                                      | Sax                            | 2012 | Co-formulated elvitegravir, cobicistat, emtricitabine, and tenofovir versus co-formulated efavirenz, emtricitabine, and tenofovir for initial treatment of HIV-1 infection: a randomised, double-blind, phase 3 trial, analysis of results after 48 weeks                                            |
| 625                                                                      | Lambert-Niclot                 | 2012 | Long-term efficacy of darunavir/ritonavir monotherapy in patients with hiv-1 viral suppression: week 96 results from the MONOI ANRS 136 study                                                                                                                                                        |
| 626                                                                      | Molina                         | 2012 | Efficacy and safety of once daily elvitegravir versus twice daily raltegravir in treatment-experienced patients with HIV-1 receiving a ritonavir-boosted protease inhibitor: randomised, double-blind, phase 3, non-inferiority study                                                                |

**Table S4 – List of excluded studies by exclusion reason (continuation)**

| Studies excluded for not describing adverse events specifically in women |                                |      |                                                                                                                                                                                                                                                                |
|--------------------------------------------------------------------------|--------------------------------|------|----------------------------------------------------------------------------------------------------------------------------------------------------------------------------------------------------------------------------------------------------------------|
| Amount                                                                   | First author or research group | Year | Title                                                                                                                                                                                                                                                          |
| 627                                                                      | Skiest                         | 2012 | Efficacy and safety of switching suppressed patients with elevated triglycerides from lopinavir/ritonavir or fosamprenavir/ritonavir to atazanavir/ritonavir or darunavir/ritonavir based therapy: the LARD study                                              |
| 628                                                                      | Curran                         | 2012 | Body composition changes after switching from protease inhibitors to raltegravir: SPIRAL-LIP substudy                                                                                                                                                          |
| 629                                                                      | Curran                         | 2012 | Changes in body composition and mitochondrial DNA in HIV-1-infected patients switching to fixed-dose abacavir/lamivudine or tenofovir/emtricitabine: a substudy of the BICOMBO trial                                                                           |
| 630                                                                      | Llibre                         | 2012 | Treatment intensification with raltegravir in subjects with sustained HIV-1 viraemia suppression: a randomized 48-week study                                                                                                                                   |
| 631                                                                      | Moyle                          | 2012 | A randomized comparative 96-week trial of boosted atazanavir versus continued boosted protease inhibitor in HIV-1 patients with abdominal adiposity                                                                                                            |
| 632                                                                      | Bánhegyi                       | 2012 | Week 96 efficacy, virology and safety of darunavir/r versus lopinavir/r in treatment-experienced patients in TITAN                                                                                                                                             |
| 633                                                                      | Gotti                          | 2012 | Increase in standard cholesterol and large HDL particle subclasses in antiretroviral-naïve patients prescribed efavirenz compared to atazanavir/ritonavir                                                                                                      |
| 634                                                                      | Kozal                          | 2012 | A nucleoside- and ritonavir-sparing regimen containing atazanavir plus raltegravir in antiretroviral treatment-naïve HIV-infected patients: SPARTAN study results                                                                                              |
| 635                                                                      | Squires                        | 2012 | ARIES 144 week results: durable virologic suppression in HIV-infected patients simplified to unboosted atazanavir/abacavir/lamivudine                                                                                                                          |
| 636                                                                      | Gotuzzo                        | 2012 | Sustained efficacy and safety of raltegravir after 5 years of combination antiretroviral therapy as initial treatment of HIV-1 infection: final results of a randomized, controlled, phase II study (Protocol 004)                                             |
| 637                                                                      | Della Negra                    | 2012 | A randomized study of tenofovir disoproxil fumarate in treatment-experienced HIV-1 infected adolescents                                                                                                                                                        |
| 638                                                                      | Oforokun                       | 2012 | A switch in therapy to a reverse transcriptase inhibitor sparing combination of lopinavir/ritonavir and raltegravir in virologically suppressed HIV-infected patients: a pilot randomized trial to assess efficacy and safety profile: the KITE study          |
| 639                                                                      | Phanuphak                      | 2012 | A 72-week randomized study of the safety and efficacy of a stavudine to zidovudine switch at 24 weeks compared to zidovudine or tenofovir disoproxil fumarate when given with lamivudine and nevirapine                                                        |
| 640                                                                      | Rasmussen                      | 2012 | Comparison of bone and renal effects in HIV-infected adults switching to abacavir or tenofovir based therapy in a randomized trial                                                                                                                             |
| 641                                                                      | NR                             | 2012 | The Efavirenz (EFV) central nervous system exposure sub-study                                                                                                                                                                                                  |
| 642                                                                      | NR                             | 2012 | A randomised, double-blind, placebo-controlled, clinical trial to compare the safety and efficacy of reduced dose efavirenz (EFV) with standard dose EFV plus 2N(t)RTI in antiretroviral-naïve HIV-infected individuals over 96 weeks. Encore1 intensive pharm |
| 643                                                                      | NR                             | 2012 | The Neurocognitive Sub Study of Encore1: a Randomised, Double-Blind, Placebo-Controlled, Clinical Trial to Compare the Safety and Efficacy of Reduced Dose Efavirenz (EFV) With Standard Dose EFV Plus 2N(t)RTI in Antiretroviral-naïve HIV-Infected Individua |
| 644                                                                      | NR                             | 2012 | Safety, Efficacy and Dose response study of BMS-986001 in subjects with HIV-1 Infection who are treatment-naïve                                                                                                                                                |
| 645                                                                      | NR                             | 2012 | A clinical trial to compare brain function and neurocognitive performance in antiretroviral treatments with different levels of penetration in the central nervous system                                                                                      |

**Table S4 – List of excluded studies by exclusion reason (continuation)**

| Studies excluded for not describing adverse events specifically in women |                                |      |                                                                                                                                                                                                                                                                 |
|--------------------------------------------------------------------------|--------------------------------|------|-----------------------------------------------------------------------------------------------------------------------------------------------------------------------------------------------------------------------------------------------------------------|
| Amount                                                                   | First author or research group | Year | Title                                                                                                                                                                                                                                                           |
| 646                                                                      | NR                             | 2012 | This open label trial will recruit patients with HIV who are already receiving anti-HIV treatment which includes a Non-nucleoside Reverse Transcriptase Inhibitor (NNRTI) and emtricitabine/tenofovir disoproxil fumarate (Truvada). Patients will be randomis  |
| 647                                                                      | NR                             | 2012 | Safety and efficacy of switching a stable combined antiretroviral therapeutic regimen to atazanavir with ritonavir plus lamivudine in treatment experienced HIV positive patients with full and stable virological suppression                                  |
| 648                                                                      | NR                             | 2012 | Study to test a new drug dolutegravir vs. darunavir+ritonavir for HIV patients who have never taken HIV medication                                                                                                                                              |
| 649                                                                      | NR                             | 2012 | A Multicentre Trial of Second-line Antiretroviral Treatment Strategies in African Adults Using Atazanavir or Lopinavir/Ritonavir                                                                                                                                |
| 650                                                                      | NR                             | 2012 | A Clinical Trial Comparing the Efficacy of Darunavir/Ritonavir Monotherapy Versus a Triple Combination Therapy Containing Darunavir/Ritonavir and 2 Nucleoside/Nucleotide Reverse Transcriptase Inhibitors in Patients With Undetectable Plasma HIV-1 RNA on Cu |
| 651                                                                      | NR                             | 2012 | MARCH Renal Substudy                                                                                                                                                                                                                                            |
| 652                                                                      | NR                             | 2012 | Open-Label Study Comparing Efficacy and Safety of ATV/RTV+3TC With ATV/RTV+TDF/FTC in HIV-Infected, Treatment Naïve Subjects, Followed by Treatment With ATV/RTV+3TC                                                                                            |
| 653                                                                      | NR                             | 2012 | The Neurocognitive Sub-study of Encore1                                                                                                                                                                                                                         |
| 654                                                                      | NR                             | 2012 | Safety of Reduced Dose Zidovudine (AZT) Compared With Standard Dose AZT in Antiretroviral-naïve HIV-infected Patients                                                                                                                                           |
| 655                                                                      | NR                             | 2012 | A Dose-Ranging Study to Compare Doravirine (MK-1439) Plus TRUVADA® Versus Efavirenz Plus TRUVADA® in Human Immunodeficiency Virus (HIV)-1 Infected Participants (MK-1439-007)                                                                                   |
| 656                                                                      | NR                             | 2012 | Differences Between Stavudine and Tenofovir Each Combined With Lamivudine and Efavirenz in SA HIV-infected Patients                                                                                                                                             |
| 657                                                                      | NR                             | 2012 | Raltegravir-based Antiretroviral Therapy for Resistant HIV-1 Infection                                                                                                                                                                                          |
| 658                                                                      | NR                             | 2012 | Study Assessing Dolutegravir in HIV-1 Infected Subjects With Virus Resistant to Raltegravir and/or Elivitegravir                                                                                                                                                |
| 659                                                                      | NR                             | 2012 | Safety and Efficacy of E/C/F/TDF Versus RTV-Boosted ATV Plus FTC/TDF in HIV-1 Infected, Antiretroviral Treatment-Naïve Women                                                                                                                                    |
| 660                                                                      | NR                             | 2012 | D/C/F/TAF Versus COBI-boosted DRV Plus FTC/TDF in HIV-1 Infected, Antiretroviral Treatment Naïve Adults                                                                                                                                                         |
| 661                                                                      | NR                             | 2012 | A Clinical Trial Comparing the Efficacy of Tenofovir Disoproxil Fumarate/Emtricitabine/Rilpivirine (TDF/FTC/RPV) Versus TDF/FTC/Efavirenz (TDF/FTC/EFV) in Patients With Undetectable Plasma HIV-1 RNA on Current First-line Treatment                          |
| 662                                                                      | NR                             | 2012 | A Study to Compare Efficacy in Terms of Plasma HIV-1 RNA Between 2 Fixed Dose Combinations After a Switch in Fully Suppressed Patients                                                                                                                          |
| 663                                                                      | NR                             | 2012 | STALEO                                                                                                                                                                                                                                                          |
| 664                                                                      | NR                             | 2012 | A Safety and Efficacy Study of Amdoxovir in HIV-1 Treatment-experienced Subjects                                                                                                                                                                                |
| 665                                                                      | Gupta                          | 2013 | Effects of switching from efavirenz to raltegravir on endothelial function, bone mineral metabolism, inflammation, and renal function: a randomized, controlled trial                                                                                           |
| 666                                                                      | Reynes                         | 2013 | Lopinavir/ritonavir combined with raltegravir or tenofovir/emtricitabine in antiretroviral-naïve subjects: 96-week results of the PROGRESS study                                                                                                                |

**Table S4 – List of excluded studies by exclusion reason (continuation)**

| Studies excluded for not describing adverse events specifically in women |                                |      |                                                                                                                                                                                                                                                                                                                        |
|--------------------------------------------------------------------------|--------------------------------|------|------------------------------------------------------------------------------------------------------------------------------------------------------------------------------------------------------------------------------------------------------------------------------------------------------------------------|
| Amount                                                                   | First author or research group | Year | Title                                                                                                                                                                                                                                                                                                                  |
| 667                                                                      | Moyle                          | 2013 | 96-Week results of abacavir/lamivudine versus tenofovir/emtricitabine, plus efavirenz, in antiretroviral-naive, HIV-1-infected adults: ASSERT study                                                                                                                                                                    |
| 668                                                                      | Guaraldi                       | 2013 | Randomized trial to evaluate cardiometabolic and endothelial function in patients with plasma HIV-1 RNA suppression switching to darunavir/ritonavir with or without nucleoside analogues                                                                                                                              |
| 669                                                                      | Arathoon                       | 2013 | Effects of once-daily darunavir/ritonavir versus lopinavir/ritonavir on metabolic parameters in treatment-naïve HIV-1-infected patients at week 96: ARTEMIS                                                                                                                                                            |
| 670                                                                      | Elion                          | 2013 | A randomized phase 3 study comparing once-daily elvitegravir with twice-daily raltegravir in treatment-experienced subjects with HIV-1 infection: 96-week results                                                                                                                                                      |
| 671                                                                      | Huang                          | 2013 | Bone mineral density effects of randomized regimen and nucleoside reverse transcriptase inhibitor selection from ACTG A5142                                                                                                                                                                                            |
| 672                                                                      | Hunt                           | 2013 | The immunologic effects of maraviroc intensification in treated HIV-1-infected individuals with incomplete CD4+ T-cell recovery: a randomized trial                                                                                                                                                                    |
| 673                                                                      | Bernardino                     | 2013 | Switching to lopinavir/ritonavir with or without abacavir/lamivudine in lipotrophic patients treated with zidovudine/abacavir/lamivudine                                                                                                                                                                               |
| 674                                                                      | Bonjoch                        | 2013 | Switching the third drug of antiretroviral therapy to maraviroc in aviraemic subjects: a pilot, prospective, randomized clinical trial                                                                                                                                                                                 |
| 675                                                                      | Boyd                           | 2013 | Ritonavir-boosted lopinavir plus nucleoside or nucleotide reverse transcriptase inhibitors versus ritonavir-boosted lopinavir plus raltegravir for treatment of HIV-1 infection in adults with virological failure of a standard first-line ART regimen (SECOND-LINE): a randomised, open-label, non-inferiority study |
| 676                                                                      | Cahn                           | 2013 | Dolutegravir versus raltegravir in antiretroviral-experienced, integrase-inhibitor-naïve adults with HIV: week 48 results from the randomised, double-blind, non-inferiority SAILING study                                                                                                                             |
| 677                                                                      | Campo                          | 2013 | SWIFT: prospective 48-week study to evaluate efficacy and safety of switching to emtricitabine/tenofovir from lamivudine/abacavir in virologically suppressed HIV-1 infected patients on a boosted protease inhibitor containing antiretroviral regimen                                                                |
| 678                                                                      | Cotter                         | 2013 | Impact of switching from zidovudine to tenofovir disoproxil fumarate on bone mineral density and markers of bone metabolism in virologically suppressed HIV-1 infected patients; a substudy of the PREPARE study                                                                                                       |
| 679                                                                      | Walmsley                       | 2013 | Dolutegravir plus abacavir-lamivudine for the treatment of HIV-1 infection                                                                                                                                                                                                                                             |
| 680                                                                      | Kumar                          | 2013 | Evaluation of cardiovascular biomarkers in a randomized trial of fosamprenavir/ritonavir vs. efavirenz with abacavir/lamivudine in underrepresented, antiretroviral-naïve, HIV-infected patients (SUPPORT): 96-week results                                                                                            |
| 681                                                                      | Martin                         | 2013 | Bone mineral density in HIV participants randomized to raltegravir and lopinavir/ritonavir compared with standard second line therapy                                                                                                                                                                                  |
| 682                                                                      | Rockstroh                      | 2013 | A randomized, double-blind comparison of coformulated elvitegravir/cobicistat/emtricitabine/tenofovir DF vs ritonavir-boosted atazanavir plus coformulated emtricitabine and tenofovir DF for initial treatment of HIV-1 infection: analysis of week 96 results                                                        |
| 683                                                                      | Rockstroh                      | 2013 | Durable efficacy and safety of raltegravir versus efavirenz when combined with tenofovir/emtricitabine in treatment-naïve HIV-1-infected patients: final 5-year results from STARTMRK                                                                                                                                  |

**Table S4 – List of excluded studies by exclusion reason (continuation)**

| Studies excluded for not describing adverse events specifically in women |                                |      |                                                                                                                                                                                                                                                                |
|--------------------------------------------------------------------------|--------------------------------|------|----------------------------------------------------------------------------------------------------------------------------------------------------------------------------------------------------------------------------------------------------------------|
| Amount                                                                   | First author or research group | Year | Title                                                                                                                                                                                                                                                          |
| 684                                                                      | Zolopa                         | 2013 | A randomized double-blind comparison of coformulated elvitegravir/cobicistat/emtricitabine/tenofovir disoproxil fumarate versus efavirenz/emtricitabine/tenofovir disoproxil fumarate for initial treatment of HIV-1 infection: analysis of week 96 results    |
| 685                                                                      | Andersson                      | 2013 | Lopinavir/ritonavir, atazanavir/ritonavir, and efavirenz in antiretroviral-naïve HIV-1-infected individuals over 144 weeks: An open-label randomized controlled trial                                                                                          |
| 686                                                                      | Nishijima                      | 2013 | Switching tenofovir/emtricitabine plus lopinavir/r to raltegravir plus Darunavir/r in patients with suppressed viral load did not result in improvement of renal function but could sustain viral suppression: a randomized multicenter trial                  |
| 687                                                                      | Nishijima                      | 2013 | Abacavir/lamivudine versus tenofovir/emtricitabine with atazanavir/ritonavir for treatment-naïve Japanese patients with HIV-1 infection: a randomized multicenter trial                                                                                        |
| 688                                                                      | Orkin                          | 2013 | Final 192-week efficacy and safety of once-daily darunavir/ritonavir compared with lopinavir/ritonavir in HIV-1-infected treatment-naïve patients in the ARTEMIS trial                                                                                         |
| 689                                                                      | Raffi                          | 2013 | Once-daily dolutegravir versus twice-daily raltegravir in antiretroviral-naïve adults with HIV-1 infection (SPRING-2 study): 96 week results from a randomised, double-blind, non-inferiority trial                                                            |
| 690                                                                      | Raffi                          | 2013 | Once-daily dolutegravir versus raltegravir in antiretroviral-naïve adults with HIV-1 infection: 48 week results from the randomised, double-blind, non-inferiority SPRING-2 study                                                                              |
| 691                                                                      | Ribera                         | 2013 | Impact of switching from zidovudine/lamivudine to tenofovir/emtricitabine on lipoatrophy: the RECOMB study                                                                                                                                                     |
| 692                                                                      | NR                             | 2013 | Pharmacokinetic Study of Albuvirtide and Lopinavir/Ritonavir in HIV-infected Patients                                                                                                                                                                          |
| 693                                                                      | NR                             | 2013 | A Trial of Observed Long-acting, Anti-HIV Treatment With a Monoclonal CCR5 Antibody (PRO 140) as an Adjunct to a New, Optimized, Oral Antiretroviral Regimen in HIV-infected Injection Drug Users With Viral Rebound and Documented Poor Adherence             |
| 694                                                                      | NR                             | 2013 | Antiretroviral treatment with maraviroc plus ritonavir-boosted darunavir for early salvage therapy                                                                                                                                                             |
| 695                                                                      | NR                             | 2013 | STUDY TO ASSESS CHANGES IN BONE DENSITY OF THE SWITCH FROM PROTEASE INHIBITORS TO DOLUTEGRAVIR IN HIV-1-INFECTED SUBJECTS WITH LOW BONE MINERAL DENSITY                                                                                                        |
| 696                                                                      | NR                             | 2013 | Clinical research study involving an experimental combination medication called EVG/COBI/FTC/TDF. This is 1 pill containing 2 experimental medications, EVG and COBI, plus 2 medications already approved for the treatment of HIV-1 infection, FTC and TDF. I |
| 697                                                                      | NR                             | 2013 | PROBE TRIAL proof-of-concept study on the use of rilpivirine as substitutive agent for the HAART nucleosidic backbone in virologic suppressed patients                                                                                                         |
| 698                                                                      | NR                             | 2013 | Study to compare a standard HIV regimen with dolutegravir/abacavir/lamivudine in women                                                                                                                                                                         |
| 699                                                                      | NR                             | 2013 | Study investigating a new medicine - MK-1439 in patients diagnosed with HIV-1 without previous treatment for this disease. The study has 2 parts and neither the doctor or patient will know the treatment group. All the patients will be treated with Truvad |
| 700                                                                      | NR                             | 2013 | A study is to see if HIV-1 positive subjects currently taking an antiretroviral (ARV) regimen consisting of EVG/COBI/FTC/TDF (E/C/F/TDF) STR, Atripla® (also known as Sustiva®), cobicistat and atazanavir with Truvada® or ritonavir and atazanavir with Truv |

**Table S4 – List of excluded studies by exclusion reason (continuation)**

| Studies excluded for not describing adverse events specifically in women |                                |      |                                                                                                                                                                                                                                                                         |
|--------------------------------------------------------------------------|--------------------------------|------|-------------------------------------------------------------------------------------------------------------------------------------------------------------------------------------------------------------------------------------------------------------------------|
| Amount                                                                   | First author or research group | Year | Title                                                                                                                                                                                                                                                                   |
| 701                                                                      | NR                             | 2013 | Compare the Efficacy and Safety of Raltegravir Versus Efavirenz Combination Therapy in Treatment-naïve HIV-1 Patients                                                                                                                                                   |
| 702                                                                      | NR                             | 2013 | A Prospective, Open-label Trial of Two ABC/3TC Based Regimens in Late Presenter naïve Patients (CD4 <200 Cells/ $\mu$ L)                                                                                                                                                |
| 703                                                                      | NR                             | 2013 | Virological and Immunological Safety of a Dose Reduction Strategy Antiretroviral Regimen With Efavirenz / Tenofovir / Emtricitabine                                                                                                                                     |
| 704                                                                      | NR                             | 2013 | Evaluation of a Maintenance Strategy With Protease Inhibitors With or Without Lamivudine in Virologically Suppressed HIV Patients on Second Line Antiretroviral Treatment in Africa                                                                                     |
| 705                                                                      | NR                             | 2013 | Study to Evaluate the Safety and Efficacy of E/C/F/TAF (Genvoya®) Versus E/C/F/TDF (Stribild®) in HIV-1 Positive, Antiretroviral Treatment-Naive Adults                                                                                                                 |
| 706                                                                      | NR                             | 2013 | Multicentre Study To Assess Changes In Bone Mineral Density Of The Switch From Protease Inhibitors To Dolutegravir In HIV-1-Infected Subjects With Low Bone Mineral Density                                                                                             |
| 707                                                                      | NR                             | 2013 | Reduction of EARly mortaLITY in HIV-infected Adults and Children Starting Antiretroviral Therapy                                                                                                                                                                        |
| 708                                                                      | NR                             | 2013 | Efficacy Study of Different Laboratory Management Strategies and Drug Regimens in HIV-infected Children in Africa                                                                                                                                                       |
| 709                                                                      | NR                             | 2013 | HAART study                                                                                                                                                                                                                                                             |
| 710                                                                      | NR                             | 2013 | Rilpivirine Food PK Study                                                                                                                                                                                                                                               |
| 711                                                                      | NR                             | 2013 | A Study to Determine Safety and Efficacy of Dolutegravir/Abacavir/Lamivudine (DTG/ABC/3TC) in Human Immunodeficiency Virus (HIV)-1 Infected Antiretroviral Therapy (ART) Naïve Women (ARIA)                                                                             |
| 712                                                                      | NR                             | 2013 | Study of Safety and Pharmacokinetics in Healthy Volunteers and Safety, Tolerability and Antiviral Activity of VM-1500 in Patients With Human Immunodeficiency Virus-1 Infection                                                                                         |
| 713                                                                      | Echeverría                     | 2014 | Randomised study to assess the efficacy and safety of once-daily etravirine-based regimen as a switching strategy in HIV-infected patients receiving a protease inhibitor-containing regimen. Etraswitch study                                                          |
| 714                                                                      | Fabbiani                       | 2014 | Safety and efficacy of treatment switch to raltegravir plus tenofovir/emtricitabine or abacavir/lamivudine in patients with optimal virological control: 48-week results from a randomized pilot study (Raltegravir Switch for Toxicity or Adverse Events, RASTA Study) |
| 715                                                                      | Gianotti                       | 2014 | Monotherapy with lopinavir/ritonavir versus standard of care in HIV-infected patients virologically suppressed while on treatment with protease inhibitor-based regimens: results from the MoLo study                                                                   |
| 716                                                                      | Castagna                       | 2014 | Simplification to atazanavir/ritonavir monotherapy for HIV-1 treated individuals on virological suppression: 48-week efficacy and safety results                                                                                                                        |
| 717                                                                      | Cohen                          | 2014 | Week 48 results from a randomized clinical trial of rilpivirine/emtricitabine/tenofovir disoproxil fumarate vs. efavirenz/emtricitabine/tenofovir disoproxil fumarate in treatment-naïve HIV-1-infected adults                                                          |
| 718                                                                      | Palella                        | 2014 | Simplification to rilpivirine/emtricitabine/tenofovir disoproxil fumarate from ritonavir-boosted protease inhibitor antiretroviral therapy in a randomized trial of HIV-1 RNA-suppressed participants                                                                   |
| 719                                                                      | Landman                        | 2014 | Evaluation of four tenofovir-containing regimens as first-line treatments in Cameroon and Senegal: the ANRS 12115 DAYANA Trial                                                                                                                                          |
| 720                                                                      | Moyle                          | 2014 | Changes in biomarkers in HIV-1-infected treatment-naïve patients treated with tenofovir DF/emtricitabine plus atazanavir/ritonavir or lopinavir/ritonavir for 96 weeks: the CASTLE biomarker substudy                                                                   |

**Table S4 – List of excluded studies by exclusion reason (continuation)**

| Studies excluded for not describing adverse events specifically in women |                                |      |                                                                                                                                                                                                                                                                                                                                   |
|--------------------------------------------------------------------------|--------------------------------|------|-----------------------------------------------------------------------------------------------------------------------------------------------------------------------------------------------------------------------------------------------------------------------------------------------------------------------------------|
| Amount                                                                   | First author or research group | Year | Title                                                                                                                                                                                                                                                                                                                             |
| 721                                                                      | Sax                            | 2014 | Tenofovir alafenamide vs. tenofovir disoproxil fumarate in single tablet regimens for initial HIV-1 therapy: a randomized phase 2 study                                                                                                                                                                                           |
| 722                                                                      | Arribas                        | 2014 | Simplification to coformulated elvitegravir, cobicistat, emtricitabine, and tenofovir versus continuation of ritonavir-boosted protease inhibitor with emtricitabine and tenofovir in adults with virologically suppressed HIV (STRATEGY-PI): 48 week results of a randomised, open-label, phase 3b, non-inferiority trial        |
| 723                                                                      | Bedimo                         | 2014 | The RADAR study: week 48 safety and efficacy of RAltegravir combined with boosted DARunavir compared to tenofovir/emtricitabine combined with boosted darunavir in antiretroviral-naive patients. Impact on bone health                                                                                                           |
| 724                                                                      | Cahn                           | 2014 | Dual therapy with lopinavir and ritonavir plus lamivudine versus triple therapy with lopinavir and ritonavir plus two nucleoside reverse transcriptase inhibitors in antiretroviral-therapy-naive adults with HIV-1 infection: 48 week results of the randomised, open label, non-inferiority GARDEL trial                        |
| 725                                                                      | Clotet                         | 2014 | Once-daily dolutegravir versus darunavir plus ritonavir in antiretroviral-naive adults with HIV-1 infection (FLAMINGO): 48 week results from the randomised open-label phase 3b study                                                                                                                                             |
| 726                                                                      | Cooper                         | 2014 | Efficacy and safety of maraviroc vs. efavirenz in treatment-naive patients with HIV-1: 5-year findings                                                                                                                                                                                                                            |
| 727                                                                      | Sierra-Madero                  | 2014 | Effect of the CCR5 antagonist maraviroc on the occurrence of immune reconstitution inflammatory syndrome in HIV (CADIRIS): a double-blind, randomised, placebo-controlled trial                                                                                                                                                   |
| 728                                                                      | Wohl                           | 2014 | Simplification to abacavir/lamivudine + atazanavir maintains viral suppression and improves bone and renal biomarkers in ASSURE, a randomized, open label, non-inferiority trial                                                                                                                                                  |
| 729                                                                      | Lennox                         | 2014 | Efficacy and tolerability of 3 nonnucleoside reverse transcriptase inhibitor-sparing antiretroviral regimens for treatment-naive volunteers infected with HIV-1: a randomized, controlled equivalence trial                                                                                                                       |
| 730                                                                      | Martinez                       | 2014 | Early lipid changes with atazanavir/ritonavir or darunavir/ritonavir                                                                                                                                                                                                                                                              |
| 731                                                                      | Menezes                        | 2014 | A randomized clinical trial comparing metabolic parameters after 48 weeks of standard- and low-dose stavudine therapy and tenofovir disoproxil fumarate therapy in HIV-infected South African patients                                                                                                                            |
| 732                                                                      | Negredo                        | 2014 | Improvement in bone mineral density after switching from tenofovir to abacavir in HIV-1-infected patients with low bone mineral density: two-centre randomized pilot study (OsteoTDF study)                                                                                                                                       |
| 733                                                                      | Paton                          | 2014 | Assessment of second-line antiretroviral regimens for HIV therapy in Africa                                                                                                                                                                                                                                                       |
| 734                                                                      | Pozniak                        | 2014 | Switching to coformulated elvitegravir, cobicistat, emtricitabine, and tenofovir versus continuation of non-nucleoside reverse transcriptase inhibitor with emtricitabine and tenofovir in virologically suppressed adults with HIV (STRATEGY-NNRTI): 48 week results of a randomised, open-label, phase 3b non-inferiority trial |
| 735                                                                      | Raffi                          | 2014 | Ritonavir-boosted darunavir combined with raltegravir or tenofovir-emtricitabine in antiretroviral-naive adults infected with HIV-1: 96 week results from the NEAT001/ANRS143 randomised non-inferiority trial                                                                                                                    |
| 736                                                                      | NR                             | 2014 | Efficacy and safety of Albuvirtide plus Lopinavir-ritonavir in HIV-1-infected adults failed standard first-line ART regimen                                                                                                                                                                                                       |
| 737                                                                      | NR                             | 2014 | A study of Chinese-Western-Combined Therapy for AIDS to improve effect and decrease toxicity                                                                                                                                                                                                                                      |
| 738                                                                      | NR                             | 2014 | Safety Study of Atazanavir Capsules in the Treatment of HIV in Patients Ages 6 - 18 Years                                                                                                                                                                                                                                         |

**Table S4 – List of excluded studies by exclusion reason (continuation)**

| Studies excluded for not describing adverse events specifically in women |                                |      |                                                                                                                                                                                                                                                                 |
|--------------------------------------------------------------------------|--------------------------------|------|-----------------------------------------------------------------------------------------------------------------------------------------------------------------------------------------------------------------------------------------------------------------|
| Amount                                                                   | First author or research group | Year | Title                                                                                                                                                                                                                                                           |
| 739                                                                      | NR                             | 2014 | A clinical research study to see how six medications that are approved for the treatment of HIV-1 infection affect the kidneys. The six approved medications are Stribild, Truvada, Atripla, Reyataz, Norvir, and Kivexa. Both the patient and the investigator |
| 740                                                                      | NR                             | 2014 | Randomized study in patients with chronic HIV infection                                                                                                                                                                                                         |
| 741                                                                      | NR                             | 2014 | Clinical trial to determine viral load in seminal fluid in HIV-positive patients without previous treatment                                                                                                                                                     |
| 742                                                                      | NR                             | 2014 | Reformulated raltegravir (1200 mg) once a day versus raltegravir (400 mg) twice a day in treatment-naïve patients                                                                                                                                               |
| 743                                                                      | NR                             | 2014 | Immune reconstitution in severely immunosuppressed antiretroviral-naïve HIV-1 infected patients (<100 CD4+ T cells/?L) taking antiretroviral regimens based on dolutegravir or ritonavir-boosted darunavir (the AdvanZ-4 Trial)                                 |
| 744                                                                      | NR                             | 2014 | Study to Evaluate the Pharmacodynamics, Safety and Pharmacokinetics of BMS-955176 and BMS-955176 with Atazanavir +/- Ritonavir in HIV-1 Infected Subjects                                                                                                       |
| 745                                                                      | NR                             | 2014 | Study to Evaluate Efficacy, Safety and Tolerability of Darunavir/Cobicistat/Emtricitabine/Tenofovir Alafenamide (D/C/F/TAF) Regimen Versus Boosted Protease Inhibitor (bPI) Along With Emtricitabine/Tenofovir Disoproxil Fumarate (FTC/TDF) Regimen in Virolo  |
| 746                                                                      | NR                             | 2014 | ODYSSEY: once daily Dolutegravir in Young people vS Standard thErapY                                                                                                                                                                                            |
| 747                                                                      | NR                             | 2014 | First-Line Treatment for HIV-2                                                                                                                                                                                                                                  |
| 748                                                                      | NR                             | 2014 | Safety, Pharmacokinetics, and Antiviral Activity of GS-9883 in HIV-1 Infected Subjects                                                                                                                                                                          |
| 749                                                                      | NR                             | 2014 | Safety and Efficacy of Doravirine (MK-1439) in Participants With Human Immunodeficiency Virus 1 (HIV-1) (MK-1439-018)                                                                                                                                           |
| 750                                                                      | NR                             | 2014 | Tipranavir and Ritonavir vs. Saquinavir and Ritonavir Used With Two Nucleoside Reverse Transcriptase Inhibitors in Single Protease Inhibitor-experienced HIV-1 Patients                                                                                         |
| 751                                                                      | NR                             | 2014 | Evaluation of the Safety and Efficacy of Reformulated Raltegravir (MK-0518) 1200 mg Once Daily in Combination With TRUVADA™ in Human Immunodeficiency Virus (HIV)-1 Infected, Treatment-Naïve Participants (MK-0518-292)                                        |
| 752                                                                      | NR                             | 2014 | Safety & Efficacy of Dual Therapy With Raltegravir/Lamivudine                                                                                                                                                                                                   |
| 753                                                                      | NR                             | 2014 | Exploratory Study of Tipranavir and Ritonavir in Multiple Protease Inhibitor-experienced HIV Patients                                                                                                                                                           |
| 754                                                                      | NR                             | 2014 | Evaluation of Renal Function, Efficacy, and Safety When Switching From Tenofovir/Emtricitabine Plus a Protease Inhibitor/Ritonavir, to a Combination of Raltegravir (MK-0518) Plus Nevirapine Plus Lamivudine in HIV-1 Participants With Suppressed Viremia an  |
| 755                                                                      | NR                             | 2014 | Efficacy and Safety Study of Darunavir for the Treatment of HIV/AIDS                                                                                                                                                                                            |
| 756                                                                      | NR                             | 2014 | A Randomised Trial of Dolutegravir (DTG)-Based Antiretroviral Therapy vs. Standard of Care (SOC) in Children With HIV Infection Starting First-line or Switching to Second-line ART                                                                             |
| 757                                                                      | NR                             | 2014 | Efavirenz to Dolutegravir Switch in Patients With CNS Toxicity                                                                                                                                                                                                  |
| 758                                                                      | NR                             | 2014 | Comparative Efficacy and Safety Study of Dolutegravir and Lopinavir/Ritonavir in Second-line Treatment                                                                                                                                                          |
| 759                                                                      | NR                             | 2014 | Study to Evaluate Efficacy and Safety of Darunavir/Cobicistat/Emtricitabine/Tenofovir Alafenamide (D/C/F/TAF) Regimen Versus Boosted Protease Inhibitor (bPI) Along With Emtricitabine/Tenofovir Disoproxil Fumarate (FTC/TDF) Regimen in Virologically-Suppre  |



**Table S4 – List of excluded studies by exclusion reason (continuation)**

| Studies excluded for not describing adverse events specifically in women |                                |      |                                                                                                                                                                                                                                                                                                            |
|--------------------------------------------------------------------------|--------------------------------|------|------------------------------------------------------------------------------------------------------------------------------------------------------------------------------------------------------------------------------------------------------------------------------------------------------------|
| Amount                                                                   | First author or research group | Year | Title                                                                                                                                                                                                                                                                                                      |
| 760                                                                      | NR                             | 2014 | Efficacy and Safety Study of Darunavir for the Treatment of HIV/AIDS                                                                                                                                                                                                                                       |
| 761                                                                      | NR                             | 2014 | PROJECT AHORA-L                                                                                                                                                                                                                                                                                            |
| 762                                                                      | NR                             | 2014 | A Phase III Multicenter, Double-Blind, Randomized, Active Comparator-Controlled Clinical Trial to Evaluate the Safety and Efficacy of Reformulated Raltegravir 1200 mg Once Daily Versus Raltegravir 400 mg Twice Daily, Each in Combination With TRUVADA™, in                                             |
| 763                                                                      | NR                             | 2014 | A PHASE 3B, RANDOMISED, OPEN-LABEL STUDY OF THE ANTIVIRAL ACTIVITY AND SAFETY OF DOLUTEGRAVIR COMPARED TO LOPINAVIR/RITONAVIR BOTH ADMINISTERED WITH DUAL NUCLEOSIDE REVERSE TRANSCRIPTASE INHIBITOR THERAPY IN HIV-1 INFECTED ADULT SUBJECTS WITH TREATMENT F                                             |
| 764                                                                      | NR                             | 2014 | DRV/r + RPV QD: Efficacy and Toxicity Reduction                                                                                                                                                                                                                                                            |
| 765                                                                      | NR                             | 2014 | Effect of switching efavirenz to rilpivirine in treatment of HIV- infected patients with dyslipidemia                                                                                                                                                                                                      |
| 766                                                                      | NR                             | 2014 | A Phase IIIb Study of the Safety, Efficacy, and Tolerability of Switching to a Fixed-dose Combination of Abacavir/Dolutegravir/ Lamivudine From Current Antiretroviral Regimen                                                                                                                             |
| 767                                                                      | Gallant                        | 2015 | Brief Report: Cobicistat Compared With Ritonavir as a Pharmacoenhancer for Atazanavir in Combination With Emtricitabine/Tenofovir Disoproxil Fumarate: Week 144 Results                                                                                                                                    |
| 768                                                                      | Gathe                          | 2015 | Patient-Reported Symptoms over 48 Weeks in a Randomized, Open-Label, Phase 3b Non-inferiority Trial of Adults with HIV Switching to Coformulated Elvitegravir, Cobicistat, Emtricitabine, and Tenofovir DF Versus Continuation of Ritonavir-Boosted Protease Inhibitor with Emtricitabine and Tenofovir DF |
| 769                                                                      | Gallant                        | 2015 | Cobicistat Compared With Ritonavir as a Pharmacoenhancer for Atazanavir in Combination With Emtricitabine/Tenofovir Disoproxil Fumarate: week 144 Results                                                                                                                                                  |
| 770                                                                      | Mills                          | 2015 | Switching from a tenofovir disoproxil fumarate (TDF)-based regimen to a tenofovir alafenamide (TAF)-based regimen: data in virologically suppressed adults through 48 weeks of treatment                                                                                                                   |
| 771                                                                      | Walmsley                       | 2015 | Dolutegravir plus abacavir/lamivudine for the treatment of HIV-1 infection in antiretroviral therapy-naive patients: week 96 and week 144 results from the SINGLE randomized clinical trial                                                                                                                |
| 772                                                                      | Goodal                         | 2015 | Once vs. twice-daily lopinavir/ritonavir in HIV-1-infected children: paediatric European Network for Treatment of AIDS (PENTA)                                                                                                                                                                             |
| 773                                                                      | Akil                           | 2015 | Dolutegravir versus placebo in subjects harbouring HIV-1 with integrase inhibitor resistance associated substitutions: 48-week results from VIKING-4, a randomized study                                                                                                                                   |
| 774                                                                      | Mills                          | 2015 | Tenofovir Alafenamide Versus Tenofovir Disoproxil Fumarate in the First Protease Inhibitor-Based Single-Tablet Regimen for Initial HIV-1 Therapy: A Randomized Phase 2 Study                                                                                                                               |
| 775                                                                      | Miro                           | 2015 | Immune Reconstitution in Severely Immunosuppressed Antiretroviral-Naive HIV-1-Infected Patients Starting Efavirenz, Lopinavir-Ritonavir, or Atazanavir-Ritonavir Plus Tenofovir/Emtricitabine: Final 48-Week Results (The Advanz-3 Trial)                                                                  |
| 776                                                                      | Antinori                       | 2015 | Week 48 efficacy and central nervous system analysis of darunavir/ritonavir monotherapy versus darunavir/ritonavir with two nucleoside analogues                                                                                                                                                           |

**Table S4 – List of excluded studies by exclusion reason (continuation)**

| Studies excluded for not describing adverse events specifically in women |                                |      |                                                                                                                                                                                                                                                                                                        |
|--------------------------------------------------------------------------|--------------------------------|------|--------------------------------------------------------------------------------------------------------------------------------------------------------------------------------------------------------------------------------------------------------------------------------------------------------|
| Amount                                                                   | First author or research group | Year | Title                                                                                                                                                                                                                                                                                                  |
| 777                                                                      | Arribas                        | 2015 | Dual treatment with lopinavir-ritonavir plus lamivudine versus triple treatment with lopinavir-ritonavir plus lamivudine or emtricitabine and a second nucleos(t)ide reverse transcriptase inhibitor for maintenance of HIV-1 viral suppression (OLE): a randomised, open-label, non-inferiority trial |
| 778                                                                      | Chéret                         | 2015 | Intensive five-drug antiretroviral therapy regimen versus standard triple-drug therapy during primary HIV-1 infection (OPTIPRIM-ANRS 147): a randomised, open-label, phase 3 trial                                                                                                                     |
| 779                                                                      | Coovadia                       | 2015 | Efavirenz-Based Antiretroviral Therapy Among Nevirapine-Exposed HIV-Infected Children in South Africa: A Randomized Clinical Trial                                                                                                                                                                     |
| 780                                                                      | Stein                          | 2015 | A prospective, randomized clinical trial of antiretroviral therapies on carotid wall thickness                                                                                                                                                                                                         |
| 781                                                                      | Taiwo                          | 2015 | Less Bone Loss With Maraviroc- Versus Tenofovir-Containing Antiretroviral Therapy in the AIDS Clinical Trials Group A5303 Study                                                                                                                                                                        |
| 782                                                                      | Tashima                        | 2015 | HIV Salvage Therapy Does Not Require Nucleoside Reverse Transcriptase Inhibitors: A Randomized, Controlled Trial                                                                                                                                                                                       |
| 783                                                                      | Tebas                          | 2015 | Greater change in bone turnover markers for efavirenz/emtricitabine/tenofovir disoproxil fumarate versus dolutegravir + abacavir/lamivudine in antiretroviral therapy-naive adults over 144 weeks                                                                                                      |
| 784                                                                      | Walmsley                       | 2015 | Brief Report: Dolutegravir Plus Abacavir/Lamivudine for the Treatment of HIV-1 Infection in Antiretroviral Therapy-Naive Patients: Week 96 and Week 144 Results From the SINGLE Randomized Clinical Trial                                                                                              |
| 785                                                                      | Lalezari                       | 2015 | Safety and efficacy of the HIV-1 attachment inhibitor prodrug BMS-663068 in treatment-experienced individuals: 24 week results of AI438011, a phase 2b, randomised controlled trial                                                                                                                    |
| 786                                                                      | Margolis                       | 2015 | Cabotegravir plus rilpivirine, once a day, after induction with cabotegravir plus nucleoside reverse transcriptase inhibitors in antiretroviral-naive adults with HIV-1 infection (LATTE): a randomised, phase 2b, dose-ranging trial                                                                  |
| 787                                                                      | Martinez                       | 2015 | Differential body composition effects of protease inhibitors recommended for initial treatment of HIV infection: a randomized clinical trial                                                                                                                                                           |
| 788                                                                      | Molina                         | 2015 | Once-daily dolutegravir versus darunavir plus ritonavir for treatment-naive adults with HIV-1 infection (FLAMINGO): 96 week results from a randomised, open-label, phase 3b study                                                                                                                      |
| 789                                                                      | Moyle                          | 2015 | A randomized comparative trial of continued abacavir/lamivudine plus efavirenz or replacement with efavirenz/emtricitabine/tenofovir DF in hypercholesterolemic HIV-1 infected individuals                                                                                                             |
| 790                                                                      | Paton                          | 2015 | Protease inhibitor monotherapy for long-term management of HIV infection: a randomised, controlled, open-label, non-inferiority trial                                                                                                                                                                  |
| 791                                                                      | NR                             | 2015 | Safety and efficacy study of Different Interval Dose Administration Sifuvirtide for Injection                                                                                                                                                                                                          |
| 792                                                                      | NR                             | 2015 | The Dolutegravir Antiretroviral Mono-Therapy for HIV Trial                                                                                                                                                                                                                                             |
| 793                                                                      | NR                             | 2015 | A study to test the safety, tolerability and ability to maintain HIV suppression of switching from a tenofovir disoproxil fumarate (TDF) containing regimen to elvitegravir/cobicistat/emtricitabine/ tenofovir alafenamide (E/C/F/TAF) fixed-dose combination                                         |
| 794                                                                      | NR                             | 2015 | This study will test an experimental drug called GS-9883/F/TAF (GS-9883/emtricitabine/tenofovir alafenamide) fixed dose combination (FDC) for the treatment of HIV-1 infection. The purpose of this study is to test the effectiveness of switching to GS-9883                                         |

**Table S4 – List of excluded studies by exclusion reason (continuation)**

| Studies excluded for not describing adverse events specifically in women |                                |      |                                                                                                                                                                                                                                                                |
|--------------------------------------------------------------------------|--------------------------------|------|----------------------------------------------------------------------------------------------------------------------------------------------------------------------------------------------------------------------------------------------------------------|
| Amount                                                                   | First author or research group | Year | Title                                                                                                                                                                                                                                                          |
| 795                                                                      | NR                             | 2015 | This study will test an experimental drug called GS-9883/emtricitabine/tenofovir alafenamide (GS-9883/F/TAF) for the treatment of HIV-1 infection. The purpose of this study is to evaluate safety, and to determine whether GS-9883/F/TAF as a fixed dose com |
| 796                                                                      | NR                             | 2015 | The purpose of this study is to evaluate if F/R/TAF works as well as Eviplera. It is also to see if F/R/TAF will maintain the control of your HIV-1 infection when compared to Eviplera. Safety, how well your body accepts the drug, will be evaluated        |
| 797                                                                      | NR                             | 2015 | A study to test the safety, tolerability and ability to maintain HIV suppression of switching from a current regimen consisting of abacavir/lamivudine (ABC/3TC) plus a third antiretroviral agent to the elvitegravir/cobicistat/emtricitabine/tenofovir a    |
| 798                                                                      | NR                             | 2015 | The purpose of this study is to evaluate if F/R/TAF works as well as Atripla. It is also to see if F/R/TAF will maintain the control of your HIV-1 infection when compared to Atripla. Safety, how well your body accepts the drug, will be evaluated          |
| 799                                                                      | NR                             | 2015 | Outcome of plasma lipid profile in patients switching from Atripla® to Eviplera® compared to continuing on Atripla® (EfaRiLipidomics)                                                                                                                          |
| 800                                                                      | NR                             | 2015 | A pilot 24-week open-label, randomized, controlled clinical trial to assess the safety, tolerability and efficacy of dual therapy with Raltegravir/Lamivudine combination when replacing standard combination therapy in HIV-infected patients with prolonged  |
| 801                                                                      | NR                             | 2015 | clinical trial to assess the safety, tolerability and efficacy of two dolutegravir-based simplification strategies in HIV-infected patients with prolonged virological suppression                                                                             |
| 802                                                                      | NR                             | 2015 | The role of Home packs of HIV PEPSE in High Risk Individuals                                                                                                                                                                                                   |
| 803                                                                      | NR                             | 2015 | MK-1439A once a day versus ATRIPLA once a day in treatment-naïve HIV-1 infected subjects                                                                                                                                                                       |
| 804                                                                      | NR                             | 2015 | A Study to Evaluate Efficacy and Safety of Darunavir/Cobicistat/Emtricitabine/Tenofovir Alafenamide (D/C/F/TAF) Fixed Dose Combination (FDC) Versus a Regimen Consisting of Darunavir/Cobicistat FDC with Emtricitabine/Tenofovir Disoproxil Fumarate FDC in T |
| 805                                                                      | NR                             | 2015 | Switch from Efavirenz/Atripla to Rilpivirine                                                                                                                                                                                                                   |
| 806                                                                      | NR                             | 2015 | A Phase III, randomized, multicenter, parallel-group, non-inferiority study evaluating the efficacy, safety, and tolerability of switching to dolutegravir plus rilpivirine from current integrase inhibitor, NNRTI, or PI-based antiretroviral regimen in HIV |
| 807                                                                      | NR                             | 2015 | De Dolutegravir Antiretroviral Mono-Therapy for HIV Trial                                                                                                                                                                                                      |
| 808                                                                      | NR                             | 2015 | Study investigating a new medicine - Doravirine in patients diagnosed with HIV-1 without previous treatment for this disease. Neither the doctor or patient will know the treatment group. All the patients will be treated with Truvada or Epzicom/Kivexa, so |
| 809                                                                      | NR                             | 2015 | SMILE: strategy for Maintenance of HIV suppression with elvitegravir + darunavir/ritonavir in children (PENTA 17)                                                                                                                                              |
| 810                                                                      | NR                             | 2015 | A Study of Islatravir (MK-8591) in Anti-Retroviral Therapy-Naive, Human Immunodeficiency Virus-1 Infected Participants (MK-8591-003)                                                                                                                           |
| 811                                                                      | NR                             | 2015 | Safety and Efficacy of a Switch to MK-1439A in Human Immunodeficiency Virus (HIV-1)-Infected Participants Virologically Suppressed on an Anti-retroviral Regimen in Combination With Two Nucleoside Reverse Transcriptase Inhibitors (MK-1439A-024)            |
| 812                                                                      | NR                             | 2015 | Switch Study to Evaluate F/TAF in HIV-1 Infected Adults Who Are Virologically Suppressed on Regimens Containing ABC/3TC                                                                                                                                        |

**Table S4 – List of excluded studies by exclusion reason (continuation)**

| Studies excluded for not describing adverse events specifically in women |                                |      |                                                                                                                                                                                                                                                                |
|--------------------------------------------------------------------------|--------------------------------|------|----------------------------------------------------------------------------------------------------------------------------------------------------------------------------------------------------------------------------------------------------------------|
| Amount                                                                   | First author or research group | Year | Title                                                                                                                                                                                                                                                          |
| 813                                                                      | NR                             | 2015 | Darunavir/Ritonavir + Lamivudine Versus Darunavir/Ritonavir +Emtricitabine/Tenofovir in Naïve HIV-1 Infected Subjects                                                                                                                                          |
| 814                                                                      | NR                             | 2015 | Test Albuvirtide in Experienced Patients                                                                                                                                                                                                                       |
| 815                                                                      | NR                             | 2015 | Strategy for Maintenance of HIV Suppression With Once Daily Integrate Inhibitor+Darunavir/Ritonavir in Children                                                                                                                                                |
| 816                                                                      | NR                             | 2015 | Switch Study to Evaluate the Safety and Efficacy of Emtricitabine/Rilpivirine/Tenofovir Alafenamide (FTC/RPV/TAF) Fixed Dose Combination (FDC) in HIV-1 Positive Adults Who Are Virologically Suppressed on Emtricitabine/Rilpivirine/Tenofovir Disoproxil Fum |
| 817                                                                      | NR                             | 2015 | Efficacy, Safety and Optimal Dose Selection VM-1500 in Comparison to Efavirenz When Added to Standard-of-care Antiretroviral Therapy                                                                                                                           |
| 818                                                                      | NR                             | 2015 | Study to Evaluate the Efficacy of MONotherapy of TiviCAY® Versus a Triple Therapy in HIV-1-infected Patients                                                                                                                                                   |
| 819                                                                      | NR                             | 2015 | Strategy-confirming Study of BMS-955176 to Treat HIV-1 Infected Treatment-experienced Adults                                                                                                                                                                   |
| 820                                                                      | NR                             | 2015 | Switching From a Tenofovir Disoproxil Fumarate (TDF) Containing Regimen to Elvitegravir/Cobicistat/Emtricitabine/ Tenofovir Alafenamide (E/C/F/TAF) Fixed-Dose Combination (FDC) in Virologically-Suppressed, HIV-1 Infected Adults Aged ≥ 60 Years            |
| 821                                                                      | NR                             | 2015 | Safety and Efficacy of Switching From Regimens of ABC/3TC + a 3rd Agent to E/C/F/TAF Fixed-Dose Combination (FDC) in Virologically-Suppressed HIV 1 Infected Adults                                                                                            |
| 822                                                                      | NR                             | 2015 | Renal Integrase Study                                                                                                                                                                                                                                          |
| 823                                                                      | NR                             | 2015 | Darunavir/Cobicistat and Dolutegravir to Maintain Virologic Suppression and Reduce NRTI-associated Toxicity                                                                                                                                                    |
| 824                                                                      | NR                             | 2015 | Safety and Efficacy of Switching From Regimens Consisting of Boosted Atazanavir or Darunavir Plus Either Emtricitabine/Tenofovir or Abacavir/Lamivudine to Bictegravir/Emtricitabine/Tenofovir Alafenamide in Virologically Suppressed HIV-1 Infected Adults   |
| 825                                                                      | NR                             | 2015 | Safety and Efficacy of Switching From Dolutegravir and ABC/3TC or ABC/DTG/3TC to B/F/TAF in HIV-1 Infected Adults Who Are Virologically Suppressed                                                                                                             |
| 826                                                                      | NR                             | 2015 | Dual Therapy With Boosted Darunavir + Dolutegravir                                                                                                                                                                                                             |
| 827                                                                      | NR                             | 2015 | Safety, PK and PD Study of ABX464 in Untreated HIV Patients                                                                                                                                                                                                    |
| 828                                                                      | NR                             | 2015 | Immune Recovery in Advanced , ARV-naïve, HIV-1-infected Individuals Taking Dolutegravir or Ritonavir-boosted Darunavir                                                                                                                                         |
| 829                                                                      | NR                             | 2015 | Safety and Efficacy of Bictegravir/Emtricitabine/Tenofovir Alafenamide Versus Abacavir/Dolutegravir/Lamivudine in HIV-1 Infected, Antiretroviral Treatment-Naïve Adults                                                                                        |
| 830                                                                      | NR                             | 2015 | Safety and Efficacy of Bictegravir + Emtricitabine/Tenofovir Alafenamide Versus Dolutegravir + Emtricitabine/Tenofovir Alafenamide in HIV-1 Infected, Antiretroviral Treatment-Naïve Adults                                                                    |
| 831                                                                      | NR                             | 2015 | MK-1439A VERSUS ATRIPLA™ IN TREATMENT-NAÏVE HIV-INFECTED SUBJECTS                                                                                                                                                                                              |
| 832                                                                      | NR                             | 2015 | A PHASE 2B RANDOMIZED, ACTIVE-CONTROLLED, STAGED, OPEN-LABEL TRIAL TO INVESTIGATE SAFETY AND EFFICACY OF BMS-955176 IN COMBINATION WITH DOLUTEGRAVIR AND ATAZANAVIR (WITH OR WITHOUT RITONAVIR) IN TREATMENT-EXPERIENCED HIV-1 INFECTED ADULTS                 |
| 833                                                                      | NR                             | 2015 | Bone Mineral Density in Human Immunodeficiency Virus Type 1 (HIV-1)-Infected Adult Subjects Switching From a Tenofovir Regimen to a Dolutegravir Plus Rilpivirine Regimen                                                                                      |

**Table S4 – List of excluded studies by exclusion reason (continuation)**

| Studies excluded for not describing adverse events specifically in women |                                     |      |                                                                                                                                                                                                                                                                                                            |
|--------------------------------------------------------------------------|-------------------------------------|------|------------------------------------------------------------------------------------------------------------------------------------------------------------------------------------------------------------------------------------------------------------------------------------------------------------|
| Amount                                                                   | First author or research group      | Year | Title                                                                                                                                                                                                                                                                                                      |
| 834                                                                      | Gallant                             | 2016 | Efficacy and safety of tenofovir alafenamide versus tenofovir disoproxil fumarate given as fixed-dose combinations containing emtricitabine as backbones for treatment of HIV-1 infection in virologically suppressed adults: a randomised, double-blind, active-controlled phase 3 trial                  |
| 835                                                                      | Ripa                                | 2016 | Maraviroc in addition to cART during primary HIV infection: results from MAIN randomized clinical trial and 96-weeks follow-up                                                                                                                                                                             |
| 836                                                                      | Van Lunzen                          | 2016 | Switch to ritonavir-boosted atazanavir plus raltegravir in virologically suppressed patients with HIV-1 infection: a randomized pilot study                                                                                                                                                                |
| 837                                                                      | van Lunzen                          | 2016 | Rilpivirine vs. efavirenz-based single-tablet regimens in treatment-naïve adults: week 96 efficacy and safety from a randomized phase 3b study                                                                                                                                                             |
| 838                                                                      | Wilkins                             | 2016 | Patient-reported outcomes in the single-tablet regimen (STaR) trial of rilpivirine/emtricitabine/tenofovir disoproxil fumarate versus efavirenz/emtricitabine/tenofovir disoproxil fumarate in antiretroviral treatment-naïve adults infected with HIV-1 through 48 weeks of treatment                     |
| 839                                                                      | Hamzah                              | 2016 | Effects on vitamin D, bone and the kidney of switching from fixed-dose tenofovir disoproxil fumarate/emtricitabine/efavirenz to darunavir/ritonavir monotherapy: a randomized, controlled trial (MIDAS)                                                                                                    |
| 840                                                                      | Maggiolo                            | 2016 | NRTI Sparing Therapy in Virologically Controlled HIV-1 Infected Subjects: Results of a Controlled, Randomized Trial (Probe)                                                                                                                                                                                |
| 841                                                                      | Cook                                | 2016 | Bone Mineral Density and Vitamin D Levels in HIV Treatment-Naïve African American Individuals Randomized to Receive HIV Drug Regimens                                                                                                                                                                      |
| 842                                                                      | Collins                             | 2016 | A Randomized Switch From Nevirapine-Based Antiretroviral Therapy to Single Tablet Rilpivirine/Emtricitabine/Tenofovir Disoproxil Fumarate in Virologically Suppressed Human Immunodeficiency Virus-1-Infected Rwandans                                                                                     |
| 843                                                                      | Cooper                              | 2016 | Tipranavir/Ritonavir (500/200 mg and 500/100 mg) Was Virologically Non-Inferior to Lopinavir/Ritonavir (400/100 mg) at Week 48 in Treatment-Naïve HIV-1-Infected Patients: A Randomized, Multinational, Multicenter Trial                                                                                  |
| 844                                                                      | Rougemont                           | 2016 | Safety of zidovudine dose reduction in treatment-naïve HIV infected patients. A randomized controlled study (MiniZID)                                                                                                                                                                                      |
| 845                                                                      | Slama                               | 2016 | Efficacy and safety of once-daily ritonavir-boosted atazanavir or darunavir in combination with a dual nucleos(t)ide analogue backbone in HIV-1-infected combined ART (cART)-naïve patients with severe immunosuppression: a 48 week, non-comparative, randomized, multicentre trial (IMEA 040 DATA trial) |
| 846                                                                      | Stellbrink                          | 2016 | Once-daily maraviroc versus tenofovir/emtricitabine each combined with darunavir/ritonavir for initial HIV-1 treatment                                                                                                                                                                                     |
| 847                                                                      | The BREATHER (PENTA 16) Trial Group | 2016 | Weekends-off efavirenz-based antiretroviral therapy in HIV-infected children, adolescents, and young adults (BREATHER): a randomised, open-label, non-inferiority, phase 2/3 trial                                                                                                                         |
| 848                                                                      | Wohl                                | 2016 | The ASSURE study: HIV-1 suppression is maintained with bone and renal biomarker improvement 48 weeks after ritonavir discontinuation and randomized switch to abacavir/lamivudine + atazanavir                                                                                                             |
| 849                                                                      | Wu                                  | 2016 | Efficacy and safety of long-acting HIV fusion inhibitor albuvirtide in antiretroviral-experienced adults with HIV-1: interim 48-week results from the randomized, controlled, phase 3, non-inferiority TALENT study                                                                                        |
| 850                                                                      | La Rosa                             | 2016 | Raltegravir in second-line antiretroviral therapy in resource-limited settings (SELECT): a randomised, phase 3, non-inferiority study                                                                                                                                                                      |

**Table S4 – List of excluded studies by exclusion reason (continuation)**

| Studies excluded for not describing adverse events specifically in women |                                |      |                                                                                                                                                                                                                                                                                                                  |
|--------------------------------------------------------------------------|--------------------------------|------|------------------------------------------------------------------------------------------------------------------------------------------------------------------------------------------------------------------------------------------------------------------------------------------------------------------|
| Amount                                                                   | First author or research group | Year | Title                                                                                                                                                                                                                                                                                                            |
| 851                                                                      | Llamoso                        | 2016 | HIV-1 attachment inhibitor prodrug BMS-663068 in antiretroviral-experienced subjects: week 96 safety analysis                                                                                                                                                                                                    |
| 852                                                                      | McComsey                       | 2016 | Body Composition Changes After Initiation of Raltegravir or Protease Inhibitors: ACTG A5260s                                                                                                                                                                                                                     |
| 853                                                                      | Mills                          | 2016 | Switching from tenofovir disoproxil fumarate to tenofovir alafenamide in antiretroviral regimens for virologically suppressed adults with HIV-1 infection: a randomised, active-controlled, multicentre, open-label, phase 3, non-inferiority study                                                              |
| 854                                                                      | Mulenga                        | 2016 | Abacavir, zidovudine, or stavudine as paediatric tablets for African HIV-infected children (CHAPAS-3): an open-label, parallel-group, randomised controlled trial                                                                                                                                                |
| 855                                                                      | Musiime                        | 2016 | Once vs twice-daily abacavir and lamivudine in African children                                                                                                                                                                                                                                                  |
| 856                                                                      | Pett                           | 2016 | Maraviroc, as a Switch Option, in HIV-1-infected Individuals With Stable, Well-controlled HIV Replication and R5-tropic Virus on Their First Nucleoside/Nucleotide Reverse Transcriptase Inhibitor Plus Ritonavir-boosted Protease Inhibitor Regimen: Week 48 Results of the Randomized, Multicenter MARCH Study |
| 857                                                                      | Rojas                          | 2016 | Improvement of lipoatrophy by switching from efavirenz to lopinavir/ritonavir                                                                                                                                                                                                                                    |
| 858                                                                      | Santos                         | 2016 | Short Communication: Efficacy and Safety of Treatment Simplification to Lopinavir/Ritonavir or Darunavir/Ritonavir Monotherapy: A Randomized Clinical Trial                                                                                                                                                      |
| 859                                                                      | Overton                        | 2016 | Effects of once-daily darunavir/ritonavir versus atazanavir/ritonavir on insulin sensitivity in HIV-infected persons over 48 weeks: results of an exploratory substudy of METABOLIK, a phase 4, randomized trial                                                                                                 |
| 860                                                                      | NR                             | 2016 | Safety study of ABX464 in HIV controlled patients treated with boosted protease inhibitor treatment                                                                                                                                                                                                              |
| 861                                                                      | NR                             | 2016 | A study to evaluate the efficacy, safety, and tolerability of dolutegravir plus lamivudine compared to dolutegravir plus tenofovir/emtricitabine in HIV-1-infected patients that have not been treated yet                                                                                                       |
| 862                                                                      | NR                             | 2016 | Assess the effect of switching HIV-1 infected subjects with CNS toxicity (= Grade 2) from ATRIPLA™ or its components to MK-1439A                                                                                                                                                                                 |
| 863                                                                      | NR                             | 2016 | Switching to tenofovir alafenamide fumarate or abacavir in patients with renal impairment due to tenofovir disoproxil fumarate                                                                                                                                                                                   |
| 864                                                                      | NR                             | 2016 | A Phase III study to compare two drugs (called Cabotegravir and Rilpivirine, as oral tablets followed by long-acting injections) to current HIV regimens containing three drugs                                                                                                                                  |
| 865                                                                      | NR                             | 2016 | Single and Repeated Dose Escalation Study of GSK2838232                                                                                                                                                                                                                                                          |
| 866                                                                      | NR                             | 2016 | Comparative efficacy and safety study of dolutegravir and lopinavir/ritonavir in second-line treatment                                                                                                                                                                                                           |
| 867                                                                      | NR                             | 2016 | Safety and Biological Activity of Vesatolimod in HIV-1 Infected, Virologically Suppressed Adults                                                                                                                                                                                                                 |
| 868                                                                      | NR                             | 2016 | Effects of Switching From ATRIPLA™ (Efavirenz, Tenofovir, Emtricitabine) to MK-1439A (Doravirine, Tenofovir, Lamivudine) in Virologically-Suppressed Participants (MK-1439A-028)                                                                                                                                 |
| 869                                                                      | NR                             | 2016 | Evaluation of Low-dose Darunavir in a Switch Study                                                                                                                                                                                                                                                               |
| 870                                                                      | NR                             | 2016 | Impact of CCR5 Blockade in HIV+ Kidney Transplant Recipients                                                                                                                                                                                                                                                     |
| 871                                                                      | NR                             | 2016 | Efficacy, and Safety Study of Optimized Background Antiretroviral Regimen (OB) in Combination With Enfuvirtide in the Treatment-Experienced Participants With Human Immunodeficiency Virus-1 (HIV-1) Infection                                                                                                   |
| 872                                                                      | NR                             | 2016 | Switching From Tenofovir Disoproxil Fumarate to Abacavir or Tenofovir Alafenamide                                                                                                                                                                                                                                |
| 873                                                                      | NR                             | 2016 | Bone Health in Aging HIV Infected Women                                                                                                                                                                                                                                                                          |

**Table S4 – List of excluded studies by exclusion reason (continuation)**

| Studies excluded for not describing adverse events specifically in women |                                |      |                                                                                                                                                                                                                                                                                 |
|--------------------------------------------------------------------------|--------------------------------|------|---------------------------------------------------------------------------------------------------------------------------------------------------------------------------------------------------------------------------------------------------------------------------------|
| Amount                                                                   | First author or research group | Year | Title                                                                                                                                                                                                                                                                           |
| 874                                                                      | NR                             | 2016 | Protease Inhibitor vs. Raltegravir-based ART and Inflammation in HIV Infection                                                                                                                                                                                                  |
| 875                                                                      | NR                             | 2016 | Safety and Efficacy of Switching to a FDC of B/F/TAF From E/C/F/TAF, E/C/F/TDF, or ATV+RTV+FTC/TDF in Virologically Suppressed HIV-1 Infected Women                                                                                                                             |
| 876                                                                      | NR                             | 2016 | Efficacy and Safety of a Dolutegravir-based Regimen for the Initial Management of HIV Infected Adults in Resource-limited Settings                                                                                                                                              |
| 877                                                                      | NR                             | 2016 | Dose Optimisation of Stavudine for the Treatment of HIV Infection                                                                                                                                                                                                               |
| 878                                                                      | NR                             | 2016 | Study Evaluating the Efficacy, Safety, and Tolerability of Switching to Long-acting Cabotegravir Plus Long-acting Rilpivirine From Current Antiretroviral Regimen in Virologically Suppressed HIV-1-infected Adults                                                             |
| 879                                                                      | NR                             | 2016 | An Efficacy, Safety, and Tolerability Study Comparing Dolutegravir Plus Lamivudine With Dolutegravir Plus Tenofovir/Emtricitabine in Treatment naïve HIV Infected Subjects (Gemini 1)                                                                                           |
| 880                                                                      | NR                             | 2016 | An Efficacy, Safety, and Tolerability Study Comparing Dolutegravir (DTG) Plus Lamivudine (3TC) With Dolutegravir Plus Tenofovir/Emtricitabine in Treatment naïve HIV Infected Subjects (Gemini 2)                                                                               |
| 881                                                                      | NR                             | 2016 | Study to Evaluate the Efficacy, Safety, and Tolerability of Long-acting Intramuscular Cabotegravir and Rilpivirine for Maintenance of Virologic Suppression Following Switch From an Integrase Inhibitor in HIV-1 Infected Therapy Naïve Participants                           |
| 882                                                                      | NR                             | 2016 | Study to evaluate and compare anti retroviral tablet formulations for oral fixed dose and solutions in children                                                                                                                                                                 |
| 883                                                                      | NR                             | 2016 | Malnutrition and Antiretroviral Timing in Children with HIV (MATCH)                                                                                                                                                                                                             |
| 884                                                                      | NR                             | 2016 | toxicity, and the drug dosing parameters evaluations comparing dispersible tablets of efavirenz and oral liquid in children                                                                                                                                                     |
| 885                                                                      | DeJesus                        | 2017 | Switching from efavirenz, emtricitabine, and tenofovir disoproxil fumarate to tenofovir alafenamide coformulated with rilpivirine and emtricitabine in virally suppressed adults with HIV-1 infection: a randomised, double-blind, multicentre, phase 3b, non-inferiority study |
| 886                                                                      | Di Giambenedetto               | 2017 | Treatment simplification to atazanavir/ritonavir + lamivudine versus maintenance of atazanavir/ritonavir + two NRTIs in virologically suppressed HIV-1-infected patients: 48 week results from a randomized trial (ATLAS-M)                                                     |
| 887                                                                      | Gallant                        | 2017 | Bictegravir, emtricitabine, and tenofovir alafenamide versus dolutegravir, abacavir, and lamivudine for initial treatment of HIV-1 infection (GS-US-380-1489): a double-blind, multicentre, phase 3, randomised controlled non-inferiority trial                                |
| 888                                                                      | Gatell                         | 2017 | Switching from a ritonavir-boosted protease inhibitor to a dolutegravir-based regimen for maintenance of HIV viral suppression in patients with high cardiovascular risk                                                                                                        |
| 889                                                                      | Girard                         | 2017 | Week 96 efficacy and safety of darunavir/ritonavir monotherapy vs. darunavir/ritonavir with two nucleoside reverse transcriptase inhibitors in the PROTEA trial                                                                                                                 |
| 890                                                                      | Van Der Heijden                | 2017 | A switch to raltegravir does not lower platelet reactivity in HIV-infected adults                                                                                                                                                                                               |
| 891                                                                      | Cournil                        | 2017 | Evolution of renal function in African patients initiating second-line antiretroviral treatment: findings from the ANRS 12169 2LADY trial                                                                                                                                       |
| 892                                                                      | Trottier                       | 2017 | Dolutegravir/abacavir/lamivudine versus current ART in virally suppressed patients (STRIIVING): a 48-week, randomized, non-inferiority, open-label, Phase IIIb study                                                                                                            |

**Table S4 – List of excluded studies by exclusion reason (continuation)**

| Studies excluded for not describing adverse events specifically in women |                                |      |                                                                                                                                                                                                                                                                                                                                                                              |
|--------------------------------------------------------------------------|--------------------------------|------|------------------------------------------------------------------------------------------------------------------------------------------------------------------------------------------------------------------------------------------------------------------------------------------------------------------------------------------------------------------------------|
| Amount                                                                   | First author or research group | Year | Title                                                                                                                                                                                                                                                                                                                                                                        |
| 893                                                                      | Arribas                        | 2017 | Simplification to single-tablet regimen of elvitegravir, cobicistat, emtricitabine, tenofovir DF from multi-tablet ritonavir-boosted protease inhibitor plus coformulated emtricitabine and tenofovir DF regimens: week 96 results of STRATEGY-PI                                                                                                                            |
| 894                                                                      | Harris                         | 2017 | Efficacy and safety of "unboosting" atazanavir in a randomized controlled trial among HIV-infected patients receiving tenofovir DF                                                                                                                                                                                                                                           |
| 895                                                                      | Pozniak                        | 2017 | Switching to the single-tablet regimen of elvitegravir, cobicistat, emtricitabine, and tenofovir DF from non-nucleoside reverse transcriptase inhibitor plus coformulated emtricitabine and tenofovir DF regimens: Week 96 results of STRATEGY-NNRTI                                                                                                                         |
| 896                                                                      | Huhn                           | 2017 | A Randomized, Open-Label Trial to Evaluate Switching to Elvitegravir/Cobicistat/Emtricitabine/Tenofovir Alafenamide Plus Darunavir in Treatment-Experienced HIV-1-Infected Adults                                                                                                                                                                                            |
| 897                                                                      | Agwu                           | 2017 | Decline in CD4 T lymphocytes with monotherapy bridging strategy for non-adherent adolescents living with HIV infection: Results of the IMPAACT P1094 randomized trial                                                                                                                                                                                                        |
| 898                                                                      | Boyd                           | 2017 | Body composition and metabolic outcomes after 96 weeks of treatment with ritonavir-boosted lopinavir plus either nucleoside or nucleotide reverse transcriptase inhibitors or raltegravir in patients with HIV with virological failure of a standard first-line antiretroviral therapy regimen: a substudy of the randomised, open-label, non-inferiority SECOND-LINE study |
| 899                                                                      | Ciaffi                         | 2017 | Boosted protease inhibitor monotherapy versus boosted protease inhibitor plus lamivudine dual therapy as second-line maintenance treatment for HIV-1-infected patients in sub-Saharan Africa (ANRS12 286/MOBIDIP): a multicentre, randomised, parallel, open-label, superiority trial                                                                                        |
| 900                                                                      | Dahourou                       | 2017 | Efavirenz-based simplification after successful early lopinavir-boosted-ritonavir-based therapy in HIV-infected children in Burkina Faso and Côte d'Ivoire: the MONOD ANRS 12206 non-inferiority randomised trial                                                                                                                                                            |
| 901                                                                      | Kroidl                         | 2017 | Virological efficacy of 24-week fozivudine-based regimen in ART-naive patients from Tanzania and Côte d'Ivoire                                                                                                                                                                                                                                                               |
| 902                                                                      | Margolis                       | 2017 | Long-acting intramuscular cabotegravir and rilpivirine in adults with HIV-1 infection (LATTE-2): 96-week results of a randomised, open-label, phase 2b, non-inferiority trial                                                                                                                                                                                                |
| 903                                                                      | Negredo                        | 2017 | Switching from a ritonavir-boosted PI to dolutegravir as an alternative strategy in virologically suppressed HIV-infected individuals                                                                                                                                                                                                                                        |
| 904                                                                      | Orkin                          | 2017 | Switching from tenofovir disoproxil fumarate to tenofovir alafenamide coformulated with rilpivirine and emtricitabine in virally suppressed adults with HIV-1 infection: a randomised, double-blind, multicentre, phase 3b, non-inferiority study                                                                                                                            |
| 905                                                                      | Perez-Molina                   | 2017 | Simplification to dual therapy (atazanavir/ritonavir+lamivudine) versus standard triple therapy [atazanavir/ritonavir+two nucleos(t)ides] in virologically stable patients on antiretroviral therapy: 96 week results from an open-label, non-inferiority, randomized clinical trial (SALT study)                                                                            |
| 906                                                                      | Pulido                         | 2017 | Dual Therapy With Darunavir and Ritonavir Plus Lamivudine vs Triple Therapy With Darunavir and Ritonavir Plus Tenofovir Disoproxil Fumarate and Emtricitabine or Abacavir and Lamivudine for Maintenance of Human Immunodeficiency Virus Type 1 Viral Suppression: Randomized, Open-Label, Noninferiority DUAL-GESIDA 8014-RIS-EST45 Trial                                   |



**Table S4 – List of excluded studies by exclusion reason (continuation)**

| Studies excluded for not describing adverse events specifically in women |                                |      |                                                                                                                                                                                                                                                                                          |
|--------------------------------------------------------------------------|--------------------------------|------|------------------------------------------------------------------------------------------------------------------------------------------------------------------------------------------------------------------------------------------------------------------------------------------|
| Amount                                                                   | First author or research group | Year | Title                                                                                                                                                                                                                                                                                    |
| 907                                                                      | Raffi                          | 2017 | Brief Report: Long-Term (96-Week) Efficacy and Safety After Switching From Tenofovir Disoproxil Fumarate to Tenofovir Alafenamide in HIV-Infected, Virologically Suppressed Adults                                                                                                       |
| 908                                                                      | NR                             | 2017 | A Clinical Trial to Study the Safety and Efficacy of TLE-400mg Vs TLE-600mg in Indian Patients with HIV-1 Infection                                                                                                                                                                      |
| 909                                                                      | NR                             | 2017 | DREAM study                                                                                                                                                                                                                                                                              |
| 910                                                                      | NR                             | 2017 | A study to evaluate the effect of changing HIV medication (from a protease inhibitor or efavirenz to raltegravir) on liver fat, fat tissue and metabolic parameters (blood sugar and cholesterol, etc) in overweight or obese patients with metabolic problems                           |
| 911                                                                      | NR                             | 2017 | This study will test an experimental drug called B/F/TAF (bictegravir/emtricitabine/tenofovir alafenamide) fixed dose combination (FDC) for the treatment of HIV-1 infection. The purpose of this study is to test the effectiveness of switching to B/F/TAF F                           |
| 912                                                                      | NR                             | 2017 | Children with HIV in Africa – pharmacokinetics and acceptability of simple second-line antiretroviral regimens                                                                                                                                                                           |
| 913                                                                      | NR                             | 2017 | Activity of MK-8504 in Anti-retroviral-naïve, Human Immunodeficiency Virus 1 (HIV-1) Infected Participants (MK-8504-002)                                                                                                                                                                 |
| 914                                                                      | NR                             | 2017 | MK-8591 With Doravirine and Lamivudine in Participants Infected With Human Immunodeficiency Virus Type 1 (MK-8591-011)                                                                                                                                                                   |
| 915                                                                      | NR                             | 2017 | UB-421 Combine With Optimized Background Therapy Regimen in Multi-Drug Resistant HIV-1 Infection Patients                                                                                                                                                                                |
| 916                                                                      | NR                             | 2017 | ADVANCE Study of DTG + TAF + FTC vs DTG + TDF + FTC and EFV + TDF+FTC in First-line Antiretroviral Therapy                                                                                                                                                                               |
| 917                                                                      | NR                             | 2017 | Efficacy, Safety and Tolerability Study of Long-acting Cabotegravir Plus Long-acting Rilpivirine (CAB LA + RPV LA) in Human-immunodeficiency Virus-1 (HIV-1) Infected Adults                                                                                                             |
| 918                                                                      | NR                             | 2017 | Switching TDF/FTC/EFV to TDF/FTC/RPV VS Continuing TDF/FTC/EFV in HIV Patients With Complete Virological Suppression                                                                                                                                                                     |
| 919                                                                      | NR                             | 2017 | Effect on Liver Fat and Metabolic Parameters When Switching a Protease Inhibitor or Efavirenz to Raltegravir                                                                                                                                                                             |
| 920                                                                      | NR                             | 2017 | A Phase IV, Open-label, Randomised, Pilot Clinical Trial Designed to Evaluate the Potential Neurotoxicity of Dolutegravir/Lamivudine/Abacavir in Neurosymptomatic HIV Patients and Its Reversibility After Switching to Elvitegravir/Cobicistat/Emtricitabine                            |
| 921                                                                      | NR                             | 2017 | (mo)BETTA Trial in Transwomen for Optimization of ART                                                                                                                                                                                                                                    |
| 922                                                                      | Fabbiani                       | 2018 | Atazanavir/ritonavir with lamivudine as maintenance therapy in virologically suppressed HIV-infected patients: 96 week outcomes of a randomized trial                                                                                                                                    |
| 923                                                                      | Hakim                          | 2018 | Lopinavir plus nucleoside reverse-transcriptase inhibitors, lopinavir plus raltegravir, or lopinavir monotherapy for second-line treatment of HIV (EARNEST): 144-week follow-up results from a randomised controlled trial                                                               |
| 924                                                                      | Li                             | 2018 | Dual therapy with lopinavir/ritonavir plus lamivudine could be a viable alternative for antiretroviral-therapy-naïve adults with HIV-1 infection regardless of HIV viral load or subgenotype in resource-limited settings: A randomised, open-label and non-inferiority study from China |
| 925                                                                      | Jespersen                      | 2018 | Protease Inhibitors or NNRTIs as First-Line HIV-1 Treatment in West Africa (PIONA): A Randomized Controlled Trial                                                                                                                                                                        |

**Table S4 – List of excluded studies by exclusion reason (continuation)**

| Studies excluded for not describing adverse events specifically in women |                                |      |                                                                                                                                                                                                                                                                                                                     |
|--------------------------------------------------------------------------|--------------------------------|------|---------------------------------------------------------------------------------------------------------------------------------------------------------------------------------------------------------------------------------------------------------------------------------------------------------------------|
| Amount                                                                   | First author or research group | Year | Title                                                                                                                                                                                                                                                                                                               |
| 926                                                                      | Amstutz                        | 2018 | SESOTHO trial ("Switch Either near Suppression Or THOUSAND") - switch to second-line versus WHO-guided standard of care for unsuppressed patients on first-line ART with viremia below 1000 copies/mL: protocol of a multicenter, parallel-group, open-label, randomized clinical trial in Lesotho, Southern Africa |
| 927                                                                      | Daar                           | 2018 | Efficacy and safety of switching to fixed-dose bicitegravir, emtricitabine, and tenofovir alafenamide from boosted protease inhibitor-based regimens in virologically suppressed adults with HIV-1: 48 week results of a randomised, open-label, multicentre, phase 3, non-inferiority trial                        |
| 928                                                                      | Winston                        | 2018 | Tenofovir alafenamide plus emtricitabine versus abacavir plus lamivudine for treatment of virologically suppressed HIV-1-infected adults: a randomised, double-blind, active-controlled, non-inferiority phase 3 trial                                                                                              |
| 929                                                                      | Kityo                          | 2018 | Raltegravir-intensified initial antiretroviral therapy in advanced HIV disease in Africa: A randomised controlled trial                                                                                                                                                                                             |
| 930                                                                      | Kumar                          | 2018 | Switch to doravirine/lamivudine/tenofovir disoproxil fumarate (DOR/3TC/TDF) maintains virologic suppression trough 48 weeks: results of the DRIVE-SHIFT trial                                                                                                                                                       |
| 931                                                                      | Margolis                       | 2018 | Safety, efficacy and durability of long-acting CAB and RPV as two-drug im maintenance therapy for HIV-1 infection: IATTE-2 Week 160 results                                                                                                                                                                         |
| 932                                                                      | McComsey                       | 2018 | Switch from tenofovir disoproxil fumarate combination to dolutegravir with rilpivirine improves parameters of bone health                                                                                                                                                                                           |
| 933                                                                      | Molina                         | 2018 | Doravirine versus ritonavir-boosted darunavir in antiretroviral-naive adults with HIV-1 (DRIVE-FORWARD): 48-week results of a randomised, double-blind, phase 3, non-inferiority trial                                                                                                                              |
| 934                                                                      | Molina                         | 2018 | Switching to fixed-dose bicitegravir, emtricitabine, and tenofovir alafenamide from dolutegravir plus abacavir and lamivudine in virologically suppressed adults with HIV-1: 48 week results of a randomised, double-blind, multicentre, active-controlled, phase 3, non-inferiority trial                          |
| 935                                                                      | Pasquau                        | 2018 | High quality of life, treatment tolerability, safety and efficacy in HIV patients switching from triple therapy to lopinavir/ritonavir monotherapy: A randomized clinical trial                                                                                                                                     |
| 936                                                                      | Pett                           | 2018 | Week 96 results of the randomized, multicentre Maraviroc Switch (MARCH) study                                                                                                                                                                                                                                       |
| 937                                                                      | Rasmussen                      | 2018 | The effect of antiretroviral intensification with dolutegravir on residual virus replication in HIV-infected individuals: a randomised, placebo-controlled, double-blind trial                                                                                                                                      |
| 938                                                                      | DeJesus                        | 2018 | Superior Efficacy and Improved Renal and Bone Safety After Switching from a Tenofovir Disoproxil Fumarate- to a Tenofovir Alafenamide-Based Regimen Through 96 Weeks of Treatment                                                                                                                                   |
| 939                                                                      | NR                             | 2018 | Evaluation of the efficacy and safety of integrase inhibitor in the treatment of acute HIV infection                                                                                                                                                                                                                |
| 940                                                                      | NR                             | 2018 | A clinical trial to study the effects of newly marketed antiretroviral drug, Tab. Dolutegravir 50 mg, when given along with other Antiretroviral drugs in HIV1 positive individuals                                                                                                                                 |
| 941                                                                      | NR                             | 2018 | To determine the efficacy, safety and tolerability of two approved medicines, dolutegravir (DTG) plus lamivudine (3TC) taken together as a single tablet, compared with subjects taking their current tenofovir alafenamide (TAF)-based regimen (TBR) for the                                                       |
| 942                                                                      | NR                             | 2018 | An open-label, multi-centre, randomised, switch study to evaluate the virological efficacy over 96 weeks of 2-drug therapy with DTG/RPV FDC in antiretroviral treatment-experienced HIV-1 infected subjects virologically suppressed with NNRTIs resistance mu                                                      |

**Table S4 – List of excluded studies by exclusion reason (continuation)**

| Studies excluded for not describing adverse events specifically in women |                                |      |                                                                                                                                                                                                                                                                                                                   |
|--------------------------------------------------------------------------|--------------------------------|------|-------------------------------------------------------------------------------------------------------------------------------------------------------------------------------------------------------------------------------------------------------------------------------------------------------------------|
| Amount                                                                   | First author or research group | Year | Title                                                                                                                                                                                                                                                                                                             |
| 943                                                                      | NR                             | 2018 | Raltegravir One Thousand two hundred vs Darunavir-cb in Immunosuppressed Patients: ROTDIP Study                                                                                                                                                                                                                   |
| 944                                                                      | NR                             | 2018 | DETOX Study                                                                                                                                                                                                                                                                                                       |
| 945                                                                      | NR                             | 2018 | EFFICACY AND SAFETY OF A SIMPLIFICATION TREATMENT BASED ON DOLUTEGRAVIR AND DARUNAVIR / COBICISTAT VS USUAL TREATMENT IN SUPPRESSED HIV-1-INFECTED PATIENTS WITH MULTIDRUG RESISTANCE                                                                                                                             |
| 946                                                                      | NR                             | 2018 | Dose Ranging Trial of MK-8591 Given in Combination with Doravirine (DOR) and Lamivudine (3TC)                                                                                                                                                                                                                     |
| 947                                                                      | NR                             | 2018 | A phase IV, open-label pilot study investigating non-invasive markers of hepatic fibrosis in people living with HIV-1 and non-alcoholic fatty liver disease randomised to receiving optimised background therapy (OBT) plus maraviroc or OBT                                                                      |
| 948                                                                      | NR                             | 2018 | Single-Dose Study of MK-4250 Monotherapy in Anti-Retroviral Therapy-Naive, Human Immunodeficiency Virus (HIV)-1 Infected Participants (MK-4250-002)                                                                                                                                                               |
| 949                                                                      | NR                             | 2018 | Same-Day Treatment With Genvoya vs. EFV/TDF/3TC                                                                                                                                                                                                                                                                   |
| 950                                                                      | NR                             | 2018 | Safety, Pharmacokinetics, and Antiviral Activity of GS-6207 Administered Subcutaneously in HIV-1 Infected Adults                                                                                                                                                                                                  |
| 951                                                                      | NR                             | 2018 | The HIV Functional Cure Potential of UB-421 in ART Stabilized HIV-1 Patients                                                                                                                                                                                                                                      |
| 952                                                                      | NR                             | 2018 | A Proof of Concept Study of GSK3640254 in Human Immunodeficiency Virus-1 (HIV-1) Infected Treatment-naive Adults                                                                                                                                                                                                  |
| 953                                                                      | NR                             | 2018 | Albuvirtide and 3BNC117 as Long-Acting Maintenance Therapy in Virologically Suppressed Subjects                                                                                                                                                                                                                   |
| 954                                                                      | NR                             | 2018 | Evaluating Long-Acting Antiretroviral Therapy in Non-Adherent HIV-1 Infected Individuals                                                                                                                                                                                                                          |
| 955                                                                      | NR                             | 2018 | A Clinical Trial to Evaluate the Reversibility of Abacavir/Lamivudine/Dolutegravir CNS-Related Neurotoxicity After Switching to Tenofovir/Alafenamide/Emtricitabine/Darunavir/Cobicistat (TAF/FTC/DRV/c)                                                                                                          |
| 956                                                                      | NR                             | 2018 | Switch From Dual Regimens Based on Dolutegravir Plus a Reverse Transcriptase Inhibitor to E/C/F/TAF in Virologically Suppressed, HIV-1 Infected Patients (Be-OnE)                                                                                                                                                 |
| 957                                                                      | NR                             | 2018 | Switch Study to Evaluate Dolutegravir Plus Lamivudine in Virologically Suppressed Human Immunodeficiency Virus Type 1 Positive Adults (TANGO)                                                                                                                                                                     |
| 958                                                                      | Maggiolo                       | 2019 | Bone mineral density in virologically suppressed people aged 60 years or older with HIV-1 switching from a regimen containing tenofovir disoproxil fumarate to an elvitegravir, cobicistat, emtricitabine, and tenofovir alafenamide single-tablet regimen: a multicentre, open-label, phase 3b, randomised trial |
| 959                                                                      | Hocqueloux                     | 2019 | Dolutegravir Monotherapy Versus Dolutegravir/Abacavir/Lamivudine for Virologically Suppressed People Living With Chronic Human Immunodeficiency Virus Infection: The Randomized Noninferiority MONotherapy of TiviCAY Trial                                                                                       |
| 960                                                                      | Rizzardini                     | 2019 | Randomized study evaluating the efficacy and safety of switching from an an abacavir/lamivudine-based regimen to an elvitegravir/cobicistat/emtricitabine/tenofovir alafenamide single-tablet regimen                                                                                                             |
| 961                                                                      | Gatell                         | 2019 | Doravirine dose selection and 96-week safety and efficacy versus efavirenz in antiretroviral therapy-naive adults with HIV-1 infection in a Phase IIb trial                                                                                                                                                       |

**Table S4 – List of excluded studies by exclusion reason (continuation)**

| Studies excluded for not describing adverse events specifically in women |                                |      |                                                                                                                                                                                                                                                                |
|--------------------------------------------------------------------------|--------------------------------|------|----------------------------------------------------------------------------------------------------------------------------------------------------------------------------------------------------------------------------------------------------------------|
| Amount                                                                   | First author or research group | Year | Title                                                                                                                                                                                                                                                          |
| 962                                                                      | Aboud                          | 2019 | Dolutegravir versus ritonavir-boosted lopinavir both with dual nucleoside reverse transcriptase inhibitor therapy in adults with HIV-1 infection in whom first-line therapy has failed (DAWNING): an open-label, non-inferiority, phase 3b trial               |
| 963                                                                      | Braun                          | 2019 | Noninferiority of Simplified Dolutegravir Monotherapy Compared to Continued Combination Antiretroviral Therapy That Was Initiated During Primary Human Immunodeficiency Virus Infection: a Randomized, Controlled, Multisite, Open-label, Noninferiority Trial |
| 964                                                                      | Venter                         | 2019 | Efficacy and Safety of Tenofovir Disoproxil Fumarate Versus Low-Dose Stavudine Over 96 Weeks: A Multicountry Randomized, Noninferiority Trial                                                                                                                  |
| 965                                                                      | Venter                         | 2019 | The ADVANCE trial: phase 3, randomized comparison of TAF/FTC/DTG, TDF/FTC/DTG or TDF/FTC/EFV for firstline treatment of HIV-1 infection                                                                                                                        |
| 966                                                                      | Wiriyatanakorn                 | 2019 | Switching Tenofovir/Emtricitabine/Efavirenz (TDF/FTC/EFV) to TDF/FTC/Rilpivirine vs Continuing TDF/FTC/EFV in HIV-Infected Patients With Virological Suppression: A Randomized Controlled Trial                                                                |
| 967                                                                      | Johnson                        | 2019 | Switching to Doravirine/Lamivudine/Tenofovir Disoproxil Fumarate (DOR/3TC/TDF) Maintains HIV-1 Virologic Suppression Through 48 Weeks: Results of the DRIVE-SHIFT Trial                                                                                        |
| 968                                                                      | Maggiolo                       | 2019 | RPV+DRV/cobi as 2DR option in HIV-infected subjects on virologic suppression                                                                                                                                                                                   |
| 969                                                                      | Munderi                        | 2019 | Switching at low HIV-1 RNA into fixed dose combinations: TDF/FTC/RPV is non-inferior to TDF/FTC/ EFV in first-line suppressed patients living with HIV                                                                                                         |
| 970                                                                      | Murray                         | 2019 | Patient-reported tolerability and acceptability of cabotegravir + rilpivirine long-acting injections for the treatment of HIV-1 infection: 96-week results from the randomized LATTE-2 study                                                                   |
| 971                                                                      | Mussini                        | 2019 | A prospective randomized trial on abacavir/lamivudine plus darunavir/ritonavir or raltegravir in HIV-positive drug-naïve patients with CD4<200 cells/uL (the PRADAR study)                                                                                     |
| 972                                                                      | Orkin                          | 2019 | Doravirine/Lamivudine/Tenofovir disoproxil fumarate is non-inferior to efavirenz/emtricitabine/tenofovir disoproxil fumarate in treatment-naïve adults with human immunodeficiency virus-1 infection: Week 48 results of the DRIVE-AHEAD Trial                 |
| 973                                                                      | Kouanfack                      | 2019 | Dolutegravir-Based or Low-Dose Efavirenz-Based Regimen for the Treatment of HIV-1                                                                                                                                                                              |
| 974                                                                      | NR                             | 2019 | Dual therapy with lopinavir/ritonavir plus lamivudine could be an effective alternative for antiretroviral-therapy-naïve adults with HIV-1 infection in resource-limited settings: planned 144 week, a randomized, open-label and non-inferiority study from C |
| 975                                                                      | NR                             | 2019 | A Study to Assess the Acceptability of Scored Film-coated darunavir/cobicistat/emtricitabine/tenofovir alafenamide (D/C/F/TAF) Fixed-dose Combination (FDC) Tablets in HIV-1 Infected Pediatric Participants (Aged =6 to <12 years), Using Matching Placebo Ta |
| 976                                                                      | NR                             | 2019 | Randomized, double blind, safety, efficacy Doravirine/Islatravir in Treatment naïve                                                                                                                                                                            |
| 977                                                                      | NR                             | 2019 | ANRS 173 ALTAR (ALIA@gement du Traitement AntiRA@troviral)                                                                                                                                                                                                     |
| 978                                                                      | NR                             | 2019 | The RIO Trial: a randomised placebo controlled trial of ART plus dual long-acting HIV-specific broadly neutralising antibodies (bNAbs) vs ART plus placebo in treated Primary HIV Infection on viral control off ART                                           |
| 979                                                                      | NR                             | 2019 | Will switching HIV-1-infected patients who have drug resistant HIV and stable on a regimen based on a protease inhibitor to another regimen based on the integrase inhibitor bictegravir be as equally effective?                                              |

**Table S4 – List of excluded studies by exclusion reason (continuation)**

| Studies excluded for not describing adverse events specifically in women |                                |      |                                                                                                                                                                                                                                                                                                                                                           |
|--------------------------------------------------------------------------|--------------------------------|------|-----------------------------------------------------------------------------------------------------------------------------------------------------------------------------------------------------------------------------------------------------------------------------------------------------------------------------------------------------------|
| Amount                                                                   | First author or research group | Year | Title                                                                                                                                                                                                                                                                                                                                                     |
| 980                                                                      | NR                             | 2019 | To determine the efficacy, safety and tolerability of two approved medicines, dolutegravir (DTG) plus lamivudine (3TC) taken together as a single tablet, compared with subjects taking their current antiretroviral therapy regimen (CAR) for the treatment o                                                                                            |
| 981                                                                      | NR                             | 2019 | Dolutegravir plus tenofovir alafenamide as a double-drug regimen in HIV positive patients                                                                                                                                                                                                                                                                 |
| 982                                                                      | NR                             | 2019 | Combining TLR9 Agonist With bNAbs for Reservoir Reduction and Immunological Control of HIV                                                                                                                                                                                                                                                                |
| 983                                                                      | NR                             | 2019 | A Drug Safety and Dose-exploratory Clinical Study of Azvudine Tablets in Patients Who Have Not Received Anti-HIV Treatment                                                                                                                                                                                                                                |
| 984                                                                      | NR                             | 2019 | RPV+DRV/Cobi Dual Therapy in Subjects With HIV Controlled Infection                                                                                                                                                                                                                                                                                       |
| 985                                                                      | NR                             | 2019 | Study to Evaluate the Safety and Efficacy of GS-6207 in Combination With Other Antiretroviral Agents in People Living With HIV                                                                                                                                                                                                                            |
| 986                                                                      | NR                             | 2019 | Regimen Switch to Dolutegravir/Lamivudine Fixed Dose Combination From Current Antiretroviral Regimen in HIV-1 Infected and Virologically Suppressed Adults (SALSA)                                                                                                                                                                                        |
| 987                                                                      | NR                             | 2019 | Tenofovir/Lamivudine/Dolutegravir Combination as Second Line ART: a Randomised Controlled Trial (ARTIST)                                                                                                                                                                                                                                                  |
| 988                                                                      | NR                             | 2019 | VISEND                                                                                                                                                                                                                                                                                                                                                    |
| 989                                                                      | NR                             | 2019 | Lopinavir/r/ Lamivudine/ Abacavir as an Easy to Use Paediatric Formulation (LOLIPOP)                                                                                                                                                                                                                                                                      |
| 990                                                                      | Guo                            | 2020 | Antiretroviral Long-Term Efficacy and Resistance of Lopinavir/Ritonavir Plus Lamivudine in HIV-1-Infected Treatment-Naïve Patients (ALTERLL): 144-Week Results of a Randomized, Open-Label, Non-Inferiority Study From Guangdong, China                                                                                                                   |
| 991                                                                      | Lévy                           | 2020 | Addition of Maraviroc Versus Placebo to Standard Antiretroviral Therapy for Initial Treatment of Advanced HIV Infection: A Randomized Trial                                                                                                                                                                                                               |
| 992                                                                      | Di Cristo                      | 2020 | 96-week results of a dual therapy with darunavir/ritonavir plus rilpivirine once a day vs triple therapy in patients with suppressed viraemia: virological success and non-HIV related morbidity evaluation                                                                                                                                               |
| 993                                                                      | Iwuji                          | 2020 | A phase IV randomised, open-label pilot study to evaluate switching from protease-inhibitor based regimen to Bictegravir/Emtricitabine/Tenofovir Alafenamide single tablet regimen in Integrase inhibitor-naïve, virologically suppressed HIV-1 infected adults harbouring drug resistance mutations (PIBIK study): study protocol for a randomised trial |
| 994                                                                      | Amstutz                        | 2020 | Switch to second-line versus continued first-line antiretroviral therapy for patients with low-level HIV-1 viremia: An open-label randomized controlled trial in Lesotho                                                                                                                                                                                  |
| 995                                                                      | Schürmann                      | 2020 | Safety, pharmacokinetics, and antiretroviral activity of islatravir (ISL, MK-8591), a novel nucleoside reverse transcriptase translocation inhibitor, following single-dose administration to treatment-naïve adults infected with HIV-1: an open-label, phase 1b, consecutive-panel trial                                                                |
| 996                                                                      | Sculier                        | 2020 | Efficacy and safety of dolutegravir plus emtricitabine versus standard ART for the maintenance of HIV-1 suppression: 48-week results of the factorial, randomized, non-inferiority SIMPL'HIV trial                                                                                                                                                        |
| 997                                                                      | Spinner                        | 2020 | Efficacy and Safety of Switching to Dolutegravir With Boosted Darunavir in Virologically Suppressed Adults With HIV-1: A Randomized, Open-Label, Multicenter, Phase 3, Noninferiority Trial: The DUALIS Study                                                                                                                                             |
| 998                                                                      | Swindells                      | 2020 | Long-Acting Cabotegravir and Rilpivirine for Maintenance of HIV-1 Suppression                                                                                                                                                                                                                                                                             |

**Table S4 – List of excluded studies by exclusion reason (continuation)**

| Studies excluded for not describing adverse events specifically in women |                                |      |                                                                                                                                                                                                                                                                                                             |
|--------------------------------------------------------------------------|--------------------------------|------|-------------------------------------------------------------------------------------------------------------------------------------------------------------------------------------------------------------------------------------------------------------------------------------------------------------|
| Amount                                                                   | First author or research group | Year | Title                                                                                                                                                                                                                                                                                                       |
| 999                                                                      | Swindells                      | 2020 | Cabotegravir + rilpivirine long-acting as HIV-1 maintenance therapy: ATLAS Week 96 results                                                                                                                                                                                                                  |
| 1000                                                                     | van Wyk                        | 2020 | Efficacy and Safety of Switching to Dolutegravir/Lamivudine Fixed-Dose 2-Drug Regimen vs Continuing a Tenofovir Alafenamide-Based 3- or 4-Drug Regimen for Maintenance of Virologic Suppression in Adults Living With Human Immunodeficiency Virus Type 1: Phase 3, Randomized, Noninferiority TANGO Study  |
| 1001                                                                     | Van Wyk                        | 2020 | Switching to DTG/3TC fixed-dose combination (FDC) is non-inferior to continuing a TAF-based regimen (TBR) in maintaining virologic suppression through 96 weeks (TANGO study)                                                                                                                               |
| 1002                                                                     | Venter                         | 2020 | Dolutegravir with emtricitabine and tenofovir alafenamide or tenofovir disoproxil fumarate versus efavirenz, emtricitabine, and tenofovir disoproxil fumarate for initial treatment of HIV-1 infection (ADVANCE): week 96 results from a randomised, phase 3, non-inferiority trial                         |
| 1003                                                                     | Wyk                            | 2020 | Efficacy and Safety of Switching to Dolutegravir/ Lamivudine Fixed-Dose 2-Drug Regimen vs Continuing a Tenofovir Alafenamide-Based 3- or 4-Drug Regimen for Maintenance of Virologic Suppression in Adults Living With Human Immunodeficiency Virus Type 1: Phase 3, Randomized, Noninferiority TANGO Study |
| 1004                                                                     | Molina                         | 2020 | Doravirine versus ritonavir-boosted darunavir in antiretroviral-naive adults with HIV-1 (DRIVE-FORWARD): 96-week results of a randomised, double-blind, non-inferiority, phase 3 trial                                                                                                                      |
| 1005                                                                     | Orkin                          | 2020 | Long-Acting Cabotegravir and Rilpivirine after Oral Induction for HIV-1 Infection                                                                                                                                                                                                                           |
| 1006                                                                     | Orkin                          | 2020 | Doravirine/Lamivudine/Tenofovir Disoproxil Fumarate (TDF) Versus Efavirenz/Emtricitabine/TDF in Treatment-naive Adults With Human Immunodeficiency Virus Type 1 Infection: Week 96 Results of the Randomized, Double-blind, Phase 3 DRIVE-AHEAD Noninferiority Trial                                        |
| 1007                                                                     | Palanuphap                     | 2020 | Switching protease inhibitors to rilpivirine in HIV-positive individuals with complete viral suppression and without prior HIV drug resistance in a resource-limited setting: a randomized controlled trial                                                                                                 |
| 1008                                                                     | Raffi                          | 2020 | Five-year follow-up of patients enrolled in the NEAT 001/ANRS 143 randomized clinical trial: NEAT 001/ANRS 143 LONG TERM study                                                                                                                                                                              |
| 1009                                                                     | Calmy                          | 2020 | Dolutegravir-based and low-dose efavirenz-based regimen for the initial treatment of HIV-1 infection (NAMSAL): week 96 results from a two-group, multicentre, randomised, open label, phase 3 non-inferiority trial in Cameroon                                                                             |
| 1010                                                                     | NR                             | 2020 | A Drug Safety and Dose-exploratory Clinical Study of Azvudine Tablets in Patients Who Have Not Received Anti-HIV Treatment (FNC)                                                                                                                                                                            |
| 1011                                                                     | NR                             | 2020 | Clinical Study to evaluate a switch to Doravirine/Islatravir in Participants with HIV-1 Virologically Suppressed on treatment with Bictegravir/Emtricitabine/Tenofovir Alafenamide                                                                                                                          |
| 1012                                                                     | NR                             | 2020 | Study to see the changes in body weight and body composition of a darunavir/cobicistat based treatment in HIV-infected people who have gained weight during a dolutegravir-based treatment                                                                                                                  |
| 1013                                                                     | NR                             | 2020 | Doravirine/Islatravir in heavily treatment-experienced participants                                                                                                                                                                                                                                         |
| 1014                                                                     | NR                             | 2020 | A study looking at the effects of switching anti-HIV therapy in people with HIV who have difficulty sleeping                                                                                                                                                                                                |
| 1015                                                                     | NR                             | 2020 | A clinical trial that evaluates safety, tolerability, pharmacokinetics, and pharmacodynamic characteristics after oral administration of investigational product(AVI-CO-004Tab) 10 days to male volunteers with AIDS                                                                                        |

**Table S4 – List of excluded studies by exclusion reason (continuation)**

| Studies excluded for not describing adverse events specifically in women                   |                                |      |                                                                                                                                                                                                                                |
|--------------------------------------------------------------------------------------------|--------------------------------|------|--------------------------------------------------------------------------------------------------------------------------------------------------------------------------------------------------------------------------------|
| Amount                                                                                     | First author or research group | Year | Title                                                                                                                                                                                                                          |
| 1016                                                                                       | NR                             | 2020 | Randomized, Double-blind, Efficacy, and Safety Study of Doravirine/Islatravir (DOR/ISL) in Treatment-naïve Participants With Human Immunodeficiency Virus Type 1 (HIV-1) Infection (MK-8591A-020)                              |
| 1017                                                                                       | NR                             | 2020 | Phase III Clinical Study of Azvudine in Hiv-infected Treatment Naive Patients                                                                                                                                                  |
| 1018                                                                                       | NR                             | 2020 | Safety and Efficacy of a Switch to Doravirine/Islatravir in Participants With HIV-1 (MK-8591A-017))                                                                                                                            |
| 1019                                                                                       | NR                             | 2020 | A Study of Darunavir/Cobicistat/Emtricitabine/Tenofovir Alafenamide (D/C/F/TAF) Evaluated as a Fixed Dose Combination Regimen in Participants Switching From an Integrase Inhibitor Who Have Experienced Rapid Weight Gain     |
| 1020                                                                                       | NR                             | 2020 | The HIV Functional Cure Potential of UB-421 in ART Stabilized HIV-1 Patients                                                                                                                                                   |
| 1021                                                                                       | NR                             | 2020 | A Study to Evaluate Efficacy and Safety of Cabotegravir (CAB) Long Acting (LA) Plus (+) Rilpivirine (RPV) LA Versus BIKTARVY® (BIK) in Participants With Human Immunodeficiency Virus (HIV)-1 Who Are Virologically Suppressed |
| 1022                                                                                       | NR                             | 2020 | Efficacy of Efavirenz 400mg vs. 600mg Combined With Lamivudine and Tenofovir in Treatment Naive HIV Infection                                                                                                                  |
| 1023                                                                                       | NR                             | 2020 | DTG/3TC Fixed Dose Formulations for the Maintenance of Virological Suppression in Children With HIV Infection Aged 2 to <15 Years Old                                                                                          |
| 1024                                                                                       | NR                             | 2020 | Continuation of Protease-Inhibitor Based Second-Line Therapy vs. Switch to B/F/TAF in Virologically Suppressed Adults                                                                                                          |
| 1025                                                                                       | NR                             | 2020 | Rapid Start vs. Standard Start Antiretroviral Therapy (ART) in HIV                                                                                                                                                             |
| 1026                                                                                       | NR                             | 2020 | Doravirine for Persons With Excessive Weight Gain on Integrase Inhibitors and Tenofovir Alafenamide                                                                                                                            |
| 1027                                                                                       | NR                             | 2020 | Study to Assess Adverse Events and How Intravenous (IV) or Subcutaneous (SC) ABBV-382 Moves Through the Body of Adult Participants With Human Immuno-Deficiency Virus (HIV-1)                                                  |
| 1028                                                                                       | Molina                         | 2021 | Islatravir in combination with doravirine for treatment-naïve adults with HIV-1 infection receiving initial treatment with islatravir, doravirine, and lamivudine: a phase 2b, randomised, double-blind, dose-ranging trial    |
| 1029                                                                                       | Orkin                          | 2021 | Long-acting cabotegravir plus rilpivirine for treatment in adults with HIV-1 infection: 96-week results of the randomised, open-label, phase 3 FLAIR study                                                                     |
| Studies excluded because the full text is not available, even after contacting researchers |                                |      |                                                                                                                                                                                                                                |
| Amount                                                                                     | First author or research group | Year | Title                                                                                                                                                                                                                          |
| 1                                                                                          | NR                             | 1989 | Antiviral trial conducted                                                                                                                                                                                                      |
| 2                                                                                          | Vesterdal                      | 1989 | AIDS. Trial with Retrovir for HIV-positive subjects                                                                                                                                                                            |
| 3                                                                                          | Demonty                        | 1993 | [Antiretroviral therapy]                                                                                                                                                                                                       |
| 4                                                                                          | NR                             | 1995 | [The safety and efficacy of saquinavir in the therapy of HIV infection]                                                                                                                                                        |
| 5                                                                                          | Staszewski                     | 1996 | Evaluation of the efficacy and tolerance of R 018893, R 089439 (loviride) and placebo in asymptomatic HIV-1-infected patients. Loviride Collaborative Study Group                                                              |
| 6                                                                                          | Vella                          | 1996 | A randomized controlled trial of a protease inhibitor (saquinavir) in combination with zidovudine in previously untreated patients with advanced HIV infection                                                                 |
| 7                                                                                          | Pollard                        | 1997 | Randomized double-blind study of combination therapy with didanosine and stavudine in HIV-infected individuals                                                                                                                 |

**Table S4 – List of excluded studies by exclusion reason (conclusion)**

| Studies excluded because the full text is not available, even after contacting researchers |                                |      |                                                                                                                                                                                                                                                       |
|--------------------------------------------------------------------------------------------|--------------------------------|------|-------------------------------------------------------------------------------------------------------------------------------------------------------------------------------------------------------------------------------------------------------|
| Amount                                                                                     | First author or research group | Year | Title                                                                                                                                                                                                                                                 |
| 8                                                                                          | Moyle                          | 1997 | Zidovudine monotherapy versus zidovudine plus zalcitabine combination therapy in HIV-positive persons with CD4 cell counts 300-500 cells/mm <sup>3</sup> : a double-blind controlled trial. The M50003 Study Group Coordinating and Writing Committee |
| 9                                                                                          | Saimot                         | 1997 | Ritonavir, stavudine and didanosine as first-line tritherapy in HIV-1-infected individuals: Results of an ongoing open-label trial                                                                                                                    |
| 10                                                                                         | Angarano                       | 1997 | A randomized double-blind study of virological, clinical and safety effects of a combination of stavudine and didanosine versus zidovudine and didanosine in treatment-naive HIV-infected individuals                                                 |
| 11                                                                                         | Raffi                          | 1998 | Stavudine plus didanosine and nevirapine in antiretroviral-naive HIV-infected adults: Preliminary safety and efficacy results                                                                                                                         |
| 12                                                                                         | Molina                         | 1999 | Results of the ALBI trial: A randomized comparison of stavudine/didanosine, zidovudine/lamivudine and alternating treatment in antiretroviral-naive patients                                                                                          |
| 13                                                                                         | Murphy                         | 1999 | Stavudine, lamivudine plus novel protease inhibitor therapy in antiretroviral-naive HIV-infected individuals treated for 24 weeks                                                                                                                     |
| 14                                                                                         | Staszewski                     | 1999 | Update on study 006--EFV + AZT + 3TC versus the current 'standard of care' IDV + AZT + 3TC                                                                                                                                                            |
| 15                                                                                         | Saez-Llorens                   | 2000 | Ziagen (Abacavir, ABC) combined with 3TC & ZDV is safe and effective through 48 weeks in HIV-1 infected antiretroviral therapy-experienced children (CNA3006)                                                                                         |
| 16                                                                                         | NR                             | 2001 | No adverse effects in infants following short-course zidovudine                                                                                                                                                                                       |
| 17                                                                                         | Wagner                         | 2001 | Rand Corp. study seeks participants                                                                                                                                                                                                                   |
| 18                                                                                         | Dobkin                         | 2002 | Tenofovir: the first nucleotide for HIV infection                                                                                                                                                                                                     |
| 19                                                                                         | NR                             | 2003 | [96-week treatment outcome confirms long term efficacy of tenofovir DF]                                                                                                                                                                               |
| 20                                                                                         | Blasko                         | 2003 | [HIV-1 fusion inhibitor improves treatment in HIV-1-resistant patients]                                                                                                                                                                               |
| 21                                                                                         | Moyle                          | 2005 | The role of zidovudine in development of lipoatrophy                                                                                                                                                                                                  |
| 22                                                                                         | Smith                          | 2006 | The long-term consequences of antiretroviral therapy                                                                                                                                                                                                  |
| 23                                                                                         | Coleman                        | 2007 | A comparison of different protease inhibitors on coronary heart disease risk                                                                                                                                                                          |

NR = not reported; ART = antiretroviral therapy; ARV = antiretroviral
