# Supplementary material for: Rates of adverse events of antiretroviral therapy in women living with HIV/AIDS: a systematic review and meta-analysis
Source: PubMed Central journal article supplement — BMJ Open. 2024 Jul 31;14(7):e079292. doi: 10.1136/bmjopen-2023-079292 (PMC11293376; doi:10.1136/bmjopen-2023-079292), 2024-07-31
Supplement: bmjopen-14-7-s007.pdf [file bmjopen-14-7-s007.pdf]

## Bias of publication

Figura S1 – Funnel plot for discontinuation due to adverse events

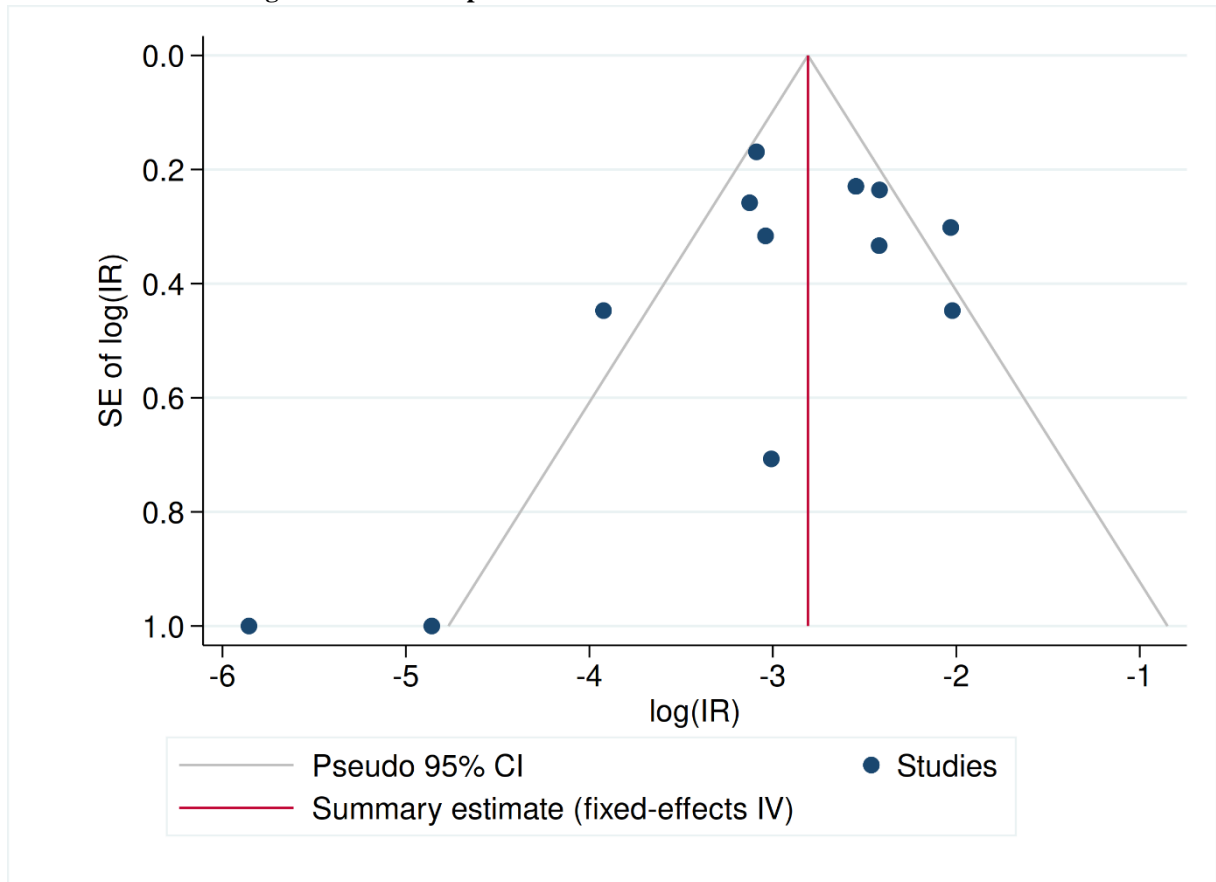

IR = incidence rate.

Figura S2 – Funnel plot for clinical and laboratory serious adverse events

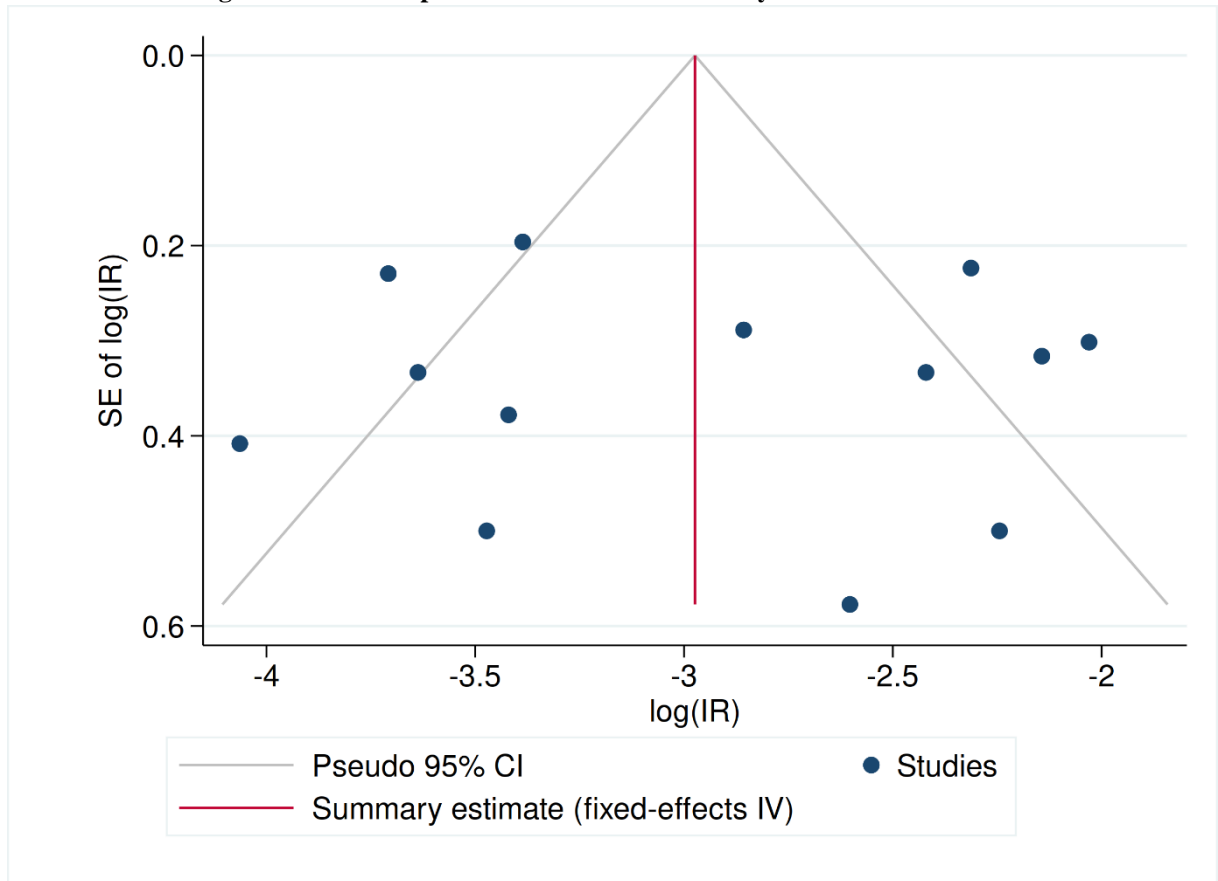

IR = incidence rate.
