# Supplementary material for: Rates of adverse events of antiretroviral therapy in women living with HIV/AIDS: a systematic review and meta-analysis
Source: PubMed Central journal article supplement — BMJ Open. 2024 Jul 31;14(7):e079292. doi: 10.1136/bmjopen-2023-079292 (PMC11293376; doi:10.1136/bmjopen-2023-079292), 2024-07-31
Supplement: bmjopen-14-7-s008.pdf [file bmjopen-14-7-s008.pdf]

## Study outcomes

**Table S5 – Adverse events reported by studies (to be continued)**

| Osteoporosis from adverse events                                                                          |                      |                 |                                                     |                            |
|-----------------------------------------------------------------------------------------------------------|----------------------|-----------------|-----------------------------------------------------|----------------------------|
| ART                                                                                                       | Number of study arms | Number of women | Incidence rate (number of events/1000 person-years) | Credibility interval (95%) |
| Dolutegravir/Abacavir/Lamivudine 50/600/300 mg/day                                                        | 1                    | 59              | 6,15                                                | 0,01 - 4037,00             |
| Discontinuation or dropouts/withdrawals due to adverse events                                             |                      |                 |                                                     |                            |
| ART                                                                                                       | Number of study arms | Number of women | Incidence rate (number of events/1000 person-years) | Credibility interval (95%) |
| Elvitegravir/Cobicistat/Emtricitabine/Tenofovir disoproxil fumarate 150/150/200/300 mg/day                | 1                    | 289             | 18,05                                               | 0,03 - 9868,95             |
| Atazanavir 300 mg/day + Ritonavir 100 mg/day + Emtricitabine/Tenofovir disoproxil fumarate 200/300 mg/day | 2                    | 533             | 81,97                                               | 4,16 - 1611,00             |
| Dolutegravir/Abacavir/Lamivudine 50/600/300 mg/day                                                        | 2                    | 307             | 61,58                                               | 2,14 - 1797,00             |
| Nevirapine 200 mg 12/12h + Emtricitabine/Tenofovir disoproxil fumarate 200/300 mg/day                     | 2                    | 370             | 44,25                                               | 2,38 - 838,60              |
| Lopinavir/Ritonavir 400/100 mg 12/12h + Emtricitabine/Tenofovir disoproxil fumarate 200/300 mg/day        | 2                    | 371             | 0,31                                                | 0,00 - 29,70               |
| Darunavir/Cobicistat/Emtricitabine/Tenofovir alafenamide 800/150/200/10 mg/day                            | 2                    | 184             | 15,41                                               | 0,21 - 876,59              |
| Darunavir/Cobicistat 800/150 mg/day + Emtricitabine/Tenofovir disoproxil fumarate 200/300 mg/day          | 1                    | 41              | 121,30                                              | 0,21 - 67219,50            |
| Bictegravir/Emtricitabine/Tenofovir alafenamide 50/200/25 mg/day                                          | 1                    | 234             | 0,00                                                | 0,00 - 0,20                |
| Efavirenz 600 mg/day + Tenofovir disoproxil fumarate 300 mg/day + Lamivudine 300 mg/day                   | 1                    | 29              | 0,00                                                | 0,00 - 0,48                |
| Efavirenz 600 mg/day + Lamivudine/Zidovudine 150/300 mg 12/12h                                            | 1                    | 30              | 126,40                                              | 0,23 - 69389,00            |
| All treatments                                                                                            | 15                   | 2388            | 20,78                                               | 5,58 - 57,31               |
| Discontinuation or dropouts/withdrawals due to ART-related adverse events                                 |                      |                 |                                                     |                            |
| ART                                                                                                       | Number of study arms | Number of women | Incidence rate (number of events/1000 person-years) | Credibility interval (95%) |
| Nevirapine 200 mg 12/12h + Emtricitabine/Tenofovir disoproxil fumarate 200/300 mg/day                     | 1                    | 249             | 44,89                                               | 0,09 - 24219,50            |

**Table S5 – Adverse events reported by studies (continuation)**

| Discontinuation or dropouts/withdrawals due to ART-related adverse events                               |                      |                 |                                                     |                            |
|---------------------------------------------------------------------------------------------------------|----------------------|-----------------|-----------------------------------------------------|----------------------------|
| ART                                                                                                     | Number of study arms | Number of women | Incidence rate (number of events/1000 person-years) | Credibility interval (95%) |
| Lopinavir/Ritonavir 400/100 mg 12/12h + Emtricitabine/Tenofovir disoproxil fumarate 200/300 mg/day      | 1                    | 251             | 0,00                                                | 0,00 - 0,06                |
| Darunavir/Cobicistat/Emtricitabine/Tenofovir alafenamide 800/150/200/10 mg/day                          | 2                    | 184             | 15,41                                               | 0,21 - 876,59              |
| Darunavir/Cobicistat 800/150 mg/day + Emtricitabine/Tenofovir disoproxil fumarate 200/300 mg/day        | 1                    | 41              | 121,30                                              | 0,21 - 67219,50            |
| Bictegravir/Emtricitabine/Tenofovir alafenamide 50/200/25 mg/day                                        | 1                    | 234             | 0,00                                                | 0,00 - 0,20                |
| Efavirenz 600 mg/day + Tenofovir disoproxil fumarate 300 mg/day + Lamivudine 300 mg/day                 | 1                    | 29              | 0,00                                                | 0,00 - 0,48                |
| All treatments                                                                                          | 7                    | 988             | 4,31                                                | 0,13 - 54,72               |
| Clinical and/or laboratory adverse events                                                               |                      |                 |                                                     |                            |
| ART                                                                                                     | Number of study arms | Number of women | Incidence rate (number of events/1000 person-years) | Credibility interval (95%) |
| Atazanavir 300 /day + Ritonavir 100 mg/day + Emtricitabine/Tenofovir disoproxil fumarate 200/300 mg/day | 1                    | 247             | 972,10                                              | 1,82 - 511395,00           |
| Dolutegravir/Abacavir/Lamivudine 50/600/300 mg/day                                                      | 1                    | 248             | 933,00                                              | 1,69 - 498690,00           |
| Darunavir/Cobicistat/Emtricitabine/Tenofovir alafenamide 800/150/200/10 mg/day                          | 2                    | 184             | 922,90                                              | 56,88 - 15170,00           |
| Darunavir/Cobicistat 800/150 mg/day + Emtricitabine/Tenofovir disoproxil fumarate 200/300 mg/day        | 1                    | 41              | 913,40                                              | 1,67 - 482400,00           |
| Bictegravir/Emtricitabine/Tenofovir alafenamide 50/200/25 mg/day                                        | 1                    | 234             | 718,40                                              | 1,35 - 375995,00           |
| All treatments                                                                                          | 6                    | 954             | 888,20                                              | 759,90 - 1045,00           |
| Clinical and/or laboratory adverse events related to ART                                                |                      |                 |                                                     |                            |
| ART                                                                                                     | Number of study arms | Number of women | Incidence rate (number of events/1000 person-years) | Credibility interval (95%) |
| Atazanavir 300 /day + Ritonavir 100 mg/day + Emtricitabine/Tenofovir disoproxil fumarate 200/300 mg/day | 1                    | 247             | 594,80                                              | 1,10 - 318800,00           |
| Dolutegravir/Abacavir/Lamivudine 50/600/300 mg/day                                                      | 1                    | 248             | 395,20                                              | 0,73 - 211000,00           |

**Table S5 – Adverse events reported by studies (continuation)**

| Clinical and/or laboratory adverse events related to ART                                                |                      |                 |                                                     |                            |
|---------------------------------------------------------------------------------------------------------|----------------------|-----------------|-----------------------------------------------------|----------------------------|
| ART                                                                                                     | Number of study arms | Number of women | Incidence rate (number of events/1000 person-years) | Credibility interval (95%) |
| Darunavir/Cobicistat/Emtricitabine/Tenofovir alafenamide 800/150/200/10 mg/day                          | 2                    | 184             | 357,80                                              | 8,25 - 15370,00            |
| Darunavir/Cobicistat 800/150 mg/day + Emtricitabine/Tenofovir disoproxil fumarate 200/300 mg/day        | 1                    | 41              | 545,80                                              | 0,99 - 304395,00           |
| Bictegravir/Emtricitabine/Tenofovir alafenamide 50/200/25 mg/day                                        | 1                    | 234             | 91,31                                               | 0,17 - 49459,50            |
| All treatments                                                                                          | 6                    | 954             | 341,60                                              | 133,60 - 862,70            |
| Clinical adverse events related to ART                                                                  |                      |                 |                                                     |                            |
| ART                                                                                                     | Number of study arms | Number of women | Incidence rate (number of events/1000 person-years) | Credibility interval (95%) |
| Elvitegravir/Cobicistat/Emtricitabine/Tenofovir disoproxil fumarate 150/150/200/300 mg/day              | 1                    | 289             | 322,40                                              | 0,60 - 174800,00           |
| Atazanavir 300 /day + Ritonavir 100 mg/day + Emtricitabine/Tenofovir disoproxil fumarate 200/300 mg/day | 1                    | 286             | 570,60                                              | 1,07 - 315895,00           |
| All treatments                                                                                          | 2                    | 575             | 431,50                                              | 13,84 - 13630,00           |
| Grade 3 and/or 4 clinical and/or laboratory adverse events                                              |                      |                 |                                                     |                            |
| ART                                                                                                     | Number of study arms | Number of women | Incidence rate (number of events/1000 person-years) | Credibility interval (95%) |
| Darunavir/Cobicistat/Emtricitabine/Tenofovir alafenamide 800/150/200/10 mg/day                          | 2                    | 184             | 80,75                                               | 3,16 - 2072,00             |
| Darunavir/Cobicistat 800/150 mg/day + Emtricitabine/Tenofovir disoproxil fumarate 200/300 mg/day        | 1                    | 41              | 95,23                                               | 0,17 - 53989,50            |
| Efavirenz 600 mg/day + Tenofovir disoproxil fumarate 300 mg/day + Lamivudine 300 mg/day                 | 1                    | 29              | 77,39                                               | 0,14 - 42889,50            |
| Efavirenz 600 mg/day + Lamivudine/Zidovudine 150/300 mg 12/12h                                          | 1                    | 30              | 137,80                                              | 0,25 - 74109,50            |
| All treatments                                                                                          | 5                    | 284             | 96,34                                               | 55,04 - 158,90             |
| Grade 3 and/or 4 clinical adverse events                                                                |                      |                 |                                                     |                            |
| ART                                                                                                     | Number of study arms | Number of women | Incidence rate (number of events/1000 person-years) | Credibility interval (95%) |
| Elvitegravir/Cobicistat/Emtricitabine/Tenofovir disoproxil fumarate 150/150/200/300 mg/day              | 1                    | 289             | 93,37                                               | 0,17 - 50589,50            |

**Table S5 – Adverse events reported by studies (continuation)**

| Grade 3 and/or 4 clinical adverse events                                                                |                      |                 |                                                     |                            |
|---------------------------------------------------------------------------------------------------------|----------------------|-----------------|-----------------------------------------------------|----------------------------|
| ART                                                                                                     | Number of study arms | Number of women | Incidence rate (number of events/1000 person-years) | Credibility interval (95%) |
| Atazanavir 300 /day + Ritonavir 100 mg/day + Emtricitabine/Tenofovir disoproxil fumarate 200/300 mg/day | 1                    | 286             | 117,60                                              | 0,22 - 62379,00            |
| Nevirapine 200 mg 12/12h + Emtricitabine/Tenofovir disoproxil fumarate 200/300 mg/day                   | 2                    | 370             | 45,83                                               | 2,46 - 876,20              |
| Lopinavir/Ritonavir 400/100 mg 12/12h + Emtricitabine/Tenofovir disoproxil fumarate 200/300 mg/day      | 2                    | 371             | 45,40                                               | 1,90 - 1001,00             |
| All treatments                                                                                          | 6                    | 1316            | 59,93                                               | 33,74 - 104,60             |
| Grade 3 and/or 4 laboratory adverse events                                                              |                      |                 |                                                     |                            |
| ART                                                                                                     | Number of study arms | Number of women | Incidence rate (number of events/1000 person-years) | Credibility interval (95%) |
| Elvitegravir/Cobicistat/Emtricitabine/Tenofovir disoproxil fumarate 150/150/200/300 mg/day              | 1                    | 289             | 251,40                                              | 0,46 - 136000,00           |
| Atazanavir 300 /day + Ritonavir 100 mg/day + Emtricitabine/Tenofovir disoproxil fumarate 200/300 mg/day | 1                    | 286             | 703,70                                              | 1,32 - 364000,00           |
| Nevirapine 200 mg 12/12h + Emtricitabine/Tenofovir disoproxil fumarate 200/300 mg/day                   | 2                    | 370             | 86,76                                               | 5,09 - 1528,00             |
| Lopinavir/Ritonavir 400/100 mg 12/12h + Emtricitabine/Tenofovir disoproxil fumarate 200/300 mg/day      | 2                    | 371             | 71,04                                               | 4,07 - 1235,00             |
| Bictegravir/Emtricitabine/Tenofovir alafenamide 50/200/25 mg/day                                        | 1                    | 234             | 188,80                                              | 0,35 - 100900,00           |
| All treatments                                                                                          | 7                    | 1550            | 145,10                                              | 57,71 - 359,90             |
| Grade 3 clinical and/or laboratory adverse events                                                       |                      |                 |                                                     |                            |
| ART                                                                                                     | Number of study arms | Number of women | Incidence rate (number of events/1000 person-years) | Credibility interval (95%) |
| Atazanavir 300 /day + Ritonavir 100 mg/day + Emtricitabine/Tenofovir disoproxil fumarate 200/300 mg/day | 1                    | 247             | 181,00                                              | 0,34 - 98849,50            |
| Dolutegravir/Abacavir/Lamivudine 50/600/300 mg/day                                                      | 1                    | 248             | 83,97                                               | 0,16 - 45879,50            |
| All treatments                                                                                          | 2                    | 495             | 125,50                                              | 3,51 - 4295,00             |

**Table S5 – Adverse events reported by studies (continuation)**

| Grade 4 clinical and/or laboratory adverse events                                                       |                      |                 |                                                     |                            |
|---------------------------------------------------------------------------------------------------------|----------------------|-----------------|-----------------------------------------------------|----------------------------|
| ART                                                                                                     | Number of study arms | Number of women | Incidence rate (number of events/1000 person-years) | Credibility interval (95%) |
| Atazanavir 300 /day + Ritonavir 100 mg/day + Emtricitabine/Tenofovir disoproxil fumarate 200/300 mg/day | 1                    | 247             | 42,49                                               | 0,08 - 23669,50            |
| Grade 4 clinical and/or laboratory adverse events                                                       |                      |                 |                                                     |                            |
| ART                                                                                                     | Number of study arms | Number of women | Incidence rate (number of events/1000 person-years) | Credibility interval (95%) |
| Dolutegravir/Abacavir/Lamivudine 50/600/300 mg/day                                                      | 1                    | 248             | 12,36                                               | 0,02 - 7240,75             |
| All treatments                                                                                          | 2                    | 495             | 25,05                                               | 0,50 - 1017,00             |
| Grade 4 clinical adverse events                                                                         |                      |                 |                                                     |                            |
| ART                                                                                                     | Number of study arms | Number of women | Incidence rate (number of events/1000 person-years) | Credibility interval (95%) |
| Nevirapine 200 mg 12/12h + Emtricitabine/Tenofovir disoproxil fumarate 200/300 mg/day                   | 1                    | 249             | 8,60                                                | 0,02 - 4567,85             |
| Lopinavir/Ritonavir 400/100 mg 12/12h + Emtricitabine/Tenofovir disoproxil fumarate 200/300 mg/day      | 1                    | 251             | 9,79                                                | 0,02 - 5430,00             |
| All treatments                                                                                          | 2                    | 500             | 9,31                                                | 0,39 - 216,30              |
| Serious clinical and/or laboratory adverse events                                                       |                      |                 |                                                     |                            |
| ART                                                                                                     | Number of study arms | Number of women | Incidence rate (number of events/1000 person-years) | Credibility interval (95%) |
| Atazanavir 300 /day + Ritonavir 100 mg/day + Emtricitabine/Tenofovir disoproxil fumarate 200/300 mg/day | 1                    | 247             | 96,95                                               | 0,18 - 51859,50            |
| Dolutegravir/Abacavir/Lamivudine 50/600/300 mg/day                                                      | 2                    | 307             | 67,41                                               | 2,66 - 1763,95             |
| Nevirapine 200 mg 12/12h + Emtricitabine/Tenofovir disoproxil fumarate 200/300 mg/day                   | 2                    | 370             | 30,05                                               | 1,33 - 637,10              |
| Lopinavir/Ritonavir 400/100 mg 12/12h + Emtricitabine/Tenofovir disoproxil fumarate 200/300 mg/day      | 2                    | 371             | 20,74                                               | 0,78 - 491,70              |
| Darunavir/Cobicistat/Emtricitabine/Tenofovir alafenamide 800/150/200/10 mg/day                          | 2                    | 184             | 40,91                                               | 1,16 - 1488,95             |
| Darunavir/Cobicistat 800/150 mg/day + Emtricitabine/Tenofovir disoproxil fumarate 200/300 mg/day        | 1                    | 41              | 95,23                                               | 0,17 - 53989,50            |

**Table S5 – Adverse events reported by studies (continuation)**

| Serious clinical and/or laboratory adverse events                                                       |                      |                 |                                                     |                            |
|---------------------------------------------------------------------------------------------------------|----------------------|-----------------|-----------------------------------------------------|----------------------------|
| ART                                                                                                     | Number of study arms | Number of women | Incidence rate (number of events/1000 person-years) | Credibility interval (95%) |
| Bictegravir/Emtricitabine/Tenofovir alafenamide 50/200/25 mg/day                                        | 1                    | 234             | 30,64                                               | 0,06 - 17229,50            |
| Efavirenz 600 mg/day + Tenofovir disoproxil fumarate 300 mg/day + Lamivudine 300 mg/day                 | 1                    | 29              | 112,10                                              | 0,21 - 61089,00            |
| Efavirenz 600 mg/day + Lamivudine/Zidovudine 150/300 mg 12/12h                                          | 1                    | 30              | 126,40                                              | 0,23 - 69389,00            |
| All treatments                                                                                          | 13                   | 1813            | 49,34                                               | 31,60 - 77,10              |
| Grade 3 and/or 4 clinical and/or laboratory adverse events related to ART                               |                      |                 |                                                     |                            |
| ART                                                                                                     | Number of study arms | Number of women | Incidence rate (number of events/1000 person-years) | Credibility interval (95%) |
| Darunavir/Cobicistat/Emtricitabine/Tenofovir alafenamide 800/150/200/10 mg/day                          | 2                    | 184             | 21,91                                               | 0,47 - 943,60              |
| Darunavir/Cobicistat 800/150 mg/day + Emtricitabine/Tenofovir disoproxil fumarate 200/300 mg/day        | 1                    | 41              | 42,17                                               | 0,06 - 24359,50            |
| All treatments                                                                                          | 3                    | 225             | 27,75                                               | 2,56 - 272,90              |
| Serious clinical and/or laboratory adverse events related to ART                                        |                      |                 |                                                     |                            |
| ART                                                                                                     | Number of study arms | Number of women | Incidence rate (number of events/1000 person-years) | Credibility interval (95%) |
| Atazanavir 300 /day + Ritonavir 100 mg/day + Emtricitabine/Tenofovir disoproxil fumarate 200/300 mg/day | 1                    | 247             | 12,70                                               | 0,02 - 7228,85             |
| Dolutegravir/Abacavir/Lamivudine 50/600/300 mg/day                                                      | 1                    | 248             | 0,00                                                | 0,00 - 0,21                |
| Darunavir/Cobicistat/Emtricitabine/Tenofovir alafenamide 800/150/200/10 mg/day                          | 2                    | 184             | 0,00                                                | 0,00 - 0,12                |
| Darunavir/Cobicistat 800/150 mg/day + Emtricitabine/Tenofovir disoproxil fumarate 200/300 mg/day        | 1                    | 41              | 68,36                                               | 0,11 - 39559,00            |
| Bictegravir/Emtricitabine/Tenofovir alafenamide 50/200/25 mg/day                                        | 1                    | 234             | 0,00                                                | 0,00 - 0,20                |
| All treatments                                                                                          | 6                    | 954             | 1,09                                                | 0,01 - 21,47               |

**Table S5 – Adverse events reported by studies (continuation)**

| Serious clinical adverse events related to ART                                                          |                      |                 |                                                     |                            |
|---------------------------------------------------------------------------------------------------------|----------------------|-----------------|-----------------------------------------------------|----------------------------|
| ART                                                                                                     | Number of study arms | Number of women | Incidence rate (number of events/1000 person-years) | Credibility interval (95%) |
| Elvitegravir/Cobicistat/Emtricitabine/Tenofovir disoproxil fumarate 150/150/200/300 mg/day              | 1                    | 289             | 10,21                                               | 0,02 - 5968,00             |
| Atazanavir 300 /day + Ritonavir 100 mg/day + Emtricitabine/Tenofovir disoproxil fumarate 200/300 mg/day | 1                    | 286             | 18,85                                               | 0,03 - 10450,00            |
| Dolutegravir/Abacavir/Lamivudine 50/600/300 mg/day                                                      | 1                    | 248             | 0,00                                                | 0,00 - 0,21                |
| Serious clinical adverse events related to ART                                                          |                      |                 |                                                     |                            |
| ART                                                                                                     | Number of study arms | Number of women | Incidence rate (number of events/1000 person-years) | Credibility interval (95%) |
| Darunavir/Cobicistat/Emtricitabine/Tenofovir alafenamide 800/150/200/10 mg/day                          | 1                    | 140             | 0,00                                                | 0,00 - 0,35                |
| Bictegravir/Emtricitabine/Tenofovir alafenamide 50/200/25 mg/day                                        | 1                    | 234             | 0,00                                                | 0,00 - 0,20                |
| All treatments                                                                                          | 5                    | 1197            | 1,53                                                | 0,01 - 21,29               |
| Death from all causes                                                                                   |                      |                 |                                                     |                            |
| ART                                                                                                     | Number of study arms | Number of women | Incidence rate (number of events/1000 person-years) | Credibility interval (95%) |
| Elvitegravir/Cobicistat/Emtricitabine/Tenofovir disoproxil fumarate 150/150/200/300 mg/day              | 1                    | 289             | 0,00                                                | 0,00 - 0,17                |
| Atazanavir 300 /day + Ritonavir 100 mg/day + Emtricitabine/Tenofovir disoproxil fumarate 200/300 mg/day | 2                    | 533             | 0,73                                                | 0,00 - 60,56               |
| Dolutegravir/Abacavir/Lamivudine 50/600/300 mg/day                                                      | 2                    | 307             | 1,04                                                | 0,00 - 72,82               |
| Nevirapine 200 mg 12/12h + Emtricitabine/Tenofovir disoproxil fumarate 200/300 mg/day                   | 2                    | 370             | 7,87                                                | 0,26 - 238,40              |
| Lopinavir/Ritonavir 400/100 mg 12/12h + Emtricitabine/Tenofovir disoproxil fumarate 200/300 mg/day      | 2                    | 371             | 5,75                                                | 0,08 - 226,10              |
| Darunavir/Cobicistat/Emtricitabine/Tenofovir alafenamide 800/150/200/10 mg/day                          | 2                    | 184             | 0,00                                                | 0,00 - 0,09                |
| Darunavir/Cobicistat 800/150 mg/day + Emtricitabine/Tenofovir disoproxil fumarate 200/300 mg/day        | 1                    | 41              | 0,00                                                | 0,00 - 1,07                |
| Bictegravir/Emtricitabine/Tenofovir alafenamide 50/200/25 mg/day                                        | 1                    | 234             | 0,00                                                | 0,00 - 0,20                |

**Table S5 – Adverse events reported by studies (conclusion)**

| Death from all causes                                                                                   |                      |                 |                                                     |                            |
|---------------------------------------------------------------------------------------------------------|----------------------|-----------------|-----------------------------------------------------|----------------------------|
| ART                                                                                                     | Number of study arms | Number of women | Incidence rate (number of events/1000 person-years) | Credibility interval (95%) |
| Efavirenz 600 mg/day + Tenofovir disoproxil fumarate 300 mg/day + Lamivudine 300 mg/day                 | 1                    | 29              | 7,30                                                | 0,01 - 4814,00             |
| Efavirenz 600 mg/day + Lamivudine/Zidovudine 150/300 mg 12/12h                                          | 1                    | 30              | 7,42                                                | 0,01 - 4967,95             |
| All treatments                                                                                          | 15                   | 2388            | 4,47                                                | 1,42 - 7,91                |
| Death from adverse events related to ART                                                                |                      |                 |                                                     |                            |
| ART                                                                                                     | Number of study arms | Number of women | Incidence rate (number of events/1000 person-years) | Credibility interval (95%) |
| Elvitegravir/Cobicistat/Emtricitabine/Tenofovir disoproxil fumarate 150/150/200/300 mg/day              | 1                    | 289             | 0,00                                                | 0,00 - 0,17                |
| Atazanavir 300 /day + Ritonavir 100 mg/day + Emtricitabine/Tenofovir disoproxil fumarate 200/300 mg/day | 2                    | 533             | 0,00                                                | 0,00 - 0,03                |
| Dolutegravir/Abacavir/Lamivudine 50/600/300 mg/day                                                      | 2                    | 307             | 0,00                                                | 0,00 - 0,05                |
| Nevirapine 200 mg 12/12h + Emtricitabine/Tenofovir disoproxil fumarate 200/300 mg/day                   | 2                    | 370             | 0,29                                                | 0,00 - 20,77               |
| Lopinavir/Ritonavir 400/100 mg 12/12h + Emtricitabine/Tenofovir disoproxil fumarate 200/300 mg/day      | 2                    | 371             | 0,94                                                | 0,00 - 60,39               |
| Darunavir/Cobicistat/Emtricitabine/Tenofovir alafenamide 800/150/200/10 mg/day                          | 2                    | 184             | 0,00                                                | 0,00 - 0,12                |
| Darunavir/Cobicistat 800/150 mg/day + Emtricitabine/Tenofovir disoproxil fumarate 200/300 mg/day        | 1                    | 41              | 0,00                                                | 0,00 - 1,07                |
| Bictegravir/Emtricitabine/Tenofovir alafenamide 50/200/25 mg/day                                        | 1                    | 234             | 0,00                                                | 0,00 - 0,20                |
| Efavirenz 600 mg/day + Tenofovir disoproxil fumarate 300 mg/day + Lamivudine 300 mg/day                 | 1                    | 29              | 0,00                                                | 0,00 - 0,48                |
| Efavirenz 600 mg/day + Lamivudine/Zidovudine 150/300 mg 12/12h                                          | 1                    | 30              | 0,00                                                | 0,00 - 0,49                |
| All treatments                                                                                          | 15                   | 2388            | 0,18                                                | 0,00 - 1,56                |



**Table S6 - Adverse events by antiretroviral regimen (to be continued)**

| Atazanavir 300 mg/day + Ritonavir 100 mg/day + Emtricitabine/Tenofovir disoproxil fumarate 200/300 mg/day |                      |                 |                                                     |                            |
|-----------------------------------------------------------------------------------------------------------|----------------------|-----------------|-----------------------------------------------------|----------------------------|
| Outcome                                                                                                   | Number of study arms | Number of women | Incidence rate (number of events/1000 person-years) | Credibility interval (95%) |
| Discontinuation due to adverse events                                                                     | 2                    | 533             | 81,97                                               | 4,16 - 1611,00             |
| Clinical and/or laboratory adverse events                                                                 | 1                    | 247             | 972,10                                              | 1,82 - 511395,00           |
| Clinical and/or laboratory adverse events related to ART                                                  | 1                    | 247             | 594,80                                              | 1,10 - 318800,00           |
| Clinical adverse events related to ART                                                                    | 1                    | 286             | 570,60                                              | 1,07 - 315895,00           |
| Grade 3 and/or 4 clinical adverse events                                                                  | 1                    | 286             | 117,60                                              | 0,22 - 62379,00            |
| Grade 3 and/or 4 laboratory adverse events                                                                | 1                    | 286             | 703,70                                              | 1,32 - 364000,00           |
| Grade 3 clinical and/or laboratory adverse events                                                         | 1                    | 247             | 181,00                                              | 0,34 - 98849,50            |
| Grade 4 clinical and/or laboratory adverse events                                                         | 1                    | 247             | 42,49                                               | 0,08 - 23669,50            |
| Serious clinical and/or laboratory adverse events                                                         | 1                    | 247             | 96,95                                               | 0,18 - 51859,50            |
| Serious clinical and/or laboratory adverse events related to ART                                          | 1                    | 247             | 12,70                                               | 0,02 - 7228,85             |
| Serious clinical adverse events related to ART                                                            | 1                    | 286             | 18,85                                               | 0,03 - 10450,00            |
| Death from all causes                                                                                     | 2                    | 533             | 0,73                                                | 0,00 - 60,56               |
| Death from adverse events related to ART                                                                  | 2                    | 533             | 0,00                                                | 0,00 - 0,03                |
| Bictegravir/Emtricitabine/Tenofovir alafenamide 50/200/25 mg/day                                          |                      |                 |                                                     |                            |
| Outcome                                                                                                   | Number of study arms | Number of women | Incidence rate (number of events/1000 person-years) | Credibility interval (95%) |
| Discontinuation due to adverse events                                                                     | 1                    | 234             | 0,00                                                | 0,00 - 0,20                |
| Discontinuation due to ART-related adverse events                                                         | 1                    | 234             | 0,00                                                | 0,00 - 0,20                |
| Clinical and/or laboratory adverse events                                                                 | 1                    | 234             | 718,40                                              | 1,35 - 375995,00           |
| Clinical and/or laboratory adverse events related to ART                                                  | 1                    | 234             | 91,31                                               | 0,17 - 49459,50            |
| Grade 3 and/or 4 laboratory adverse events                                                                | 1                    | 234             | 188,80                                              | 0,35 - 100900,00           |
| Serious clinical and/or laboratory adverse events                                                         | 1                    | 234             | 30,64                                               | 0,06 - 17229,50            |
| Serious clinical and/or laboratory adverse events related to ART                                          | 1                    | 234             | 0,00                                                | 0,00 - 0,20                |
| Serious clinical adverse events related to ART                                                            | 1                    | 234             | 0,00                                                | 0,00 - 0,20                |

**Table S6 - Adverse events by antiretroviral regimen (continuation)**

| Bictegravir/Emtricitabine/Tenofovir alafenamide 50/200/25 mg/day                                 |                      |                 |                                                     |                            |
|--------------------------------------------------------------------------------------------------|----------------------|-----------------|-----------------------------------------------------|----------------------------|
| Outcome                                                                                          | Number of study arms | Number of women | Incidence rate (number of events/1000 person-years) | Credibility interval (95%) |
| Death from all causes                                                                            | 1                    | 234             | 0,00                                                | 0,00 - 0,20                |
| Death from adverse events related to ART                                                         | 1                    | 234             | 0,00                                                | 0,00 - 0,20                |
| Darunavir/Cobicistat 800/150 mg/day + Emtricitabine/Tenofovir disoproxil fumarate 200/300 mg/day |                      |                 |                                                     |                            |
| Outcome                                                                                          | Number of study arms | Number of women | Incidence rate (number of events/1000 person-years) | Credibility interval (95%) |
| Discontinuation due to adverse events                                                            | 1                    | 41              | 121,30                                              | 0,21 - 67219,50            |
| Discontinuation due to ART-related adverse events                                                | 1                    | 41              | 121,30                                              | 0,21 - 67219,50            |
| Clinical and/or laboratory adverse events                                                        | 1                    | 41              | 913,40                                              | 1,67 - 482400,00           |
| Clinical and/or laboratory adverse events related to ART                                         | 1                    | 41              | 545,80                                              | 0,99 - 304395,00           |
| Grade 3 and/or 4 clinical and/or laboratory adverse events                                       | 1                    | 41              | 95,23                                               | 0,17 - 53989,50            |
| Serious clinical and/or laboratory adverse events                                                | 1                    | 41              | 95,23                                               | 0,17 - 53989,50            |
| Grade 3 and/or 4 clinical and/or laboratory adverse events related to ART                        | 1                    | 41              | 42,17                                               | 0,06 - 24359,50            |
| Serious clinical and/or laboratory adverse events related to ART                                 | 1                    | 41              | 68,36                                               | 0,11 - 39559,00            |
| Death from all causes                                                                            | 1                    | 41              | 0,00                                                | 0,00 - 1,07                |
| Death from adverse events related to ART                                                         | 1                    | 41              | 0,00                                                | 0,00 - 1,07                |
| Darunavir/Cobicistat/Emtricitabine/Tenofovir alafenamide 800/150/200/10 mg/day                   |                      |                 |                                                     |                            |
| Outcome                                                                                          | Number of study arms | Number of women | Incidence rate (number of events/1000 person-years) | Credibility interval (95%) |
| Discontinuation due to adverse events                                                            | 2                    | 184             | 15,41                                               | 0,21 - 876,59              |
| Discontinuation due to ART-related adverse events                                                | 2                    | 184             | 15,41                                               | 0,21 - 876,59              |
| Clinical and/or laboratory adverse events                                                        | 2                    | 184             | 922,90                                              | 56,88 - 15170,00           |
| Clinical and/or laboratory adverse events related to ART                                         | 2                    | 184             | 357,80                                              | 8,25 - 15370,00            |
| Grade 3 and/or 4 clinical and/or laboratory adverse events                                       | 2                    | 184             | 80,75                                               | 3,16 - 2072,00             |
| Serious clinical and/or laboratory adverse events                                                | 2                    | 184             | 40,91                                               | 1,16 - 1488,95             |

**Table S6 - Adverse events by antiretroviral regimen (continuation)**

| Darunavir/Cobicistat/Emtricitabine/Tenofovir alafenamide 800/150/200/10 mg/day    |                      |                 |                                                     |                            |
|-----------------------------------------------------------------------------------|----------------------|-----------------|-----------------------------------------------------|----------------------------|
| Outcome                                                                           | Number of study arms | Number of women | Incidence rate (number of events/1000 person-years) | Credibility interval (95%) |
| Grade 3 and/or 4 clinical and/or laboratory adverse events related to ART         | 2                    | 184             | 21,91                                               | 0,47 - 943,60              |
| Serious clinical and/or laboratory adverse events related to ART                  | 2                    | 184             | 0,00                                                | 0,00 - 0,12                |
| Serious clinical adverse events related to ART                                    | 1                    | 140             | 0,00                                                | 0,00 - 0,35                |
| Death from all causes                                                             | 2                    | 184             | 0,00                                                | 0,00 - 0,09                |
| Death from adverse events related to ART                                          | 2                    | 184             | 0,00                                                | 0,00 - 0,12                |
| Dolutegravir/Abacavir/Lamivudine 50/600/300 mg/day                                |                      |                 |                                                     |                            |
| Outcome                                                                           | Number of study arms | Number of women | Incidence rate (number of events/1000 person-years) | Credibility interval (95%) |
| Osteoporosis from adverse events                                                  | 1                    | 59              | 6,15                                                | 0,01 - 4037,00             |
| Discontinuation due to adverse events                                             | 2                    | 307             | 61,58                                               | 2,14 - 1797,00             |
| Clinical and/or laboratory adverse events                                         | 1                    | 248             | 933,00                                              | 1,69 - 498690,00           |
| Clinical and/or laboratory adverse events related to ART                          | 1                    | 248             | 395,20                                              | 0,73 - 211000,00           |
| Grade 3 clinical and/or laboratory adverse events                                 | 1                    | 248             | 83,97                                               | 0,16 - 45879,50            |
| Grade 4 clinical and/or laboratory adverse events                                 | 1                    | 248             | 12,36                                               | 0,02 - 7240,75             |
| Serious clinical and/or laboratory adverse events                                 | 2                    | 307             | 67,41                                               | 2,66 - 1763,95             |
| Serious clinical and/or laboratory adverse events related to ART                  | 1                    | 248             | 0,00                                                | 0,00 - 0,21                |
| Serious clinical adverse events related to ART                                    | 1                    | 248             | 0,00                                                | 0,00 - 0,21                |
| Death from all causes                                                             | 2                    | 307             | 1,04                                                | 0,00 - 72,82               |
| Death from adverse events related to ART                                          | 2                    | 307             | 0,00                                                | 0,00 - 0,05                |
| Efavirenz 600 mg/day + Emtricitabine/Tenofovir disoproxil fumarate 200/300 mg/day |                      |                 |                                                     |                            |
| Outcome                                                                           | Number of study arms | Number of women | Incidence rate (number of events/1000 person-years) | Credibility interval (95%) |
| Laboratory adverse events                                                         | 1                    | 242             | 40,55                                               | 0,08 - 21369,50            |

**Table S6 - Adverse events by antiretroviral regimen (continuation)**

| Efavirenz 600 mg/day + Tenofovir disoproxil fumarate 300 mg/day + Lamivudine 300 mg/day    |                      |                 |                                                     |                            |
|--------------------------------------------------------------------------------------------|----------------------|-----------------|-----------------------------------------------------|----------------------------|
| Outcome                                                                                    | Number of study arms | Number of women | Incidence rate (number of events/1000 person-years) | Credibility interval (95%) |
| Discontinuation due to adverse events                                                      | 1                    | 29              | 0,00                                                | 0,00 - 0,48                |
| Discontinuation due to ART-related adverse events                                          | 1                    | 29              | 0,00                                                | 0,00 - 0,48                |
| Grade 3 and/or 4 clinical and/or laboratory adverse events                                 | 1                    | 29              | 77,39                                               | 0,14 - 42889,50            |
| Serious clinical and/or laboratory adverse events                                          | 1                    | 29              | 112,10                                              | 0,21 - 61089,00            |
| Death from all causes                                                                      | 1                    | 29              | 7,30                                                | 0,01 - 4814,00             |
| Death from adverse events related to ART                                                   | 1                    | 29              | 0,00                                                | 0,00 - 0,48                |
| Efavirenz 600 mg/day + Lamivudine/Zidovudine 150/300 mg 12/12h                             |                      |                 |                                                     |                            |
| Outcome                                                                                    | Number of study arms | Number of women | Incidence rate (number of events/1000 person-years) | Credibility interval (95%) |
| Discontinuation due to adverse events                                                      | 1                    | 30              | 126,40                                              | 0,23 - 69389,00            |
| Laboratory adverse events                                                                  | 1                    | 241             | 65,60                                               | 0,12 - 36399,50            |
| Grade 3 and/or 4 clinical and/or laboratory adverse events                                 | 1                    | 30              | 137,80                                              | 0,25 - 74109,50            |
| Serious clinical and/or laboratory adverse events                                          | 1                    | 30              | 126,40                                              | 0,23 - 69389,00            |
| Death from all causes                                                                      | 1                    | 30              | 7,42                                                | 0,01 - 4967,95             |
| Death from adverse events related to ART                                                   | 1                    | 30              | 0,00                                                | 0,00 - 0,49                |
| Elvitegravir/Cobicistat/Emtricitabine/Tenofovir disoproxil fumarate 150/150/200/300 mg/day |                      |                 |                                                     |                            |
| Outcome                                                                                    | Number of study arms | Number of women | Incidence rate (number of events/1000 person-years) | Credibility interval (95%) |
| Discontinuation due to adverse events                                                      | 1                    | 289             | 18,05                                               | 0,03 - 9868,95             |
| Clinical adverse events related to ART                                                     | 1                    | 289             | 322,40                                              | 0,60 - 174800,00           |
| Grade 3 and/or 4 clinical adverse events                                                   | 1                    | 289             | 93,37                                               | 0,17 - 50589,50            |
| Grade 3 and/or 4 laboratory adverse events                                                 | 1                    | 289             | 251,40                                              | 0,46 - 136000,00           |
| Serious clinical adverse events related to ART                                             | 1                    | 289             | 10,21                                               | 0,02 - 5968,00             |
| Death from all causes                                                                      | 1                    | 289             | 0,00                                                | 0,00 - 0,17                |
| Death from adverse events related to ART                                                   | 1                    | 289             | 0,00                                                | 0,00 - 0,17                |

**Table S6 - Adverse events by antiretroviral regimen (continuation)**

| Lopinavir/Ritonavir 400/100 mg 12/12h + Emtricitabine/Tenofovir disoproxil fumarate 200/300 mg/day |                      |                 |                                                     |                            |
|----------------------------------------------------------------------------------------------------|----------------------|-----------------|-----------------------------------------------------|----------------------------|
| Outcome                                                                                            | Number of study arms | Number of women | Incidence rate (number of events/1000 person-years) | Credibility interval (95%) |
| Discontinuation due to adverse events                                                              | 2                    | 371             | 0,31                                                | 0,00 - 29,70               |
| Discontinuation due to ART-related adverse events                                                  | 1                    | 251             | 0,00                                                | 0,00 - 0,06                |
| Grade 3 and/or 4 clinical adverse events                                                           | 2                    | 371             | 45,40                                               | 1,90 - 1001,00             |
| Grade 3 and/or 4 laboratory adverse events                                                         | 2                    | 371             | 71,04                                               | 4,07 - 1235,00             |
| Grade 4 clinical adverse events                                                                    | 1                    | 251             | 9,79                                                | 0,02 - 5430,00             |
| Serious clinical and/or laboratory adverse events                                                  | 2                    | 371             | 20,74                                               | 0,78 - 491,70              |
| Death from all causes                                                                              | 2                    | 371             | 5,75                                                | 0,08 - 226,10              |
| Death from adverse events related to ART                                                           | 2                    | 371             | 0,94                                                | 0,00 - 60,39               |
| Nevirapine 200 mg 12/12h + Emtricitabine/Tenofovir disoproxil fumarate 200/300 mg/day              |                      |                 |                                                     |                            |
| Outcome                                                                                            | Number of study arms | Number of women | Incidence rate (number of events/1000 person-years) | Credibility interval (95%) |
| Discontinuation due to adverse events                                                              | 2                    | 370             | 44,25                                               | 2,38 - 838,60              |
| Discontinuation due to ART-related adverse events                                                  | 1                    | 249             | 44,89                                               | 0,09 - 24219,50            |
| Grade 3 and/or 4 clinical adverse events                                                           | 2                    | 370             | 45,83                                               | 2,46 - 876,20              |
| Grade 3 and/or 4 laboratory adverse events                                                         | 2                    | 370             | 86,76                                               | 5,09 - 1528,00             |
| Grade 4 clinical adverse events                                                                    | 1                    | 249             | 8,60                                                | 0,02 - 4567,85             |
| Serious clinical and/or laboratory adverse events                                                  | 2                    | 370             | 30,05                                               | 1,33 - 637,10              |
| Death from all causes                                                                              | 2                    | 370             | 7,87                                                | 0,26 - 238,40              |
| Death from adverse events related to ART                                                           | 2                    | 370             | 0,29                                                | 0,00 - 20,77               |
| All treatments                                                                                     |                      |                 |                                                     |                            |
| Outcome                                                                                            | Number of study arms | Number of women | Incidence rate (number of events/1000 person-years) | Credibility interval (95%) |
| Discontinuation due to adverse events                                                              | 15                   | 2388            | 20,78                                               | 5,58 - 57,31               |
| Discontinuation due to ART-related adverse events                                                  | 7                    | 988             | 4,31                                                | 0,13 - 54,72               |
| Clinical and/or laboratory adverse events                                                          | 6                    | 954             | 888,20                                              | 759,90 - 1045,00           |
| Laboratory adverse events                                                                          | 2                    | 483             | 52,02                                               | 1,89 - 1388,00             |
| Clinical and/or laboratory adverse events related to ART                                           | 6                    | 954             | 341,60                                              | 133,60 - 862,70            |

**Table S6 - Adverse events by antiretroviral regimen (continuation)**

| All treatments                                                            |                      |                 |                                                     |                            |
|---------------------------------------------------------------------------|----------------------|-----------------|-----------------------------------------------------|----------------------------|
| Outcome                                                                   | Number of study arms | Number of women | Incidence rate (number of events/1000 person-years) | Credibility interval (95%) |
| Clinical adverse events related to ART                                    | 2                    | 575             | 431,50                                              | 13,84 - 13630,00           |
| Grade 3 and/or 4 clinical and/or laboratory adverse events                | 5                    | 284             | 96,34                                               | 55,04 - 158,90             |
| Grade 3 and/or 4 clinical adverse events                                  | 6                    | 1316            | 59,93                                               | 33,74 - 104,60             |
| Grade 3 and/or 4 laboratory adverse events                                | 7                    | 1550            | 145,10                                              | 57,71 - 359,90             |
| Grade 3 clinical and/or laboratory adverse events                         | 2                    | 495             | 125,50                                              | 3,51 - 4295,00             |
| Grade 4 clinical and/or laboratory adverse events                         | 2                    | 495             | 25,05                                               | 0,50 - 1017,00             |
| Grade 4 clinical adverse events                                           | 2                    | 500             | 9,31                                                | 0,39 - 216,30              |
| Serious clinical and/or laboratory adverse events                         | 13                   | 1813            | 49,34                                               | 31,60 - 77,10              |
| Grade 3 and/or 4 clinical and/or laboratory adverse events related to ART | 3                    | 225             | 27,75                                               | 2,56 - 272,90              |
| Serious clinical and/or laboratory adverse events related to ART          | 6                    | 954             | 1,09                                                | 0,01 - 21,47               |
| Serious clinical adverse events related to ART                            | 5                    | 1197            | 1,53                                                | 0,01 - 21,29               |
| Death from all causes                                                     | 15                   | 2388            | 4,47                                                | 1,42 - 7,91                |
| Death from adverse events related to ART                                  | 15                   | 2388            | 0,18                                                | 0,00 - 1,56                |
