# Supplementary material for: Rates of adverse events of antiretroviral therapy in women living with HIV/AIDS: a systematic review and meta-analysis
Source: PubMed Central journal article supplement — BMJ Open. 2024 Jul 31;14(7):e079292. doi: 10.1136/bmjopen-2023-079292 (PMC11293376; doi:10.1136/bmjopen-2023-079292), 2024-07-31
Supplement: bmjopen-14-7-s009.pdf [file bmjopen-14-7-s009.pdf]

## Forest plots with incidence rate analysis

**Figure S3 – Analysis of the incidence rates of any clinical and/or laboratory adverse event**

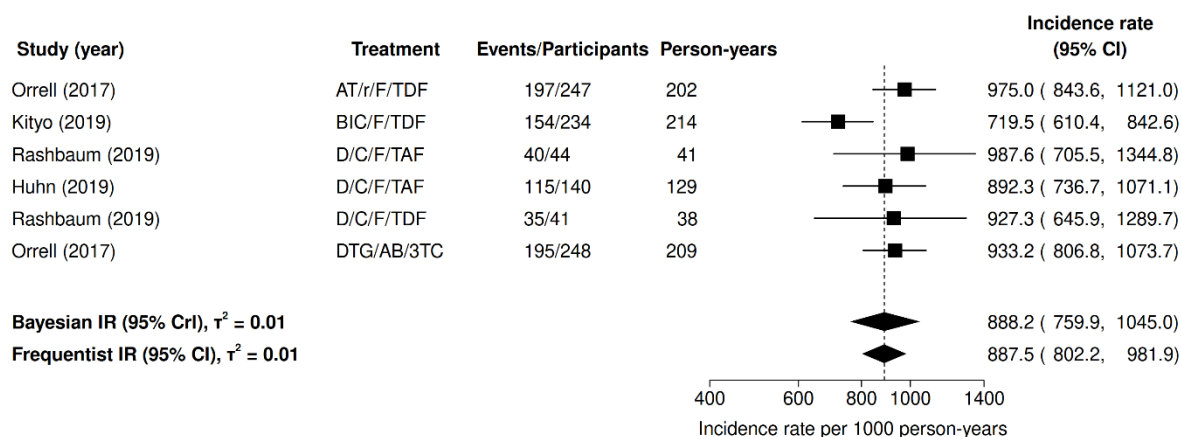

Forest plot of the incidence rate of any clinical and/or laboratory adverse event. Estimates are sorted by treatment type. Analyses are based on a random-effects model. IR denotes the incidence rate per 1000 person-years. 95% CrI denotes a 95% credible interval. 95% CI denotes a 95% confidence interval. Arrows indicate that the lower bound of the 95% CIs exceeds the graph's limits. For individual studies, the uncertainty around point estimates was represented by exact Poisson 95% confidence intervals.  $\tau^2$  denotes the between-study variance (on a log scale). The 95% prediction interval was 611.20 to 1300 events per 1000 person-years, suggesting high between-group heterogeneity. 3TC=lamivudine; AB=abacavir; AT=atazanavir; BIC=bictegravir; C=cobicistat; D=darunavir; F=emtricitabine; r=ritonavir; TAF=tenofovir alafenamide; TDF=tenofovir disoproxil fumarate.

**Figure S4 – Analysis of the incidence rates of discontinuation or dropouts/withdrawals due to adverse events**

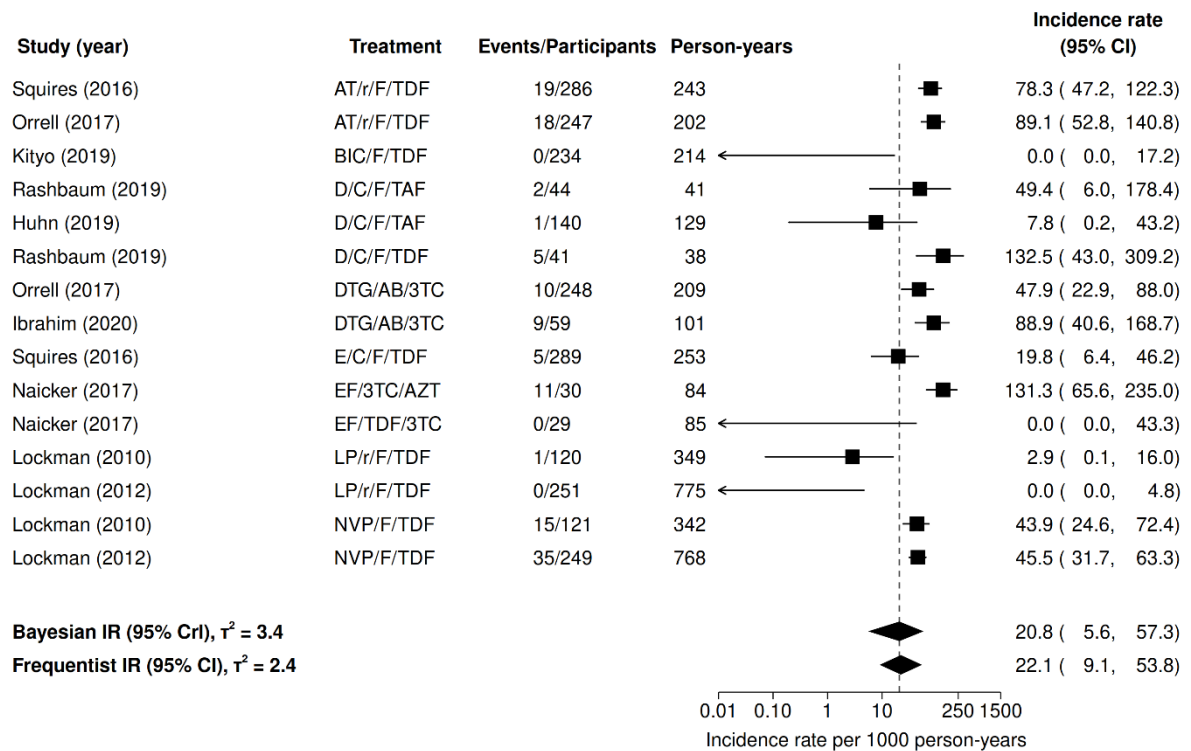

Forest plot of the incidence rate of discontinuation or dropouts/withdrawals due to adverse events. Estimates are sorted by treatment type. Analyses are based on a random-effects model. IR denotes the incidence rate per 1000 person-years. 95% CrI denotes a 95% credible interval. 95% CI denotes a 95% confidence interval. Arrows indicate that the lower bound of the 95% CIs exceeds the graph's limits. For individual studies, the uncertainty around point estimates was represented by exact Poisson 95% confidence intervals.  $\tau^2$  denotes the between-study variance (on a log scale). The 95% prediction interval was 0.25 to 1270 events per 1000 person-years, suggesting high between-group heterogeneity. 3TC=lamivudine; AB=abacavir; AT=atazanavir; AZT=zidovudine; BIC=bictegravir; C=cobicistat; D=darunavir; DTG=dolutegravir; E=elvitegravir; EF=efavirenz; F=emtricitabine; LP=lopinavir; NVP=nevirapine; r=ritonavir; TAF=tenofovir alafenamide; TDF=tenofovir disoproxil fumarate.

**Figure S5 – Analysis of the incidence rates of discontinuation or dropouts/withdrawals due to adverse events related to ART**

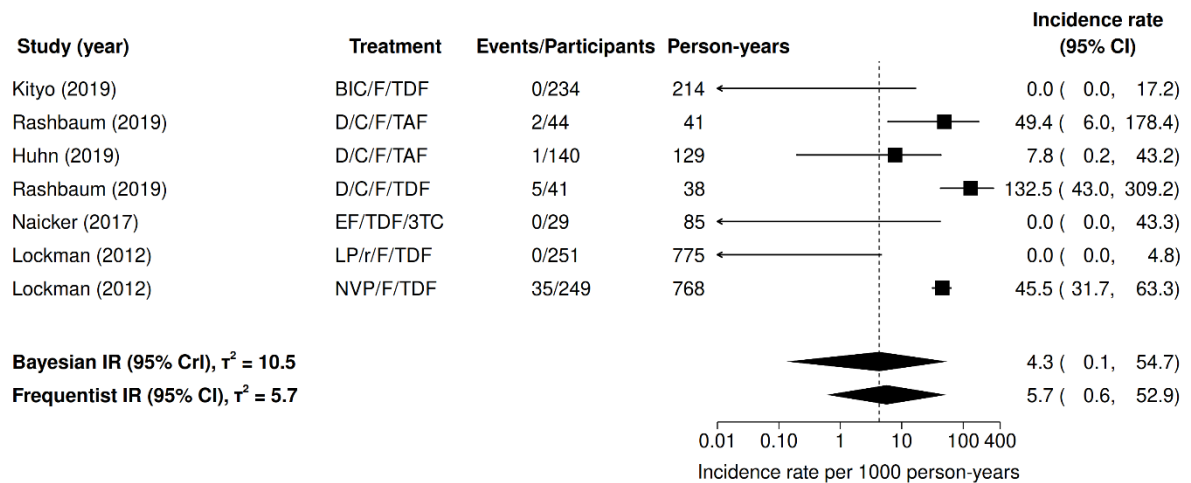

Forest plot of the incidence rate of discontinuation or dropouts/withdrawals due to adverse events related to ART. Estimates are sorted by treatment type. Analyses are based on a random-effects model. IR denotes the incidence rate per 1000 person-years. 95% CrI denotes a 95% credible interval. 95% CI denotes a 95% confidence interval. Arrows indicate that the lower bound of the 95% CIs exceeds the graph's limits. For individual studies, the uncertainty around point estimates was represented by exact Poisson 95% confidence intervals.  $\tau^2$  denotes the between-study variance (on a log scale). The 95% prediction interval was 0 to 5103.95 events per 1000 person-years, suggesting high between-group heterogeneity. 3TC=lamivudine; BIC=bictegravir; C=cobicistat; D=darunavir; EF=efavirenz; F=emtricitabine; LP=lopinavir; NVP=nevirapine; r=ritonavir; TAF=tenofovir alafenamide; TDF=tenofovir disoproxil fumarate.

**Figure S6 – Analyzes of incidence rates of death from all causes**

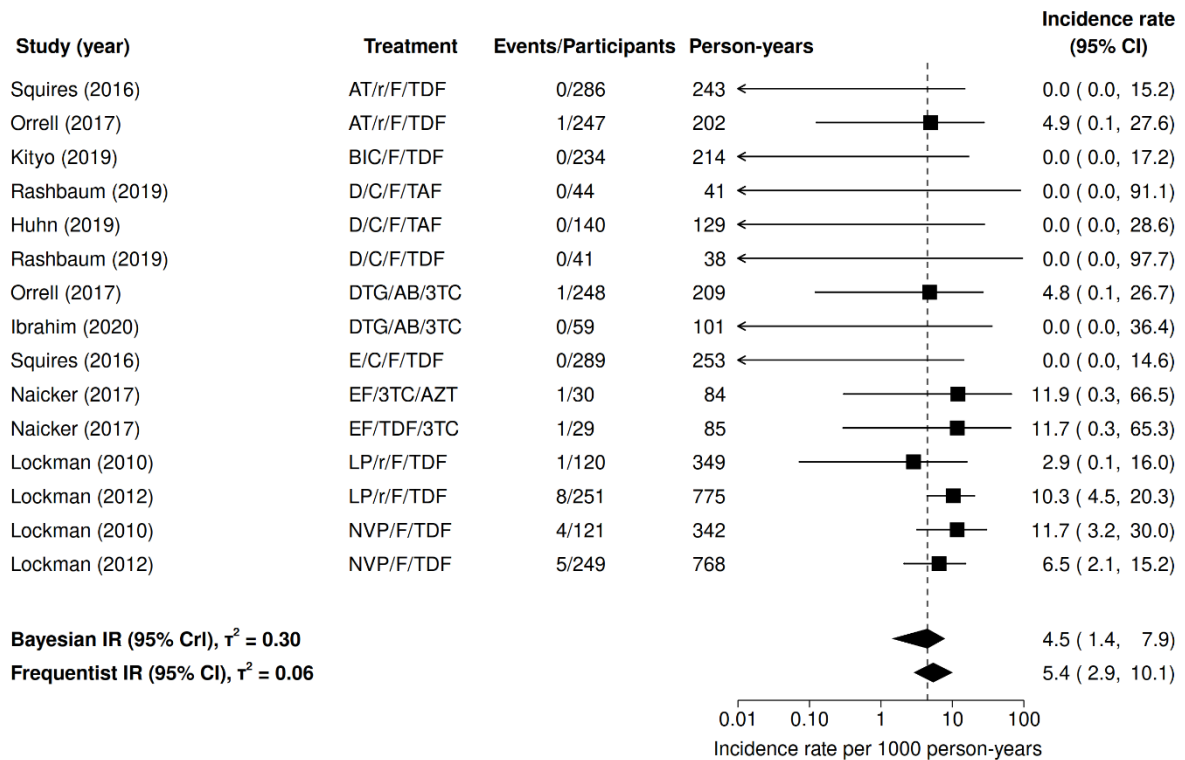

Forest plot of the incidence rate of death from all causes. Estimates are sorted by treatment type. Analyses are based on a random-effects model. IR denotes the incidence rate per 1000 person-years. 95% CrI denotes a 95% credible interval. 95% CI denotes a 95% confidence interval. Arrows indicate that the lower bound of the 95% CIs exceeds the graph's limits. For individual studies, the uncertainty around point estimates was represented by exact Poisson 95% confidence intervals.  $\tau^2$  denotes the between-study variance (on a log scale). The 95% prediction interval was 0.45 to 20.09 events per 1000 person-years. 3TC=lamivudine; AB=abacavir; AT=atazanavir; AZT=zidovudine; BIC=bictegravir; C=cobicistat; D=darunavir; DTG=dolutegravir; E=elvitegravir; EF=efavirenz; F=emtricitabine; LP=lopinavir; NVP=nevirapine; r=ritonavir; TAF=tenofovir alafenamide; TDF=tenofovir disoproxil fumarate.

**Figure S7 – Analysis of incidence rates of death from adverse events related to ART**

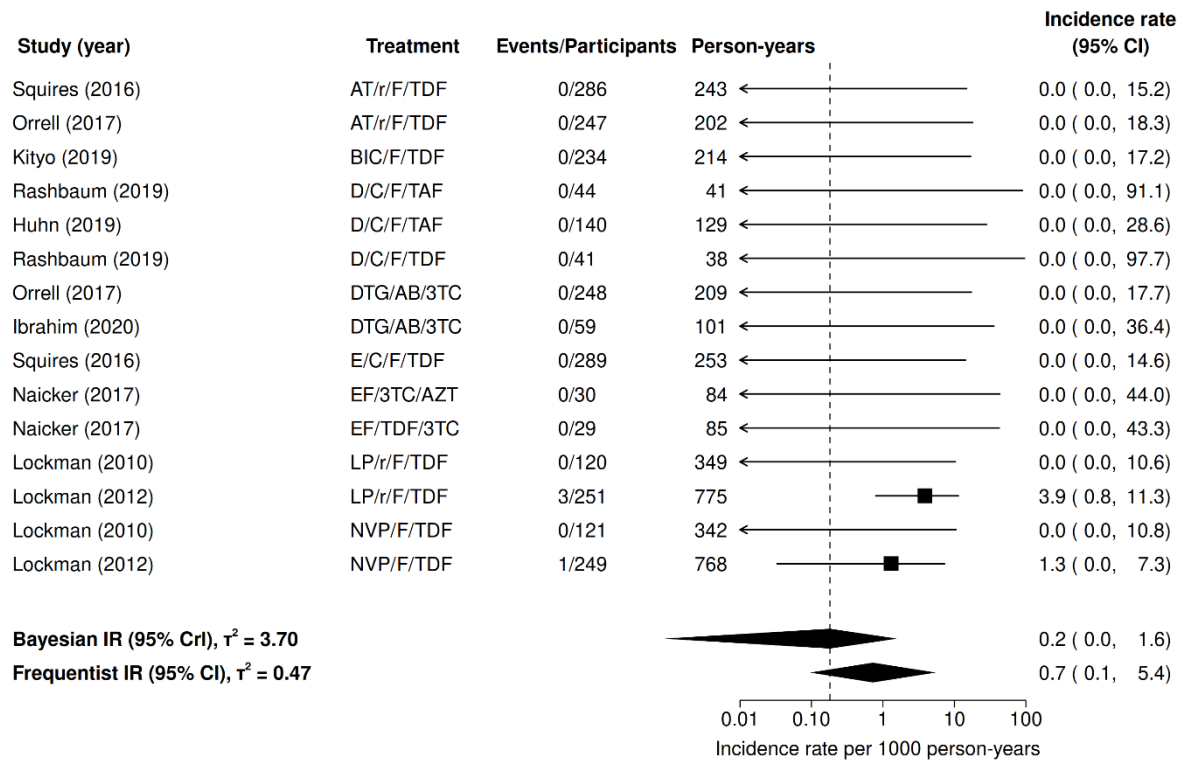

Forest plot of the incidence rate of death from adverse events related to ART. Estimates are sorted by treatment type. Analyses are based on a random-effects model. IR denotes the incidence rate per 1000 person-years. 95% CrI denotes a 95% credible interval. 95% CI denotes a 95% confidence interval. Arrows indicate that the lower bound of the 95% CIs exceeds the graph's limits. For individual studies, the uncertainty around point estimates was represented by exact Poisson 95% confidence intervals.  $\tau^2$  denotes the between-study variance (on a log scale). The 95% prediction interval was 0 to 12.05 events per 1000 person-years. 3TC=lamivudine; AB=abacavir; AT=atazanavir; AZT=zidovudine; BIC=bictegravir; C=cobicistat; D=darunavir; DTG=dolutegravir; E=elvitegravir; EF=efavirenz; F=emtricitabine; LP=lopinavir; NVP=nevirapine; r=ritonavir; TAF=tenofovir alafenamide; TDF=tenofovir disoproxil fumarate.
